# Supplementary material for: An analog to digital converter controls bistable transfer competence development of a widespread bacterial integrative and conjugative element
Source: eLife. 2020 Jul 28;9:e57915. doi: 10.7554/eLife.57915 (PMC7423338; doi:10.7554/eLife.57915)
Supplement: Figure 2—source data 1. [file elife-57915-fig2-data1.xlsx]

## Sheet: Sheet1
Source data for		Fig 2A
		(bars left to right)
	Date	181023
	Donor	6144		WT pME6032
	Recipient	2744
	Conditions	liquid MM succinate for 24 hours, IPTG 0.1 mM for donor not for recipient, mix donor with recipient 1:2, spread 20 uL on 0.2 um Sartorius filter on MM sucinate 0.01 mM IPTG plate for 48hours
	replicates	1	2	3
	D	40800	7100	390
	R	22800	23400	15000
	Tc	0	0	0	average	Sd
	Tc/D	0	0	0	0	0
	Tc/R	0	0	0	0	0
	Date	190128
	Donor	6316		WT pMEtciR
	Recipient	2744
	Conditions	liquid MM succinate for 24 hours, mix donor with recipient 1:2, spread 20 uL on 0.2 um Sartorius filter on MM sucinate plate for 48hours
	replicates	1	2	3
	D	48000	102000	1490
	R	620000	1200000	1060000
	Tc	7	6	0	average	Sd
	Tc/D	0.000145833	5.88235e-05	0	6.8219e-05	7.33692e-05
	Tc/R	1.12903e-05	5e-06	0	5.43011e-06	5.65744e-06
	Date	190128
	Donor	6316		WT pMEtciR
	Recipient	2744
	Conditions	liquid MM succinate for 24 hours, IPTG 0.1 mM for donor not for recipient, mix donor with recipient 1:2, spread 20 uL on 0.2 um Sartorius filter on MM sucinate 0.01 mM IPTG plate for 48hours
	replicates	1	2	3
	D	98000	79000	134000
	R	960000	920000	1150000
	Tc	1500	400	2800	average	Sd
	Tc/D	0.0153061	0.00506329	0.0208955	0.013755	0.00802929
	Tc/R	0.0015625	0.000434783	0.00243478	0.00147736	0.00100271
