# Supplementary material for: An analog to digital converter controls bistable transfer competence development of a widespread bacterial integrative and conjugative element
Source: eLife. 2020 Jul 28;9:e57915. doi: 10.7554/eLife.57915 (PMC7423338; doi:10.7554/eLife.57915)
Supplement: Figure 2—source data 2. [file elife-57915-fig2-data2.xlsx]

## Sheet: Fig2B
				75th percentile fluo intensity
File	Strain _nr		plasmid	rep1	rep2	rep3	mean	sd	Ttest
20161117_5585	5585	UWC1miniTn7 Pint-gfp	pMEtciR	4	3.29807	5.84058	4.37955	1.31306
20161117_5501iptg	5501	UWC1miniTn7 Pint-gfp	pME6032	4.05797	3.98317	7.65217	5.23111	2.09704	0.291594
20190925_5502	5502	UWC1miniTn7 PinrR-gfp	pME6032	44.9565	57.9565	29.2826	44.0652	14.3577
20190925_5586	5586	UWC1miniTn7 PinrR-gfp	pMEtciR	23.0543	23.4565	15.1014	20.5374	4.712	0.0542757
20190925_5503	5503	UWC1miniTn7-PalpA-gfp	pME6032	42.25	72	24	46.0833	24.2285
20190925_5587	5587	UWC1miniTn7-PalpA-gfp	pMEtci	77.5978	37.0652	51.8261	55.4964	20.5141	0.317312
20180503_5698	5698	UWC1miniTn7-PbisR-gfp	pME6032	43.3696			32.5266	7.22866
20180525_5698	5698	UWC1miniTn7-PbisR-gfp	pME6032		25.0725
201805030_5698+	5698	UWC1miniTn7-PbisR-gfp	pME6032			29.1377
20180503_5700	5700	UWC1miniTn7-PbisR-gfp	pMEtciR	54.721			56.7283	4.08333	0.00421275
20180525_5700	5700	UWC1miniTn7-PbisR-gfp	pMEtciR		64.8949
20180530_5700	5700	UWC1miniTn7-PbisR-gfp	pMEtciR			51.5
20180530_5700	5700	UWC1miniTn7-PbisR-gfp	pMEtciR			55.7971
