# Supplementary material for: An analog to digital converter controls bistable transfer competence development of a widespread bacterial integrative and conjugative element
Source: eLife. 2020 Jul 28;9:e57915. doi: 10.7554/eLife.57915 (PMC7423338; doi:10.7554/eLife.57915)
Supplement: Figure 2—source data 3. [file elife-57915-fig2-data3.xlsx]

## Sheet: 6423_fl1 copy
P. putida UWC1-ICEclc Pint-echerry
	pME6032			pMETciR
QQ_6423_fl1	FLUO_6423_fl1		QQ_6424_fl1	FLUO_6424_fl1
-3.52214	332.923		-3.47914	334.236
-3.21948	334.276		-3.17294	335.073
-3.07002	335.17		-3.02152	337.315
-2.96809	335.995		-2.91815	337.624
-2.88997	336.004		-2.83888	337.695
-2.8263	336.223		-2.77423	338.128
-2.77236	336.456		-2.71944	338.193
-2.72546	336.899		-2.67177	338.211
-2.68388	337.106		-2.62949	338.245
-2.64647	337.234		-2.59145	338.395
-2.61244	337.284		-2.55682	338.5
-2.5812	337.419		-2.52501	338.54
-2.55228	337.956		-2.49557	338.674
-2.52535	337.961		-2.46815	338.767
-2.50014	338.219		-2.44246	338.816
-2.47643	338.309		-2.41829	338.821
-2.45403	338.324		-2.39546	339.087
-2.43279	338.397		-2.37381	339.112
-2.4126	338.422		-2.35322	339.26
-2.39335	338.804		-2.33358	339.441
-2.37495	339.243		-2.3148	339.478
-2.35732	339.496		-2.29681	339.98
-2.34039	339.829		-2.27953	339.986
-2.32411	340.008		-2.2629	339.993
-2.30842	341.009		-2.24688	340.035
-2.29327	341.026		-2.23141	340.494
-2.27864	341.352		-2.21646	340.55
-2.26448	341.407		-2.20199	340.573
-2.25076	341.408		-2.18797	340.624
-2.23745	341.647		-2.17436	340.724
-2.22453	341.933		-2.16115	340.753
-2.21196	342.233		-2.1483	340.773
-2.19974	342.331		-2.13579	340.81
-2.18784	342.694		-2.12362	340.875
-2.17624	342.816		-2.11175	340.965
-2.16492	342.88		-2.10017	340.975
-2.15387	342.925		-2.08886	340.995
-2.14309	343.245		-2.07782	341.048
-2.13254	343.307		-2.06702	341.06
-2.12223	343.471		-2.05646	341.142
-2.11214	343.5		-2.04612	341.244
-2.10226	343.508		-2.036	341.311
-2.09258	343.527		-2.02608	341.326
-2.08309	343.577		-2.01636	341.389
-2.07378	343.682		-2.00682	341.451
-2.06466	343.817		-1.99747	341.461
-2.0557	343.963		-1.98828	341.478
-2.0469	344.222		-1.97926	341.49
-2.03826	344.397		-1.9704	341.597
-2.02977	344.452		-1.96169	341.608
-2.02142	344.48		-1.95312	341.713
-2.01321	344.601		-1.9447	341.738
-2.00513	344.63		-1.93641	341.745
-1.99719	344.817		-1.92826	341.793
-1.98936	344.89		-1.92023	341.872
-1.98166	344.969		-1.91232	341.899
-1.97407	344.973		-1.90453	341.963
-1.9666	344.991		-1.89685	341.992
-1.95923	345.079		-1.88929	342.004
-1.95197	345.08		-1.88183	342.123
-1.94481	345.131		-1.87447	342.176
-1.93775	345.237		-1.86722	342.195
-1.93078	345.25		-1.86006	342.307
-1.92391	345.47		-1.85299	342.399
-1.91712	345.471		-1.84602	342.467
-1.91042	345.485		-1.83913	342.566
-1.90381	345.659		-1.83234	342.617
-1.89728	345.69		-1.82562	342.658
-1.89083	345.722		-1.81899	342.738
-1.88446	345.764		-1.81243	342.813
-1.87816	345.767		-1.80595	342.816
-1.87193	345.772		-1.79955	342.837
-1.86578	345.833		-1.79322	342.842
-1.8597	345.844		-1.78696	342.867
-1.85368	345.854		-1.78077	342.892
-1.84774	345.87		-1.77465	342.925
-1.84185	345.974		-1.76859	342.93
-1.83603	346.029		-1.7626	342.933
-1.83027	346.03		-1.75667	343.009
-1.82458	346.037		-1.7508	343.075
-1.81894	346.067		-1.74499	343.146
-1.81335	346.114		-1.73924	343.165
-1.80783	346.501		-1.73355	343.175
-1.80235	346.508		-1.72791	343.28
-1.79694	346.515		-1.72233	343.305
-1.79157	346.614		-1.7168	343.31
-1.78625	346.617		-1.71132	343.338
-1.78099	346.639		-1.70589	343.464
-1.77577	346.671		-1.70051	343.477
-1.7706	346.742		-1.69519	343.486
-1.76548	346.743		-1.6899	343.526
-1.76041	346.827		-1.68467	343.534
-1.75537	346.922		-1.67948	343.62
-1.75039	346.941		-1.67434	343.727
-1.74544	346.995		-1.66924	343.727
-1.74054	347.048		-1.66418	343.767
-1.73568	347.121		-1.65917	343.8
-1.73086	347.148		-1.65419	343.835
-1.72608	347.198		-1.64926	343.875
-1.72134	347.199		-1.64437	343.923
-1.71664	347.232		-1.63951	343.978
-1.71198	347.264		-1.6347	344.043
-1.70735	347.271		-1.62992	344.051
-1.70276	347.286		-1.62518	344.242
-1.6982	347.309		-1.62047	344.268
-1.69368	347.327		-1.6158	344.273
-1.6892	347.427		-1.61117	344.293
-1.68475	347.505		-1.60657	344.338
-1.68033	347.521		-1.602	344.338
-1.67594	347.626		-1.59747	344.382
-1.67159	347.748		-1.59297	344.541
-1.66726	347.822		-1.5885	344.586
-1.66297	347.861		-1.58406	344.658
-1.65871	347.909		-1.57966	344.766
-1.65448	347.91		-1.57528	344.792
-1.65027	347.949		-1.57094	344.805
-1.6461	348.033		-1.56662	344.833
-1.64196	348.107		-1.56233	344.899
-1.63784	348.237		-1.55808	344.965
-1.63375	348.327		-1.55385	344.988
-1.62969	348.339		-1.54964	345.047
-1.62565	348.344		-1.54547	345.143
-1.62164	348.374		-1.54132	345.237
-1.61766	348.408		-1.5372	345.249
-1.6137	348.475		-1.5331	345.25
-1.60977	348.534		-1.52903	345.288
-1.60586	348.588		-1.52498	345.3
-1.60198	348.601		-1.52096	345.311
-1.59812	348.626		-1.51696	345.333
-1.59428	348.659		-1.51299	345.447
-1.59047	348.722		-1.50904	345.462
-1.58668	348.776		-1.50512	345.535
-1.58291	348.8		-1.50122	345.775
-1.57917	348.803		-1.49734	345.851
-1.57544	348.814		-1.49348	345.901
-1.57174	348.861		-1.48964	345.96
-1.56806	348.877		-1.48583	345.991
-1.5644	348.948		-1.48204	346.026
-1.56077	349.034		-1.47827	346.028
-1.55715	349.039		-1.47452	346.061
-1.55355	349.308		-1.47079	346.165
-1.54998	349.401		-1.46708	346.235
-1.54642	349.448		-1.46339	346.267
-1.54288	349.472		-1.45972	346.283
-1.53936	349.495		-1.45607	346.319
-1.53586	349.567		-1.45244	346.397
-1.53238	349.627		-1.44883	346.413
-1.52892	349.649		-1.44524	346.488
-1.52548	349.665		-1.44167	346.53
-1.52205	349.724		-1.43811	346.543
-1.51864	349.791		-1.43457	346.571
-1.51525	349.827		-1.43105	346.578
-1.51188	349.893		-1.42755	346.583
-1.50852	349.912		-1.42407	346.642
-1.50518	349.929		-1.4206	346.671
-1.50186	349.955		-1.41715	346.672
-1.49855	349.97		-1.41372	346.683
-1.49526	349.994		-1.4103	346.705
-1.49199	350.015		-1.4069	346.722
-1.48873	350.175		-1.40352	346.724
-1.48549	350.21		-1.40015	346.734
-1.48226	350.287		-1.3968	346.843
-1.47905	350.391		-1.39346	347.081
-1.47585	350.434		-1.39014	347.145
-1.47267	350.536		-1.38683	347.186
-1.46951	350.544		-1.38354	347.276
-1.46636	350.546		-1.38027	347.434
-1.46322	350.593		-1.377	347.461
-1.4601	350.61		-1.37376	347.508
-1.45699	350.625		-1.37052	347.55
-1.45389	350.682		-1.36731	347.559
-1.45081	350.711		-1.3641	347.577
-1.44775	350.87		-1.36091	347.667
-1.44469	350.917		-1.35774	347.68
-1.44165	350.921		-1.35457	347.682
-1.43862	350.941		-1.35142	347.686
-1.43561	350.967		-1.34829	347.761
-1.43261	351		-1.34517	347.767
-1.42962	351.01		-1.34206	347.814
-1.42665	351.018		-1.33896	347.839
-1.42369	351.04		-1.33588	347.849
-1.42073	351.105		-1.33281	347.859
-1.4178	351.113		-1.32975	347.925
-1.41487	351.124		-1.3267	347.98
-1.41196	351.176		-1.32367	347.983
-1.40906	351.227		-1.32065	348.012
-1.40617	351.276		-1.31764	348.064
-1.40329	351.279		-1.31464	348.077
-1.40042	351.315		-1.31165	348.103
-1.39757	351.393		-1.30868	348.108
-1.39472	351.405		-1.30571	348.202
-1.39189	351.429		-1.30276	348.212
-1.38907	351.441		-1.29982	348.241
-1.38626	351.474		-1.29689	348.256
-1.38346	351.575		-1.29398	348.285
-1.38067	351.61		-1.29107	348.363
-1.37789	351.718		-1.28817	348.406
-1.37513	351.737		-1.28529	348.414
-1.37237	351.759		-1.28241	348.423
-1.36962	351.8		-1.27955	348.491
-1.36689	351.889		-1.27669	348.548
-1.36416	351.909		-1.27385	348.591
-1.36144	351.922		-1.27102	348.64
-1.35874	351.968		-1.26819	348.643
-1.35604	352.037		-1.26538	348.671
-1.35336	352.038		-1.26258	348.693
-1.35068	352.073		-1.25979	348.782
-1.34801	352.103		-1.257	348.797
-1.34536	352.139		-1.25423	348.851
-1.34271	352.208		-1.25147	348.989
-1.34007	352.247		-1.24871	349.016
-1.33744	352.263		-1.24597	349.033
-1.33482	352.292		-1.24323	349.064
-1.33221	352.352		-1.2405	349.121
-1.32961	352.361		-1.23779	349.131
-1.32702	352.386		-1.23508	349.16
-1.32443	352.429		-1.23238	349.161
-1.32186	352.491		-1.22969	349.239
-1.31929	352.503		-1.22701	349.253
-1.31673	352.535		-1.22434	349.28
-1.31418	352.545		-1.22167	349.288
-1.31164	352.566		-1.21902	349.34
-1.30911	352.571		-1.21637	349.467
-1.30659	352.583		-1.21373	349.488
-1.30407	352.589		-1.21111	349.488
-1.30157	352.601		-1.20848	349.509
-1.29907	352.615		-1.20587	349.524
-1.29658	352.697		-1.20327	349.579
-1.29409	352.699		-1.20067	349.609
-1.29162	352.719		-1.19808	349.632
-1.28915	352.747		-1.1955	349.71
-1.28669	352.75		-1.19293	349.713
-1.28424	352.754		-1.19036	349.724
-1.2818	352.755		-1.18781	349.746
-1.27936	352.779		-1.18526	349.759
-1.27693	352.859		-1.18272	349.838
-1.27451	352.905		-1.18018	349.875
-1.2721	352.95		-1.17766	349.882
-1.26969	352.952		-1.17514	349.947
-1.26729	353.003		-1.17263	349.995
-1.2649	353.021		-1.17012	350.038
-1.26251	353.028		-1.16763	350.093
-1.26014	353.056		-1.16514	350.123
-1.25777	353.062		-1.16265	350.124
-1.2554	353.087		-1.16018	350.128
-1.25305	353.102		-1.15771	350.357
-1.2507	353.115		-1.15525	350.372
-1.24836	353.131		-1.1528	350.38
-1.24602	353.159		-1.15035	350.438
-1.24369	353.165		-1.14791	350.448
-1.24137	353.181		-1.14548	350.452
-1.23905	353.183		-1.14305	350.491
-1.23675	353.205		-1.14063	350.529
-1.23444	353.229		-1.13822	350.548
-1.23215	353.24		-1.13581	350.583
-1.22986	353.24		-1.13341	350.585
-1.22758	353.275		-1.13102	350.615
-1.2253	353.287		-1.12863	350.667
-1.22303	353.29		-1.12625	350.7
-1.22077	353.322		-1.12387	350.718
-1.21851	353.324		-1.12151	350.719
-1.21626	353.336		-1.11914	350.748
-1.21401	353.355		-1.11679	350.75
-1.21177	353.395		-1.11444	350.78
-1.20954	353.477		-1.1121	350.788
-1.20731	353.484		-1.10976	350.808
-1.20509	353.495		-1.10743	350.857
-1.20288	353.501		-1.1051	350.864
-1.20067	353.518		-1.10278	350.873
-1.19846	353.522		-1.10047	350.891
-1.19627	353.562		-1.09816	350.91
-1.19408	353.591		-1.09586	350.964
-1.19189	353.599		-1.09357	351.005
-1.18971	353.599		-1.09128	351.013
-1.18753	353.624		-1.08899	351.032
-1.18536	353.634		-1.08671	351.038
-1.1832	353.683		-1.08444	351.05
-1.18104	353.687		-1.08217	351.059
-1.17889	353.747		-1.07991	351.1
-1.17674	353.757		-1.07766	351.132
-1.1746	353.778		-1.07541	351.141
-1.17247	353.825		-1.07316	351.148
-1.17033	353.889		-1.07092	351.154
-1.16821	353.914		-1.06869	351.163
-1.16609	353.949		-1.06646	351.217
-1.16397	353.989		-1.06423	351.226
-1.16186	354.017		-1.06201	351.236
-1.15976	354.025		-1.0598	351.24
-1.15766	354.026		-1.05759	351.254
-1.15556	354.028		-1.05539	351.268
-1.15347	354.099		-1.05319	351.301
-1.15139	354.113		-1.051	351.302
-1.14931	354.148		-1.04881	351.349
-1.14724	354.15		-1.04663	351.359
-1.14517	354.159		-1.04445	351.361
-1.1431	354.199		-1.04228	351.377
-1.14104	354.204		-1.04011	351.383
-1.13899	354.216		-1.03794	351.462
-1.13694	354.217		-1.03579	351.477
-1.13489	354.256		-1.03363	351.515
-1.13285	354.264		-1.03148	351.533
-1.13081	354.327		-1.02934	351.571
-1.12878	354.328		-1.0272	351.588
-1.12676	354.366		-1.02507	351.593
-1.12473	354.383		-1.02294	351.594
-1.12272	354.392		-1.02081	351.603
-1.1207	354.394		-1.01869	351.611
-1.11869	354.394		-1.01657	351.723
-1.11669	354.418		-1.01446	351.749
-1.11469	354.462		-1.01236	351.831
-1.1127	354.467		-1.01025	351.846
-1.11071	354.471		-1.00815	351.876
-1.10872	354.475		-1.00606	351.877
-1.10674	354.498		-1.00397	351.956
-1.10476	354.553		-1.00189	351.975
-1.10279	354.562		-0.999806	351.988
-1.10082	354.589		-0.99773	352.02
-1.09885	354.594		-0.995658	352.075
-1.09689	354.627		-0.99359	352.111
-1.09494	354.638		-0.991526	352.16
-1.09298	354.655		-0.989467	352.213
-1.09104	354.703		-0.987412	352.215
-1.08909	354.712		-0.985361	352.218
-1.08715	354.757		-0.983314	352.277
-1.08522	354.795		-0.981272	352.329
-1.08329	354.813		-0.979233	352.354
-1.08136	354.899		-0.977199	352.366
-1.07944	354.986		-0.975168	352.401
-1.07752	354.99		-0.973142	352.433
-1.0756	355.011		-0.971119	352.444
-1.07369	355.029		-0.969101	352.476
-1.07178	355.037		-0.967086	352.479
-1.06988	355.045		-0.965075	352.489
-1.06798	355.118		-0.963069	352.5
-1.06608	355.126		-0.961066	352.508
-1.06419	355.144		-0.959067	352.565
-1.0623	355.145		-0.957071	352.575
-1.06042	355.184		-0.95508	352.597
-1.05853	355.195		-0.953092	352.615
-1.05666	355.195		-0.951109	352.621
-1.05478	355.222		-0.949128	352.632
-1.05291	355.229		-0.947152	352.732
-1.05105	355.286		-0.945179	352.78
-1.04919	355.294		-0.94321	352.826
-1.04733	355.298		-0.941245	352.83
-1.04547	355.299		-0.939283	352.852
-1.04362	355.324		-0.937325	352.852
-1.04177	355.335		-0.93537	352.878
-1.03993	355.372		-0.933419	352.922
-1.03809	355.408		-0.931472	352.978
-1.03625	355.414		-0.929528	352.988
-1.03442	355.416		-0.927587	353.004
-1.03259	355.447		-0.92565	353.043
-1.03076	355.496		-0.923717	353.043
-1.02893	355.498		-0.921787	353.074
-1.02711	355.529		-0.91986	353.075
-1.0253	355.53		-0.917937	353.093
-1.02348	355.536		-0.916017	353.116
-1.02167	355.559		-0.914101	353.132
-1.01987	355.603		-0.912188	353.144
-1.01806	355.611		-0.910278	353.152
-1.01626	355.633		-0.908371	353.154
-1.01447	355.644		-0.906468	353.161
-1.01267	355.645		-0.904568	353.162
-1.01088	355.652		-0.902672	353.165
-1.0091	355.676		-0.900778	353.166
-1.00731	355.678		-0.898888	353.212
-1.00553	355.686		-0.897001	353.236
-1.00376	355.699		-0.895117	353.241
-1.00198	355.707		-0.893237	353.267
-1.00021	355.712		-0.891359	353.336
-0.998442	355.743		-0.889485	353.361
-0.996677	355.758		-0.887614	353.378
-0.994915	355.758		-0.885746	353.425
-0.993157	355.804		-0.883881	353.5
-0.991401	355.815		-0.882019	353.543
-0.989649	355.846		-0.88016	353.551
-0.987899	355.855		-0.878304	353.552
-0.986153	355.91		-0.876451	353.585
-0.984409	355.937		-0.874602	353.593
-0.982669	355.947		-0.872755	353.629
-0.980931	355.965		-0.870911	353.632
-0.979197	355.971		-0.86907	353.675
-0.977465	355.982		-0.867232	353.677
-0.975736	355.986		-0.865397	353.699
-0.97401	356		-0.863565	353.708
-0.972288	356.014		-0.861736	353.758
-0.970567	356.027		-0.859909	353.766
-0.96885	356.048		-0.858086	353.795
-0.967136	356.053		-0.856265	353.819
-0.965425	356.088		-0.854447	353.903
-0.963716	356.089		-0.852632	353.926
-0.96201	356.091		-0.85082	353.934
-0.960307	356.186		-0.849011	353.987
-0.958607	356.192		-0.847204	354.012
-0.956909	356.244		-0.8454	354.032
-0.955215	356.255		-0.843599	354.042
-0.953523	356.263		-0.841801	354.054
-0.951833	356.281		-0.840005	354.061
-0.950147	356.284		-0.838212	354.071
-0.948463	356.285		-0.836422	354.079
-0.946782	356.315		-0.834634	354.084
-0.945103	356.36		-0.83285	354.108
-0.943427	356.392		-0.831067	354.128
-0.941754	356.416		-0.829288	354.13
-0.940084	356.421		-0.827511	354.153
-0.938416	356.423		-0.825736	354.181
-0.93675	356.426		-0.823964	354.187
-0.935088	356.432		-0.822195	354.191
-0.933427	356.438		-0.820429	354.196
-0.93177	356.566		-0.818664	354.244
-0.930115	356.571		-0.816903	354.259
-0.928462	356.599		-0.815144	354.264
-0.926812	356.607		-0.813387	354.279
-0.925165	356.644		-0.811633	354.292
-0.92352	356.654		-0.809882	354.318
-0.921878	356.657		-0.808133	354.32
-0.920238	356.665		-0.806386	354.336
-0.9186	356.729		-0.804642	354.34
-0.916965	356.771		-0.802901	354.365
-0.915332	356.785		-0.801161	354.469
-0.913702	356.836		-0.799425	354.491
-0.912075	356.848		-0.79769	354.532
-0.910449	356.867		-0.795958	354.548
-0.908826	356.87		-0.794229	354.549
-0.907206	356.87		-0.792501	354.581
-0.905588	356.875		-0.790776	354.645
-0.903972	356.881		-0.789054	354.737
-0.902359	356.885		-0.787334	354.78
-0.900747	356.889		-0.785616	354.792
-0.899139	356.893		-0.7839	354.799
-0.897532	356.911		-0.782187	354.805
-0.895928	356.944		-0.780476	354.816
-0.894326	356.958		-0.778767	354.84
-0.892727	356.982		-0.777061	354.935
-0.89113	356.995		-0.775357	354.974
-0.889535	357.004		-0.773655	354.975
-0.887942	357.008		-0.771955	354.983
-0.886352	357.035		-0.770258	355.012
-0.884763	357.046		-0.768563	355.013
-0.883177	357.064		-0.76687	355.015
-0.881594	357.072		-0.765179	355.027
-0.880012	357.086		-0.76349	355.028
-0.878433	357.123		-0.761804	355.048
-0.876856	357.123		-0.76012	355.053
-0.875281	357.142		-0.758437	355.072
-0.873708	357.174		-0.756757	355.101
-0.872137	357.183		-0.75508	355.102
-0.870569	357.211		-0.753404	355.123
-0.869002	357.211		-0.75173	355.15
-0.867438	357.266		-0.750059	355.15
-0.865876	357.275		-0.748389	355.213
-0.864316	357.311		-0.746722	355.222
-0.862758	357.414		-0.745057	355.236
-0.861202	357.415		-0.743394	355.253
-0.859648	357.438		-0.741732	355.262
-0.858097	357.447		-0.740073	355.33
-0.856547	357.485		-0.738416	355.333
-0.855	357.5		-0.736761	355.352
-0.853454	357.516		-0.735108	355.368
-0.851911	357.517		-0.733457	355.379
-0.850369	357.518		-0.731808	355.427
-0.84883	357.523		-0.730161	355.45
-0.847292	357.53		-0.728516	355.456
-0.845757	357.542		-0.726873	355.487
-0.844224	357.55		-0.725232	355.489
-0.842692	357.558		-0.723593	355.495
-0.841163	357.562		-0.721955	355.499
-0.839635	357.564		-0.72032	355.506
-0.83811	357.574		-0.718687	355.513
-0.836586	357.597		-0.717055	355.532
-0.835064	357.613		-0.715426	355.646
-0.833545	357.625		-0.713798	355.656
-0.832027	357.667		-0.712172	355.672
-0.830511	357.674		-0.710548	355.681
-0.828997	357.694		-0.708926	355.689
-0.827485	357.697		-0.707306	355.695
-0.825975	357.721		-0.705688	355.701
-0.824466	357.744		-0.704071	355.72
-0.82296	357.749		-0.702457	355.758
-0.821455	357.766		-0.700844	355.764
-0.819953	357.792		-0.699233	355.796
-0.818452	357.877		-0.697624	355.803
-0.816953	357.883		-0.696016	355.862
-0.815455	357.905		-0.694411	355.912
-0.81396	357.933		-0.692807	355.949
-0.812467	357.937		-0.691205	355.965
-0.810975	357.96		-0.689605	355.978
-0.809485	357.964		-0.688006	356.033
-0.807997	357.965		-0.68641	356.054
-0.80651	358.02		-0.684815	356.061
-0.805026	358.026		-0.683222	356.08
-0.803543	358.028		-0.68163	356.099
-0.802062	358.067		-0.68004	356.14
-0.800583	358.082		-0.678452	356.155
-0.799105	358.11		-0.676866	356.169
-0.797629	358.113		-0.675281	356.212
-0.796155	358.117		-0.673698	356.222
-0.794683	358.118		-0.672117	356.224
-0.793212	358.119		-0.670538	356.243
-0.791743	358.122		-0.66896	356.253
-0.790276	358.144		-0.667384	356.284
-0.788811	358.145		-0.665809	356.301
-0.787347	358.154		-0.664236	356.335
-0.785885	358.157		-0.662665	356.342
-0.784424	358.159		-0.661095	356.352
-0.782966	358.174		-0.659527	356.38
-0.781509	358.18		-0.657961	356.444
-0.780053	358.186		-0.656396	356.454
-0.778599	358.219		-0.654833	356.47
-0.777147	358.239		-0.653271	356.502
-0.775697	358.258		-0.651711	356.523
-0.774248	358.281		-0.650153	356.544
-0.772801	358.296		-0.648596	356.55
-0.771355	358.314		-0.647041	356.561
-0.769911	358.329		-0.645487	356.594
-0.768468	358.404		-0.643935	356.62
-0.767028	358.41		-0.642384	356.63
-0.765588	358.414		-0.640835	356.643
-0.764151	358.419		-0.639288	356.644
-0.762715	358.45		-0.637742	356.704
-0.76128	358.488		-0.636197	356.706
-0.759847	358.489		-0.634654	356.75
-0.758416	358.495		-0.633113	356.754
-0.756986	358.502		-0.631573	356.763
-0.755558	358.503		-0.630034	356.775
-0.754131	358.503		-0.628498	356.777
-0.752706	358.513		-0.626962	356.793
-0.751282	358.519		-0.625428	356.822
-0.74986	358.546		-0.623896	356.824
-0.748439	358.55		-0.622365	356.855
-0.74702	358.567		-0.620835	356.868
-0.745603	358.584		-0.619307	356.868
-0.744186	358.648		-0.61778	356.87
-0.742772	358.65		-0.616255	356.874
-0.741359	358.653		-0.614731	356.877
-0.739947	358.683		-0.613209	356.889
-0.738537	358.698		-0.611688	356.902
-0.737128	358.7		-0.610168	356.905
-0.735721	358.703		-0.60865	356.936
-0.734315	358.718		-0.607133	356.943
-0.732911	358.728		-0.605618	356.945
-0.731508	358.731		-0.604104	356.965
-0.730106	358.742		-0.602591	357.035
-0.728706	358.784		-0.60108	357.039
-0.727307	358.785		-0.59957	357.065
-0.72591	358.794		-0.598062	357.067
-0.724514	358.81		-0.596555	357.098
-0.72312	358.85		-0.595049	357.107
-0.721727	358.862		-0.593544	357.146
-0.720335	358.873		-0.592041	357.151
-0.718945	358.877		-0.59054	357.224
-0.717556	358.887		-0.589039	357.305
-0.716169	358.924		-0.58754	357.307
-0.714783	358.929		-0.586042	357.31
-0.713398	358.942		-0.584546	357.313
-0.712015	358.953		-0.583051	357.344
-0.710633	358.958		-0.581557	357.356
-0.709252	358.978		-0.580064	357.373
-0.707873	358.979		-0.578573	357.4
-0.706495	358.981		-0.577083	357.419
-0.705119	358.983		-0.575594	357.459
-0.703744	358.988		-0.574107	357.466
-0.70237	359.011		-0.572621	357.47
-0.700997	359.015		-0.571136	357.492
-0.699626	359.029		-0.569652	357.506
-0.698256	359.037		-0.56817	357.51
-0.696887	359.041		-0.566689	357.524
-0.69552	359.058		-0.565209	357.527
-0.694154	359.086		-0.56373	357.535
-0.692789	359.105		-0.562253	357.539
-0.691426	359.111		-0.560777	357.543
-0.690064	359.118		-0.559302	357.563
-0.688703	359.124		-0.557828	357.57
-0.687343	359.131		-0.556356	357.571
-0.685985	359.131		-0.554884	357.584
-0.684628	359.147		-0.553414	357.584
-0.683272	359.151		-0.551945	357.621
-0.681918	359.158		-0.550477	357.627
-0.680564	359.19		-0.549011	357.634
-0.679212	359.194		-0.547545	357.641
-0.677861	359.206		-0.546081	357.642
-0.676512	359.208		-0.544618	357.652
-0.675163	359.243		-0.543156	357.663
-0.673816	359.25		-0.541696	357.664
-0.67247	359.257		-0.540236	357.67
-0.671126	359.267		-0.538778	357.69
-0.669782	359.267		-0.53732	357.707
-0.66844	359.268		-0.535864	357.74
-0.667099	359.273		-0.534409	357.74
-0.665759	359.303		-0.532955	357.751
-0.66442	359.306		-0.531503	357.753
-0.663083	359.321		-0.530051	357.753
-0.661747	359.33		-0.528601	357.763
-0.660412	359.345		-0.527151	357.769
-0.659078	359.362		-0.525703	357.775
-0.657745	359.365		-0.524256	357.81
-0.656413	359.426		-0.52281	357.812
-0.655083	359.449		-0.521365	357.845
-0.653754	359.47		-0.519921	357.845
-0.652426	359.483		-0.518478	357.866
-0.651099	359.503		-0.517036	357.87
-0.649773	359.547		-0.515596	357.886
-0.648448	359.551		-0.514156	357.949
-0.647125	359.575		-0.512718	357.961
-0.645802	359.601		-0.51128	357.964
-0.644481	359.605		-0.509844	357.966
-0.643161	359.616		-0.508408	357.972
-0.641842	359.617		-0.506974	358
-0.640524	359.638		-0.505541	358.002
-0.639207	359.656		-0.504109	358.038
-0.637891	359.669		-0.502677	358.05
-0.636577	359.679		-0.501247	358.052
-0.635263	359.701		-0.499818	358.062
-0.633951	359.703		-0.49839	358.064
-0.632639	359.715		-0.496963	358.087
-0.631329	359.72		-0.495537	358.092
-0.63002	359.722		-0.494112	358.111
-0.628712	359.722		-0.492688	358.113
-0.627405	359.733		-0.491264	358.123
-0.626099	359.781		-0.489842	358.143
-0.624794	359.785		-0.488421	358.144
-0.62349	359.794		-0.487001	358.146
-0.622188	359.797		-0.485582	358.147
-0.620886	359.797		-0.484164	358.158
-0.619585	359.812		-0.482747	358.164
-0.618286	359.837		-0.48133	358.172
-0.616987	359.839		-0.479915	358.182
-0.61569	359.914		-0.478501	358.197
-0.614393	359.933		-0.477088	358.232
-0.613098	359.943		-0.475675	358.241
-0.611803	359.949		-0.474264	358.245
-0.61051	359.963		-0.472853	358.261
-0.609218	360.004		-0.471444	358.303
-0.607926	360.009		-0.470035	358.307
-0.606636	360.015		-0.468627	358.332
-0.605347	360.037		-0.467221	358.344
-0.604058	360.04		-0.465815	358.391
-0.602771	360.042		-0.46441	358.406
-0.601485	360.095		-0.463006	358.414
-0.600199	360.103		-0.461603	358.428
-0.598915	360.111		-0.460201	358.446
-0.597632	360.119		-0.458799	358.463
-0.596349	360.123		-0.457399	358.476
-0.595068	360.125		-0.455999	358.48
-0.593788	360.126		-0.454601	358.487
-0.592508	360.128		-0.453203	358.504
-0.59123	360.131		-0.451806	358.511
-0.589952	360.158		-0.45041	358.519
-0.588676	360.195		-0.449015	358.523
-0.5874	360.244		-0.447621	358.554
-0.586126	360.263		-0.446228	358.558
-0.584852	360.289		-0.444836	358.558
-0.583579	360.342		-0.443444	358.558
-0.582307	360.349		-0.442053	358.558
-0.581037	360.36		-0.440663	358.565
-0.579767	360.389		-0.439274	358.615
-0.578498	360.42		-0.437886	358.631
-0.57723	360.42		-0.436499	358.645
-0.575963	360.445		-0.435112	358.678
-0.574696	360.47		-0.433727	358.678
-0.573431	360.477		-0.432342	358.704
-0.572167	360.478		-0.430958	358.706
-0.570903	360.495		-0.429575	358.708
-0.569641	360.499		-0.428192	358.735
-0.568379	360.513		-0.426811	358.752
-0.567119	360.526		-0.42543	358.775
-0.565859	360.528		-0.42405	358.786
-0.5646	360.529		-0.422671	358.809
-0.563342	360.579		-0.421293	358.832
-0.562085	360.59		-0.419915	358.886
-0.560829	360.595		-0.418539	358.907
-0.559573	360.613		-0.417163	358.915
-0.558319	360.624		-0.415788	358.917
-0.557065	360.632		-0.414413	358.925
-0.555812	360.634		-0.41304	358.959
-0.554561	360.645		-0.411667	358.98
-0.55331	360.67		-0.410295	359.004
-0.55206	360.69		-0.408924	359.03
-0.55081	360.691		-0.407553	359.033
-0.549562	360.7		-0.406184	359.059
-0.548314	360.703		-0.404815	359.068
-0.547068	360.727		-0.403447	359.068
-0.545822	360.732		-0.402079	359.086
-0.544577	360.758		-0.400713	359.127
-0.543333	360.759		-0.399347	359.139
-0.54209	360.78		-0.397981	359.145
-0.540847	360.78		-0.396617	359.151
-0.539605	360.831		-0.395253	359.154
-0.538365	360.856		-0.39389	359.165
-0.537125	360.863		-0.392528	359.198
-0.535886	360.897		-0.391167	359.2
-0.534647	360.9		-0.389806	359.216
-0.53341	360.909		-0.388446	359.223
-0.532173	360.951		-0.387087	359.229
-0.530937	360.951		-0.385728	359.284
-0.529702	360.952		-0.38437	359.325
-0.528468	360.971		-0.383013	359.33
-0.527234	360.979		-0.381656	359.374
-0.526002	360.988		-0.380301	359.411
-0.52477	361.012		-0.378945	359.428
-0.523539	361.014		-0.377591	359.441
-0.522309	361.015		-0.376237	359.455
-0.521079	361.025		-0.374884	359.456
-0.51985	361.025		-0.373532	359.465
-0.518623	361.046		-0.37218	359.471
-0.517395	361.047		-0.370829	359.484
-0.516169	361.093		-0.369479	359.542
-0.514944	361.117		-0.36813	359.542
-0.513719	361.121		-0.366781	359.561
-0.512495	361.124		-0.365432	359.605
-0.511271	361.137		-0.364085	359.61
-0.510049	361.137		-0.362738	359.611
-0.508827	361.143		-0.361391	359.625
-0.507606	361.151		-0.360046	359.634
-0.506386	361.168		-0.358701	359.638
-0.505167	361.183		-0.357356	359.642
-0.503948	361.199		-0.356013	359.654
-0.50273	361.202		-0.35467	359.657
-0.501513	361.213		-0.353327	359.704
-0.500296	361.221		-0.351986	359.722
-0.499081	361.237		-0.350644	359.793
-0.497866	361.254		-0.349304	359.854
-0.496651	361.283		-0.347964	359.86
-0.495438	361.33		-0.346625	359.866
-0.494225	361.337		-0.345286	359.885
-0.493013	361.339		-0.343948	359.888
-0.491802	361.359		-0.342611	359.89
-0.490591	361.378		-0.341274	359.895
-0.489381	361.38		-0.339938	359.902
-0.488172	361.386		-0.338602	359.938
-0.486963	361.407		-0.337267	359.955
-0.485756	361.418		-0.335933	359.986
-0.484549	361.424		-0.334599	359.996
-0.483342	361.43		-0.333266	360.022
-0.482137	361.436		-0.331933	360.056
-0.480932	361.455		-0.330601	360.085
-0.479727	361.488		-0.32927	360.094
-0.478524	361.545		-0.327939	360.101
-0.477321	361.561		-0.326609	360.122
-0.476119	361.565		-0.325279	360.135
-0.474917	361.579		-0.32395	360.137
-0.473717	361.587		-0.322622	360.138
-0.472516	361.592		-0.321294	360.139
-0.471317	361.594		-0.319966	360.172
-0.470118	361.648		-0.318639	360.213
-0.46892	361.653		-0.317313	360.216
-0.467723	361.672		-0.315987	360.219
-0.466526	361.68		-0.314662	360.227
-0.46533	361.682		-0.313338	360.252
-0.464135	361.7		-0.312014	360.258
-0.46294	361.7		-0.31069	360.262
-0.461746	361.708		-0.309367	360.282
-0.460552	361.748		-0.308045	360.295
-0.459359	361.748		-0.306723	360.309
-0.458167	361.752		-0.305402	360.31
-0.456976	361.765		-0.304081	360.335
-0.455785	361.766		-0.30276	360.358
-0.454595	361.769		-0.301441	360.401
-0.453405	361.799		-0.300121	360.411
-0.452217	361.803		-0.298803	360.444
-0.451028	361.805		-0.297485	360.447
-0.449841	361.824		-0.296167	360.459
-0.448654	361.839		-0.29485	360.52
-0.447467	361.84		-0.293533	360.534
-0.446282	361.852		-0.292217	360.542
-0.445097	361.865		-0.290901	360.542
-0.443912	361.876		-0.289586	360.549
-0.442728	361.896		-0.288272	360.56
-0.441545	361.899		-0.286957	360.596
-0.440362	361.9		-0.285644	360.597
-0.43918	361.924		-0.284331	360.601
-0.437999	361.927		-0.283018	360.621
-0.436818	361.946		-0.281706	360.621
-0.435638	361.96		-0.280394	360.625
-0.434459	361.963		-0.279083	360.625
-0.43328	361.977		-0.277772	360.647
-0.432101	361.983		-0.276462	360.66
-0.430924	362		-0.275152	360.66
-0.429746	362		-0.273843	360.67
-0.42857	362.023		-0.272534	360.675
-0.427394	362.072		-0.271226	360.707
-0.426219	362.108		-0.269918	360.732
-0.425044	362.124		-0.268611	360.764
-0.42387	362.173		-0.267304	360.775
-0.422696	362.189		-0.265997	360.78
-0.421523	362.205		-0.264691	360.8
-0.42035	362.208		-0.263385	360.827
-0.419179	362.214		-0.26208	360.845
-0.418007	362.22		-0.260776	360.852
-0.416837	362.22		-0.259471	360.861
-0.415666	362.222		-0.258167	360.864
-0.414497	362.235		-0.256864	360.865
-0.413328	362.237		-0.255561	360.905
-0.412159	362.265		-0.254259	360.91
-0.410992	362.274		-0.252957	360.923
-0.409824	362.274		-0.251655	360.925
-0.408657	362.275		-0.250354	360.927
-0.407491	362.281		-0.249053	360.958
-0.406326	362.308		-0.247752	360.959
-0.40516	362.316		-0.246452	360.965
-0.403996	362.32		-0.245153	360.973
-0.402832	362.336		-0.243854	361
-0.401668	362.35		-0.242555	361.006
-0.400505	362.353		-0.241257	361.016
-0.399343	362.357		-0.239959	361.018
-0.398181	362.359		-0.238661	361.03
-0.39702	362.37		-0.237364	361.042
-0.395859	362.378		-0.236068	361.054
-0.394699	362.379		-0.234771	361.056
-0.393539	362.398		-0.233475	361.066
-0.39238	362.409		-0.23218	361.091
-0.391221	362.417		-0.230885	361.1
-0.390063	362.424		-0.22959	361.109
-0.388906	362.436		-0.228296	361.128
-0.387749	362.44		-0.227002	361.183
-0.386592	362.457		-0.225708	361.189
-0.385436	362.473		-0.224415	361.194
-0.384281	362.494		-0.223122	361.2
-0.383126	362.518		-0.221829	361.214
-0.381971	362.529		-0.220537	361.236
-0.380817	362.535		-0.219246	361.255
-0.379664	362.536		-0.217954	361.261
-0.378511	362.537		-0.216663	361.304
-0.377358	362.543		-0.215373	361.304
-0.376206	362.545		-0.214082	361.318
-0.375055	362.562		-0.212792	361.366
-0.373904	362.564		-0.211503	361.371
-0.372753	362.566		-0.210214	361.377
-0.371603	362.568		-0.208925	361.38
-0.370454	362.589		-0.207636	361.411
-0.369305	362.59		-0.206348	361.455
-0.368156	362.613		-0.20506	361.458
-0.367008	362.617		-0.203773	361.461
-0.36586	362.622		-0.202485	361.469
-0.364713	362.63		-0.201199	361.479
-0.363567	362.656		-0.199912	361.481
-0.362421	362.661		-0.198626	361.483
-0.361275	362.667		-0.19734	361.495
-0.36013	362.675		-0.196055	361.5
-0.358985	362.693		-0.194769	361.504
-0.357841	362.716		-0.193485	361.529
-0.356697	362.743		-0.1922	361.543
-0.355554	362.771		-0.190916	361.545
-0.354411	362.798		-0.189632	361.555
-0.353269	362.809		-0.188348	361.566
-0.352127	362.811		-0.187065	361.569
-0.350985	362.819		-0.185782	361.584
-0.349844	362.876		-0.184499	361.585
-0.348704	362.878		-0.183217	361.591
-0.347564	362.88		-0.181935	361.613
-0.346424	362.889		-0.180653	361.634
-0.345285	362.911		-0.179372	361.637
-0.344146	362.916		-0.17809	361.644
-0.343008	362.916		-0.17681	361.664
-0.34187	362.92		-0.175529	361.691
-0.340733	362.927		-0.174249	361.701
-0.339596	362.942		-0.172969	361.704
-0.338459	362.945		-0.171689	361.711
-0.337323	362.949		-0.170409	361.713
-0.336188	362.969		-0.16913	361.737
-0.335052	362.992		-0.167851	361.754
-0.333918	363.007		-0.166573	361.762
-0.332783	363.029		-0.165294	361.763
-0.331649	363.04		-0.164016	361.777
-0.330516	363.058		-0.162738	361.791
-0.329383	363.074		-0.161461	361.797
-0.32825	363.079		-0.160184	361.801
-0.327118	363.103		-0.158907	361.811
-0.325986	363.121		-0.15763	361.839
-0.324855	363.129		-0.156353	361.853
-0.323724	363.138		-0.155077	361.859
-0.322593	363.184		-0.153801	361.861
-0.321463	363.202		-0.152525	361.875
-0.320333	363.216		-0.15125	361.879
-0.319204	363.22		-0.149975	361.912
-0.318075	363.224		-0.1487	361.917
-0.316946	363.256		-0.147425	361.934
-0.315818	363.271		-0.14615	361.964
-0.314691	363.296		-0.144876	361.981
-0.313563	363.305		-0.143602	361.984
-0.312436	363.313		-0.142328	362.03
-0.31131	363.331		-0.141054	362.042
-0.310184	363.349		-0.139781	362.054
-0.309058	363.359		-0.138508	362.067
-0.307933	363.37		-0.137235	362.072
-0.306808	363.373		-0.135962	362.075
-0.305683	363.395		-0.13469	362.076
-0.304559	363.407		-0.133418	362.088
-0.303435	363.413		-0.132145	362.137
-0.302312	363.417		-0.130874	362.137
-0.301189	363.423		-0.129602	362.17
-0.300066	363.423		-0.128331	362.175
-0.298944	363.454		-0.127059	362.179
-0.297822	363.461		-0.125788	362.189
-0.2967	363.463		-0.124518	362.22
-0.295579	363.463		-0.123247	362.234
-0.294459	363.49		-0.121977	362.261
-0.293338	363.491		-0.120706	362.273
-0.292218	363.532		-0.119436	362.295
-0.291098	363.55		-0.118167	362.298
-0.289979	363.556		-0.116897	362.3
-0.28886	363.575		-0.115628	362.305
-0.287742	363.591		-0.114358	362.306
-0.286623	363.598		-0.113089	362.313
-0.285506	363.61		-0.11182	362.35
-0.284388	363.674		-0.110552	362.362
-0.283271	363.68		-0.109283	362.368
-0.282154	363.695		-0.108015	362.372
-0.281038	363.695		-0.106747	362.387
-0.279922	363.704		-0.105479	362.441
-0.278806	363.753		-0.104211	362.471
-0.27769	363.763		-0.102943	362.475
-0.276575	363.769		-0.101676	362.478
-0.275461	363.77		-0.100408	362.524
-0.274346	363.803		-0.0991412	362.529
-0.273232	363.811		-0.0978742	362.533
-0.272119	363.84		-0.0966073	362.54
-0.271005	363.858		-0.0953406	362.567
-0.269892	363.885		-0.0940741	362.575
-0.26878	363.894		-0.0928077	362.591
-0.267667	363.899		-0.0915414	362.63
-0.266555	363.902		-0.0902753	362.634
-0.265444	363.915		-0.0890094	362.652
-0.264332	363.921		-0.0877436	362.678
-0.263221	363.931		-0.0864779	362.707
-0.26211	363.974		-0.0852124	362.714
-0.261	363.979		-0.083947	362.73
-0.25989	363.983		-0.0826817	362.75
-0.25878	364.051		-0.0814166	362.751
-0.257671	364.055		-0.0801516	362.754
-0.256562	364.076		-0.0788867	362.773
-0.255453	364.079		-0.077622	362.79
-0.254344	364.085		-0.0763573	362.794
-0.253236	364.124		-0.0750928	362.802
-0.252128	364.128		-0.0738285	362.812
-0.251021	364.166		-0.0725642	362.828
-0.249914	364.174		-0.0713001	362.836
-0.248807	364.174		-0.070036	362.869
-0.2477	364.183		-0.0687721	362.87
-0.246594	364.19		-0.0675083	362.89
-0.245488	364.255		-0.0662446	362.952
-0.244382	364.256		-0.064981	362.965
-0.243277	364.268		-0.0637175	363
-0.242172	364.269		-0.0624541	363.011
-0.241067	364.283		-0.0611908	363.017
-0.239962	364.294		-0.0599276	363.021
-0.238858	364.308		-0.0586645	363.04
-0.237754	364.323		-0.0574015	363.043
-0.23665	364.336		-0.0561386	363.044
-0.235547	364.358		-0.0548758	363.05
-0.234444	364.381		-0.053613	363.052
-0.233341	364.4		-0.0523504	363.057
-0.232239	364.407		-0.0510878	363.059
-0.231136	364.423		-0.0498253	363.059
-0.230034	364.45		-0.0485629	363.069
-0.228933	364.454		-0.0473006	363.089
-0.227831	364.472		-0.0460384	363.106
-0.22673	364.479		-0.0447762	363.106
-0.225629	364.485		-0.0435141	363.116
-0.224529	364.488		-0.042252	363.117
-0.223428	364.527		-0.0409901	363.129
-0.222328	364.527		-0.0397281	363.132
-0.221229	364.532		-0.0384663	363.154
-0.220129	364.55		-0.0372045	363.161
-0.21903	364.567		-0.0359428	363.168
-0.217931	364.573		-0.0346811	363.223
-0.216832	364.577		-0.0334195	363.227
-0.215734	364.604		-0.032158	363.228
-0.214636	364.612		-0.0308965	363.248
-0.213538	364.62		-0.029635	363.26
-0.21244	364.626		-0.0283736	363.262
-0.211343	364.645		-0.0271122	363.263
-0.210246	364.65		-0.0258509	363.266
-0.209149	364.672		-0.0245896	363.272
-0.208052	364.677		-0.0233284	363.308
-0.206956	364.68		-0.0220672	363.309
-0.205859	364.684		-0.020806	363.31
-0.204764	364.693		-0.0195449	363.335
-0.203668	364.755		-0.0182838	363.374
-0.202573	364.763		-0.0170227	363.38
-0.201477	364.767		-0.0157616	363.396
-0.200382	364.769		-0.0145006	363.405
-0.199288	364.796		-0.0132396	363.432
-0.198193	364.803		-0.0119786	363.434
-0.197099	364.809		-0.0107177	363.438
-0.196005	364.872		-0.00945674	363.443
-0.194911	364.876		-0.00819581	363.443
-0.193818	364.877		-0.00693489	363.456
-0.192725	364.897		-0.00567399	363.459
-0.191632	364.903		-0.00441309	363.472
-0.190539	364.915		-0.0031522	363.498
-0.189446	364.945		-0.00189132	363.499
-0.188354	364.978		-0.00063044	363.5
-0.187262	364.986		0.00063044	363.512
-0.18617	365.037		0.00189132	363.52
-0.185078	365.037		0.0031522	363.522
-0.183987	365.045		0.00441309	363.527
-0.182895	365.046		0.00567399	363.576
-0.181804	365.067		0.00693489	363.58
-0.180713	365.072		0.00819581	363.613
-0.179623	365.118		0.00945674	363.621
-0.178533	365.123		0.0107177	363.625
-0.177442	365.137		0.0119786	363.638
-0.176352	365.148		0.0132396	363.643
-0.175263	365.164		0.0145006	363.675
-0.174173	365.201		0.0157616	363.684
-0.173084	365.234		0.0170227	363.705
-0.171995	365.243		0.0182838	363.735
-0.170906	365.256		0.0195449	363.763
-0.169817	365.274		0.020806	363.764
-0.168728	365.296		0.0220672	363.768
-0.16764	365.308		0.0233284	363.779
-0.166552	365.311		0.0245896	363.785
-0.165464	365.318		0.0258509	363.812
-0.164376	365.319		0.0271122	363.835
-0.163289	365.405		0.0283736	363.851
-0.162201	365.405		0.029635	363.874
-0.161114	365.422		0.0308965	363.883
-0.160027	365.429		0.032158	363.917
-0.15894	365.437		0.0334195	363.923
-0.157854	365.439		0.0346811	363.93
-0.156768	365.442		0.0359428	363.936
-0.155681	365.444		0.0372045	363.945
-0.154595	365.446		0.0384663	363.966
-0.153509	365.457		0.0397281	364
-0.152424	365.477		0.0409901	364.01
-0.151338	365.481		0.042252	364.012
-0.150253	365.507		0.0435141	364.033
-0.149168	365.511		0.0447762	364.051
-0.148083	365.524		0.0460384	364.053
-0.146998	365.567		0.0473006	364.054
-0.145913	365.571		0.0485629	364.059
-0.144829	365.573		0.0498253	364.068
-0.143745	365.6		0.0510878	364.075
-0.142661	365.64		0.0523504	364.085
-0.141577	365.661		0.053613	364.099
-0.140493	365.698		0.0548758	364.1
-0.139409	365.703		0.0561386	364.173
-0.138326	365.709		0.0574015	364.182
-0.137243	365.716		0.0586645	364.211
-0.136159	365.721		0.0599276	364.297
-0.135077	365.722		0.0611908	364.304
-0.133994	365.725		0.0624541	364.312
-0.132911	365.759		0.0637175	364.319
-0.131829	365.775		0.064981	364.328
-0.130746	365.797		0.0662446	364.357
-0.129664	365.816		0.0675083	364.363
-0.128582	365.819		0.0687721	364.366
-0.1275	365.826		0.070036	364.367
-0.126418	365.827		0.0713001	364.392
-0.125337	365.829		0.0725642	364.393
-0.124255	365.875		0.0738285	364.402
-0.123174	365.891		0.0750928	364.407
-0.122093	365.899		0.0763573	364.43
-0.121012	365.9		0.077622	364.442
-0.119931	365.913		0.0788867	364.463
-0.11885	365.929		0.0801516	364.508
-0.11777	365.933		0.0814166	364.533
-0.116689	365.951		0.0826817	364.562
-0.115609	365.952		0.083947	364.58
-0.114529	365.97		0.0852124	364.639
-0.113449	365.98		0.0864779	364.697
-0.112369	365.986		0.0877436	364.71
-0.111289	365.991		0.0890094	364.735
-0.11021	366		0.0902753	364.745
-0.10913	366.016		0.0915414	364.765
-0.108051	366.021		0.0928077	364.767
-0.106971	366.043		0.0940741	364.803
-0.105892	366.046		0.0953406	364.833
-0.104813	366.058		0.0966073	364.844
-0.103734	366.096		0.0978742	364.863
-0.102656	366.103		0.0991412	364.9
-0.101577	366.107		0.100408	364.902
-0.100498	366.116		0.101676	364.942
-0.09942	366.163		0.102943	364.969
-0.0983417	366.168		0.104211	364.99
-0.0972635	366.171		0.105479	365
-0.0961854	366.173		0.106747	365.012
-0.0951075	366.176		0.108015	365.029
-0.0940296	366.189		0.109283	365.031
-0.0929519	366.192		0.110552	365.048
-0.0918743	366.205		0.11182	365.051
-0.0907967	366.208		0.113089	365.054
-0.0897193	366.216		0.114358	365.062
-0.088642	366.216		0.115628	365.073
-0.0875648	366.237		0.116897	365.076
-0.0864877	366.246		0.118167	365.1
-0.0854106	366.268		0.119436	365.106
-0.0843337	366.301		0.120706	365.109
-0.0832569	366.311		0.121977	365.135
-0.0821802	366.326		0.123247	365.142
-0.0811036	366.34		0.124518	365.159
-0.080027	366.378		0.125788	365.181
-0.0789506	366.424		0.127059	365.229
-0.0778743	366.44		0.128331	365.247
-0.076798	366.448		0.129602	365.264
-0.0757218	366.467		0.130874	365.286
-0.0746457	366.469		0.132145	365.288
-0.0735698	366.471		0.133418	365.32
-0.0724938	366.497		0.13469	365.322
-0.071418	366.502		0.135962	365.328
-0.0703423	366.521		0.137235	365.331
-0.0692666	366.526		0.138508	365.342
-0.068191	366.538		0.139781	365.367
-0.0671155	366.542		0.141054	365.376
-0.0660401	366.549		0.142328	365.386
-0.0649648	366.559		0.143602	365.387
-0.0638895	366.591		0.144876	365.397
-0.0628143	366.591		0.14615	365.404
-0.0617392	366.614		0.147425	365.406
-0.0606641	366.635		0.1487	365.411
-0.0595891	366.643		0.149975	365.44
-0.0585142	366.672		0.15125	365.516
-0.0574394	366.685		0.152525	365.52
-0.0563646	366.686		0.153801	365.547
-0.0552899	366.696		0.155077	365.57
-0.0542152	366.7		0.156353	365.576
-0.0531406	366.702		0.15763	365.599
-0.0520661	366.712		0.158907	365.621
-0.0509916	366.713		0.160184	365.633
-0.0499172	366.744		0.161461	365.671
-0.0488429	366.772		0.162738	365.685
-0.0477686	366.782		0.164016	365.704
-0.0466943	366.79		0.165294	365.722
-0.0456201	366.794		0.166573	365.73
-0.044546	366.824		0.167851	365.733
-0.0434719	366.83		0.16913	365.743
-0.0423979	366.834		0.170409	365.743
-0.0413239	366.844		0.171689	365.749
-0.04025	366.847		0.172969	365.779
-0.0391761	366.854		0.174249	365.794
-0.0381022	366.866		0.175529	365.796
-0.0370284	366.881		0.17681	365.804
-0.0359547	366.893		0.17809	365.809
-0.034881	366.923		0.179372	365.81
-0.0338073	366.923		0.180653	365.826
-0.0327337	366.935		0.181935	365.832
-0.0316601	366.953		0.183217	365.865
-0.0305865	366.958		0.184499	365.922
-0.029513	366.993		0.185782	365.938
-0.0284395	366.994		0.187065	365.945
-0.027366	367.01		0.188348	365.973
-0.0262926	367.016		0.189632	365.977
-0.0252192	367.016		0.190916	366.008
-0.0241458	367.023		0.1922	366.017
-0.0230725	367.042		0.193485	366.05
-0.0219992	367.053		0.194769	366.056
-0.0209259	367.069		0.196055	366.061
-0.0198526	367.071		0.19734	366.08
-0.0187794	367.098		0.198626	366.095
-0.0177061	367.108		0.199912	366.097
-0.0166329	367.158		0.201199	366.108
-0.0155598	367.159		0.202485	366.136
-0.0144866	367.164		0.203773	366.14
-0.0134134	367.209		0.20506	366.146
-0.0123403	367.231		0.206348	366.167
-0.0112672	367.236		0.207636	366.169
-0.0101941	367.237		0.208925	366.178
-0.00912099	367.252		0.210214	366.191
-0.00804791	367.253		0.211503	366.232
-0.00697484	367.254		0.212792	366.259
-0.00590177	367.26		0.214082	366.266
-0.00482871	367.263		0.215373	366.282
-0.00375566	367.283		0.216663	366.296
-0.00268261	367.286		0.217954	366.312
-0.00160957	367.301		0.219246	366.333
-0.000536521	367.33		0.220537	366.339
0.000536521	367.331		0.221829	366.354
0.00160957	367.364		0.223122	366.414
0.00268261	367.371		0.224415	366.418
0.00375566	367.385		0.225708	366.422
0.00482871	367.408		0.227002	366.424
0.00590177	367.409		0.228296	366.428
0.00697484	367.418		0.22959	366.441
0.00804791	367.456		0.230885	366.441
0.00912099	367.458		0.23218	366.5
0.0101941	367.519		0.233475	366.517
0.0112672	367.537		0.234771	366.545
0.0123403	367.54		0.236068	366.546
0.0134134	367.54		0.237364	366.549
0.0144866	367.57		0.238661	366.553
0.0155598	367.573		0.239959	366.643
0.0166329	367.6		0.241257	366.647
0.0177061	367.614		0.242555	366.65
0.0187794	367.626		0.243854	366.661
0.0198526	367.637		0.245153	366.667
0.0209259	367.64		0.246452	366.704
0.0219992	367.655		0.247752	366.705
0.0230725	367.655		0.249053	366.713
0.0241458	367.674		0.250354	366.73
0.0252192	367.69		0.251655	366.741
0.0262926	367.692		0.252957	366.754
0.027366	367.71		0.254259	366.761
0.0284395	367.737		0.255561	366.763
0.029513	367.766		0.256864	366.77
0.0305865	367.774		0.258167	366.79
0.0316601	367.791		0.259471	366.807
0.0327337	367.806		0.260776	366.809
0.0338073	367.818		0.26208	366.82
0.034881	367.823		0.263385	366.822
0.0359547	367.865		0.264691	366.882
0.0370284	367.867		0.265997	366.883
0.0381022	367.894		0.267304	366.888
0.0391761	367.924		0.268611	366.956
0.04025	367.93		0.269918	366.98
0.0413239	367.935		0.271226	366.988
0.0423979	367.942		0.272534	367.019
0.0434719	367.954		0.273843	367.091
0.044546	367.957		0.275152	367.101
0.0456201	367.96		0.276462	367.127
0.0466943	367.969		0.277772	367.131
0.0477686	367.975		0.279083	367.132
0.0488429	367.976		0.280394	367.132
0.0499172	368		0.281706	367.133
0.0509916	368.003		0.283018	367.164
0.0520661	368.003		0.284331	367.171
0.0531406	368.014		0.285644	367.173
0.0542152	368.022		0.286957	367.185
0.0552899	368.023		0.288272	367.202
0.0563646	368.041		0.289586	367.214
0.0574394	368.06		0.290901	367.243
0.0585142	368.063		0.292217	367.247
0.0595891	368.074		0.293533	367.25
0.0606641	368.083		0.29485	367.252
0.0617392	368.127		0.296167	367.258
0.0628143	368.132		0.297485	367.285
0.0638895	368.134		0.298803	367.288
0.0649648	368.15		0.300121	367.318
0.0660401	368.151		0.301441	367.365
0.0671155	368.163		0.30276	367.373
0.068191	368.172		0.304081	367.415
0.0692666	368.177		0.305402	367.425
0.0703423	368.182		0.306723	367.429
0.071418	368.194		0.308045	367.433
0.0724938	368.243		0.309367	367.459
0.0735698	368.273		0.31069	367.475
0.0746457	368.277		0.312014	367.475
0.0757218	368.284		0.313338	367.483
0.076798	368.286		0.314662	367.488
0.0778743	368.303		0.315987	367.489
0.0789506	368.305		0.317313	367.498
0.080027	368.31		0.318639	367.516
0.0811036	368.316		0.319966	367.518
0.0821802	368.324		0.321294	367.524
0.0832569	368.348		0.322622	367.536
0.0843337	368.362		0.32395	367.556
0.0854106	368.362		0.325279	367.582
0.0864877	368.392		0.326609	367.586
0.0875648	368.408		0.327939	367.594
0.088642	368.412		0.32927	367.636
0.0897193	368.412		0.330601	367.636
0.0907967	368.42		0.331933	367.675
0.0918743	368.437		0.333266	367.694
0.0929519	368.438		0.334599	367.723
0.0940296	368.446		0.335933	367.726
0.0951075	368.469		0.337267	367.75
0.0961854	368.469		0.338602	367.78
0.0972635	368.488		0.339938	367.783
0.0983417	368.502		0.341274	367.783
0.09942	368.504		0.342611	367.808
0.100498	368.518		0.343948	367.813
0.101577	368.562		0.345286	367.82
0.102656	368.581		0.346625	367.857
0.103734	368.668		0.347964	367.86
0.104813	368.679		0.349304	367.868
0.105892	368.682		0.350644	367.887
0.106971	368.683		0.351986	367.887
0.108051	368.687		0.353327	367.888
0.10913	368.689		0.35467	367.9
0.11021	368.698		0.356013	367.919
0.111289	368.75		0.357356	367.929
0.112369	368.812		0.358701	367.936
0.113449	368.821		0.360046	368.036
0.114529	368.822		0.361391	368.058
0.115609	368.836		0.362738	368.089
0.116689	368.862		0.364085	368.11
0.11777	368.865		0.365432	368.156
0.11885	368.866		0.366781	368.157
0.119931	368.872		0.36813	368.227
0.121012	368.878		0.369479	368.275
0.122093	368.884		0.370829	368.284
0.123174	368.896		0.37218	368.295
0.124255	368.943		0.373532	368.328
0.125337	368.998		0.374884	368.349
0.126418	369		0.376237	368.349
0.1275	369.02		0.377591	368.35
0.128582	369.062		0.378945	368.369
0.129664	369.075		0.380301	368.377
0.130746	369.076		0.381656	368.378
0.131829	369.097		0.383013	368.393
0.132911	369.1		0.38437	368.4
0.133994	369.118		0.385728	368.405
0.135077	369.118		0.387087	368.422
0.136159	369.124		0.388446	368.429
0.137243	369.13		0.389806	368.442
0.138326	369.134		0.391167	368.475
0.139409	369.136		0.392528	368.489
0.140493	369.146		0.39389	368.519
0.141577	369.169		0.395253	368.54
0.142661	369.172		0.396617	368.567
0.143745	369.181		0.397981	368.574
0.144829	369.206		0.399347	368.616
0.145913	369.212		0.400713	368.62
0.146998	369.216		0.402079	368.63
0.148083	369.22		0.403447	368.643
0.149168	369.222		0.404815	368.684
0.150253	369.228		0.406184	368.695
0.151338	369.286		0.407553	368.708
0.152424	369.286		0.408924	368.753
0.153509	369.302		0.410295	368.766
0.154595	369.307		0.411667	368.766
0.155681	369.33		0.41304	368.777
0.156768	369.331		0.414413	368.798
0.157854	369.334		0.415788	368.809
0.15894	369.353		0.417163	368.812
0.160027	369.363		0.418539	368.833
0.161114	369.366		0.419915	368.853
0.162201	369.373		0.421293	368.859
0.163289	369.382		0.422671	368.878
0.164376	369.391		0.42405	368.882
0.165464	369.393		0.42543	368.904
0.166552	369.397		0.426811	368.927
0.16764	369.409		0.428192	368.949
0.168728	369.412		0.429575	368.954
0.169817	369.435		0.430958	369.017
0.170906	369.441		0.432342	369.018
0.171995	369.447		0.433727	369.026
0.173084	369.451		0.435112	369.049
0.174173	369.462		0.436499	369.062
0.175263	369.483		0.437886	369.088
0.176352	369.487		0.439274	369.093
0.177442	369.508		0.440663	369.107
0.178533	369.539		0.442053	369.128
0.179623	369.543		0.443444	369.134
0.180713	369.565		0.444836	369.165
0.181804	369.568		0.446228	369.182
0.182895	369.582		0.447621	369.236
0.183987	369.583		0.449015	369.281
0.185078	369.597		0.45041	369.301
0.18617	369.619		0.451806	369.314
0.187262	369.665		0.453203	369.351
0.188354	369.674		0.454601	369.397
0.189446	369.674		0.455999	369.41
0.190539	369.703		0.457399	369.451
0.191632	369.712		0.458799	369.484
0.192725	369.72		0.460201	369.509
0.193818	369.729		0.461603	369.528
0.194911	369.73		0.463006	369.532
0.196005	369.743		0.46441	369.539
0.197099	369.772		0.465815	369.542
0.198193	369.777		0.467221	369.631
0.199288	369.799		0.468627	369.639
0.200382	369.817		0.470035	369.674
0.201477	369.819		0.471444	369.682
0.202573	369.831		0.472853	369.689
0.203668	369.846		0.474264	369.696
0.204764	369.846		0.475675	369.706
0.205859	369.857		0.477088	369.71
0.206956	369.896		0.478501	369.774
0.208052	369.902		0.479915	369.805
0.209149	369.927		0.48133	369.839
0.210246	369.927		0.482747	369.851
0.211343	369.932		0.484164	369.857
0.21244	369.943		0.485582	369.871
0.213538	369.949		0.487001	369.961
0.214636	369.96		0.488421	369.972
0.215734	370		0.489842	369.983
0.216832	370.021		0.491264	370
0.217931	370.044		0.492688	370.015
0.21903	370.112		0.494112	370.059
0.220129	370.129		0.495537	370.065
0.221229	370.154		0.496963	370.071
0.222328	370.174		0.49839	370.072
0.223428	370.174		0.499818	370.095
0.224529	370.177		0.501247	370.139
0.225629	370.177		0.502677	370.182
0.22673	370.214		0.504109	370.195
0.227831	370.247		0.505541	370.225
0.228933	370.247		0.506974	370.266
0.230034	370.26		0.508408	370.269
0.231136	370.268		0.509844	370.288
0.232239	370.27		0.51128	370.303
0.233341	370.276		0.512718	370.322
0.234444	370.299		0.514156	370.336
0.235547	370.309		0.515596	370.456
0.23665	370.313		0.517036	370.47
0.237754	370.34		0.518478	370.491
0.238858	370.342		0.519921	370.491
0.239962	370.345		0.521365	370.502
0.241067	370.397		0.52281	370.503
0.242172	370.401		0.524256	370.52
0.243277	370.407		0.525703	370.575
0.244382	370.412		0.527151	370.577
0.245488	370.417		0.528601	370.6
0.246594	370.438		0.530051	370.671
0.2477	370.467		0.531503	370.69
0.248807	370.471		0.532955	370.732
0.249914	370.485		0.534409	370.822
0.251021	370.514		0.535864	370.919
0.252128	370.527		0.53732	370.935
0.253236	370.528		0.538778	370.952
0.254344	370.537		0.540236	370.968
0.255453	370.551		0.541696	370.988
0.256562	370.587		0.543156	371.01
0.257671	370.6		0.544618	371.015
0.25878	370.651		0.546081	371.032
0.25989	370.663		0.547545	371.061
0.261	370.672		0.549011	371.13
0.26211	370.673		0.550477	371.165
0.263221	370.686		0.551945	371.189
0.264332	370.731		0.553414	371.19
0.265444	370.733		0.554884	371.213
0.266555	370.744		0.556356	371.218
0.267667	370.751		0.557828	371.223
0.26878	370.758		0.559302	371.257
0.269892	370.826		0.560777	371.279
0.271005	370.829		0.562253	371.284
0.272119	370.837		0.56373	371.288
0.273232	370.867		0.565209	371.296
0.274346	370.867		0.566689	371.31
0.275461	370.872		0.56817	371.357
0.276575	370.877		0.569652	371.357
0.27769	370.935		0.571136	371.363
0.278806	370.946		0.572621	371.373
0.279922	370.949		0.574107	371.414
0.281038	370.954		0.575594	371.439
0.282154	370.963		0.577083	371.469
0.283271	370.994		0.578573	371.47
0.284388	371		0.580064	371.523
0.285506	371		0.581557	371.551
0.286623	371.029		0.583051	371.561
0.287742	371.035		0.584546	371.607
0.28886	371.039		0.586042	371.616
0.289979	371.044		0.58754	371.658
0.291098	371.058		0.589039	371.689
0.292218	371.058		0.59054	371.748
0.293338	371.096		0.592041	371.757
0.294459	371.132		0.593544	371.771
0.295579	371.134		0.595049	371.858
0.2967	371.137		0.596555	371.866
0.297822	371.142		0.598062	371.883
0.298944	371.147		0.59957	371.886
0.300066	371.163		0.60108	371.917
0.301189	371.177		0.602591	371.938
0.302312	371.203		0.604104	371.946
0.303435	371.247		0.605618	371.949
0.304559	371.248		0.607133	371.985
0.305683	371.249		0.60865	372
0.306808	371.275		0.610168	372.045
0.307933	371.278		0.611688	372.068
0.309058	371.317		0.613209	372.13
0.310184	371.326		0.614731	372.14
0.31131	371.399		0.616255	372.203
0.312436	371.414		0.61778	372.273
0.313563	371.421		0.619307	372.349
0.314691	371.449		0.620835	372.375
0.315818	371.496		0.622365	372.383
0.316946	371.504		0.623896	372.393
0.318075	371.532		0.625428	372.417
0.319204	371.54		0.626962	372.42
0.320333	371.551		0.628498	372.431
0.321463	371.572		0.630034	372.453
0.322593	371.574		0.631573	372.485
0.323724	371.574		0.633113	372.545
0.324855	371.575		0.634654	372.625
0.325986	371.582		0.636197	372.663
0.327118	371.59		0.637742	372.664
0.32825	371.603		0.639288	372.667
0.329383	371.609		0.640835	372.725
0.330516	371.631		0.642384	372.774
0.331649	371.637		0.643935	372.811
0.332783	371.638		0.645487	372.888
0.333918	371.656		0.647041	372.902
0.335052	371.69		0.648596	372.942
0.336188	371.694		0.650153	372.948
0.337323	371.7		0.651711	372.976
0.338459	371.715		0.653271	373.009
0.339596	371.736		0.654833	373.019
0.340733	371.763		0.656396	373.058
0.34187	371.804		0.657961	373.059
0.343008	371.82		0.659527	373.134
0.344146	371.828		0.661095	373.138
0.345285	371.831		0.662665	373.3
0.346424	371.832		0.664236	373.399
0.347564	371.832		0.665809	373.407
0.348704	371.861		0.667384	373.533
0.349844	371.864		0.66896	373.557
0.350985	371.865		0.670538	373.575
0.352127	371.901		0.672117	373.631
0.353269	371.907		0.673698	373.678
0.354411	371.95		0.675281	373.679
0.355554	371.951		0.676866	373.779
0.356697	371.955		0.678452	373.915
0.357841	371.96		0.68004	373.959
0.358985	372.015		0.68163	374.016
0.36013	372.017		0.683222	374.031
0.361275	372.049		0.684815	374.07
0.362421	372.057		0.68641	374.072
0.363567	372.066		0.688006	374.087
0.364713	372.074		0.689605	374.113
0.36586	372.081		0.691205	374.236
0.367008	372.092		0.692807	374.34
0.368156	372.097		0.694411	374.409
0.369305	372.139		0.696016	374.428
0.370454	372.175		0.697624	374.56
0.371603	372.179		0.699233	374.578
0.372753	372.184		0.700844	374.588
0.373904	372.196		0.702457	374.609
0.375055	372.198		0.704071	374.622
0.376206	372.211		0.705688	374.673
0.377358	372.221		0.707306	374.676
0.378511	372.27		0.708926	374.78
0.379664	372.275		0.710548	374.899
0.380817	372.278		0.712172	374.951
0.381971	372.301		0.713798	374.963
0.383126	372.302		0.715426	375.011
0.384281	372.304		0.717055	375.06
0.385436	372.323		0.718687	375.134
0.386592	372.326		0.72032	375.188
0.387749	372.326		0.721955	375.349
0.388906	372.353		0.723593	375.383
0.390063	372.354		0.725232	375.5
0.391221	372.368		0.726873	375.516
0.39238	372.395		0.728516	375.632
0.393539	372.414		0.730161	375.686
0.394699	372.429		0.731808	376.146
0.395859	372.432		0.733457	376.373
0.39702	372.439		0.735108	376.614
0.398181	372.452		0.736761	376.739
0.399343	372.464		0.738416	376.779
0.400505	372.467		0.740073	376.839
0.401668	372.483		0.741732	376.879
0.402832	372.497		0.743394	376.965
0.403996	372.503		0.745057	377.048
0.40516	372.505		0.746722	377.055
0.406326	372.505		0.748389	377.197
0.407491	372.524		0.750059	377.328
0.408657	372.54		0.75173	377.586
0.409824	372.55		0.753404	377.777
0.410992	372.584		0.75508	377.811
0.412159	372.598		0.756757	378.004
0.413328	372.598		0.758437	378.079
0.414497	372.605		0.76012	378.173
0.415666	372.606		0.761804	378.185
0.416837	372.608		0.76349	378.284
0.418007	372.611		0.765179	378.301
0.419179	372.619		0.76687	378.327
0.42035	372.623		0.768563	378.458
0.421523	372.639		0.770258	378.533
0.422696	372.664		0.771955	378.657
0.42387	372.699		0.773655	378.698
0.425044	372.703		0.775357	378.793
0.426219	372.71		0.777061	378.801
0.427394	372.772		0.778767	378.996
0.42857	372.777		0.780476	379.085
0.429746	372.87		0.782187	379.117
0.430924	372.896		0.7839	379.131
0.432101	372.898		0.785616	379.313
0.43328	372.903		0.787334	379.498
0.434459	372.907		0.789054	379.71
0.435638	372.916		0.790776	379.817
0.436818	372.923		0.792501	379.872
0.437999	372.952		0.794229	379.945
0.43918	372.953		0.795958	380.3
0.440362	372.967		0.79769	380.451
0.441545	372.981		0.799425	381.093
0.442728	372.988		0.801161	381.107
0.443912	372.988		0.802901	381.215
0.445097	372.99		0.804642	381.246
0.446282	372.99		0.806386	381.246
0.447467	372.993		0.808133	381.301
0.448654	372.997		0.809882	381.319
0.449841	373.012		0.811633	381.68
0.451028	373.012		0.813387	381.709
0.452217	373.067		0.815144	381.714
0.453405	373.074		0.816903	381.824
0.454595	373.135		0.818664	381.879
0.455785	373.136		0.820429	381.927
0.456976	373.139		0.822195	382.068
0.458167	373.165		0.823964	382.103
0.459359	373.192		0.825736	382.155
0.460552	373.193		0.827511	382.195
0.461746	373.194		0.829288	382.486
0.46294	373.198		0.831067	382.522
0.464135	373.204		0.83285	382.734
0.46533	373.209		0.834634	383.264
0.466526	373.209		0.836422	383.556
0.467723	373.21		0.838212	383.645
0.46892	373.219		0.840005	383.671
0.470118	373.224		0.841801	383.696
0.471317	373.239		0.843599	383.798
0.472516	373.241		0.8454	384.138
0.473717	373.246		0.847204	384.331
0.474917	373.254		0.849011	384.448
0.476119	373.261		0.85082	384.588
0.477321	373.264		0.852632	384.643
0.478524	373.282		0.854447	384.685
0.479727	373.305		0.856265	384.696
0.480932	373.31		0.858086	384.915
0.482137	373.315		0.859909	385.239
0.483342	373.332		0.861736	385.46
0.484549	373.349		0.863565	385.817
0.485756	373.353		0.865397	386.173
0.486963	373.373		0.867232	386.261
0.488172	373.375		0.86907	386.415
0.489381	373.382		0.870911	386.43
0.490591	373.427		0.872755	386.565
0.491802	373.429		0.874602	386.658
0.493013	373.591		0.876451	386.786
0.494225	373.605		0.878304	386.946
0.495438	373.616		0.88016	387.053
0.496651	373.62		0.882019	387.12
0.497866	373.64		0.883881	387.288
0.499081	373.697		0.885746	387.387
0.500296	373.702		0.887614	387.401
0.501513	373.722		0.889485	387.659
0.50273	373.748		0.891359	388.194
0.503948	373.779		0.893237	388.302
0.505167	373.786		0.895117	388.545
0.506386	373.788		0.897001	388.564
0.507606	373.802		0.898888	388.651
0.508827	373.824		0.900778	388.853
0.510049	373.839		0.902672	389.287
0.511271	373.84		0.904568	389.989
0.512495	373.851		0.906468	390.355
0.513719	373.873		0.908371	390.44
0.514944	373.88		0.910278	390.51
0.516169	373.902		0.912188	390.58
0.517395	373.921		0.914101	390.65
0.518623	373.963		0.916017	390.658
0.51985	373.965		0.917937	390.895
0.521079	373.979		0.91986	391.144
0.522309	373.996		0.921787	391.336
0.523539	374		0.923717	391.361
0.52477	374.014		0.92565	392.181
0.526002	374.021		0.927587	392.535
0.527234	374.033		0.929528	392.646
0.528468	374.034		0.931472	393.233
0.529702	374.071		0.933419	393.344
0.530937	374.084		0.93537	393.446
0.532173	374.087		0.937325	393.675
0.53341	374.099		0.939283	394.216
0.534647	374.14		0.941245	394.483
0.535886	374.142		0.94321	394.806
0.537125	374.148		0.945179	395.066
0.538365	374.177		0.947152	395.594
0.539605	374.204		0.949128	396.133
0.540847	374.224		0.951109	396.267
0.54209	374.249		0.953092	396.453
0.543333	374.272		0.95508	396.573
0.544577	374.278		0.957071	396.6
0.545822	374.289		0.959067	396.827
0.547068	374.313		0.961066	397.046
0.548314	374.334		0.963069	397.147
0.549562	374.363		0.965075	397.857
0.55081	374.378		0.967086	398.125
0.55206	374.441		0.969101	398.867
0.55331	374.441		0.971119	399.025
0.554561	374.453		0.973142	399.117
0.555812	374.474		0.975168	399.633
0.557065	374.479		0.977199	399.849
0.558319	374.514		0.979233	400.101
0.559573	374.518		0.981272	400.263
0.560829	374.543		0.983314	401.095
0.562085	374.599		0.985361	401.366
0.563342	374.606		0.987412	402.054
0.5646	374.62		0.989467	402.25
0.565859	374.624		0.991526	402.524
0.567119	374.625		0.99359	403.126
0.568379	374.626		0.995658	404.473
0.569641	374.635		0.99773	404.634
0.570903	374.648		0.999806	405.99
0.572167	374.676		1.00189	407.183
0.573431	374.678		1.00397	407.28
0.574696	374.73		1.00606	407.286
0.575963	374.744		1.00815	407.364
0.57723	374.757		1.01025	407.795
0.578498	374.776		1.01236	408.067
0.579767	374.799		1.01446	408.115
0.581037	374.812		1.01657	408.312
0.582307	374.824		1.01869	408.461
0.583579	374.843		1.02081	409.252
0.584852	374.849		1.02294	409.473
0.586126	374.861		1.02507	410.211
0.5874	374.862		1.0272	410.787
0.588676	374.868		1.02934	411.404
0.589952	374.888		1.03148	411.647
0.59123	374.903		1.03363	412.583
0.592508	374.908		1.03579	412.851
0.593788	374.92		1.03794	413.302
0.595068	374.94		1.04011	413.425
0.596349	374.955		1.04228	415.076
0.597632	375.013		1.04445	415.536
0.598915	375.016		1.04663	416.193
0.600199	375.031		1.04881	416.594
0.601485	375.033		1.051	416.662
0.602771	375.036		1.05319	416.911
0.604058	375.082		1.05539	417.344
0.605347	375.091		1.05759	419.219
0.606636	375.099		1.0598	419.713
0.607926	375.12		1.06201	419.781
0.609218	375.132		1.06423	420.372
0.61051	375.133		1.06646	421.012
0.611803	375.144		1.06869	421.139
0.613098	375.151		1.07092	421.297
0.614393	375.172		1.07316	421.868
0.61569	375.173		1.07541	422.804
0.616987	375.178		1.07766	423.534
0.618286	375.196		1.07991	424.534
0.619585	375.196		1.08217	425.244
0.620886	375.204		1.08444	425.417
0.622188	375.228		1.08671	425.663
0.62349	375.244		1.08899	426.04
0.624794	375.257		1.09128	426.219
0.626099	375.268		1.09357	426.56
0.627405	375.289		1.09586	427.59
0.628712	375.3		1.09816	431.128
0.63002	375.312		1.10047	431.235
0.631329	375.326		1.10278	431.758
0.632639	375.333		1.1051	432.716
0.633951	375.396		1.10743	433.207
0.635263	375.407		1.10976	434.817
0.636577	375.449		1.1121	434.914
0.637891	375.458		1.11444	434.969
0.639207	375.465		1.11679	436.669
0.640524	375.466		1.11914	436.768
0.641842	375.469		1.12151	437.016
0.643161	375.47		1.12387	437.665
0.644481	375.475		1.12625	439.282
0.645802	375.504		1.12863	440.693
0.647125	375.556		1.13102	441.099
0.648448	375.559		1.13341	441.24
0.649773	375.581		1.13581	442.56
0.651099	375.607		1.13822	443.017
0.652426	375.612		1.14063	443.744
0.653754	375.616		1.14305	443.777
0.655083	375.636		1.14548	445.156
0.656413	375.643		1.14791	449.956
0.657745	375.701		1.15035	452.079
0.659078	375.707		1.1528	452.42
0.660412	375.744		1.15525	452.523
0.661747	375.752		1.15771	454.239
0.663083	375.769		1.16018	454.341
0.66442	375.773		1.16265	454.378
0.665759	375.773		1.16514	455.629
0.667099	375.776		1.16763	456.231
0.66844	375.791		1.17012	456.443
0.669782	375.791		1.17263	459.99
0.671126	375.797		1.17514	460.212
0.67247	375.804		1.17766	460.404
0.673816	375.805		1.18018	462.234
0.675163	375.819		1.18272	463.371
0.676512	375.821		1.18526	463.758
0.677861	375.841		1.18781	463.77
0.679212	375.849		1.19036	464.114
0.680564	375.856		1.19293	464.168
0.681918	375.865		1.1955	466.403
0.683272	375.909		1.19808	466.841
0.684628	375.91		1.20067	467.534
0.685985	375.96		1.20327	467.84
0.687343	375.978		1.20587	468.004
0.688703	376.017		1.20848	469.032
0.690064	376.021		1.21111	470.498
0.691426	376.031		1.21373	471.252
0.692789	376.061		1.21637	471.631
0.694154	376.073		1.21902	472.604
0.69552	376.094		1.22167	473.214
0.696887	376.127		1.22434	474.165
0.698256	376.135		1.22701	475.409
0.699626	376.161		1.22969	477.123
0.700997	376.167		1.23238	479.089
0.70237	376.169		1.23508	479.235
0.703744	376.197		1.23779	481.924
0.705119	376.204		1.2405	486.628
0.706495	376.311		1.24323	486.693
0.707873	376.402		1.24597	487.122
0.709252	376.409		1.24871	488.12
0.710633	376.444		1.25147	493.608
0.712015	376.461		1.25423	495.561
0.713398	376.465		1.257	497.832
0.714783	376.489		1.25979	498.086
0.716169	376.491		1.26258	499.612
0.717556	376.506		1.26538	500.498
0.718945	376.531		1.26819	504.553
0.720335	376.542		1.27102	504.635
0.721727	376.556		1.27385	505.487
0.72312	376.565		1.27669	506.74
0.724514	376.593		1.27955	508.411
0.72591	376.637		1.28241	511.108
0.727307	376.65		1.28529	513.956
0.728706	376.659		1.28817	515.262
0.730106	376.706		1.29107	520.654
0.731508	376.715		1.29398	529.308
0.732911	376.732		1.29689	530.995
0.734315	376.773		1.29982	531.631
0.735721	376.822		1.30276	532.082
0.737128	376.843		1.30571	533.425
0.738537	376.857		1.30868	534.404
0.739947	376.881		1.31165	535.294
0.741359	376.888		1.31464	539.575
0.742772	376.89		1.31764	543.182
0.744186	376.901		1.32065	543.214
0.745603	376.906		1.32367	545.924
0.74702	376.938		1.3267	546.556
0.748439	376.938		1.32975	547.551
0.74986	376.949		1.33281	548.624
0.751282	376.957		1.33588	549.383
0.752706	376.964		1.33896	550.431
0.754131	376.978		1.34206	552.183
0.755558	376.981		1.34517	552.753
0.756986	377.004		1.34829	555.039
0.758416	377.01		1.35142	556.592
0.759847	377.044		1.35457	560.057
0.76128	377.082		1.35774	561.118
0.762715	377.096		1.36091	561.471
0.764151	377.1		1.3641	561.934
0.765588	377.128		1.36731	562.556
0.767028	377.144		1.37052	562.782
0.768468	377.162		1.37376	563.827
0.769911	377.168		1.377	564.421
0.771355	377.177		1.38027	564.986
0.772801	377.25		1.38354	567.027
0.774248	377.265		1.38683	568.228
0.775697	377.274		1.39014	572.828
0.777147	377.315		1.39346	573.525
0.778599	377.36		1.3968	574.2
0.780053	377.372		1.40015	574.91
0.781509	377.373		1.40352	575.591
0.782966	377.381		1.4069	576.949
0.784424	377.385		1.4103	577.438
0.785885	377.392		1.41372	578.511
0.787347	377.407		1.41715	580.464
0.788811	377.442		1.4206	587.81
0.790276	377.472		1.42407	593.108
0.791743	377.479		1.42755	593.256
0.793212	377.483		1.43105	596.497
0.794683	377.491		1.43457	601.437
0.796155	377.492		1.43811	602.118
0.797629	377.517		1.44167	602.351
0.799105	377.56		1.44524	603.326
0.800583	377.57		1.44883	606.459
0.802062	377.58		1.45244	611.389
0.803543	377.581		1.45607	612.863
0.805026	377.6		1.45972	614.09
0.80651	377.618		1.46339	614.529
0.807997	377.639		1.46708	619.323
0.809485	377.644		1.47079	619.59
0.810975	377.706		1.47452	626.262
0.812467	377.717		1.47827	628.836
0.81396	377.727		1.48204	629.879
0.815455	377.736		1.48583	631.929
0.816953	377.742		1.48964	632.251
0.818452	377.743		1.49348	635.7
0.819953	377.748		1.49734	642.534
0.821455	377.762		1.50122	642.813
0.82296	377.768		1.50512	645.736
0.824466	377.784		1.50904	647.534
0.825975	377.803		1.51299	652.105
0.827485	377.81		1.51696	654.73
0.828997	377.831		1.52096	656.672
0.830511	377.832		1.52498	662.562
0.832027	377.853		1.52903	667.15
0.833545	377.857		1.5331	669.314
0.835064	377.862		1.5372	669.971
0.836586	377.863		1.54132	669.973
0.83811	377.865		1.54547	673.56
0.839635	377.869		1.54964	675.611
0.841163	377.903		1.55385	679.509
0.842692	377.92		1.55808	679.963
0.844224	377.966		1.56233	681.752
0.845757	378		1.56662	685.428
0.847292	378		1.57094	685.674
0.84883	378.031		1.57528	697.341
0.850369	378.035		1.57966	698.459
0.851911	378.037		1.58406	698.841
0.853454	378.039		1.5885	699.86
0.855	378.067		1.59297	702.422
0.856547	378.127		1.59747	703.478
0.858097	378.168		1.602	706.14
0.859648	378.171		1.60657	710.118
0.861202	378.176		1.61117	713.566
0.862758	378.193		1.6158	715.664
0.864316	378.199		1.62047	724.475
0.865876	378.204		1.62518	724.583
0.867438	378.217		1.62992	727.96
0.869002	378.219		1.6347	728.151
0.870569	378.228		1.63951	737.133
0.872137	378.258		1.64437	742.062
0.873708	378.279		1.64926	744.406
0.875281	378.306		1.65419	753.226
0.876856	378.306		1.65917	759.083
0.878433	378.388		1.66418	762.817
0.880012	378.401		1.66924	769.169
0.881594	378.402		1.67434	770.339
0.883177	378.409		1.67948	770.571
0.884763	378.434		1.68467	771.493
0.886352	378.456		1.6899	774.282
0.887942	378.489		1.69519	778.58
0.889535	378.5		1.70051	780.835
0.89113	378.544		1.70589	791.942
0.892727	378.545		1.71132	793.457
0.894326	378.571		1.7168	793.563
0.895928	378.58		1.72233	798.111
0.897532	378.581		1.72791	808.714
0.899139	378.582		1.73355	809.085
0.900747	378.591		1.73924	825.487
0.902359	378.646		1.74499	826.752
0.903972	378.667		1.7508	827.157
0.905588	378.698		1.75667	834.046
0.907206	378.711		1.7626	836.754
0.908826	378.714		1.76859	854.691
0.910449	378.726		1.77465	854.911
0.912075	378.73		1.78077	855.807
0.913702	378.747		1.78696	856.857
0.915332	378.748		1.79322	857.745
0.916965	378.765		1.79955	861.28
0.9186	378.812		1.80595	861.514
0.920238	378.825		1.81243	865.417
0.921878	378.825		1.81899	867.556
0.92352	378.842		1.82562	878.64
0.925165	378.85		1.83234	879.233
0.926812	378.871		1.83913	890.283
0.928462	378.883		1.84602	890.459
0.930115	378.933		1.85299	898.488
0.93177	378.946		1.86006	899.203
0.933427	378.992		1.86722	906.803
0.935088	379.036		1.87447	907.479
0.93675	379.068		1.88183	921.678
0.938416	379.083		1.88929	923.965
0.940084	379.089		1.89685	930.371
0.941754	379.11		1.90453	941.696
0.943427	379.142		1.91232	943.944
0.945103	379.16		1.92023	955.174
0.946782	379.165		1.92826	958.399
0.948463	379.257		1.93641	958.806
0.950147	379.282		1.9447	963.552
0.951833	379.297		1.95312	963.848
0.953523	379.316		1.96169	984.97
0.955215	379.465		1.9704	987.01
0.956909	379.601		1.97926	988.882
0.958607	379.608		1.98828	998.752
0.960307	379.614		1.99747	1001.54
0.96201	379.615		2.00682	1002.92
0.963716	379.623		2.01636	1006.13
0.965425	379.648		2.02608	1006.66
0.967136	379.683		2.036	1013.14
0.96885	379.712		2.04612	1030.62
0.970567	379.739		2.05646	1032.14
0.972288	379.75		2.06702	1039.26
0.97401	379.776		2.07782	1041.37
0.975736	379.797		2.08886	1073.57
0.977465	379.802		2.10017	1077.01
0.979197	379.803		2.11175	1093.15
0.980931	379.804		2.12362	1101.7
0.982669	379.812		2.13579	1108.98
0.984409	379.851		2.1483	1115.89
0.986153	379.856		2.16115	1141.34
0.987899	379.876		2.17436	1147.91
0.989649	379.903		2.18797	1149.56
0.991401	379.925		2.20199	1152.3
0.993157	379.93		2.21646	1161.2
0.994915	379.973		2.23141	1164.51
0.996677	380.025		2.24688	1169.75
0.998442	380.042		2.2629	1176.19
1.00021	380.05		2.27953	1178.75
1.00198	380.101		2.29681	1180.94
1.00376	380.108		2.3148	1185.28
1.00553	380.127		2.33358	1197.2
1.00731	380.181		2.35322	1201.06
1.0091	380.191		2.37381	1206.82
1.01088	380.196		2.39546	1223.35
1.01267	380.212		2.41829	1224.62
1.01447	380.222		2.44246	1228.13
1.01626	380.264		2.46815	1238
1.01806	380.289		2.49557	1239.33
1.01987	380.303		2.52501	1256.59
1.02167	380.366		2.55682	1257.5
1.02348	380.376		2.59145	1309.65
1.0253	380.426		2.62949	1334.41
1.02711	380.451		2.67177	1352.98
1.02893	380.471		2.71944	1363
1.03076	380.545		2.77423	1446.04
1.03259	380.591		2.83888	1460.36
1.03442	380.596		2.91815	1462.6
1.03625	380.6		3.02152	1529.01
1.03809	380.603		3.17294	1690.28
1.03993	380.605		3.47914	1722.37
1.04177	380.664
1.04362	380.668
1.04547	380.68
1.04733	380.685
1.04919	380.715
1.05105	380.721
1.05291	380.734
1.05478	380.775
1.05666	380.807
[truncated: 339 more rows]
