# Supplementary material for: An analog to digital converter controls bistable transfer competence development of a widespread bacterial integrative and conjugative element
Source: eLife. 2020 Jul 28;9:e57915. doi: 10.7554/eLife.57915 (PMC7423338; doi:10.7554/eLife.57915)
Supplement: Figure 3—source data 1. [file elife-57915-fig3-data1.xlsx]

## Sheet: Sheet1
Fig. 3A	source data transfer experiments
	Donor	6144		WT pME6032
	Recipient	2744
	Conditions	liquid MM succinate for 24 hours, IPTG 0.1 mM for donor not for recipient, mix donor with recipient 1:2, spread 20 uL on 0.2 um Sartorius filter on MM sucinate 0.01 mM IPTG plate for 48hours
	replicates	1	2	3
	D	40800	7100	390
	R	22800	23400	15000
	Tc	0	0	0	average	Sd
	Tc/D	0	0	0	0	0
	Tc/R	0	0	0	0	0
	Date	190128
	Donor	6317		WT pMEbisR
	Recipient	2744
	Conditions	liquid MM succinate for 24 hours, mix donor with recipient 1:2, spread 20 uL on 0.2 um Sartorius filter on MM sucinate plate for 48hours
	replicates	1	2	3
	D	1190	8500	14200
	R	480000	750000	370000
	Tc	3	4	16	average	Sd
	Tc/D	0.00252101	0.000470588	0.00112676	0.00137279	0.00104712
	Tc/R	6.25e-06	5.33333e-06	4.32432e-05	1.82755e-05	2.16275e-05
	Date	190128
	Donor	6317		WT pMEbisR
	Recipient	2744
	Conditions	liquid MM succinate for 24 hours, IPTG 0.1 mM for donor not for recipient, mix donor with recipient 1:2, spread 20 uL on 0.2 um Sartorius filter on MM sucinate 0.01 mM IPTG plate for 48hours
	replicates	1	2	3
	D	19	17	23
	R	890000	1200000	340000
	Tc	2500	2100	1500	average	Sd
	Tc/D	131.579	123.529	65.2174	106.775	36.2145
	Tc/R	0.00280899	0.00175	0.00441176	0.00299025	0.00134011
	Date	190128
	Donor	6321-6322-6323		delta bisR pME6032
	Recipient	2744
	Conditions	liquid MM succinate for 24 hours, IPTG 0.1 mM for donor not for recipient, mix donor with recipient 1:2, spread 20 uL on 0.2 um Sartorius filter on MM sucinate 0.01 mM IPTG plate for 48hours
	replicates	1	2	3
	D	35600	49000	114000
	R	610000	650000	470000
	Tc	0	0	1	average	Sd
	Tc/D	0	0	8.77193e-06	2.92398e-06	5.06448e-06
	Tc/R	0	0	2.12766e-06	7.0922e-07	1.2284e-06
	Date	190128
	Donor	6324-6325-6326		delta bisR pMEtciR
	Recipient	2744
	Conditions	liquid MM succinate for 24 hours, IPTG 0.1 mM for donor not for recipient, mix donor with recipient 1:2, spread 20 uL on 0.2 um Sartorius filter on MM sucinate 0.01 mM IPTG plate for 48hours
	replicates	1	2	3
	D	59000	8100	43000
	R	1570000	340000	2300000
	Tc	0	0	1	average	Sd
	Tc/D	0	0	2.32558e-05	7.75194e-06	1.34268e-05
	Tc/R	0	0	4.34783e-07	1.44928e-07	2.51022e-07
	Date	170523
	Donor	5805-5806-5807		delta bisR pMEbisR
	Recipient	2744
	Conditions	liquid MM succinate for 24 hours, IPTG 0.1 mM for donor not for recipient, mix donor with recipient 1:2, spread 20 uL on 0.2 um Sartorius filter on MM sucinate 0.01 mM IPTG plate for 48hours
	replicates	1	2	3
	D	430	20800	650
	R	1390000	840000	1930000
	Tc	15100	16200	16300	average	Sd
	Tc/D	35.1163	0.778846	25.0769	20.324	17.6552
	Tc/R	0.0108633	0.0192857	0.0084456	0.0128649	0.0056905
	Date	170523
	Donor	5827-5828-5829		delta tciR pMEbisR
	Recipient	2744
	Conditions	liquid MM succinate for 24 hours, IPTG 0.1 mM for donor not for recipient, mix donor with recipient 1:2, spread 20 uL on 0.2 um Sartorius filter on MM sucinate 0.01 mM IPTG plate for 48hours
	replicates	1	2	3
	D	8800	240	2510
	R	550000	460000	800000
	Tc	6300	7400	12100	average	Sd
	Tc/D	0.715909	30.8333	4.82072	12.1233	16.3328
	Tc/R	0.0114545	0.016087	0.015125	0.0142222	0.00244461
	Date	170523
	Donor	4479-4480-4481		delta tciR
	Recipient	2744
	Conditions	liquid MM succinate for 24 hours, IPTG 0.1 mM for donor not for recipient, mix donor with recipient 1:2, spread 20 uL on 0.2 um Sartorius filter on MM sucinate 0.01 mM IPTG plate for 48hours
	replicates	1	2	3
	D	6100000	2180000	9700000
	R	900000	720000	1520000
	Tc	0	0	0	average	Sd
	Tc/D	0	0	0	0	0
	Tc/R	0	0	0	0	0
