# Supplementary material for: An analog to digital converter controls bistable transfer competence development of a widespread bacterial integrative and conjugative element
Source: eLife. 2020 Jul 28;9:e57915. doi: 10.7554/eLife.57915 (PMC7423338; doi:10.7554/eLife.57915)
Supplement: Figure 3—source data 2. [file elife-57915-fig3-data2.xlsx]

## Sheet: 6425_fl1 copy
P putida UWC1-ICEclc Pint-echerry
	pMEbisR
QQ_6425_fl1	FLUO_6425_fl1
-3.25245	364.576
-2.92609	364.722
-2.76337	369.319
-2.65168	375.385
-2.56568	382.185
-2.49528	384.804
-2.43543	403.202
-2.38321	404.415
-2.33678	405.764
-2.2949	417.208
-2.25669	417.486
-2.22152	421.503
-2.1889	460.42
-2.15846	463.833
-2.12989	465.75
-2.10296	468
-2.07748	484.794
-2.05328	499.068
-2.03022	499.909
-2.0082	502.681
-1.98711	506.204
-1.96686	514.318
-1.94739	514.35
-1.92864	535.375
-1.91054	535.577
-1.89304	542.017
-1.87611	547.155
-1.85969	551.614
-1.84377	552.985
-1.82829	567.631
-1.81324	568.25
-1.7986	570.095
-1.78433	583.033
-1.77041	592.787
-1.75683	599.064
-1.74356	599.806
-1.73059	608.273
-1.71791	618.781
-1.7055	624.352
-1.69335	626
-1.68144	649.95
-1.66977	653.592
-1.65831	667.909
-1.64708	679.731
-1.63604	680.206
-1.6252	682.723
-1.61455	684.86
-1.60408	695.138
-1.59379	695.248
-1.58365	697.14
-1.57368	707.694
-1.56387	708.297
-1.5542	713.437
-1.54467	720.779
-1.53528	730.113
-1.52603	741.562
-1.51691	745.698
-1.5079	746.735
-1.49902	748.5
-1.49026	752.062
-1.48161	754.273
-1.47307	756.988
-1.46463	758.322
-1.4563	760.993
-1.44807	766.423
-1.43994	771.067
-1.43189	775.156
-1.42395	778.632
-1.41609	781.846
-1.40831	787.373
-1.40062	788.667
-1.39301	791.972
-1.38549	792.713
-1.37804	794.331
-1.37066	798.89
-1.36336	799.9
-1.35613	800.843
-1.34897	803.563
-1.34188	804.719
-1.33486	808.324
-1.3279	814.4
-1.32101	816.294
-1.31418	816.46
-1.3074	816.866
-1.30069	829.946
-1.29404	830.602
-1.28744	832.818
-1.2809	834.49
-1.27441	839.589
-1.26798	841.105
-1.2616	843.415
-1.25527	843.703
-1.24899	844.502
-1.24275	847.639
-1.23657	851.095
-1.23043	852.275
-1.22434	855.625
-1.21829	857.543
-1.21229	867.48
-1.20633	867.611
-1.20042	868.814
-1.19454	874.766
-1.18871	876.959
-1.18292	878.579
-1.17716	880.607
-1.17145	881.612
-1.16577	884.087
-1.16013	887.807
-1.15453	888.79
-1.14896	888.827
-1.14343	889.605
-1.13793	891.725
-1.13247	894.255
-1.12704	895.553
-1.12164	895.786
-1.11628	897.702
-1.11095	900.277
-1.10565	901.155
-1.10038	903.154
-1.09514	907.758
-1.08993	909.603
-1.08475	912.81
-1.0796	913.378
-1.07448	914.244
-1.06938	924.342
-1.06432	926.831
-1.05928	926.887
-1.05426	928.482
-1.04928	933.413
-1.04432	933.466
-1.03938	934.355
-1.03447	935.759
-1.02959	939.252
-1.02473	941.014
-1.01989	942.624
-1.01508	947.981
-1.01029	949.2
-1.00552	949.397
-1.00078	951.174
-0.996058	952.708
-0.991359	954.083
-0.986682	954.32
-0.982026	955.085
-0.977392	958.974
-0.972778	960.898
-0.968185	961.631
-0.963612	962.329
-0.95906	964.73
-0.954527	968.317
-0.950014	971.317
-0.94552	971.782
-0.941045	972.689
-0.936589	973.855
-0.932151	980.73
-0.927731	981.068
-0.92333	981.492
-0.918946	988.541
-0.914581	990.941
-0.910232	991.133
-0.9059	991.16
-0.901586	994.334
-0.897288	994.419
-0.893007	996.921
-0.888742	997.943
-0.884493	998.396
-0.88026	1002.27
-0.876043	1002.45
-0.871841	1003.74
-0.867654	1004.19
-0.863483	1012.96
-0.859327	1015.37
-0.855185	1016.65
-0.851059	1017.24
-0.846946	1019.03
-0.842848	1025.48
-0.838764	1025.75
-0.834694	1032.15
-0.830637	1034.91
-0.826595	1037.92
-0.822565	1039.01
-0.81855	1039.48
-0.814547	1041.53
-0.810557	1041.87
-0.80658	1042.12
-0.802616	1043.23
-0.798664	1044.63
-0.794725	1045.07
-0.790798	1049.63
-0.786883	1053.03
-0.782981	1053.5
-0.77909	1054.86
-0.775211	1055.19
-0.771343	1055.37
-0.767487	1057.59
-0.763643	1063.69
-0.75981	1068.89
-0.755987	1070.13
-0.752176	1070.34
-0.748376	1071.07
-0.744586	1071.41
-0.740808	1076.39
-0.737039	1077.3
-0.733282	1081.01
-0.729534	1084.33
-0.725797	1085.25
-0.72207	1086.54
-0.718352	1091.16
-0.714645	1092.44
-0.710948	1094.23
-0.70726	1094.99
-0.703582	1098.19
-0.699913	1101.84
-0.696254	1105.61
-0.692604	1106.54
-0.688963	1110.18
-0.685331	1111.76
-0.681708	1112.28
-0.678095	1115.89
-0.67449	1117.83
-0.670894	1118.45
-0.667306	1120.85
-0.663727	1121.32
-0.660157	1122.15
-0.656595	1122.42
-0.653041	1122.61
-0.649495	1124.89
-0.645958	1127.89
-0.642429	1128.22
-0.638907	1133.89
-0.635394	1136.98
-0.631888	1137.96
-0.62839	1138.91
-0.6249	1141.06
-0.621418	1142.4
-0.617942	1142.85
-0.614475	1142.99
-0.611015	1144.26
-0.607562	1145.42
-0.604116	1146.63
-0.600677	1149.72
-0.597246	1151.06
-0.593821	1152.67
-0.590404	1153.39
-0.586993	1153.74
-0.583589	1157.1
-0.580192	1157.73
-0.576802	1158.54
-0.573418	1159.53
-0.570041	1164.16
-0.56667	1164.18
-0.563306	1165.14
-0.559948	1166.28
-0.556596	1166.86
-0.553251	1168.94
-0.549912	1170.88
-0.546579	1171.01
-0.543252	1171.13
-0.539931	1171.23
-0.536616	1171.41
-0.533306	1171.59
-0.530003	1174.35
-0.526705	1174.51
-0.523414	1175.01
-0.520127	1175.06
-0.516847	1178.42
-0.513572	1178.9
-0.510302	1179.5
-0.507038	1180.86
-0.503779	1180.9
-0.500526	1181.85
-0.497278	1184.91
-0.494035	1187.28
-0.490797	1190.54
-0.487565	1191.56
-0.484337	1194.41
-0.481115	1195.3
-0.477898	1196.17
-0.474685	1196.87
-0.471478	1197.1
-0.468275	1199.5
-0.465077	1200.76
-0.461884	1201.57
-0.458695	1202.92
-0.455511	1203.22
-0.452332	1205.63
-0.449157	1206.45
-0.445987	1209.31
-0.442822	1210.09
-0.43966	1211.84
-0.436504	1212.77
-0.433351	1219.1
-0.430203	1220.56
-0.427059	1221.4
-0.423919	1223.06
-0.420784	1223.58
-0.417652	1223.6
-0.414525	1228.01
-0.411402	1229.23
-0.408282	1230.03
-0.405167	1232.16
-0.402056	1232.39
-0.398948	1232.73
-0.395845	1233.42
-0.392745	1235.29
-0.389649	1235.33
-0.386556	1238.53
-0.383468	1238.59
-0.380383	1239.39
-0.377301	1240.12
-0.374224	1245.36
-0.371149	1246.1
-0.368079	1246.28
-0.365011	1248.04
-0.361947	1248.59
-0.358887	1253.03
-0.35583	1254.73
-0.352776	1259.04
-0.349726	1260.08
-0.346678	1260.63
-0.343634	1263.95
-0.340594	1266.41
-0.337556	1266.66
-0.334521	1266.68
-0.33149	1273.12
-0.328461	1275.16
-0.325436	1276.5
-0.322413	1277.94
-0.319394	1280.36
-0.316377	1282.06
-0.313363	1284.48
-0.310353	1284.73
-0.307344	1285.47
-0.304339	1287.78
-0.301337	1292.97
-0.298337	1293.03
-0.295339	1293.73
-0.292345	1296.56
-0.289353	1299.13
-0.286364	1300.23
-0.283377	1304.27
-0.280393	1307.11
-0.277411	1307.54
-0.274432	1309.69
-0.271455	1311.03
-0.26848	1311.32
-0.265508	1315.47
-0.262539	1316.08
-0.259571	1317.95
-0.256606	1320.45
-0.253643	1323.54
-0.250683	1325.79
-0.247724	1327.12
-0.244768	1329.14
-0.241814	1329.96
-0.238862	1332.62
-0.235912	1333.43
-0.232964	1333.7
-0.230018	1334.89
-0.227074	1335.25
-0.224132	1335.25
-0.221192	1335.35
-0.218254	1335.55
-0.215318	1336.66
-0.212384	1339.03
-0.209451	1341.32
-0.20652	1346.32
-0.203591	1349.26
-0.200664	1350.99
-0.197739	1352.44
-0.194815	1354.46
-0.191893	1354.5
-0.188972	1355.05
-0.186054	1358.32
-0.183136	1360.05
-0.180221	1361.87
-0.177306	1365.26
-0.174394	1365.33
-0.171482	1366.51
-0.168573	1366.73
-0.165664	1371.05
-0.162757	1373.35
-0.159852	1374.5
-0.156948	1377.19
-0.154045	1378.97
-0.151143	1380.08
-0.148243	1386.99
-0.145344	1390.1
-0.142446	1392.59
-0.139549	1394.21
-0.136654	1399.08
-0.13376	1401.41
-0.130866	1402.15
-0.127974	1402.94
-0.125083	1404.53
-0.122193	1408.04
-0.119304	1411.67
-0.116416	1411.91
-0.113529	1412.92
-0.110643	1414.75
-0.107758	1416.14
-0.104874	1416.47
-0.10199	1417.35
-0.0991079	1418.79
-0.0962262	1418.79
-0.0933452	1419.8
-0.0904651	1421.92
-0.0875857	1424.58
-0.0847071	1425.63
-0.0818291	1426.53
-0.0789518	1427.77
-0.0760752	1428.23
-0.0731992	1428.72
-0.0703238	1429.94
-0.067449	1430.02
-0.0645748	1431.74
-0.061701	1433.21
-0.0588278	1437.45
-0.0559551	1443.82
-0.0530828	1445.45
-0.050211	1445.78
-0.0473396	1446.79
-0.0444686	1450.37
-0.0415979	1458.65
-0.0387276	1461.96
-0.0358576	1466.7
-0.0329879	1468.81
-0.0301185	1469.71
-0.0272493	1475.91
-0.0243804	1479.47
-0.0215116	1481.51
-0.0186431	1485.18
-0.0157746	1488.68
-0.0129063	1489.1
-0.0100382	1490.13
-0.00717005	1491.1
-0.00430201	1491.57
-0.001434	1491.62
0.001434	1493.92
0.00430201	1494.84
0.00717005	1496.23
0.0100382	1497.32
0.0129063	1497.87
0.0157746	1499.33
0.0186431	1504.13
0.0215116	1504.41
0.0243804	1506.02
0.0272493	1506.82
0.0301185	1507.55
0.0329879	1507.92
0.0358576	1510.61
0.0387276	1510.62
0.0415979	1515.16
0.0444686	1518.28
0.0473396	1518.35
0.050211	1518.41
0.0530828	1518.71
0.0559551	1521.11
0.0588278	1521.18
0.061701	1521.97
0.0645748	1523.3
0.067449	1523.61
0.0703238	1523.75
0.0731992	1525.76
0.0760752	1528.51
0.0789518	1529.59
0.0818291	1535.95
0.0847071	1536.57
0.0875857	1544.76
0.0904651	1545.19
0.0933452	1546.21
0.0962262	1547.4
0.0991079	1554.45
0.10199	1556.98
0.104874	1559.4
0.107758	1567.01
0.110643	1569.27
0.113529	1570.13
0.116416	1570.66
0.119304	1570.74
0.122193	1573.13
0.125083	1575.68
0.127974	1576.53
0.130866	1578.54
0.13376	1589
0.136654	1590.77
0.139549	1590.96
0.142446	1591.89
0.145344	1592.61
0.148243	1592.8
0.151143	1600.37
0.154045	1605.43
0.156948	1605.59
0.159852	1606.82
0.162757	1609.42
0.165664	1609.84
0.168573	1610.01
0.171482	1610.81
0.174394	1613.21
0.177306	1613.35
0.180221	1619.21
0.183136	1619.85
0.186054	1622.58
0.188972	1622.95
0.191893	1629.67
0.194815	1631.69
0.197739	1632.18
0.200664	1633.73
0.203591	1636.33
0.20652	1637
0.209451	1639.03
0.212384	1644.66
0.215318	1651.69
0.218254	1652.04
0.221192	1658.4
0.224132	1660.91
0.227074	1661.89
0.230018	1664.04
0.232964	1664.16
0.235912	1670.58
0.238862	1671.36
0.241814	1678.36
0.244768	1684.87
0.247724	1685.2
0.250683	1688.55
0.253643	1690.08
0.256606	1693.76
0.259571	1695.69
0.262539	1697.61
0.265508	1700.49
0.26848	1702.09
0.271455	1702.21
0.274432	1705.99
0.277411	1706.87
0.280393	1707.73
0.283377	1707.97
0.286364	1708.03
0.289353	1708.7
0.292345	1710.19
0.295339	1714.09
0.298337	1714.24
0.301337	1716.35
0.304339	1719.49
0.307344	1720.48
0.310353	1720.53
0.313363	1722.09
0.316377	1723.18
0.319394	1725.64
0.322413	1726.12
0.325436	1730.2
0.328461	1733.37
0.33149	1734.34
0.334521	1735.45
0.337556	1737.18
0.340594	1737.32
0.343634	1737.45
0.346678	1740.5
0.349726	1743.16
0.352776	1744.54
0.35583	1745.57
0.358887	1747.5
0.361947	1748.79
0.365011	1753
0.368079	1754.35
0.371149	1756.09
0.374224	1756.73
0.377301	1756.74
0.380383	1760.49
0.383468	1762.18
0.386556	1767.12
0.389649	1776.68
0.392745	1779.65
0.395845	1780.78
0.398948	1782.13
0.402056	1782.84
0.405167	1785.75
0.408282	1786.92
0.411402	1788.55
0.414525	1788.82
0.417652	1789.52
0.420784	1791.75
0.423919	1791.85
0.427059	1795.99
0.430203	1806.48
0.433351	1807.11
0.436504	1810.35
0.43966	1810.81
0.442822	1815.07
0.445987	1816.75
0.449157	1816.87
0.452332	1817.64
0.455511	1818.28
0.458695	1820
0.461884	1820.17
0.465077	1821.21
0.468275	1822.82
0.471478	1831.39
0.474685	1840.78
0.477898	1845.17
0.481115	1846.6
0.484337	1846.66
0.487565	1862.31
0.490797	1863.28
0.494035	1864.97
0.497278	1867.81
0.500526	1872.81
0.503779	1877.96
0.507038	1878.53
0.510302	1878.61
0.513572	1878.93
0.516847	1885.54
0.520127	1889.64
0.523414	1892.22
0.526705	1896.09
0.530003	1900.5
0.533306	1900.92
0.536616	1902.33
0.539931	1906.66
0.543252	1906.7
0.546579	1909.58
0.549912	1912.62
0.553251	1913.16
0.556596	1913.65
0.559948	1917.81
0.563306	1920.35
0.56667	1921.58
0.570041	1922.55
0.573418	1929.66
0.576802	1930.46
0.580192	1939.97
0.583589	1940.12
0.586993	1946.5
0.590404	1950.31
0.593821	1950.97
0.597246	1953
0.600677	1953.1
0.604116	1955.95
0.607562	1962.73
0.611015	1963.58
0.614475	1965.51
0.617942	1965.51
0.621418	1965.91
0.6249	1968.42
0.62839	1971.53
0.631888	1972.57
0.635394	1976.46
0.638907	1985.67
0.642429	1989.58
0.645958	1990.79
0.649495	1991.01
0.653041	1991.2
0.656595	1991.56
0.660157	1995.93
0.663727	1999.51
0.667306	2002.72
0.670894	2011.67
0.67449	2012.95
0.678095	2014.94
0.681708	2024.92
0.685331	2026.62
0.688963	2027.68
0.692604	2028.06
0.696254	2032.29
0.699913	2032.67
0.703582	2033.52
0.70726	2037.03
0.710948	2040.02
0.714645	2042.35
0.718352	2052
0.72207	2056.61
0.725797	2067.37
0.729534	2069.02
0.733282	2069.6
0.737039	2072.31
0.740808	2072.95
0.744586	2074.18
0.748376	2078.88
0.752176	2080.42
0.755987	2083.17
0.75981	2083.17
0.763643	2084.61
0.767487	2084.91
0.771343	2102.36
0.775211	2106.11
0.77909	2107.96
0.782981	2109.53
0.786883	2110.61
0.790798	2111.98
0.794725	2116.42
0.798664	2120.45
0.802616	2122.25
0.80658	2124.79
0.810557	2124.94
0.814547	2126.56
0.81855	2136.21
0.822565	2140.37
0.826595	2140.75
0.830637	2141.01
0.834694	2141.77
0.838764	2144.23
0.842848	2144.24
0.846946	2148.26
0.851059	2151.48
0.855185	2151.52
0.859327	2151.97
0.863483	2152.76
0.867654	2154.98
0.871841	2159.74
0.876043	2161.92
0.88026	2162.39
0.884493	2170.56
0.888742	2173.08
0.893007	2173.81
0.897288	2175.56
0.901586	2175.76
0.9059	2180.22
0.910232	2181.73
0.914581	2189.05
0.918946	2190.38
0.92333	2193.16
0.927731	2195.36
0.932151	2199.21
0.936589	2199.5
0.941045	2201.76
0.94552	2201.86
0.950014	2203.08
0.954527	2203.33
0.95906	2206.82
0.963612	2210.64
0.968185	2219.38
0.972778	2222.42
0.977392	2226.99
0.982026	2227.57
0.986682	2230.91
0.991359	2234.5
0.996058	2234.55
1.00078	2235.92
1.00552	2235.97
1.01029	2237.87
1.01508	2242.12
1.01989	2245.92
1.02473	2255.56
1.02959	2258.33
1.03447	2259.75
1.03938	2260
1.04432	2265.89
1.04928	2272.8
1.05426	2275.6
1.05928	2285
1.06432	2285.51
1.06938	2292.98
1.07448	2294.05
1.0796	2299.62
1.08475	2303.14
1.08993	2305.02
1.09514	2307.09
1.10038	2308
1.10565	2310.6
1.11095	2310.7
1.11628	2311.85
1.12164	2313.95
1.12704	2322.54
1.13247	2330.41
1.13793	2335.12
1.14343	2339.97
1.14896	2343.48
1.15453	2344.37
1.16013	2345.53
1.16577	2351.18
1.17145	2352.98
1.17716	2368.05
1.18292	2374.14
1.18871	2385.83
1.19454	2396.92
1.20042	2398.5
1.20633	2399.28
1.21229	2418.84
1.21829	2422.21
1.22434	2429.49
1.23043	2429.77
1.23657	2430.28
1.24275	2453.05
1.24899	2456.85
1.25527	2462.23
1.2616	2467.14
1.26798	2472.72
1.27441	2479.54
1.2809	2504.77
1.28744	2507.63
1.29404	2510.61
1.30069	2525.63
1.3074	2529.42
1.31418	2529.56
1.32101	2533.2
1.3279	2538
1.33486	2539.35
1.34188	2540.41
1.34897	2542.47
1.35613	2545.86
1.36336	2546.35
1.37066	2571.84
1.37804	2593.82
1.38549	2610.76
1.39301	2628.13
1.40062	2635.07
1.40831	2655.74
1.41609	2667.57
1.42395	2669.57
1.43189	2688.86
1.43994	2690.49
1.44807	2701.31
1.4563	2707.36
1.46463	2730.63
1.47307	2741.7
1.48161	2742.53
1.49026	2756.53
1.49902	2764.28
1.5079	2775.04
1.51691	2785.87
1.52603	2807.02
1.53528	2808.32
1.54467	2858.97
1.5542	2861.95
1.56387	2878.35
1.57368	2880.06
1.58365	2884.03
1.59379	2895.19
1.60408	2928.44
1.61455	2933.28
1.6252	2936.71
1.63604	2964.93
1.64708	2983.82
1.65831	2998.4
1.66977	3032.3
1.68144	3056
1.69335	3091.75
1.7055	3118.18
1.71791	3145.47
1.73059	3152.78
1.74356	3219.17
1.75683	3219.22
1.77041	3224.39
1.78433	3258.3
1.7986	3261.13
1.81324	3270.8
1.82829	3283.85
1.84377	3284.06
1.85969	3289.99
1.87611	3306.36
1.89304	3332.1
1.91054	3343.06
1.92864	3383.02
1.94739	3398.85
1.96686	3470.26
1.98711	3490.97
2.0082	3532.24
2.03022	3607.24
2.05328	3696.63
2.07748	3744.53
2.10296	3747.67
2.12989	3902.54
2.15846	3943.47
2.1889	3989.42
2.22152	4036.81
2.25669	4043.21
2.2949	4112.53
2.33678	4124.9
2.38321	4176.52
2.43543	4220.77
2.49528	4460.68
2.56568	4641.17
2.65168	4946.18
2.76337	5152.85
2.92609	5637.31
3.25245	6529.55
