# Supplementary material for: An analog to digital converter controls bistable transfer competence development of a widespread bacterial integrative and conjugative element
Source: eLife. 2020 Jul 28;9:e57915. doi: 10.7554/eLife.57915 (PMC7423338; doi:10.7554/eLife.57915)
Supplement: Figure 3—source data 3. [file elife-57915-fig3-data3.xlsx]

## Sheet: Sheet2
				75th percentile fluo intensity
File	Strain _nr	mCHERRY	plasmid	rep1	rep2	rep3	mean	sd	Ttest
20170621	5853	UWC1 miniTn5 Pint-eChe/PinR-egfp	pMEbisR	13.8949
20170621	5854	UWC1 miniTn5 Pint-eChe/PinR-egfp	pMEbisR		15.1594
20170621	5855	UWC1 miniTn5 Pint-eChe/PinR-egfp	pMEbisR			12.058	13.7041	1.09742
20180426_5719	5719	UWC1 miniTn5 Pint-eChe/PinR-egfp	pME6032	30.0725
20180426_5725	5725	UWC1 miniTn5 Pint-eChe/PinR-egfp	pME6032		35.0942
20180426_5731	5731	UWC1 miniTn5 Pint-eChe/PinR-egfp	pME6032			34.2174	33.128	2.03704	0.000410462
		GFP
20170621	5853	UWC1 miniTn5 Pint-eChe/PinR-egfp	pMEbisR	27.7681
20170621	5854	UWC1 miniTn5 Pint-eChe/PinR-egfp	pMEbisR		29.971
20170621	5855	UWC1 miniTn5 Pint-eChe/PinR-egfp	pMEbisR			59.1449	38.9614	13.4557
20180426_5719	5719	UWC1 miniTn5 Pint-eChe/PinR-egfp	pME6032	42.3333
20180426_5725	5725	UWC1 miniTn5 Pint-eChe/PinR-egfp	pME6032		38.5543
20180426_5731	5731	UWC1 miniTn5 Pint-eChe/PinR-egfp	pME6032			31.971	37.6196	3.7657	0.656231
		PalpA
20190227_5561_72	5561	UWC1miniTn7 PalpA-gfp	pMEbisR	1452.48
20170725_48h_5561-0.2	5561	UWC1miniTn7 PalpA-gfp	pMEbisR		3034.68
20180118_5561_24h	5561	UWC1miniTn7 PalpA-gfp	pMEbisR			1158.71	1881.96	1080.81
20190925_5503a	5503	UWC1miniTn7 PalpA-gfp	pME6032	42.25
20190925_5503b	5503	UWC1miniTn7 PalpA-gfp	pME6032		72
20190925_5503c	5503	UWC1miniTn7 PalpA-gfp	pME6032			24	46.0833	17.2778	0.0172498
