# Supplementary material for: An analog to digital converter controls bistable transfer competence development of a widespread bacterial integrative and conjugative element
Source: eLife. 2020 Jul 28;9:e57915. doi: 10.7554/eLife.57915 (PMC7423338; doi:10.7554/eLife.57915)
Supplement: Figure 4—source data 1. [file elife-57915-fig4-data1.xlsx]

## Sheet: Sheet1
				Pint-eChe																																				20170521_48h_5776+	20170521_48h_5777+	20170521_48h_5778+	20161117_5585	20161117_5501iptg
File	strain	Plasmid	relevant gene order	Median	eCheMean of Tripl Median	eCHEAvedev
20180426_5719	5719	pME6032	no insert	21.8841	24.5483	1.77617
20180426_5725	5725	pME6032	no insert	26.4348
20180426_5731	5731	pME6032	no insert	25.3261
20170521_48h_5776+	5776	pMEinrR	inrR	17.6377	16.7971	1.37198
20170521_48h_5777+	5777	pMEinrR	inrR	18.0145
20170521_48h_5778+	5778	pMEinrR	inrR	14.7391
20180426_5884	5884	pMEbisD	bisD	25.7101	31.2077	3.66506
20180426_5887	5887	pMEbisD	bisD	36.1449
20180426_5890	5890	pMEbisD	bisD	31.7681
20180426_5724	5724	pMEbisC	bisC	22.7536	23.9372	2.58293
20180426_5730	5730	pMEbisC	bisC	21.2464
20180426_5736	5736	pMEbisC	bisC	27.8116
20180426_6059	6059	pMEbisDC	bisDC	558.246	344.136	204.82
20180426_6060	6060	pMEbisDC	bisDC	600.804
20180426_6061	6061	pMEbisDC	bisDC	483.551
20180406_6059	6059	pMEbisDC	bisDC	48.5145
20180406_6060	6060	pMEbisDC	bisDC	25.2971
20180406_6061	6061	pMEbisDC	bisDC	348.406
20180307_6042	6042	pMEEE6.4AfeI	parA-shi-bisD	20.6232	36.9565	10.8889
20180307_6046	6046	pMEEE6.4AfeI	parA-shi-bisD	44.3768
20180307_6050	6050	pMEEE6.4AfeI	parA-shi-bisD	45.8696
20180307_6043	6043	pMEEE6.4PstI	parA-shi-bisD-bisC	633.906	510.176	160.098
20180307_6047	6047	pMEEE6.4PstI	parA-shi-bisD-bisC	270.029
20180307_6051	6051	pMEEE6.4PstI	parA-shi-bisD-bisC	626.594
20180307_6044	6044	pMEEE6.4alpAAfeI	alpA-parA-shi-bisD	16.1014	21.7174	4.20773
20180307_6048	6048	pMEEE6.4alpAAfeI	alpA-parA-shi-bisD	21.0217
20180307_6052	6052	pMEEE6.4alpAAfeI	alpA-parA-shi-bisD	28.029
20180307_6045	6045	pMEEE6.4alpAPstI	alpA-parA-shi-bisD-bisC	118.058	351.336	155.519
20180307_6049	6049	pMEEE6.4alpAPstI	alpA-parA-shi-bisD-bisC	533.268
20180307_6053	6053	pMEEE6.4alpAPstI	alpA-parA-shi-bisD-bisC	402.681
20180118_5985	5985	pMEregWT	PalpA-alpA-parA-shi-bisD-bisC-96323-95213-inrR	17.3768	19.4879	2.41868
20180118_5986	5986	pMEregWT	PalpA-alpA-parA-shi-bisD-bisC-96323-95213-inrR	23.1159
20180118_5987	5987	pMEregWT	PalpA-alpA-parA-shi-bisD-bisC-96323-95213-inrR	17.971
20170201_5720	5720	pME EE6.4	Ptac-parA-shi-bisD-bisC-96323-95213-inrR	903.196	1114.07	168.216
20190925_5720	5720	pME EE6.4	Ptac-parA-shi-bisD-bisC-96323-95213-inrR	1238
20170823_5726	5726	pME EE6.4	Ptac-parA-shi-bisD-bisC-96323-95213-inrR	1326.58
20190925_5732	5732	pME EE6.4	Ptac-parA-shi-bisD-bisC-96323-95213-inrR	988.522
20190925_5733	5733	pME EE6.4 alpA	Ptac-alpA-parA-shi-bisD-bisC-96323-95213-inrR	1157.56	1242.25	116.375
20190925_5727	5727	pME EE6.4 alpA	Ptac-alpA-parA-shi-bisD-bisC-96323-95213-inrR	1239.82
20190925_5721	5721	pME EE6.4 alpA	Ptac-alpA-parA-shi-bisD-bisC-96323-95213-inrR	1475
20170201_5721	5721	pME EE6.4 alpA	Ptac-alpA-parA-shi-bisD-bisC-96323-95213-inrR	1096.62
