# Supplementary material for: An analog to digital converter controls bistable transfer competence development of a widespread bacterial integrative and conjugative element
Source: eLife. 2020 Jul 28;9:e57915. doi: 10.7554/eLife.57915 (PMC7423338; doi:10.7554/eLife.57915)
Supplement: Figure 4—source data 2. [file elife-57915-fig4-data2.xlsx]

## Sheet: Figure4_SourceData_qq.csv
P putide UCW1-ICEclc Pint-echerry
	BisD			BisC			BisDC
QQ_6426_fl1	FLUO_6426_fl1		QQ_6427_fl1	FLUO_6427_fl1		QQ_6428_fl1	FLUO_6428_fl1
-3.42839	336.109		-3.38008	329.912		-2.96558	366.085
-3.11789	337.993		-3.06538	333.508		-2.60965	366.185
-2.96409	338.938		-2.90923	334.16		-2.42983	366.867
-2.85897	339.288		-2.8024	337.145		-2.30533	374.881
-2.7783	340.062		-2.72033	337.655		-2.20877	375.212
-2.71245	340.188		-2.6533	337.669		-2.12926	378.571
-2.65661	341.25		-2.59641	337.988		-2.06129	379.026
-2.60799	341.26		-2.54686	338.097		-2.0017	379.455
-2.56486	341.425		-2.50288	338.481		-1.94846	380.863
-2.52603	341.529		-2.46326	338.68		-1.90024	381.601
-2.49066	342.044		-2.42716	338.834		-1.85607	383.542
-2.45817	342.421		-2.39398	339.952		-1.81524	384.342
-2.42808	342.512		-2.36324	339.994		-1.77724	393.707
-2.40004	342.599		-2.33458	340.178		-1.74164	395.01
-2.37376	342.653		-2.30772	340.466		-1.70812	396.295
-2.34904	342.79		-2.28243	340.625		-1.67642	397.856
-2.32566	343.568		-2.25852	340.686		-1.64632	405.075
-2.3035	343.922		-2.23584	340.796		-1.61764	405.888
-2.28241	344.437		-2.21425	340.798		-1.59023	406.493
-2.26229	344.612		-2.19365	340.938		-1.56397	407.31
-2.24305	344.974		-2.17393	341.103		-1.53874	417.782
-2.2246	345		-2.15503	341.335		-1.51446	422.821
-2.20688	345.159		-2.13687	341.809		-1.49104	423.873
-2.18983	345.313		-2.11938	341.833		-1.46841	450.175
-2.17339	345.502		-2.10253	342.034		-1.4465	455.168
-2.15752	345.949		-2.08624	342.184		-1.42527	463.921
-2.14217	346.204		-2.0705	342.21		-1.40467	473.809
-2.12731	346.34		-2.05525	342.245		-1.38464	482.618
-2.11291	346.402		-2.04046	342.336		-1.36515	533.541
-2.09893	346.549		-2.02611	342.594		-1.34617	548.386
-2.08536	346.609		-2.01216	342.708		-1.32766	598.739
-2.07215	346.714		-1.9986	342.815		-1.3096	608.14
-2.0593	346.857		-1.98539	343.251		-1.29195	661.696
-2.04678	346.932		-1.97252	343.504		-1.2747	682.48
-2.03457	346.933		-1.95996	343.537		-1.25781	708.327
-2.02266	347.063		-1.94771	343.687		-1.24128	710.96
-2.01102	347.066		-1.93575	343.828		-1.22508	733.446
-1.99966	347.198		-1.92405	343.887		-1.2092	737.288
-1.98854	347.449		-1.91262	343.921		-1.19362	740.49
-1.97767	347.582		-1.90142	343.926		-1.17832	741.398
-1.96703	347.587		-1.89047	344.444		-1.16329	747.014
-1.9566	347.668		-1.87973	344.476		-1.14852	754.811
-1.94638	347.793		-1.86921	344.537		-1.13399	768.493
-1.93636	347.795		-1.85888	345.009		-1.1197	775.31
-1.92653	347.864		-1.84876	345.046		-1.10564	780.771
-1.91689	348.125		-1.83882	345.061		-1.09179	791.643
-1.90742	348.164		-1.82906	345.227		-1.07815	799.439
-1.89812	348.234		-1.81946	345.289		-1.06471	821.57
-1.88898	348.401		-1.81004	345.433		-1.05145	831.787
-1.87999	348.623		-1.80077	345.545		-1.03838	840.223
-1.87115	348.702		-1.79165	345.664		-1.02548	855
-1.86246	348.704		-1.78268	345.711		-1.01275	856.143
-1.85391	348.726		-1.77386	345.87		-1.00019	869.756
-1.84549	348.781		-1.76516	346.017		-0.987775	879.525
-1.8372	348.914		-1.7566	346.119		-0.975514	901.348
-1.82903	348.937		-1.74817	346.353		-0.963399	926.088
-1.82098	349.034		-1.73986	346.488		-0.951423	928.641
-1.81305	349.106		-1.73166	346.511		-0.939582	952.871
-1.80523	349.108		-1.72359	346.734		-0.927871	973.714
-1.79752	349.121		-1.71562	346.845		-0.916287	977.533
-1.78992	349.364		-1.70776	346.919		-0.904823	984.694
-1.78242	349.532		-1.7	346.977		-0.893478	987.062
-1.77501	349.659		-1.69235	347.024		-0.882247	996.481
-1.76771	349.663		-1.68479	347.054		-0.871125	1002.18
-1.76049	349.674		-1.67733	347.119		-0.860111	1011.59
-1.75337	349.836		-1.66996	347.148		-0.849199	1021.57
-1.74633	349.846		-1.66268	347.196		-0.838388	1026.49
-1.73938	349.963		-1.65549	347.279		-0.827674	1030.92
-1.73252	350.007		-1.64838	347.363		-0.817055	1038.54
-1.72573	350.012		-1.64135	347.442		-0.806526	1053.03
-1.71902	350.036		-1.6344	347.458		-0.796086	1056.31
-1.71239	350.037		-1.62754	347.581		-0.785733	1067.05
-1.70583	350.182		-1.62074	347.678		-0.775462	1069.39
-1.69935	350.185		-1.61403	347.686		-0.765273	1073.37
-1.69294	350.233		-1.60738	347.835		-0.755163	1088.8
-1.68659	350.248		-1.6008	347.847		-0.74513	1091.13
-1.68031	350.34		-1.5943	347.853		-0.735171	1093.87
-1.6741	350.366		-1.58786	347.88		-0.725284	1100.78
-1.66795	350.367		-1.58148	347.982		-0.715467	1103.3
-1.66187	350.404		-1.57517	348.12		-0.70572	1127.42
-1.65584	350.52		-1.56892	348.136		-0.696038	1134.85
-1.64988	350.558		-1.56273	348.201		-0.686422	1140.47
-1.64397	350.566		-1.5566	348.528		-0.676868	1144.3
-1.63812	350.594		-1.55053	348.538		-0.667376	1145.13
-1.63233	350.645		-1.54451	348.542		-0.657944	1164.14
-1.62659	350.734		-1.53855	348.58		-0.64857	1168.78
-1.6209	350.777		-1.53265	348.622		-0.639253	1180.56
-1.61526	350.778		-1.5268	348.857		-0.62999	1194.94
-1.60968	350.826		-1.521	348.942		-0.620782	1204.94
-1.60414	350.881		-1.51525	348.948		-0.611626	1205.1
-1.59866	350.908		-1.50955	348.95		-0.60252	1234.36
-1.59322	351		-1.50389	349.01		-0.593465	1234.92
-1.58783	351.135		-1.49829	349.03		-0.584458	1248.23
-1.58248	351.147		-1.49273	349.045		-0.575498	1273.34
-1.57718	351.337		-1.48722	349.091		-0.566584	1280.09
-1.57192	351.406		-1.48175	349.145		-0.557715	1281.76
-1.56671	351.418		-1.47633	349.187		-0.548889	1287.09
-1.56154	351.488		-1.47095	349.407		-0.540106	1288.97
-1.55641	351.503		-1.46561	349.438		-0.531365	1292.61
-1.55132	351.507		-1.46032	349.533		-0.522663	1293.04
-1.54627	351.603		-1.45506	349.569		-0.514002	1295.19
-1.54126	351.629		-1.44985	349.853		-0.505378	1298.33
-1.53628	351.708		-1.44467	349.864		-0.496793	1299.31
-1.53135	351.762		-1.43953	349.929		-0.488243	1306.81
-1.52645	351.765		-1.43443	349.989		-0.479729	1317.21
-1.52159	351.879		-1.42937	350.008		-0.47125	1317.63
-1.51676	351.976		-1.42434	350.009		-0.462804	1320.52
-1.51197	351.992		-1.41935	350.057		-0.454392	1351.51
-1.50722	352.033		-1.41439	350.059		-0.446011	1357.52
-1.5025	352.099		-1.40947	350.1		-0.437662	1363.67
-1.49781	352.14		-1.40458	350.105		-0.429343	1368.11
-1.49315	352.171		-1.39973	350.12		-0.421054	1370.26
-1.48853	352.242		-1.39491	350.173		-0.412793	1374.75
-1.48393	352.394		-1.39012	350.284		-0.40456	1379.49
-1.47937	352.436		-1.38536	350.29		-0.396355	1388.46
-1.47484	352.574		-1.38063	350.378		-0.388177	1392.95
-1.47034	352.6		-1.37594	350.402		-0.380024	1393.67
-1.46587	352.606		-1.37127	350.485		-0.371897	1395.4
-1.46143	352.664		-1.36664	350.574		-0.363794	1413.56
-1.45701	352.729		-1.36203	350.581		-0.355715	1419.56
-1.45263	352.736		-1.35745	350.606		-0.347658	1432.29
-1.44827	352.758		-1.3529	350.614		-0.339625	1438.36
-1.44394	352.787		-1.34838	350.661		-0.331613	1438.69
-1.43964	352.93		-1.34389	350.706		-0.323623	1446.73
-1.43536	353.017		-1.33942	350.849		-0.315653	1454.5
-1.43111	353.076		-1.33498	350.856		-0.307703	1455.3
-1.42689	353.093		-1.33056	350.867		-0.299773	1463.17
-1.42269	353.117		-1.32617	350.907		-0.291861	1466.65
-1.41851	353.168		-1.32181	350.98		-0.283968	1471.84
-1.41436	353.195		-1.31747	350.998		-0.276092	1472.41
-1.41024	353.251		-1.31316	351.017		-0.268233	1479.43
-1.40613	353.284		-1.30887	351.36		-0.260391	1479.73
-1.40206	353.301		-1.3046	351.364		-0.252565	1480.95
-1.398	353.423		-1.30036	351.365		-0.244755	1491.98
-1.39397	353.436		-1.29614	351.385		-0.236959	1494.21
-1.38996	353.47		-1.29194	351.417		-0.229177	1496.88
-1.38597	353.542		-1.28777	351.454		-0.22141	1497.32
-1.382	353.55		-1.28362	351.483		-0.213656	1497.6
-1.37806	353.567		-1.27949	351.614		-0.205914	1500.73
-1.37414	353.579		-1.27538	351.634		-0.198185	1531.24
-1.37024	353.589		-1.2713	351.716		-0.190468	1538.73
-1.36636	353.629		-1.26723	351.728		-0.182762	1560.99
-1.36249	353.635		-1.26319	351.757		-0.175067	1564.08
-1.35865	353.7		-1.25916	351.784		-0.167382	1566.67
-1.35483	353.768		-1.25516	351.88		-0.159707	1573.3
-1.35103	353.803		-1.25118	351.885		-0.152042	1573.83
-1.34725	353.805		-1.24721	351.997		-0.144385	1574.3
-1.34349	353.813		-1.24327	352.134		-0.136737	1577.65
-1.33975	353.868		-1.23935	352.285		-0.129097	1582.05
-1.33602	353.89		-1.23544	352.367		-0.121464	1586.29
-1.33232	353.938		-1.23155	352.396		-0.113839	1594.07
-1.32863	353.953		-1.22769	352.458		-0.10622	1611.92
-1.32496	354.051		-1.22383	352.466		-0.0986072	1616.36
-1.32131	354.112		-1.22	352.509		-0.0910002	1632.01
-1.31767	354.117		-1.21619	352.516		-0.0833984	1634.25
-1.31405	354.122		-1.21239	352.551		-0.0758015	1636.43
-1.31045	354.194		-1.20861	352.681		-0.0682089	1665.57
-1.30687	354.238		-1.20485	352.707		-0.0606203	1666.77
-1.3033	354.242		-1.20111	352.736		-0.0530351	1668.14
-1.29975	354.28		-1.19738	352.747		-0.045453	1668.71
-1.29622	354.34		-1.19367	352.791		-0.0378735	1673.81
-1.2927	354.375		-1.18997	352.8		-0.0302962	1686.5
-1.2892	354.382		-1.18629	352.821		-0.0227206	1694.61
-1.28571	354.384		-1.18263	352.828		-0.0151464	1695.42
-1.28224	354.461		-1.17898	352.849		-0.00757297	1703.67
-1.27879	354.462		-1.17535	352.862		0	1710.59
-1.27535	354.521		-1.17173	352.871		0.00757297	1711.99
-1.27192	354.534		-1.16813	352.885		0.0151464	1712.85
-1.26851	354.631		-1.16455	352.896		0.0227206	1720.01
-1.26512	354.645		-1.16097	352.946		0.0302962	1729.16
-1.26174	354.656		-1.15742	352.949		0.0378735	1730.21
-1.25837	354.679		-1.15388	352.954		0.045453	1739.18
-1.25502	354.705		-1.15035	353.009		0.0530351	1741.02
-1.25168	354.712		-1.14684	353.047		0.0606203	1743.73
-1.24836	354.828		-1.14334	353.052		0.0682089	1748.22
-1.24505	354.831		-1.13985	353.067		0.0758015	1763.22
-1.24175	354.893		-1.13638	353.088		0.0833984	1765.07
-1.23847	354.985		-1.13292	353.089		0.0910002	1778.36
-1.2352	355.007		-1.12948	353.14		0.0986072	1784.96
-1.23194	355.111		-1.12605	353.175		0.10622	1797.74
-1.22869	355.127		-1.12263	353.259		0.113839	1799.02
-1.22546	355.182		-1.11923	353.27		0.121464	1803.09
-1.22224	355.228		-1.11584	353.278		0.129097	1805.3
-1.21904	355.238		-1.11246	353.34		0.136737	1811.48
-1.21585	355.256		-1.10909	353.359		0.144385	1816.32
-1.21266	355.326		-1.10574	353.361		0.152042	1818.7
-1.2095	355.346		-1.1024	353.384		0.159707	1828.43
-1.20634	355.352		-1.09907	353.44		0.167382	1833.38
-1.20319	355.368		-1.09575	353.441		0.175067	1849.31
-1.20006	355.394		-1.09244	353.482		0.182762	1859.26
-1.19694	355.478		-1.08915	353.488		0.190468	1869.72
-1.19383	355.541		-1.08587	353.564		0.198185	1872.33
-1.19073	355.549		-1.0826	353.602		0.205914	1874.41
-1.18765	355.571		-1.07934	353.629		0.213656	1877.7
-1.18457	355.649		-1.0761	353.631		0.22141	1883
-1.18151	355.735		-1.07286	353.641		0.229177	1884.12
-1.17845	355.794		-1.06964	353.646		0.236959	1887.15
-1.17541	355.83		-1.06642	353.703		0.244755	1887.52
-1.17238	355.847		-1.06322	353.788		0.252565	1888
-1.16936	355.941		-1.06003	353.821		0.260391	1900.92
-1.16635	355.965		-1.05685	353.826		0.268233	1901.86
-1.16335	355.975		-1.05368	353.826		0.276092	1904.69
-1.16036	356.014		-1.05052	353.829		0.283968	1919.88
-1.15738	356.017		-1.04737	353.845		0.291861	1926.7
-1.15441	356.064		-1.04423	353.921		0.299773	1929.84
-1.15146	356.07		-1.04111	353.928		0.307703	1934.35
-1.14851	356.071		-1.03799	353.929		0.315653	1937.79
-1.14557	356.077		-1.03488	354		0.323623	1947.01
-1.14264	356.127		-1.03178	354.045		0.331613	1950.05
-1.13972	356.143		-1.02869	354.051		0.339625	1970.05
-1.13681	356.171		-1.02562	354.062		0.347658	1977.66
-1.13391	356.19		-1.02255	354.093		0.355715	1978.85
-1.13102	356.239		-1.01949	354.114		0.363794	1979.15
-1.12814	356.274		-1.01644	354.138		0.371897	1986.53
-1.12527	356.31		-1.0134	354.148		0.380024	1988.9
-1.12241	356.342		-1.01037	354.148		0.388177	1988.98
-1.11956	356.359		-1.00735	354.163		0.396355	1993.78
-1.11671	356.4		-1.00433	354.167		0.40456	1999.1
-1.11388	356.426		-1.00133	354.189		0.412793	2015.98
-1.11105	356.479		-0.998337	354.204		0.421054	2026.4
-1.10824	356.51		-0.995352	354.218		0.429343	2032.33
-1.10543	356.528		-0.992375	354.248		0.437662	2038.7
-1.10263	356.53		-0.989408	354.259		0.446011	2044.82
-1.09984	356.578		-0.986449	354.263		0.454392	2054.01
-1.09706	356.642		-0.983498	354.317		0.462804	2058.04
-1.09428	356.662		-0.980556	354.328		0.47125	2065.99
-1.09152	356.698		-0.977623	354.409		0.479729	2077.3
-1.08876	356.7		-0.974698	354.494		0.488243	2082.61
-1.08601	356.726		-0.971781	354.506		0.496793	2095.44
-1.08327	356.762		-0.968873	354.523		0.505378	2100.09
-1.08054	356.834		-0.965972	354.545		0.514002	2106.46
-1.07781	356.841		-0.96308	354.557		0.522663	2136.14
-1.0751	356.902		-0.960196	354.564		0.531365	2146.32
-1.07239	356.942		-0.95732	354.586		0.540106	2151.84
-1.06969	356.967		-0.954452	354.62		0.548889	2154.21
-1.06699	356.975		-0.951591	354.651		0.557715	2156.29
-1.06431	357.022		-0.948739	354.7		0.566584	2163.78
-1.06163	357.058		-0.945894	354.735		0.575498	2164.26
-1.05896	357.061		-0.943056	354.754		0.584458	2184.5
-1.0563	357.077		-0.940226	354.785		0.593465	2188.74
-1.05364	357.114		-0.937404	354.81		0.60252	2193.72
-1.051	357.135		-0.934589	354.872		0.611626	2197.18
-1.04836	357.16		-0.931782	354.879		0.620782	2207.62
-1.04572	357.166		-0.928982	354.879		0.62999	2222.64
-1.0431	357.172		-0.926189	354.977		0.639253	2226.64
-1.04048	357.174		-0.923403	355.083		0.64857	2226.77
-1.03787	357.179		-0.920625	355.12		0.657944	2227.11
-1.03526	357.217		-0.917853	355.146		0.667376	2229.92
-1.03266	357.217		-0.915089	355.149		0.676868	2245
-1.03007	357.231		-0.912332	355.15		0.686422	2251.96
-1.02749	357.301		-0.909581	355.178		0.696038	2252.72
-1.02491	357.314		-0.906837	355.202		0.70572	2274.86
-1.02234	357.33		-0.904101	355.211		0.715467	2278.2
-1.01978	357.371		-0.901371	355.215		0.725284	2280.27
-1.01722	357.479		-0.898647	355.266		0.735171	2285.67
-1.01467	357.534		-0.895931	355.287		0.74513	2290.52
-1.01213	357.596		-0.89322	355.289		0.755163	2292.15
-1.00959	357.639		-0.890517	355.317		0.765273	2300.88
-1.00706	357.643		-0.88782	355.382		0.775462	2301.15
-1.00454	357.668		-0.885129	355.503		0.785733	2334.15
-1.00202	357.717		-0.882445	355.559		0.796086	2335.54
-0.999511	357.805		-0.879767	355.61		0.806526	2341.68
-0.997006	357.824		-0.877095	355.623		0.817055	2347.52
-0.994508	357.824		-0.87443	355.657		0.827674	2367.11
-0.992015	357.83		-0.871771	355.676		0.838388	2370.07
-0.989529	357.84		-0.869118	355.694		0.849199	2379.1
-0.987049	357.845		-0.866471	355.699		0.860111	2379.42
-0.984575	357.855		-0.86383	355.759		0.871125	2391.26
-0.982107	357.857		-0.861195	355.796		0.882247	2396.7
-0.979644	357.875		-0.858567	355.804		0.893478	2410.12
-0.977188	357.927		-0.855944	355.846		0.904823	2412.08
-0.974738	357.928		-0.853327	355.846		0.916287	2413.62
-0.972293	357.934		-0.850715	355.898		0.927871	2433.28
-0.969855	357.947		-0.84811	355.967		0.939582	2436.51
-0.967422	357.972		-0.84551	355.972		0.951423	2454.52
-0.964994	358.037		-0.842916	356.038		0.963399	2484.47
-0.962573	358.062		-0.840328	356.048		0.975514	2487.46
-0.960157	358.093		-0.837745	356.092		0.987775	2489.9
-0.957746	358.1		-0.835168	356.103		1.00019	2503.03
-0.955342	358.113		-0.832596	356.111		1.01275	2507.63
-0.952942	358.138		-0.83003	356.128		1.02548	2509.68
-0.950548	358.181		-0.827469	356.148		1.03838	2539.59
-0.94816	358.191		-0.824914	356.167		1.05145	2571.02
-0.945777	358.198		-0.822364	356.194		1.06471	2574.72
-0.943399	358.202		-0.81982	356.262		1.07815	2583.26
-0.941027	358.253		-0.817281	356.277		1.09179	2605.73
-0.93866	358.289		-0.814747	356.291		1.10564	2614.97
-0.936298	358.321		-0.812218	356.292		1.1197	2629.3
-0.933942	358.367		-0.809694	356.329		1.13399	2640.02
-0.93159	358.398		-0.807176	356.334		1.14852	2653.44
-0.929244	358.409		-0.804662	356.382		1.16329	2653.44
-0.926903	358.429		-0.802154	356.391		1.17832	2669.4
-0.924567	358.432		-0.799651	356.398		1.19362	2678.44
-0.922236	358.438		-0.797153	356.445		1.2092	2695.26
-0.91991	358.456		-0.79466	356.481		1.22508	2733.23
-0.917589	358.469		-0.792171	356.496		1.24128	2775.6
-0.915273	358.475		-0.789688	356.5		1.25781	2783.58
-0.912961	358.491		-0.787209	356.537		1.2747	2810.56
-0.910655	358.505		-0.784735	356.56		1.29195	2818.71
-0.908353	358.514		-0.782266	356.58		1.3096	2823.98
-0.906057	358.519		-0.779802	356.611		1.32766	2880.77
-0.903765	358.573		-0.777343	356.616		1.34617	2889.11
-0.901477	358.635		-0.774888	356.634		1.36515	2902.84
-0.899195	358.637		-0.772438	356.662		1.38464	2910.71
-0.896917	358.646		-0.769992	356.668		1.40467	2925.99
-0.894644	358.787		-0.767552	356.684		1.42527	2958.85
-0.892375	358.788		-0.765115	356.701		1.4465	2986.73
-0.890111	358.789		-0.762683	356.717		1.46841	2990.34
-0.887852	358.793		-0.760256	356.767		1.49104	2994.75
-0.885597	358.803		-0.757833	356.793		1.51446	3003.51
-0.883346	358.83		-0.755415	356.818		1.53874	3035.57
-0.8811	358.832		-0.753001	356.902		1.56397	3048.07
-0.878859	358.867		-0.750591	356.917		1.59023	3107.89
-0.876622	358.88		-0.748186	356.938		1.61764	3157.37
-0.874389	358.913		-0.745785	356.987		1.64632	3157.45
-0.87216	358.927		-0.743389	357.097		1.67642	3165.5
-0.869936	358.946		-0.740996	357.155		1.70812	3186.67
-0.867717	358.96		-0.738608	357.172		1.74164	3187.45
-0.865501	358.98		-0.736224	357.189		1.77724	3214.62
-0.86329	359.03		-0.733845	357.257		1.81524	3278.67
-0.861083	359.059		-0.731469	357.273		1.85607	3309.92
-0.85888	359.06		-0.729097	357.29		1.90024	3347.6
-0.856681	359.111		-0.72673	357.291		1.94846	3349.82
-0.854487	359.179		-0.724367	357.299		2.0017	3392.05
-0.852296	359.19		-0.722008	357.303		2.06129	3456.57
-0.85011	359.238		-0.719652	357.353		2.12926	3481.37
-0.847927	359.24		-0.717301	357.36		2.20877	3695.38
-0.845749	359.241		-0.714954	357.367		2.30533	3713.84
-0.843575	359.277		-0.71261	357.41		2.42983	3922.78
-0.841404	359.298		-0.710271	357.491		2.60965	4234.95
-0.839238	359.301		-0.707935	357.5		2.96558	5060.95
-0.837076	359.325		-0.705603	357.538
-0.834917	359.355		-0.703276	357.549
-0.832762	359.361		-0.700951	357.57
-0.830612	359.4		-0.698631	357.638
-0.828465	359.4		-0.696315	357.667
-0.826322	359.427		-0.694002	357.668
-0.824182	359.448		-0.691693	357.695
-0.822047	359.466		-0.689387	357.739
-0.819915	359.531		-0.687085	357.763
-0.817787	359.544		-0.684787	357.799
-0.815662	359.572		-0.682493	357.815
-0.813541	359.641		-0.680202	357.875
-0.811424	359.662		-0.677914	357.884
-0.809311	359.663		-0.67563	357.908
-0.807201	359.705		-0.67335	357.914
-0.805095	359.716		-0.671073	357.98
-0.802992	359.761		-0.6688	358.038
-0.800893	359.766		-0.66653	358.042
-0.798797	359.775		-0.664263	358.077
-0.796705	359.81		-0.662	358.085
-0.794616	359.828		-0.659741	358.09
-0.792531	359.867		-0.657484	358.091
-0.790449	359.876		-0.655231	358.098
-0.788371	359.892		-0.652982	358.11
-0.786296	359.924		-0.650735	358.191
-0.784225	359.934		-0.648492	358.192
-0.782156	359.964		-0.646252	358.229
-0.780092	360.019		-0.644016	358.271
-0.77803	360.065		-0.641782	358.272
-0.775972	360.132		-0.639552	358.284
-0.773917	360.153		-0.637325	358.298
-0.771865	360.166		-0.635101	358.3
-0.769817	360.213		-0.632881	358.389
-0.767771	360.233		-0.630663	358.462
-0.765729	360.237		-0.628449	358.486
-0.763691	360.264		-0.626237	358.521
-0.761655	360.323		-0.624029	358.544
-0.759622	360.333		-0.621823	358.589
-0.757593	360.335		-0.619621	358.596
-0.755567	360.351		-0.617422	358.636
-0.753544	360.387		-0.615226	358.642
-0.751524	360.39		-0.613032	358.651
-0.749507	360.429		-0.610842	358.665
-0.747493	360.44		-0.608654	358.674
-0.745482	360.444		-0.60647	358.688
-0.743474	360.514		-0.604288	358.708
-0.741469	360.554		-0.602109	358.716
-0.739467	360.568		-0.599933	358.723
-0.737468	360.576		-0.59776	358.766
-0.735472	360.606		-0.59559	358.769
-0.733479	360.617		-0.593422	358.778
-0.731488	360.661		-0.591258	358.789
-0.729501	360.662		-0.589096	358.791
-0.727517	360.721		-0.586936	358.826
-0.725535	360.784		-0.58478	358.833
-0.723556	360.86		-0.582626	358.84
-0.72158	360.865		-0.580475	358.849
-0.719607	360.883		-0.578327	358.866
-0.717637	360.887		-0.576181	358.872
-0.715669	360.888		-0.574038	358.883
-0.713705	360.889		-0.571898	358.896
-0.711743	360.894		-0.56976	359.019
-0.709783	360.914		-0.567625	359.097
-0.707827	360.933		-0.565492	359.131
-0.705873	360.939		-0.563362	359.144
-0.703922	360.964		-0.561235	359.171
-0.701973	361.041		-0.55911	359.194
-0.700027	361.062		-0.556987	359.25
-0.698084	361.083		-0.554867	359.264
-0.696144	361.095		-0.55275	359.286
-0.694206	361.126		-0.550635	359.339
-0.692271	361.131		-0.548522	359.374
-0.690338	361.148		-0.546412	359.39
-0.688408	361.162		-0.544305	359.473
-0.68648	361.168		-0.542199	359.488
-0.684555	361.172		-0.540097	359.515
-0.682632	361.184		-0.537996	359.524
-0.680712	361.215		-0.535898	359.539
-0.678795	361.236		-0.533802	359.636
-0.67688	361.305		-0.531709	359.639
-0.674967	361.308		-0.529618	359.645
-0.673057	361.322		-0.527529	359.649
-0.67115	361.326		-0.525443	359.678
-0.669245	361.329		-0.523359	359.691
-0.667342	361.33		-0.521277	359.697
-0.665442	361.33		-0.519197	359.732
-0.663544	361.36		-0.51712	359.736
-0.661648	361.38		-0.515045	359.817
-0.659755	361.417		-0.512972	359.854
-0.657864	361.422		-0.510901	359.892
-0.655976	361.511		-0.508833	359.902
-0.65409	361.531		-0.506766	359.957
-0.652206	361.547		-0.504702	359.972
-0.650324	361.555		-0.50264	360.125
-0.648445	361.564		-0.50058	360.133
-0.646568	361.581		-0.498522	360.19
-0.644694	361.665		-0.496467	360.209
-0.642821	361.68		-0.494413	360.215
-0.640951	361.682		-0.492362	360.294
-0.639083	361.684		-0.490312	360.332
-0.637218	361.725		-0.488265	360.332
-0.635354	361.764		-0.486219	360.334
-0.633493	361.767		-0.484176	360.35
-0.631634	361.823		-0.482135	360.392
-0.629777	361.827		-0.480096	360.463
-0.627923	361.86		-0.478058	360.48
-0.62607	361.91		-0.476023	360.486
-0.62422	361.94		-0.47399	360.501
-0.622371	361.947		-0.471958	360.507
-0.620525	361.973		-0.469929	360.519
-0.618681	361.976		-0.467901	360.573
-0.616839	362		-0.465876	360.596
-0.615	362.056		-0.463852	360.596
-0.613162	362.062		-0.46183	360.598
-0.611326	362.064		-0.459811	360.609
-0.609493	362.136		-0.457793	360.671
-0.607661	362.137		-0.455776	360.689
-0.605832	362.144		-0.453762	360.691
-0.604004	362.182		-0.45175	360.695
-0.602179	362.199		-0.449739	360.758
-0.600355	362.275		-0.44773	360.78
-0.598534	362.3		-0.445723	360.787
-0.596714	362.309		-0.443718	360.795
-0.594897	362.322		-0.441715	360.819
-0.593081	362.323		-0.439713	360.831
-0.591267	362.327		-0.437713	360.878
-0.589456	362.343		-0.435715	360.885
-0.587646	362.358		-0.433719	360.946
-0.585838	362.373		-0.431724	360.946
-0.584032	362.429		-0.429731	360.949
-0.582228	362.515		-0.42774	360.954
-0.580426	362.521		-0.42575	360.995
-0.578626	362.556		-0.423762	361.022
-0.576828	362.576		-0.421776	361.062
-0.575031	362.612		-0.419792	361.112
-0.573237	362.613		-0.417809	361.151
-0.571444	362.616		-0.415828	361.163
-0.569653	362.648		-0.413848	361.174
-0.567864	362.717		-0.41187	361.194
-0.566076	362.718		-0.409894	361.198
-0.564291	362.739		-0.407919	361.202
-0.562507	362.763		-0.405946	361.204
-0.560725	362.777		-0.403974	361.212
-0.558945	362.792		-0.402004	361.227
-0.557167	362.902		-0.400035	361.232
-0.55539	362.921		-0.398068	361.236
-0.553615	362.928		-0.396103	361.24
-0.551842	362.936		-0.394139	361.25
-0.550071	362.942		-0.392177	361.25
-0.548301	362.945		-0.390216	361.268
-0.546533	362.945		-0.388257	361.27
-0.544767	362.978		-0.386299	361.407
-0.543002	362.99		-0.384342	361.414
-0.54124	362.995		-0.382388	361.425
-0.539478	363.001		-0.380434	361.44
-0.537719	363.01		-0.378482	361.443
-0.535961	363.022		-0.376532	361.469
-0.534205	363.049		-0.374582	361.505
-0.53245	363.068		-0.372635	361.523
-0.530698	363.078		-0.370688	361.562
-0.528946	363.091		-0.368744	361.563
-0.527197	363.121		-0.3668	361.565
-0.525449	363.172		-0.364858	361.575
-0.523702	363.177		-0.362917	361.591
-0.521957	363.187		-0.360978	361.626
-0.520214	363.188		-0.35904	361.647
-0.518472	363.218		-0.357103	361.664
-0.516732	363.219		-0.355168	361.731
-0.514994	363.234		-0.353234	361.754
-0.513257	363.235		-0.351301	361.777
-0.511521	363.248		-0.34937	361.812
-0.509787	363.28		-0.34744	361.824
-0.508055	363.286		-0.345511	361.929
-0.506324	363.289		-0.343584	361.976
-0.504595	363.289		-0.341657	361.994
-0.502867	363.322		-0.339733	362.027
-0.501141	363.324		-0.337809	362.037
-0.499416	363.333		-0.335886	362.078
-0.497693	363.369		-0.333965	362.08
-0.495971	363.389		-0.332045	362.219
-0.49425	363.395		-0.330127	362.221
-0.492532	363.444		-0.328209	362.231
-0.490814	363.454		-0.326293	362.233
-0.489098	363.463		-0.324378	362.237
-0.487383	363.561		-0.322464	362.24
-0.48567	363.574		-0.320551	362.261
-0.483959	363.6		-0.318639	362.271
-0.482248	363.602		-0.316729	362.325
-0.480539	363.606		-0.31482	362.35
-0.478832	363.683		-0.312912	362.377
-0.477126	363.714		-0.311005	362.38
-0.475421	363.724		-0.309099	362.381
-0.473718	363.737		-0.307194	362.39
-0.472016	363.744		-0.30529	362.425
-0.470315	363.896		-0.303388	362.427
-0.468616	363.936		-0.301487	362.427
-0.466918	363.96		-0.299586	362.462
-0.465221	363.962		-0.297687	362.47
-0.463526	363.965		-0.295789	362.505
-0.461832	363.974		-0.293892	362.59
-0.46014	363.978		-0.291996	362.627
-0.458449	363.978		-0.290101	362.652
-0.456759	363.992		-0.288207	362.667
-0.45507	364.031		-0.286314	362.694
-0.453383	364.065		-0.284422	362.7
-0.451697	364.094		-0.282531	362.702
-0.450012	364.1		-0.280641	362.726
-0.448328	364.132		-0.278752	362.73
-0.446646	364.139		-0.276865	362.754
-0.444965	364.185		-0.274978	362.787
-0.443286	364.228		-0.273092	362.847
-0.441607	364.24		-0.271207	362.86
-0.43993	364.273		-0.269323	362.876
-0.438254	364.28		-0.26744	362.917
-0.436579	364.305		-0.265558	362.932
-0.434906	364.315		-0.263677	362.94
-0.433233	364.344		-0.261797	363.008
-0.431562	364.381		-0.259917	363.029
-0.429893	364.386		-0.258039	363.063
-0.428224	364.415		-0.256162	363.115
-0.426556	364.421		-0.254285	363.171
-0.42489	364.434		-0.252409	363.174
-0.423225	364.47		-0.250535	363.176
-0.421561	364.486		-0.248661	363.212
-0.419898	364.497		-0.246788	363.224
-0.418237	364.497		-0.244916	363.236
-0.416576	364.53		-0.243044	363.286
-0.414917	364.534		-0.241174	363.333
-0.413259	364.553		-0.239304	363.376
-0.411602	364.57		-0.237436	363.391
-0.409946	364.607		-0.235568	363.422
-0.408291	364.628		-0.233701	363.422
-0.406637	364.635		-0.231834	363.43
-0.404985	364.646		-0.229969	363.444
-0.403333	364.652		-0.228104	363.445
-0.401683	364.669		-0.22624	363.571
-0.400034	364.671		-0.224377	363.6
-0.398385	364.708		-0.222515	363.609
-0.396738	364.714		-0.220653	363.633
-0.395092	364.753		-0.218793	363.636
-0.393447	364.768		-0.216933	363.685
-0.391804	364.782		-0.215073	363.72
-0.390161	364.79		-0.213215	363.734
-0.388519	364.799		-0.211357	363.753
-0.386878	364.848		-0.2095	363.754
-0.385239	364.867		-0.207644	363.755
-0.3836	364.871		-0.205788	363.776
-0.381962	364.887		-0.203933	363.844
-0.380326	364.956		-0.202079	363.856
-0.37869	364.959		-0.200225	363.887
-0.377055	365.015		-0.198373	363.896
-0.375422	365.031		-0.19652	363.911
-0.373789	365.076		-0.194669	363.912
-0.372158	365.081		-0.192818	363.935
-0.370527	365.09		-0.190968	363.962
-0.368898	365.099		-0.189118	364.013
-0.367269	365.127		-0.18727	364.014
-0.365641	365.13		-0.185421	364.021
-0.364015	365.133		-0.183574	364.022
-0.362389	365.158		-0.181727	364.037
-0.360764	365.181		-0.179881	364.049
-0.359141	365.215		-0.178035	364.071
-0.357518	365.22		-0.17619	364.087
-0.355896	365.273		-0.174345	364.089
-0.354275	365.274		-0.172501	364.109
-0.352655	365.286		-0.170658	364.122
-0.351036	365.288		-0.168815	364.15
-0.349417	365.299		-0.166973	364.224
-0.3478	365.304		-0.165131	364.251
-0.346184	365.322		-0.16329	364.262
-0.344568	365.324		-0.16145	364.304
-0.342954	365.339		-0.15961	364.313
-0.34134	365.342		-0.15777	364.37
-0.339727	365.368		-0.155932	364.376
-0.338115	365.385		-0.154093	364.378
-0.336504	365.397		-0.152255	364.432
-0.334894	365.413		-0.150418	364.459
-0.333285	365.414		-0.148581	364.542
-0.331676	365.415		-0.146745	364.646
-0.330069	365.422		-0.144909	364.669
-0.328462	365.437		-0.143074	364.67
-0.326856	365.462		-0.141239	364.69
-0.325251	365.462		-0.139405	364.703
-0.323647	365.465		-0.137571	364.741
-0.322044	365.483		-0.135737	364.761
-0.320441	365.516		-0.133904	364.771
-0.31884	365.52		-0.132072	364.781
-0.317239	365.527		-0.13024	364.809
-0.315639	365.538		-0.128408	364.828
-0.314039	365.544		-0.126577	364.839
-0.312441	365.598		-0.124746	364.859
-0.310843	365.622		-0.122916	364.867
-0.309246	365.664		-0.121086	364.881
-0.30765	365.671		-0.119256	364.894
-0.306055	365.687		-0.117427	364.913
-0.30446	365.692		-0.115598	364.922
-0.302867	365.696		-0.11377	364.946
-0.301274	365.732		-0.111942	364.949
-0.299681	365.754		-0.110114	365.014
-0.29809	365.804		-0.108287	365.03
-0.296499	365.813		-0.10646	365.044
-0.294909	365.83		-0.104633	365.071
-0.29332	365.832		-0.102807	365.081
-0.291732	365.861		-0.100981	365.12
-0.290144	365.863		-0.0991559	365.12
-0.288557	365.884		-0.0973307	365.145
-0.286971	365.914		-0.0955059	365.157
-0.285385	365.936		-0.0936813	365.192
-0.2838	365.965		-0.0918571	365.274
-0.282216	365.966		-0.0900332	365.314
-0.280633	365.984		-0.0882095	365.34
-0.27905	365.992		-0.0863862	365.361
-0.277468	366		-0.0845632	365.369
-0.275887	366.024		-0.0827404	365.426
-0.274306	366.028		-0.0809179	365.434
-0.272726	366.051		-0.0790957	365.45
-0.271147	366.067		-0.0772737	365.451
-0.269568	366.068		-0.075452	365.465
-0.26799	366.087		-0.0736306	365.508
-0.266413	366.094		-0.0718094	365.518
-0.264837	366.104		-0.0699884	365.52
-0.263261	366.119		-0.0681677	365.52
-0.261685	366.136		-0.0663471	365.544
-0.260111	366.156		-0.0645269	365.578
-0.258537	366.225		-0.0627068	365.592
-0.256963	366.251		-0.0608869	365.596
-0.255391	366.277		-0.0590672	365.651
-0.253819	366.299		-0.0572478	365.672
-0.252247	366.309		-0.0554285	365.705
-0.250676	366.311		-0.0536094	365.725
-0.249106	366.338		-0.0517905	365.731
-0.247537	366.347		-0.0499717	365.773
-0.245968	366.351		-0.0481531	365.809
-0.244399	366.364		-0.0463347	365.812
-0.242831	366.365		-0.0445164	365.824
-0.241264	366.369		-0.0426983	365.83
-0.239698	366.376		-0.0408803	365.835
-0.238132	366.41		-0.0390625	365.849
-0.236566	366.421		-0.0372448	365.85
-0.235001	366.43		-0.0354272	365.851
-0.233437	366.433		-0.0336097	365.901
-0.231873	366.448		-0.0317923	365.975
-0.23031	366.473		-0.029975	365.977
-0.228748	366.502		-0.0281579	365.987
-0.227186	366.507		-0.0263408	366.011
-0.225624	366.52		-0.0245238	366.019
-0.224063	366.536		-0.0227069	366.025
-0.222503	366.556		-0.0208901	366.039
-0.220943	366.596		-0.0190733	366.073
-0.219384	366.6		-0.0172566	366.161
-0.217825	366.637		-0.01544	366.183
-0.216267	366.638		-0.0136234	366.21
-0.214709	366.647		-0.0118069	366.216
-0.213152	366.699		-0.00999035	366.225
-0.211596	366.699		-0.00817388	366.245
-0.210039	366.722		-0.00635743	366.255
-0.208484	366.771		-0.00454101	366.258
-0.206929	366.777		-0.0027246	366.272
-0.205374	366.779		-0.000908199	366.276
-0.20382	366.822		0.000908199	366.28
-0.202266	366.831		0.0027246	366.309
-0.200713	366.834		0.00454101	366.317
-0.19916	366.851		0.00635743	366.318
-0.197608	366.854		0.00817388	366.352
-0.196057	366.871		0.00999035	366.366
-0.194505	366.874		0.0118069	366.403
-0.192955	366.9		0.0136234	366.407
-0.191404	366.915		0.01544	366.455
-0.189854	366.935		0.0172566	366.469
-0.188305	366.942		0.0190733	366.53
-0.186756	366.972		0.0208901	366.545
-0.185208	366.985		0.0227069	366.547
-0.18366	367.003		0.0245238	366.572
-0.182112	367.019		0.0263408	366.58
-0.180565	367.025		0.0281579	366.598
-0.179018	367.045		0.029975	366.598
-0.177472	367.048		0.0317923	366.628
-0.175926	367.097		0.0336097	366.629
-0.17438	367.116		0.0354272	366.688
-0.172835	367.124		0.0372448	366.703
-0.171291	367.144		0.0390625	366.734
-0.169747	367.203		0.0408803	366.737
-0.168203	367.209		0.0426983	366.769
-0.166659	367.289		0.0445164	366.814
-0.165116	367.296		0.0463347	366.821
-0.163574	367.343		0.0481531	366.859
-0.162031	367.357		0.0499717	366.889
-0.16049	367.362		0.0517905	366.894
-0.158948	367.364		0.0536094	366.923
-0.157407	367.41		0.0554285	366.963
-0.155866	367.44		0.0572478	366.988
-0.154326	367.475		0.0590672	367.042
-0.152786	367.506		0.0608869	367.066
-0.151246	367.51		0.0627068	367.098
-0.149707	367.534		0.0645269	367.13
-0.148168	367.554		0.0663471	367.185
-0.14663	367.566		0.0681677	367.241
-0.145091	367.592		0.0699884	367.265
-0.143553	367.626		0.0718094	367.282
-0.142016	367.627		0.0736306	367.322
-0.140479	367.637		0.075452	367.351
-0.138942	367.654		0.0772737	367.368
-0.137405	367.664		0.0790957	367.374
-0.135869	367.691		0.0809179	367.454
-0.134333	367.701		0.0827404	367.503
-0.132798	367.702		0.0845632	367.562
-0.131262	367.709		0.0863862	367.578
-0.129727	367.722		0.0882095	367.592
-0.128193	367.749		0.0900332	367.613
-0.126659	367.75		0.0918571	367.628
-0.125124	367.816		0.0936813	367.635
-0.123591	367.818		0.0955059	367.642
-0.122057	367.842		0.0973307	367.662
-0.120524	367.861		0.0991559	367.669
-0.118991	367.868		0.100981	367.678
-0.117459	367.89		0.102807	367.702
-0.115926	367.924		0.104633	367.733
-0.114394	367.96		0.10646	367.749
-0.112862	367.965		0.108287	367.761
-0.111331	367.978		0.110114	367.761
-0.1098	367.99		0.111942	367.765
-0.108269	368.03		0.11377	367.79
-0.106738	368.04		0.115598	367.841
-0.105207	368.056		0.117427	367.897
-0.103677	368.059		0.119256	367.902
-0.102147	368.069		0.121086	367.931
-0.100617	368.095		0.122916	367.932
-0.0990877	368.104		0.124746	367.937
-0.0975584	368.11		0.126577	367.986
-0.0960293	368.112		0.128408	367.987
-0.0945005	368.127		0.13024	368
-0.0929718	368.141		0.132072	368.024
-0.0914434	368.146		0.133904	368.043
-0.0899152	368.148		0.135737	368.05
-0.0883872	368.163		0.137571	368.068
-0.0868594	368.17		0.139405	368.096
-0.0853318	368.196		0.141239	368.14
-0.0838045	368.202		0.143074	368.148
-0.0822773	368.203		0.144909	368.18
-0.0807503	368.205		0.146745	368.243
-0.0792235	368.213		0.148581	368.331
-0.0776968	368.223		0.150418	368.393
-0.0761704	368.236		0.152255	368.4
-0.0746441	368.239		0.154093	368.458
-0.073118	368.283		0.155932	368.624
-0.0715921	368.329		0.15777	368.642
-0.0700663	368.37		0.15961	368.642
-0.0685407	368.399		0.16145	368.643
-0.0670153	368.401		0.16329	368.673
-0.06549	368.428		0.165131	368.713
-0.0639649	368.432		0.166973	368.723
-0.0624399	368.449		0.168815	368.73
-0.0609151	368.456		0.170658	368.734
-0.0593904	368.468		0.172501	368.743
-0.0578658	368.47		0.174345	368.764
-0.0563414	368.481		0.17619	368.873
-0.0548171	368.493		0.178035	368.883
-0.053293	368.522		0.179881	368.898
-0.0517689	368.578		0.181727	368.959
-0.050245	368.614		0.183574	368.966
-0.0487212	368.623		0.185421	368.982
-0.0471975	368.663		0.18727	368.994
-0.0456739	368.683		0.189118	368.998
-0.0441505	368.691		0.190968	369.073
-0.0426271	368.717		0.192818	369.102
-0.0411038	368.719		0.194669	369.107
-0.0395807	368.725		0.19652	369.133
-0.0380576	368.749		0.198373	369.161
-0.0365346	368.779		0.200225	369.228
-0.0350117	368.793		0.202079	369.235
-0.0334888	368.795		0.203933	369.24
-0.0319661	368.808		0.205788	369.262
-0.0304434	368.809		0.207644	369.307
-0.0289208	368.817		0.2095	369.339
-0.0273983	368.824		0.211357	369.353
-0.0258758	368.832		0.213215	369.514
-0.0243534	368.836		0.215073	369.522
-0.022831	368.856		0.216933	369.534
-0.0213087	368.864		0.218793	369.576
-0.0197865	368.88		0.220653	369.59
-0.0182642	368.965		0.222515	369.591
-0.0167421	368.968		0.224377	369.609
-0.0152199	368.968		0.22624	369.611
-0.0136979	368.992		0.228104	369.667
-0.0121758	369.006		0.229969	369.707
-0.0106538	369.038		0.231834	369.714
-0.00913174	369.059		0.233701	369.808
-0.00760975	369.08		0.235568	369.809
-0.00608778	369.086		0.237436	369.824
-0.00456582	369.089		0.239304	369.841
-0.00304388	369.092		0.241174	369.869
-0.00152194	369.105		0.243044	369.951
0	369.114		0.244916	370
0.00152194	369.12		0.246788	370.008
0.00304388	369.198		0.248661	370.042
0.00456582	369.207		0.250535	370.043
0.00608778	369.223		0.252409	370.093
0.00760975	369.263		0.254285	370.113
0.00913174	369.286		0.256162	370.129
0.0106538	369.313		0.258039	370.137
0.0121758	369.316		0.259917	370.212
0.0136979	369.325		0.261797	370.226
0.0152199	369.371		0.263677	370.252
0.0167421	369.38		0.265558	370.268
0.0182642	369.394		0.26744	370.276
0.0197865	369.414		0.269323	370.283
0.0213087	369.415		0.271207	370.299
0.022831	369.435		0.273092	370.38
0.0243534	369.442		0.274978	370.453
0.0258758	369.491		0.276865	370.485
0.0273983	369.508		0.278752	370.5
0.0289208	369.519		0.280641	370.517
0.0304434	369.52		0.282531	370.558
0.0319661	369.525		0.284422	370.569
0.0334888	369.539		0.286314	370.577
0.0350117	369.559		0.288207	370.593
0.0365346	369.564		0.290101	370.605
0.0380576	369.573		0.291996	370.659
0.0395807	369.685		0.293892	370.735
0.0411038	369.715		0.295789	370.801
0.0426271	369.728		0.297687	370.817
0.0441505	369.745		0.299586	370.817
0.0456739	369.745		0.301487	370.827
0.0471975	369.759		0.303388	370.837
0.0487212	369.765		0.30529	370.84
0.050245	369.779		0.307194	370.85
0.0517689	369.782		0.309099	370.87
0.053293	369.791		0.311005	370.879
0.0548171	369.822		0.312912	370.893
0.0563414	369.837		0.31482	370.947
0.0578658	369.837		0.316729	370.972
0.0593904	369.844		0.318639	370.978
0.0609151	369.872		0.320551	371.013
0.0624399	369.898		0.322464	371.117
0.0639649	369.914		0.324378	371.15
0.06549	369.917		0.326293	371.156
0.0670153	369.924		0.328209	371.206
0.0685407	369.982		0.330127	371.209
0.0700663	370		0.332045	371.289
0.0715921	370.009		0.333965	371.291
0.073118	370.042		0.335886	371.309
0.0746441	370.048		0.337809	371.352
0.0761704	370.069		0.339733	371.367
0.0776968	370.081		0.341657	371.4
0.0792235	370.082		0.343584	371.409
0.0807503	370.153		0.345511	371.412
0.0822773	370.168		0.34744	371.435
0.0838045	370.173		0.34937	371.446
0.0853318	370.18		0.351301	371.471
0.0868594	370.183		0.353234	371.479
0.0883872	370.188		0.355168	371.49
0.0899152	370.193		0.357103	371.495
0.0914434	370.246		0.35904	371.514
0.0929718	370.248		0.360978	371.52
0.0945005	370.265		0.362917	371.544
0.0960293	370.281		0.364858	371.619
0.0975584	370.298		0.3668	371.635
0.0990877	370.325		0.368744	371.654
0.100617	370.357		0.370688	371.661
0.102147	370.359		0.372635	371.687
0.103677	370.366		0.374582	371.709
0.105207	370.367		0.376532	371.714
0.106738	370.369		0.378482	371.73
0.108269	370.377		0.380434	371.731
0.1098	370.394		0.382388	371.735
0.111331	370.426		0.384342	371.81
0.112862	370.429		0.386299	371.829
0.114394	370.431		0.388257	371.839
0.115926	370.436		0.390216	371.889
0.117459	370.44		0.392177	371.897
0.118991	370.457		0.394139	371.911
0.120524	370.468		0.396103	371.917
0.122057	370.538		0.398068	372.006
0.123591	370.553		0.400035	372.044
0.125124	370.57		0.402004	372.146
0.126659	370.589		0.403974	372.155
0.128193	370.606		0.405946	372.239
0.129727	370.615		0.407919	372.347
0.131262	370.653		0.409894	372.349
0.132798	370.654		0.41187	372.35
0.134333	370.656		0.413848	372.406
0.135869	370.662		0.415828	372.459
0.137405	370.67		0.417809	372.467
0.138942	370.671		0.419792	372.469
0.140479	370.677		0.421776	372.508
0.142016	370.706		0.423762	372.514
0.143553	370.711		0.42575	372.529
0.145091	370.713		0.42774	372.541
0.14663	370.716		0.429731	372.544
0.148168	370.719		0.431724	372.547
0.149707	370.722		0.433719	372.576
0.151246	370.781		0.435715	372.582
0.152786	370.797		0.437713	372.625
0.154326	370.799		0.439713	372.64
0.155866	370.81		0.441715	372.678
0.157407	370.812		0.443718	372.683
0.158948	370.829		0.445723	372.685
0.16049	370.843		0.44773	372.713
0.162031	370.876		0.449739	372.726
0.163574	370.921		0.45175	372.733
0.165116	370.923		0.453762	372.767
0.166659	370.927		0.455776	372.858
0.168203	370.934		0.457793	372.871
0.169747	370.979		0.459811	372.873
0.171291	370.991		0.46183	372.876
0.172835	371.007		0.463852	372.906
0.17438	371.01		0.465876	372.951
0.175926	371.026		0.467901	372.971
0.177472	371.032		0.469929	373.002
0.179018	371.131		0.471958	373.041
0.180565	371.145		0.47399	373.065
0.182112	371.148		0.476023	373.096
0.18366	371.186		0.478058	373.185
0.185208	371.22		0.480096	373.242
0.186756	371.221		0.482135	373.268
0.188305	371.25		0.484176	373.326
0.189854	371.25		0.486219	373.424
0.191404	371.317		0.488265	373.431
0.192955	371.331		0.490312	373.447
0.194505	371.332		0.492362	373.461
0.196057	371.332		0.494413	373.477
0.197608	371.352		0.496467	373.546
0.19916	371.354		0.498522	373.547
0.200713	371.356		0.50058	373.563
0.202266	371.363		0.50264	373.569
0.20382	371.395		0.504702	373.579
0.205374	371.479		0.506766	373.611
0.206929	371.484		0.508833	373.612
0.208484	371.485		0.510901	373.631
0.210039	371.497		0.512972	373.636
0.211596	371.5		0.515045	373.639
0.213152	371.537		0.51712	373.659
0.214709	371.543		0.519197	373.685
0.216267	371.546		0.521277	373.701
0.217825	371.556		0.523359	373.707
0.219384	371.565		0.525443	373.763
0.220943	371.567		0.527529	373.776
0.222503	371.602		0.529618	373.798
0.224063	371.61		0.531709	373.799
0.225624	371.61		0.533802	373.852
0.227186	371.637		0.535898	373.852
0.228748	371.66		0.537996	373.862
0.23031	371.664		0.540097	373.929
0.231873	371.692		0.542199	373.962
0.233437	371.707		0.544305	373.974
0.235001	371.729		0.546412	373.982
0.236566	371.732		0.548522	374.068
0.238132	371.775		0.550635	374.155
0.239698	371.85		0.55275	374.183
0.241264	371.856		0.554867	374.191
0.242831	371.873		0.556987	374.193
0.244399	371.89		0.55911	374.196
0.245968	371.925		0.561235	374.229
0.247537	371.989		0.563362	374.251
0.249106	371.995		0.565492	374.273
0.250676	372.001		0.567625	374.288
0.252247	372.02		0.56976	374.296
0.253819	372.055		0.571898	374.331
0.255391	372.058		0.574038	374.331
0.256963	372.068		0.576181	374.387
0.258537	372.07		0.578327	374.402
0.260111	372.082		0.580475	374.405
0.261685	372.088		0.582626	374.423
0.263261	372.095		0.58478	374.455
0.264837	372.2		0.586936	374.522
0.266413	372.225		0.589096	374.562
0.26799	372.231		0.591258	374.568
0.269568	372.258		0.593422	374.571
0.271147	372.29		0.59559	374.658
0.272726	372.304		0.59776	374.659
0.274306	372.333		0.599933	374.663
0.275887	372.353		0.602109	374.669
0.277468	372.358		0.604288	374.708
0.27905	372.359		0.60647	374.778
0.280633	372.367		0.608654	374.782
0.282216	372.4		0.610842	374.813
0.2838	372.419		0.613032	374.852
0.285385	372.429		0.615226	374.88
0.286971	372.477		0.617422	374.897
0.288557	372.495		0.619621	374.93
0.290144	372.507		0.621823	374.963
0.291732	372.517		0.624029	374.975
0.29332	372.561		0.626237	375
0.294909	372.574		0.628449	375.006
0.296499	372.659		0.630663	375.006
0.29809	372.659		0.632881	375.008
0.299681	372.668		0.635101	375.055
0.301274	372.692		0.637325	375.058
0.302867	372.712		0.639552	375.1
0.30446	372.741		0.641782	375.123
0.306055	372.765		0.644016	375.125
0.30765	372.774		0.646252	375.14
0.309246	372.822		0.648492	375.151
0.310843	372.843		0.650735	375.172
0.312441	372.851		0.652982	375.207
0.314039	372.895		0.655231	375.25
0.315639	372.941		0.657484	375.268
0.317239	373.002		0.659741	375.293
0.31884	373.013		0.662	375.293
0.320441	373.035		0.664263	375.325
0.322044	373.04		0.66653	375.455
0.323647	373.048		0.6688	375.455
0.325251	373.087		0.671073	375.477
0.326856	373.128		0.67335	375.483
0.328462	373.179		0.67563	375.524
0.330069	373.199		0.677914	375.532
0.331676	373.2		0.680202	375.546
0.333285	373.211		0.682493	375.569
0.334894	373.228		0.684787	375.75
0.336504	373.282		0.687085	375.767
0.338115	373.3		0.689387	375.876
0.339727	373.344		0.691693	375.896
0.34134	373.352		0.694002	375.955
0.342954	373.364		0.696315	375.968
0.344568	373.414		0.698631	376.014
0.346184	373.469		0.700951	376.077
0.3478	373.471		0.703276	376.162
0.349417	373.479		0.705603	376.207
0.351036	373.502		0.707935	376.34
0.352655	373.507		0.710271	376.365
0.354275	373.516		0.71261	376.504
0.355896	373.519		0.714954	376.515
0.357518	373.525		0.717301	376.535
0.359141	373.526		0.719652	376.579
0.360764	373.56		0.722008	376.58
0.362389	373.625		0.724367	376.618
0.364015	373.661		0.72673	376.649
0.365641	373.669		0.729097	376.764
0.367269	373.669		0.731469	376.967
0.368898	373.67		0.733845	376.969
0.370527	373.694		0.736224	377.023
0.372158	373.695		0.738608	377.058
0.373789	373.711		0.740996	377.077
0.375422	373.725		0.743389	377.098
0.377055	373.74		0.745785	377.134
0.37869	373.756		0.748186	377.234
0.380326	373.759		0.750591	377.288
0.381962	373.762		0.753001	377.293
0.3836	373.776		0.755415	377.313
0.385239	373.78		0.757833	377.32
0.386878	373.799		0.760256	377.379
0.388519	373.8		0.762683	377.531
0.390161	373.816		0.765115	377.748
0.391804	373.847		0.767552	377.779
0.393447	373.853		0.769992	377.788
0.395092	373.877		0.772438	377.811
0.396738	373.888		0.774888	377.831
0.398385	373.899		0.777343	377.833
0.400034	373.921		0.779802	377.859
0.401683	373.938		0.782266	377.935
0.403333	373.946		0.784735	377.943
0.404985	373.951		0.787209	377.96
0.406637	373.964		0.789688	377.984
0.408291	374.018		0.792171	378.035
0.409946	374.034		0.79466	378.051
0.411602	374.052		0.797153	378.081
0.413259	374.079		0.799651	378.135
0.414917	374.09		0.802154	378.146
0.416576	374.093		0.804662	378.163
0.418237	374.102		0.807176	378.238
0.419898	374.115		0.809694	378.251
0.421561	374.118		0.812218	378.308
0.423225	374.121		0.814747	378.309
0.42489	374.129		0.817281	378.341
0.426556	374.165		0.81982	378.348
0.428224	374.177		0.822364	378.373
0.429893	374.187		0.824914	378.42
0.431562	374.239		0.827469	378.446
0.433233	374.246		0.83003	378.477
0.434906	374.273		0.832596	378.519
0.436579	374.331		0.835168	378.596
0.438254	374.4		0.837745	378.621
0.43993	374.4		0.840328	378.66
0.441607	374.42		0.842916	378.716
0.443286	374.425		0.84551	378.748
0.444965	374.429		0.84811	378.755
0.446646	374.445		0.850715	378.847
0.448328	374.455		0.853327	379.017
0.450012	374.464		0.855944	379.033
0.451697	374.474		0.858567	379.086
0.453383	374.478		0.861195	379.088
0.45507	374.478		0.86383	379.129
0.456759	374.498		0.866471	379.135
0.458449	374.536		0.869118	379.141
0.46014	374.542		0.871771	379.312
0.461832	374.543		0.87443	379.368
0.463526	374.568		0.877095	379.371
0.465221	374.622		0.879767	379.443
0.466918	374.661		0.882445	379.483
0.468616	374.667		0.885129	379.484
0.470315	374.667		0.88782	379.609
0.472016	374.668		0.890517	379.735
0.473718	374.668		0.89322	379.735
0.475421	374.675		0.895931	379.739
0.477126	374.689		0.898647	379.742
0.478832	374.697		0.901371	379.812
0.480539	374.718		0.904101	379.817
0.482248	374.729		0.906837	379.821
0.483959	374.756		0.909581	379.835
0.48567	374.788		0.912332	379.914
0.487383	374.788		0.915089	380.003
0.489098	374.809		0.917853	380.165
0.490814	374.811		0.920625	380.212
0.492532	374.813		0.923403	380.37
0.49425	374.822		0.926189	380.448
0.495971	374.855		0.928982	380.537
0.497693	374.88		0.931782	380.561
0.499416	374.939		0.934589	380.593
0.501141	374.979		0.937404	380.612
0.502867	375.042		0.940226	380.649
0.504595	375.046		0.943056	380.665
0.506324	375.055		0.945894	380.685
0.508055	375.056		0.948739	380.749
0.509787	375.078		0.951591	380.771
0.511521	375.095		0.954452	380.811
0.513257	375.103		0.95732	380.856
0.514994	375.116		0.960196	380.953
0.516732	375.146		0.96308	380.988
0.518472	375.175		0.965972	381.063
0.520214	375.178		0.968873	381.132
0.521957	375.181		0.971781	381.211
0.523702	375.187		0.974698	381.247
0.525449	375.214		0.977623	381.274
0.527197	375.22		0.980556	381.373
0.528946	375.26		0.983498	381.382
0.530698	375.284		0.986449	381.414
0.53245	375.321		0.989408	381.501
0.534205	375.326		0.992375	381.506
0.535961	375.358		0.995352	381.567
0.537719	375.415		0.998337	381.575
0.539478	375.422		1.00133	381.602
0.54124	375.432		1.00433	381.63
0.543002	375.458		1.00735	381.714
0.544767	375.48		1.01037	381.819
0.546533	375.486		1.0134	381.847
0.548301	375.534		1.01644	381.97
0.550071	375.551		1.01949	381.976
0.551842	375.563		1.02255	381.983
0.553615	375.579		1.02562	382.027
0.55539	375.63		1.02869	382.267
0.557167	375.632		1.03178	382.444
0.558945	375.633		1.03488	382.482
0.560725	375.648		1.03799	382.509
0.562507	375.65		1.04111	382.541
0.564291	375.66		1.04423	382.561
0.566076	375.677		1.04737	382.879
0.567864	375.683		1.05052	382.937
0.569653	375.701		1.05368	383.098
0.571444	375.701		1.05685	383.108
0.573237	375.738		1.06003	383.261
0.575031	375.742		1.06322	383.304
0.576828	375.743		1.06642	383.714
0.578626	375.761		1.06964	383.906
0.580426	375.764		1.07286	383.976
0.582228	375.829		1.0761	384.025
0.584032	375.833		1.07934	384.044
0.585838	375.847		1.0826	384.16
0.587646	375.856		1.08587	384.185
0.589456	375.861		1.08915	384.619
0.591267	375.902		1.09244	384.818
0.593081	375.906		1.09575	384.91
0.594897	375.932		1.09907	384.986
0.596714	375.994		1.1024	385.011
0.598534	376.006		1.10574	385.074
0.600355	376.012		1.10909	385.076
0.602179	376.091		1.11246	385.421
0.604004	376.144		1.11584	385.465
0.605832	376.157		1.11923	385.535
0.607661	376.161		1.12263	385.695
0.609493	376.169		1.12605	385.75
0.611326	376.177		1.12948	385.784
0.613162	376.218		1.13292	385.869
0.615	376.244		1.13638	386
0.616839	376.258		1.13985	386.159
0.618681	376.28		1.14334	386.206
0.620525	376.288		1.14684	386.214
0.622371	376.303		1.15035	386.314
0.62422	376.334		1.15388	386.521
0.62607	376.342		1.15742	386.727
0.627923	376.353		1.16097	386.928
0.629777	376.361		1.16455	386.935
0.631634	376.367		1.16813	387.061
0.633493	376.433		1.17173	387.209
0.635354	376.439		1.17535	387.212
0.637218	376.469		1.17898	387.353
0.639083	376.508		1.18263	387.45
0.640951	376.511		1.18629	387.625
0.642821	376.514		1.18997	387.719
0.644694	376.534		1.19367	387.741
0.646568	376.545		1.19738	387.783
0.648445	376.558		1.20111	387.792
0.650324	376.574		1.20485	387.842
0.652206	376.596		1.20861	387.914
0.65409	376.613		1.21239	388.036
0.655976	376.619		1.21619	388.156
0.657864	376.627		1.22	388.233
0.659755	376.715		1.22383	388.264
0.661648	376.724		1.22769	388.316
0.663544	376.755		1.23155	388.38
0.665442	376.764		1.23544	388.588
0.667342	376.773		1.23935	388.619
0.669245	376.782		1.24327	388.757
0.67115	376.794		1.24721	388.772
0.673057	376.801		1.25118	388.818
0.674967	376.82		1.25516	388.906
0.67688	376.833		1.25916	389.211
0.678795	376.834		1.26319	389.273
0.680712	376.835		1.26723	389.653
0.682632	376.871		1.2713	389.82
0.684555	376.886		1.27538	390.129
0.68648	376.922		1.27949	390.467
0.688408	376.927		1.28362	390.783
0.690338	376.953		1.28777	390.898
0.692271	376.98		1.29194	390.941
0.694206	377.013		1.29614	391.516
0.696144	377.042		1.30036	392.194
0.698084	377.073		1.3046	392.231
0.700027	377.09		1.30887	392.238
0.701973	377.147		1.31316	392.943
0.703922	377.207		1.31747	393.058
0.705873	377.21		1.32181	393.077
0.707827	377.237		1.32617	393.312
0.709783	377.241		1.33056	393.524
0.711743	377.243		1.33498	393.909
0.713705	377.256		1.33942	394.2
0.715669	377.278		1.34389	394.266
0.717637	377.288		1.34838	394.927
0.719607	377.343		1.3529	394.931
0.72158	377.384		1.35745	395.34
0.723556	377.385		1.36203	395.505
0.725535	377.392		1.36664	395.546
0.727517	377.405		1.37127	395.689
0.729501	377.412		1.37594	395.742
0.731488	377.44		1.38063	395.766
0.733479	377.454		1.38536	396.017
0.735472	377.486		1.39012	396.174
0.737468	377.495		1.39491	396.827
0.739467	377.526		1.39973	397.086
0.741469	377.572		1.40458	397.174
0.743474	377.605		1.40947	398.521
0.745482	377.606		1.41439	398.55
0.747493	377.646		1.41935	398.951
0.749507	377.662		1.42434	399.796
0.751524	377.691		1.42937	400.337
0.753544	377.692		1.43443	400.438
0.755567	377.692		1.43953	400.557
0.757593	377.731		1.44467	401.559
0.759622	377.769		1.44985	401.601
0.761655	377.788		1.45506	401.918
0.763691	377.791		1.46032	401.929
0.765729	377.821		1.46561	402.746
0.767771	377.826		1.47095	402.814
0.769817	377.828		1.47633	403.869
0.771865	377.878		1.48175	404.407
0.773917	377.895		1.48722	405.273
0.775972	377.919		1.49273	406.152
0.77803	377.988		1.49829	406.967
0.780092	378.007		1.50389	407.061
0.782156	378.046		1.50955	407.601
0.784225	378.057		1.51525	408.333
0.786296	378.071		1.521	413.329
0.788371	378.082		1.5268	413.982
0.790449	378.097		1.53265	414.23
0.792531	378.12		1.53855	416.007
0.794616	378.131		1.54451	416.196
0.796705	378.136		1.55053	417.48
0.798797	378.208		1.5566	419.217
0.800893	378.218		1.56273	420.165
0.802992	378.225		1.56892	422.056
0.805095	378.265		1.57517	426.166
0.807201	378.271		1.58148	426.706
0.809311	378.276		1.58786	426.711
0.811424	378.373		1.5943	428.283
0.813541	378.416		1.6008	430.105
0.815662	378.45		1.60738	430.51
0.817787	378.464		1.61403	431.609
0.819915	378.506		1.62074	436.088
0.822047	378.519		1.62754	438.421
0.824182	378.573		1.6344	438.768
0.826322	378.599		1.64135	441.021
0.828465	378.621		1.64838	443.438
0.830612	378.623		1.65549	444.235
0.832762	378.631		1.66268	447.126
0.834917	378.632		1.66996	465.238
0.837076	378.666		1.67733	465.972
0.839238	378.692		1.68479	468.271
0.841404	378.702		1.69235	471.99
0.843575	378.708		1.7	474.758
0.845749	378.765		1.70776	475.315
0.847927	378.767		1.71562	477.374
0.85011	378.804		1.72359	480.421
0.852296	378.81		1.73166	484.308
0.854487	378.815		1.73986	488.043
0.856681	378.819		1.74817	491.78
0.85888	378.851		1.7566	506.393
0.861083	378.861		1.76516	509.709
0.86329	378.873		1.77386	512.072
0.865501	378.92		1.78268	512.458
0.867717	378.936		1.79165	512.72
0.869936	378.948		1.80077	518.452
0.87216	378.951		1.81004	526.527
0.874389	378.977		1.81946	527.388
0.876622	378.979		1.82906	527.86
0.878859	378.985		1.83882	541.039
0.8811	379.007		1.84876	552.609
0.883346	379.017		1.85888	555.586
0.885597	379.091		1.86921	558.1
0.887852	379.125		1.87973	565.336
0.890111	379.177		1.89047	572.06
0.892375	379.183		1.90142	578.513
0.894644	379.232		1.91262	592.429
0.896917	379.236		1.92405	607.159
0.899195	379.277		1.93575	611.67
0.901477	379.282		1.94771	624.656
0.903765	379.368		1.95996	628.661
0.906057	379.38		1.97252	634.868
0.908353	379.392		1.98539	639.407
0.910655	379.418		1.9986	644.389
0.912961	379.439		2.01216	648.136
0.915273	379.461		2.02611	682.717
0.917589	379.504		2.04046	686.718
0.91991	379.532		2.05525	698.451
0.922236	379.659		2.0705	720.819
0.924567	379.661		2.08624	722.231
0.926903	379.674		2.10253	783.191
0.929244	379.675		2.11938	801.563
0.93159	379.678		2.13687	803.524
0.933942	379.7		2.15503	808.237
0.936298	379.831		2.17393	823.611
0.93866	379.84		2.19365	829.316
0.941027	379.898		2.21425	841
0.943399	379.937		2.23584	850.462
0.945777	379.956		2.25852	880.417
0.94816	379.971		2.28243	899.059
0.950548	379.975		2.30772	905.74
0.952942	379.976		2.33458	919.403
0.955342	379.978		2.36324	939
0.957746	379.982		2.39398	970.212
0.960157	379.99		2.42716	1023.13
0.962573	380		2.46326	1029.45
0.964994	380.012		2.50288	1052.83
0.967422	380.041		2.54686	1198.23
0.969855	380.105		2.59641	1228.04
0.972293	380.119		2.6533	1263.26
0.974738	380.155		2.72033	1284.19
0.977188	380.16		2.8024	1398
0.979644	380.17		2.90923	1498.52
0.982107	380.179		3.06538	1562.29
0.984575	380.21		3.38008	1708.82
0.987049	380.222
0.989529	380.238
0.992015	380.239
0.994508	380.257
0.997006	380.261
0.999511	380.308
1.00202	380.31
1.00454	380.316
1.00706	380.326
1.00959	380.343
1.01213	380.344
1.01467	380.404
1.01722	380.586
1.01978	380.64
1.02234	380.68
1.02491	380.681
1.02749	380.78
1.03007	380.802
1.03266	380.82
1.03526	380.826
1.03787	380.833
1.04048	380.95
1.0431	380.961
1.04572	380.977
1.04836	381.043
1.051	381.064
1.05364	381.105
1.0563	381.111
1.05896	381.113
1.06163	381.16
1.06431	381.162
1.06699	381.193
1.06969	381.214
1.07239	381.315
1.0751	381.395
1.07781	381.468
1.08054	381.53
1.08327	381.543
1.08601	381.557
1.08876	381.591
1.09152	381.629
1.09428	381.638
1.09706	381.653
1.09984	381.676
1.10263	381.717
1.10543	381.718
1.10824	381.722
1.11105	381.727
1.11388	381.884
1.11671	381.98
1.11956	382
1.12241	382.009
1.12527	382.018
1.12814	382.02
1.13102	382.039
1.13391	382.09
1.13681	382.114
1.13972	382.158
1.14264	382.175
1.14557	382.224
1.14851	382.231
1.15146	382.263
1.15441	382.286
1.15738	382.286
1.16036	382.299
1.16335	382.353
1.16635	382.372
1.16936	382.4
1.17238	382.407
1.17541	382.427
1.17845	382.45
1.18151	382.451
1.18457	382.468
1.18765	382.561
1.19073	382.564
1.19383	382.583
1.19694	382.63
1.20006	382.648
1.20319	382.651
1.20634	382.696
1.2095	382.71
1.21266	382.739
1.21585	382.812
1.21904	382.847
1.22224	382.902
1.22546	382.931
1.22869	383
1.23194	383
1.2352	383.006
1.23847	383.033
1.24175	383.107
1.24505	383.137
1.24836	383.153
1.25168	383.179
1.25502	383.181
1.25837	383.233
1.26174	383.286
1.26512	383.292
1.26851	383.392
1.27192	383.429
1.27535	383.454
1.27879	383.535
1.28224	383.557
1.28571	383.563
1.2892	383.567
1.2927	383.593
1.29622	383.809
1.29975	383.851
1.3033	383.93
1.30687	383.966
1.31045	384.005
1.31405	384.102
1.31767	384.114
1.32131	384.16
1.32496	384.257
1.32863	384.307
1.33232	384.422
1.33602	384.528
1.33975	384.661
1.34349	384.703
1.34725	384.742
1.35103	384.787
1.35483	384.79
1.35865	384.834
1.36249	384.875
1.36636	385.002
1.37024	385.003
1.37414	385.021
1.37806	385.022
1.382	385.06
1.38597	385.296
1.38996	385.33
1.39397	385.38
1.398	385.395
1.40206	385.709
1.40613	385.713
1.41024	385.725
1.41436	385.756
1.41851	385.801
1.42269	385.871
1.42689	385.9
1.43111	385.969
1.43536	386.032
1.43964	386.038
1.44394	386.117
1.44827	386.192
1.45263	386.272
1.45701	386.356
1.46143	386.433
1.46587	386.509
1.47034	386.646
1.47484	386.663
1.47937	386.667
1.48393	386.705
1.48853	386.842
1.49315	387
1.49781	387.08
1.5025	387.082
1.50722	387.401
1.51197	387.436
1.51676	387.53
1.52159	387.546
1.52645	387.6
1.53135	387.659
1.53628	387.665
1.54126	387.693
1.54627	387.707
1.55132	387.775
1.55641	387.787
1.56154	387.824
1.56671	387.852
1.57192	387.942
1.57718	387.984
1.58248	388.015
1.58783	388.053
1.59322	388.074
1.59866	388.136
1.60414	388.15
1.60968	388.177
1.61526	388.23
1.6209	388.24
1.62659	388.314
1.63233	388.412
1.63812	388.452
1.64397	388.632
1.64988	388.806
1.65584	388.848
1.66187	388.896
1.66795	388.936
1.6741	389.052
1.68031	389.24
1.68659	389.5
1.69294	389.908
1.69935	390.054
1.70583	390.311
1.71239	390.376
1.71902	390.482
1.72573	390.513
1.73252	390.614
1.73938	390.679
1.74633	390.757
1.75337	390.816
1.76049	390.892
1.76771	390.92
1.77501	390.983
1.78242	391.014
1.78992	391.118
1.79752	391.123
1.80523	391.455
1.81305	391.575
1.82098	391.691
1.82903	391.721
1.8372	392.171
1.84549	392.249
1.85391	392.306
1.86246	392.444
1.87115	392.503
1.87999	392.597
1.88898	392.663
1.89812	392.858
1.90742	393.424
1.91689	393.598
1.92653	393.691
1.93636	393.868
1.94638	393.882
1.9566	393.908
1.96703	394.021
1.97767	394.669
1.98854	394.946
1.99966	395.299
2.01102	395.694
2.02266	395.733
2.03457	396.378
2.04678	396.904
2.0593	397.027
2.07215	398.069
2.08536	398.317
2.09893	398.483
2.11291	398.578
2.12731	398.599
2.14217	398.975
2.15752	399.618
2.17339	399.856
2.18983	399.934
2.20688	400.194
2.2246	400.231
2.24305	402.639
2.26229	403.438
2.28241	403.881
2.3035	403.898
2.32566	403.969
2.34904	404.209
2.37376	404.632
2.40004	406.319
2.42808	407.047
2.45817	408.794
2.49066	409.711
2.52603	410.704
2.56486	428.956
2.60799	434.658
2.65661	450.109
2.71245	535.673
2.7783	763.518
2.85897	863.428
2.96409	1087.43
3.11789	1204.81
3.42839	1478.15
