# Supplementary material for: An analog to digital converter controls bistable transfer competence development of a widespread bacterial integrative and conjugative element
Source: eLife. 2020 Jul 28;9:e57915. doi: 10.7554/eLife.57915 (PMC7423338; doi:10.7554/eLife.57915)
Supplement: Figure 4—source data 3. [file elife-57915-fig4-data3.xlsx]

## Sheet: Sheet1
Fig. 4D
	Date	180711
	Donor	6091		WT pMEbisCD
	Recipient	2744
	Conditions	liquid MM succinate for 24 hours, mix donor with recipient 1:2, spread 20 uL on 0.2 um Sartorius filter on MM sucinate plate for 48hours
	clones	1	2	3
	D	8300	450	71
	R	172000	197000	90
	Tc	1	0	1	average	Sd
	Tc/D	0.000120482	0	0.0140845	0.004735	0.00809714
	Tc/R	5.81395e-06	0	0.0111111	0.00370564	0.00641333
	Date	180711
	Donor	6091		WT pMEbisCD
	Recipient	2744
	Conditions	liquid MM succinate for 24 hours, IPTG 0.1 mM for donor not for recipient, mix donor with recipient 1:2, spread 20 uL on 0.2 um Sartorius filter on MM sucinate 0.01 mM IPTG plate for 48hours
	clones	1	2	3
	D	5260	16	3
	R	59000	63000	59
	Tc	1130	15	67	average	Sd
	Tc/D	0.214829	0.9375	22.3333	7.82855	12.5667
	Tc/R	0.0191525	0.000238095	1.13559	0.384995	0.650106
	Date	180711
	Donor	6092-9093-6094		deltatciR pMEbisCD
	Recipient	2744
	Conditions	liquid MM succinate for 24 hours, IPTG 0.1 mM for donor not for recipient, mix donor with recipient 1:2, spread 20 uL on 0.2 um Sartorius filter on MM sucinate 0.01 mM IPTG plate for 48hours
	clones	1	2	3
	D	700	292	410
	R	55000	153	41000
	Tc	1460	7	4400	average	Sd
	Tc/D	2.08571	0.0239726	10.7317	4.28046	5.68125
	Tc/R	0.0265455	0.0457516	0.107317	0.0598714	0.0421964
	Date	180725
	Donor	6095-6096-6097		delta bisR pMEbisCD
	Recipient	2744
	Conditions	liquid MM succinate for 24 hours, IPTG 0.1 mM for donor not for recipient, mix donor with recipient 1:2, spread 20 uL on 0.2 um Sartorius filter on MM sucinate 0.01 mM IPTG plate for 48hours
	clones	1	2	3
	D	5700	20	116
	R	101000	162000	106000
	Tc	4000	16	488	average	Sd
	Tc/D	0.701754	0.8	4.2069	1.90288	1.99594
	Tc/R	0.039604	9.87654e-05	0.00460377	0.0147688	0.0216255
	Date	181023
	Donor	6135-6138-6141		delta bisD pME6032
	Recipient	5690
	Conditions	liquid MM succinate for 24 hours, IPTG 0.1 mM for donor not for recipient, mix donor with recipient 1:2, spread 20 uL on 0.2 um Sartorius filter on MM sucinate 0.01 mM IPTG plate for 48hours
	clones	1	2	3
	D	86	79	77
	R	22200000	11400000	26200000
	Tc	0	0	0	average	Sd
	Tc/D	0	0	0	0	0
	Tc/R	0	0	0	0	0
	Date	190128
	Donor	6330-6334-6338		delta bisD pMEbisCD
	Recipient	2744
	Conditions	liquid MM succinate for 24 hours, IPTG 0.1 mM for donor not for recipient, mix donor with recipient 1:2, spread 20 uL on 0.2 um Sartorius filter on MM sucinate 0.01 mM IPTG plate for 48hours
	clones	1	2	3
	D	5900	6500	8200
	R	288000	1030000	1130000
	Tc	190	24	16	average	Sd
	Tc/D	0.0322034	0.00369231	0.00195122	0.0126156	0.0169858
	Tc/R	0.000659722	2.3301e-05	1.41593e-05	0.000232394	0.000370105
	Date	190128
	Donor	6328-6332-6336		delta bisD pMEtciR
	Recipient	2744
	Conditions	liquid MM succinate for 24 hours, IPTG 0.1 mM for donor not for recipient, mix donor with recipient 1:2, spread 20 uL on 0.2 um Sartorius filter on MM sucinate 0.01 mM IPTG plate for 48hours
	clones	1	2	3
	D	158000	22000	18700
	R	600000	360000	1740000
	Tc	0	0	0	average	Sd
	Tc/D	0	0	0	0	0
	Tc/R	0	0	0	0	0
	Date	190128
	Donor	6329-6333-6337		delta bisD pMEbisR
	Recipient	2744
	Conditions	liquid MM succinate for 24 hours, IPTG 0.1 mM for donor not for recipient, mix donor with recipient 1:2, spread 20 uL on 0.2 um Sartorius filter on MM sucinate 0.01 mM IPTG plate for 48hours
	clones	1	2	3
	D	36800	14300	35200
	R	400000	1370000	820000
	Tc	0	0	0	average	Sd
	Tc/D	0	0	0	0	0
	Tc/R	0	0	0	0	0
