# Supplementary material for: An analog to digital converter controls bistable transfer competence development of a widespread bacterial integrative and conjugative element
Source: eLife. 2020 Jul 28;9:e57915. doi: 10.7554/eLife.57915 (PMC7423338; doi:10.7554/eLife.57915)
Supplement: Figure 5—source data 1. [file elife-57915-fig5-data1.xlsx]

## Sheet: Sheet1
PalpA
File		plasmid	relevant gene order	MEDIAN		Strain	AVER_MEDIAN	AVEDEV_MEDIAN					TTEST	MEDIAN
20190925_5503a		pME6032	no insert	36.5		pME6032	32.1667	8.77778					pME6032<pMEbisR	0.019083
20190925_5503b		pME6032	no insert	41									pME6032<pMEEPST	0.0300547
20190925_5503c		pME6032	no insert	19									pME6032<pMEbisDC	0.037293
													PME6032<PALPA	0.0220578
20170405_48_5821		pMEinrR	inrR	18.913		pMEinrR	18.8913	0.198068		technical replicates, each 300 cells			pME6032<pMETCIR		0.317312
				19.1667
				18.5942
20190925_5587a		pMEtciR	tciR	52.8261		pMEtciR	38.3527	9.64895
20190925_5587b		pMEtciR	tciR	26.4058
20190925_5587c		pMEtciR	tciR	35.8261
20190227_5561_72		pMEbisR	bisR	1186.32		pMEbisR	1483.25	874.738
20170725_48h_5561-0.2		pMEbisR	bisR	2415.59
20180118_5561_24h		pMEbisR	bisR	847.855
20161130_5560		pMEalpA	alpA	3.27536		pMEalpA	3.27778	0.109501
20161110_5560_24h		pMEalpA	alpA	3.11594						technical replicates, each 300 cells
				3.44203
20170823_5893_24h		pMEbisD	bisD	9.52174		pMEbisD	22.5097	13.6216
20171215_5893_72h		pMEbisD	bisD	42.942
20180118_5893_24h		pMEbisD	bisD	15.0652
20170823_5892_24h		pMEparA	parA	23.8841		pMEparA	36.1763	15.7713
20171215_5892_72h		pMEparA	parA	59.8333
20180118_5892_24h		pMEparA	parA	24.8116
20190220_6065a_48h_+		pMEbisDC	bisDC	42.7536		pMEbisDC	52.4348	6.45411
20190220_6065b_48h_+		pMEbisDC	bisDC	54.2609
20190220_6065c_48h_+		pMEbisDC	bisDC	60.2899
20161110_5533_24h		pMEbisC96	bisC-orf96323	3.24638		pMEbisC96	4.09662	1.49114
20161130_5533		pMEbisC96	bisC-orf96323	2.71014						technical replicates, each 300 cells
				6.33333
20180131_4594+_48h		pMEEE6.4PstI	parA-shi-bisD-bisC	395.087		pMEEE6.4PstI	276.411	123.346
20170727_4594_48h		pMEEE6.4PstI	parA-shi-bisD-bisC	91.3913
20180503_6081_24		pMEEE6.4PstI	parA-shi-bisD-bisC	342.754
20180503_48_6082		pMEEE6.4alpAPsti	alpA-parA-shi-bisD-bisC	31.2319		pMEEE6.4alpAPsti	29.0097	4.60064
				33.6884
				22.1087
381		501.249
				16.7228
			29.8238
						48_6065c+
					-1.5942
324		536.046
340		605.029
444		350.077
374		963.473
425		33.7718
327		748.156
343		515.682		19.1319
446		259.816	21.6548	19.0581
337		124	22.7895	20.9102
353		773.292	27.123	20.4902
			23.3079	20.9529
363		49.5895	25.8994
				19.0347
358		692.115	21.9458			48_6065c+
				20.5552	-7.53623	48_6065c+
			21.313	21.7952	-3.78261	48_6065c+
			26.135	19.5791	-10.2754	48_6065c+
474		127.785	21.9917	18.1653	0.536232	48_6065c+
			24.8438		-13.5362
				19.4315		48_6065c+
316		170.693	23.8625		-1.05797
				19.1823		48_6065c+
			23.8504		-5.65217	48_6065c+
					-7.57971	48_6065c+
334		195.072			-12.8261	48_6065c+
				20.5733	0.318841
376		247.362	29.4231			48_6065c+
					-2.46377
				18.9025		48_6065c+
			21.369		0.434783
329		199.453
449		281.14		18.7985		48_6065c+
			22.7138		0.724638
				18.6184
			25.81			48_6065c+
					-2.31884
279		91.0251
				19.803		48_6065c+
318		60.3019	21.2152	20.5047	-3.94203
			27.9738			48_6065c+
					-3.97101
				17.2779
			20.619			48_6065c+
					-1.04348	48_6065c+
321		257.794		18.9854	0.637681
			21.3983
						48_6065c+
					-3.86957
						48_6065c+
				19.7487	-5.65217
			20.7659
						48_6065c+
					-1.62319
281		524.402
				18.9428
			19.8149
						48_6065c+
					0.565217
315		59.5143
				17.3379
			23.3272
						48_6065c+
					-4.86957
416		177.873
468		276.84
349		124.834
346		229.803
508		534.226
368		196.641
510		644.833
299		228.308
401		281.075		20.6099
423		145.397	25.7783	21.1757
358		321.304	28.2116	20.6852
431		420.55	21.538	20.1028
			21.9881	22.3416
388		37.0026	29.0629	20.8631
			22.5247	20.8135
421		142.836	31.4365	18.6457		48_6065c+
333		206.414	20.4915	19.5016	-10.2029	48_6065c+
402		176.373	26.3034	20.5075	-2.92754	48_6065c+
450		286.482	26.3356	20.186	-11.5797	48_6065c+
			22.6459	20.4888	-6.76812	48_6065c+
			26.864		-2.42029	48_6065c+
				20.6332	-7.71014	48_6065c+
			24.005		-3.01449	48_6065c+
				20.3142	-4.26087	48_6065c+
			26.4983	19.4523	-2.91304	48_6065c+
424		94.4623	21.8785	21.843	-4.30435	48_6065c+
			23.5047	19.2031	-3.85507	48_6065c+
			30.0288		-2.97101
						48_6065c+
					-5.50725
						48_6065c+
					-0.0289855	48_6065c+
					-2.68116	48_6065c+
355		170.372		20.3024	0.0144928	48_6065c+
340		71.0735	26.6719		-2.86957
						48_6065c+
				20.0353	-1.75362
			22.6356	20.0125
			21.6898
						48_6065c+
					0.681159	48_6065c+
					0.594203
