# Supplementary material for: An analog to digital converter controls bistable transfer competence development of a widespread bacterial integrative and conjugative element
Source: eLife. 2020 Jul 28;9:e57915. doi: 10.7554/eLife.57915 (PMC7423338; doi:10.7554/eLife.57915)
Supplement: Figure 5—source data 2. [file elife-57915-fig5-data2.xlsx]

## Sheet: Sheet1
P putida UWC1 PalpA-egfp			fluorescence values per cell
	qqplot_5d_6065-		qqplot_5d_6065+		qqplot_72h_5561		qqplot0030_4489		qqplot6081_24		qqplot6082_48.pdf
	BisDC no ITPG		BisDC plus IPTG		BisR		parA-shi-BisD		parA-shi-bisDC		alpA-parA-shi-BisDC
	50.029		16.5072		952.319		39.3913		547.725		6.42029
	37.087		29.6377		1219.51		14.7681		360.493		3.34783
	52.7391		27.2754		1417.67		19.5942		198.71		11.913
	43.5797		31.1884		644.681		15.7246		646.826		37.9565
	23.9275		63		1281.04		39.8551		411.609		34.5072
	36.6522		6.95652		1220.75		37.9565		291.783		37.2174
	42.6667		35.4058		984.13		28.6812		292.464		34.1449
	41.1739		44.058		1196.49		25.3043		182.188		22.6957
	43.0725		51.7391		3092.77		46.0725		199.232		22.3913
	35.7391		89.3768		1018.35		34.5362		502.855		16.029
	37.4203		83.1594		1150.67		33.4058		339.551		22.5072
	82.3768		198.261		1043.8		47.8551		542.13		20.0435
	34.2899		71.9565		2468.75		28.7246		189.42		19.8261
	56.5942		47.1884		1949.01		57.4928		126.188		19.4638
	34.3768		35.2319		1524.91		33.2319		429.507		11.2464
	102.594		47.2899		949.812		31.0435		403.217		35
	31.5217		64.0145		1240.83		31.4493		159.855		10.8696
	99.3333		47.7101		1026.38		59.8986		181.652		12.2464
	129.478		92.6232		817.217		79.8406		364.71		3.69565
	68.1594		442.899		1748.03		104		625.232		12.0725
	87.3913		62.942		2077.58		106.101		199.58		14.058
	49.6232		69.1159		1839.35		43.9275		534.087		89.5217
	105.855		77.5217		1361.12		25.7826		130.71		18.6377
	41.7536		131.377		1230.62		12.2174		97.0435		19.6812
	50		65.7971		1215.06		37.2899		427.971		21.3623
	44.087		77.7826		2545.81		70.2899		250.29		13.8986
	149.478		111.913		1013.19		69.971		135.681		44.2319
	27.2754		69.1449		1462.55		28.3623		456.391		13.8696
	114.812		84.2754		13.8986		85.5652		619.58		31.5217
	41.6377		65.6957		1959.68		20.971		294.043		33.3623
	58.7101		79.913		1446.46		32.4928		168.565		56.2464
	37.2609		37.5652		1570.78		45.1304		440.159		30.3333
	60.942		59.3188		1385.51		64.5507		265.942		51.6957
	41.8261		63.8841		1016.48		51.7971		604.348		28.7826
	59.4638		62.6087		1396		29.6812		10.8696		107.377
	71.9855		44.1159		1017.64		26.3188		264.478		79.8406
	33.1449		129.565		577.783		31.7391		493.522		15.4783
	43.0725		96.1884		2346.81		53		225.159		23.5942
	40.029		70.2609		2569.39		97.4638		132.754		32
	98.8261		79.1449		1784.26		29.9855		442.536		31.5507
	63.5652		62.6522		1205.64		43.0145		412.348		44.5797
	92.1304		49.6957		1570.12		66.8406		380.043		113.029
	60.1739		53.3768		2279.26		22.0435		131		21.913
	34.1449		84.6377		1899.09		17.3043		129.377		37.5362
	129.188		59.6087		1857.19		23.4783		499.072		16.1159
	109.768		52		2248.74		5.98551		84.4493		24.2174
	46.8551		71.2319		2048.36		4.84058		384.884		43.1014
	124		88.8551		2176		99.4203		478.246		29.6377
	142.377		102.986		-33.1884		52.3623		291.348		33.6377
	61.9565		62.4348		1956.06		46.7101		378.217		15.8986
	56.3478		89.2899		1693.1		36.5652		108.913		38.4638
	67.7971		141.783		1605.77		121.058		78.6522		43.9565
	62.087		64.1594		1368.99		51.4493		224.391		27.2319
	54.1014		66.5072		1220.88		39.2174		71.1594		25.3768
	60.4058		48.2899		1274.33		43.1014		114.928		25.5942
	145.014		69.2319		1430.48		15.4058		306.754		22.6812
	64.3768		73.5072		1175.84		32.5362		423.957		48.3768
	61.5507		49.913		2601		118.855		468.681		14.2464
	106.145		37.7246		2558.28		48.8986		592.435		40.5797
	130.304		74.6812		1358.97		48.913		423.13		20.9855
	131.623		74.7246		1250.32		50.6522		239.667		34.0435
	65		35.0725		1940.86		37.4783		105.899		15.2319
	124.087		82.971		2595.88		78.8116		76.7681		40.3623
	113.725		53.942		-37.4928		45.1739		344.507		43.4203
	55.9565		29.942		2652.33		123.275		833.029		90.0145
	66.8116		44.971		2001.45		52.6377		340.29		16.3333
	164.116		54.971		2374.62		66.2319		631.217		30.1739
	128.942		50.1159		-34.5362		160.681		288.942		12.4638
	64.8116		60.4493		1456.77		45.6377		202.942		26.4493
	43.3623		40.6667		1193.93		39.971		274.159		43.4783
	52.7826		54.7101		2348		69.6522		243.014		10.7101
	54.6812		56.971		2270.09		64.8261		70.058		24.2174
	111.304		139.855		3832.14		24.7101		259.87		74.4783
	64.8406		69.1304		1914		110.478		586.435		30.3043
	54.4638		61.7681		2216.99		161.855		813.348		17.3478
	52.9275		98.0435		1961.58		43.6957		191.435		15.3768
	20.7391		83.5217		3253.38		58.4203		276.377		22.3478
	40.1594		59.9565		1988.39		46.1449		686.174		97.2754
	105.29		83.6087		2525.65		108.594		193.58		26.5942
	53.7101		98.2029		1783.86		38.6522		281.13		30.8551
	55.5507		109.536		2889.68		30.9855		20.029		33.4783
	53.5072		146.014		2308.94		41		78.7826		20.0145
	57.4058		90.5797		1447.09		1.05797		448.638		17.8406
	64.7826		103.928		2134		32.942		754.986		19.0435
	54.1449		93.0435		1575.78		67.0145		637.246		49.0145
	125.797		113.609		1710.33		35.6957		446.087		22.5507
	53.8841		112.768		1758.28		60.1304		146.565		37.2609
	26.1159		54.6957		8667.97		38.7246		276.768		82.3333
	34.087		97.3768		1688.36		43.5942		125.957		24.3188
	34.7971		61.5072		1643.14		46.8116		276.449		38.6957
	25.7101		75.4638		2279.17		92.7681		538.696		21.4348
	50.8841		62.4058		1848.84		111.725		288.435		29.4783
	39.029		110.029		2734.8		42.1739		599.217		36.8696
	68.2029		51.4493		2464.36		30.4493		622.203		51.0435
	13.6812		93.971		2169.51		22.1884		24.5652		26.7101
	18.3623		89.9855		2808.32		30.2754		464.725		68.087
	14.2174		64.7536		2251.8		18.8986		447.362		32.1884
	16.5942		52.6522		1661.96		75.8841		813.043		73.8696
	26.0145		103.072		2500.87		9.75362		299.391		24.6667
	36.4928		77.4493		2106.99		38.8841		518.29		199
	24.087		60.4928		1739.13		43.0435		308.681		149.696
	69.7391		45.1014		2812.68		1.49275		409.493		40.3333
	26.058		4.31884		2572.93		50.2609		104.101		56.029
	39.5942		889.884		2087.91		27.8261		432.928		23.0725
	32.7536		230.652		1832.39		39.8696		158.928		45.3188
	13.2319		104.928		2866.91		23.3478		-3.01449		89.1449
	51.2319		2102.29		2234.14		14.2029		394.841		44.6232
	66.9275		89.5507		1871.61		34.0725		202.986		38.942
	68.3478		87.5652		2103.33		26.2174		483.71		60.3333
	25.9275		76.7971		1980.04		37.8261		47.2754		95.8841
	63.8261		125.536		3793.57		41.4203		270.203		56.6522
	33.6377		82.8551		1971.74		156.246		791.261		29.1449
	49.4928		85.8406		1340.17		51.7681		287.565		50
	35.1884		160.681		2671.94		156.783		518.478		65.8696
	33.8696		90.4638		2983.13		51.6957		343.232		47.2609
	42.2319		95.1159		2312.88		42.5072		537.377		30.0725
	65.4638		273.377		1165.91		71.0145		271.145		45.3478
	45.8551		60.971		5326.51		81.3768		429.043		29.2319
	63.9275		73.6087		2544.2		52.2899		585.217		76.058
	21.2464		126.159		3314.12		93.4928		122.246		40.9855
	67.8406		114.493		1815.04		32.4493		156.652		160.783
	36.5797		63.1594		1917.17		63.5652		406.188		50.8986
	45.3478		95.3333		2424.61		142.826		119.319		30.1014
	27.0435		86.0725		2807.03		46.5362		688.246		57.8551
	93.029		112.377		2061.81		45.1304		167.42		36.0725
	36.2029		110.42		-20.3623		29.6667		491.783		56.2319
	44.7391		80.5507		4091.12		47.3333		159.971		123.42
	45.7536		47.1594		5474.45		86.0145		568.261		20.5507
	43.3043		142.536		1913.48		49.1304		243.406		24.3913
	42.4348		180.362		2633.86		60.4928		459.841		41.6377
	70.4783		77.087		1830.39		37.4058		168.855		61.3623
	48.3043		89.9855		3957.72		6.28986		480.957		61.058
	38.1304		51.2464		2543.87		43.1739		511.725		29.4203
	48.6232		77.2609		2278.83		111.391		825.348		55.3623
	36.2319		84.4348		1491.9		83.4493		150.971		62.7826
	73.2899		64.6232		1433.83		41.4493		552.319		75.4348
	28.2754		101.406		1648.19		42.6522		146.333		42.6667
	55.5942		68.2899		2239.06		68.5652		559.928		28.7246
	69.8551		87.8261		1869.52		18.8116		788		98.0435
	54.8406		86.2899		3345.75		38.4348		259.116		17
	57.6377		74.3623		1737.2		81.5507		922.797		76.3913
	60.5797		41.8116		2401.04		65.2319		689.058		26.4348
	39.3188		97.9855		1954.48		72.8551		531.029		48.6812
	83.8986		64.6087		2965.86		53		236.986		36.4348
	48.9275		81.4928		2014.29		37.0725		200.13		25.0435
	31.2319		61.7681		2058.01		51.7246		333.13		43.1739
	28.3043		150.362		2480.87		61.8261		432.855		-8.94203
	148.551		68.1449		2395.45		36.7826		257.71		21.913
	53.2029		63.4638		1085.06		48.971		193.826		61.3913
	33.3188		69.2899		1584.32		149.493		688.406		10.2609
	62.5942		33.0725		1131.41		69.942		495.333		17.0725
	46.7536		8.49275		1737.45		55.6522		219.739		13.8406
	62.3478		6.92754		2219.03		91.7536		951.899		21.0725
	51.3333		52.6087		1210.16		27.3333		774.435		8.07246
	35.6087		9.91304		1723.75		104.304		82.058		23.4493
	45.1884		80.6957		1816.33		70.5507		271.551		35.6957
	37.7971		24.2464		1238.55		72.7246		775.101		17.8116
	76.7246		50.4058		1578.48		40.8986		20.2029		35.7971
	78.9855		37.1739		2169.61		65.5507		185.145		87.0435
	92.4638		21.7246		2157.3		89.5217		186.246		39.058
	73.3043		20.7536		1982.3		35.5652		536.348		10.5507
	44.9855		76.4928		1295.81		49.1014		696.522		54.1739
	71.8551		35.4058		2282.96		49.2319		766.275		32.2754
	53.3043		36.913		1507.68		41.1594		-0.782609		60.4203
	56.2029		52.3188		1234		18.5507		398.333		37.2029
	62.6957		77.8986		2181.55		27.6377		792.638		24.7971
	102.029		47.2609		1885.91		58.3188		211.754		9.72464
	114.362		47.6522		2227.2		28.5797		188.304		31.2319
	38.4348		23.087		2789.83		49.8551		770.493		35.7391
	111.971		35.6087		2596.45		24.3478		251.478		38.7826
	123.754		37.3043		2215.96		24.8696		697.522		23.2464
	42.1304		53.7101		1299.72		31.3913		157.87		20.4783
	57.3043		44		1589.61		36.5507		278.13		16.2174
	41.3623		30.058		2953.68		21.0145		765.855		22.3333
	115.449		35.058		2255.97		35.6667		514.261		28.2319
	27.8551		93.2319		1435.2		48.8696		554.536		58.4638
	52.5942		49.3478		1854.39		49.6377		873.275		33.4493
	51.058		40.2174		2169.71		20.4638		208.696		56.4348
	54.5507		16.1159		1211.16		49		125.493		34.8261
	9.71014		42.4348		2997.54		31.3333		155.29		29.1159
	90.4928		68.2174		1664.58		32.9565		424.261		97.8406
	40.6812		73.4928		1712.88		60.2899		495.203		41.8551
	79.3623		45.0145		2089.26		37.1304		225.333		21.4928
	25.4493		115.174		3400.54		30.2899		858.377		46.0725
	55.1739		20.4348		2205.91		62.3188		367.348		22.4203
	129.188		105.739		1788.72		32.3478		435.696		66.087
	47.1014		46.2609		1341.7		37.2609		132.42		22.8986
	29.7826		74.6667		2551.14		58.5217		514.072		21.2609
	61.1159		109.609		2245.07		61.4203		234.029		17.087
	30.087		52.6087		2460.68		48.3043		672.319		29.913
	30.1594		62.9855		3040.03		56.3768		6.07246		33.971
	29.7536		53.0435		1269.38		45.1739		686.797		50.087
	42.6232		51.6957		2413.2		35.913		232.71		28.7101
	59.1739		57.4783		3152.99		13.7101		505.826		20.0435
	37.2174		65.913		1989.77		50.058		105.58		19.5507
	34.9565		68.913		3408.97		43.7246		480.739		35.0435
	27.942		53.9855		2497.94		61.4058		538.725		26.8841
	40.1739		35.4348		1801.14		95.6957		566.71		17.9565
	51.2174		56.1449		2531.84		38.3333		496.623		33.1594
	40.1739		46.5072		1741.65		8.23188		241.362		15.2029
	49.7391		47.2319		2923.83		19.4203		120.681		29.9275
	74.8696		48.7246		3302.25		22.1594		535.768		24.4203
	30.6957		3.50725		1416.39		21.5797		603.319		17.4493
	70.029		37.6522		4147.45		27.3333		43.4783		39.7246
	115.087		74.3478		2548.57		14.1449		405.942		49.087
	29.4348		106.551		2118.55		20.7826		465.551		16.3913
	49.2029		45.3478		2311.68		47.8406		103.667		27.1884
	41.4638		16.1884		2166.81		33.5072		456		21.5362
	22.8116		64.8116		3275.07		52.2754		216.406		17.9565
	43.087		27.2029		3047.58		24.7246		463.159		28.9565
	87.0145		57.2754		1952.51		24.6522		107		39.1014
	77.9855		49.7246		3166.67		44.2754		372.29		24.7246
	41.4783		76.971		2207.39		49.6522		789.464		43.1159
	44.4203		94.8406		2940.2		34.7101		146.348		19.2754
	46.1739		126.464		2483.41		45.5362		58.8406		22.6522
	35.971		47.7971		3608.1		45		1012.7		31.1304
	59.8261		67.0145		2430.2		59.4058		10.971		9.78261
	104.42		58.8116		2115.9		62.6957		550.261		21.6522
	56.2029		71.5797		3269.62		103.899		566.246		21.6957
	116.029		94.6812		2446.39		37.9275		666.391		18.4203
	45.971		44.9565		2244.26		33.9565		660.116		10.8261
	47.5797		59.3913		2663.8		44.8551		140.594		37.6232
	84.8986		28.6667		2378.77		10.6812		292.464		12.5942
	166.42		47.1739		2267.46		23.6522		386.159		29.8261
	53.6667		53.7826		1980.59		43.3623		332.058		31.6957
	121.449		63.1594		2981.3		34.8841		756.188		11.1594
	67.4348		38.8551		3263.58		23.087		1172.2		20.7391
	72.5507		99.6667		2701.99		32.2609		675.116		23
	61.913		86.9565		2397.48		27.4058		200.913		32.087
	94.2754		63.8696		2012.17		74.8986		405.348		41.1594
	72.7101		49.4493		2866.3		34.1304		254.435		9.85507
	16.0725		235.565		1717.7		22.0145		161.841		44.0435
	41.5217		63.6957		1692.81		33.3188		435.58		24.6667
	41.1304		43.913		3145.03		83.1449		159.928		20.2029
	119.406		96.7536		2988.97		16.971		1138.96		106.826
	89.3623		52.1159		2150.35		30.6087		599.449		23.1739
	49.1304		56.5362		1075.36		38.3913		545.594		29.029
	48.8406		46.058		2157.58		19.8696		563.754		16.5362
	67.0435		26.7826		4291.36		29.5942		329.681		26.8696
	50.2174		62.4928		2485.81		5.07246		621.913		25.0725
	41.5942		137.029		2228.94		99.1884		129.884		67.5942
	58.8986		63.8116		3136.17		21.9565		204.406		58.6377
	37.9565		44.1449		2848.14		36.7391		141.826		34.3478
	102.333		34.4928		2758.64		90.4783		-2.66667		37.8841
	58.4348		60.6377		2712.99		29.0435		597.536		20.5507
	39.6377		80.8696		1602.48		51.8841		128.101		19.0145
	198.232		91.4203		3538.04		42.5507		169.754		52.2174
	150.652		127.667		1969.41		14.7391		376.101		22.3188
	109.029		63.2754		1471.45		35.4058		319.072		77.9275
	31.913		227.435		2344.41		37.1159		504.232		33.4348
	49.5507		94		2043.75		34.4348		414.913		45.9275
	55.6377		47.3043		2859.29		82.5797		70.8696		113.565
	82.6087		159.739		3969.2		22.1304		-3.6087		47.8696
	46.7536		26.6957		2088.78		44.6957		14.6522		81.7536
	35.9855		123.246		3466.13		29.6522		501.812		35.5942
	62.4348		94.8841		2442.3		23.7536		128.609		14.3333
	48.5362		47.9275		2113.84		38		692.464		41.5217
	54.4638		37.1449		2261.28		31.5072		189.768		83.8116
	37.087		46.2319		3667.9		24.5797		296.493		46.942
	27.5362		26.7536		2794.29		31.6667		599.101		34.8696
	18.5507		56.7246		2504.72		35.087		113.275		42.029
	38.8696		66.029		3573.59		44.3768		247.464		76.7536
	37.2029		93.0145		3079.58		48.7826		86.2029		64.6522
	70.1449		66.7246		4011.8		76.2609		562.826		29.6522
	76.4058		74.3188		3584.23		52.4638		551.913		92.5217
	41.1594		39.7826		3999.52		57.058		287.87		68.6522
	31.4493		89.058		3554.06		37.1739		120.493		41.8116
	99.5362		67.9275		3096.16		62.2029		276.13		24.2899
	117.986		44.8696		3338.39		71.5362		93.2899		39.2754
	101.638		62.058		2108.1		26.5942		478.319		33.0145
	47.6812		83.942		2926.23		63.8696		596.594		48.7536
	74.029		58		2622.1		52.2754		483.71		94.913
	75.8696		149.377		4617.14		50.6232		486		21.4203
	68.4783		68.1739		2809.43		37.7536		268.13		34.8986
	76.8986		41.1739		3814.86		29.7971		661.768		18.3913
	52.4638		21.2174		2955.1		30.4928		235.551		37
	49.4928		33.1304		2392.96		38.5797		433.406		24.4203
	104.783		55		5359.17		110.188		95.6812		23.058
	78.8116		35		3313.35		59.5652		506.101		-3.5942
	95.6812		47.1304		2845.81		41.2464		536.275		92.087
	48.7246		37.2464		2394.86		24.7826		160.609		61.971
	58.0725		25.0435		4113.9		52.6232		139.71		25.6377
	113.957		79.942		3102.81		107.043		618.478		46.7681
	55.8986		39.5797		3490.19		39.4348		639.203		37.6667
	55.0725		28.8551		2605.96		36.4058		409.188		47.3623
	32.7246		46.8261		2832.55		38.8406		123.13		38.5507
	38.7971		54.7971		2331.74		26.8986		441.942		21.029
	93.7971		52.4928		5434.14		30.1304		1238.8		56.2319
	82.1594		201.13		3318.54		24.029		609.913		27.3043
	52.0725		45.942		2107.57		42.9565		420.246		32.3043
	43.058		52.0145		4084.04		71.3623		333.681		18.8986
	-0.275362		141.043		4882.16		35.9565		161.217		43.2609
	61.3333		32.6232		3962.14		63.5072		313.391		63.7826
	73.7826		35.4638		3880.87		106.159		281.594		66.5362
	53.8116		111.609		2964.17		59.7971		634		52.8551
	106.986		41.7391		4029.62		45		39.3913		9.97101
	59.7101		70.058		3632.75		105.841		729.449		20.6377
	51.1739		66.1594		2111.67		15.058		546.739		10.3913
	61.3478		110.275		2850.83		17.6377		400.464		30.8551
	97.0145		56.1159		2097.7		35.8261		343.652		21.3478
	22.4058		58.7681		2803.13		95.6812		529.594		11.913
	32.029		62.4058		3700.93		43.5362		421.058		24.3043
	24.3043		217		3746.25		19.6522		7.62319		66.1449
	27.1449		69.9565		3099.68		43.3768		282.638		34.4928
	23.3043		53.4348		2414.49		61.5652		473.986		34.1014
	25.1884		87.2609		3631.41		50.1594		242.797		100.652
	97.1449		86.2029		3760.32		55.9565		422.217		41.5652
	13.0435		80.3623		1535.3		54.8986		267.101		53.6377
	27.5217		30.7536		4656.51		61.2029		307.739		60.087
	40.4058		81.6377		3436.28		103.681		334.87		37.5507
	47.2029		35.0435		2368.45		30.1449		606.565		31.8261
	57.7971		62.4493		3652.67		43.8261		289		43.1739
	28.1014		136.594		2706.23		21.8406		693.638		37.6667
	46.6522		30.2899		3690.77		31.2754		218.899		41.8261
	50.7391		70.058		4119.51		18.1304		402.696		49.7246
	65.913		76.4203		4352.23		58.5072		732.232		75.2319
	62.7536		54.1304		2448.87		21.6087		367.551		31.0145
	-6.15942		51.4638		3265.55		30.6667		550.841		41.1304
	24.058		53.4493		2223.38		46.4783		342.319		32.6812
	28.1884		27.5942		2802.78		43.1304		279.145		25.4493
	44.971		23.3333		1898.59		18.9275		837.913		51.8406
	27.5942		46.9275		4079.13		27.058		854.826		78.3478
	50.087		50.5652		573.203		62.9275		511.406		46.3478
	30.2609		51.7826		230.246		27.2464		520.464		109.406
	89.6957		50.1594		731.014		66.5652		3.92754		54.1594
	29.0725		78.6957		840.333		21.4203		753.594		83.6377
	34.4348		56.5942		683.507		39.7391		909.841		29
	45.4348		72.8261		854.638		18.6957		481.435		23.2754
	41.2319		111.435		706.304		23.1159		374.754		30.9275
	44.3913		64.7826		530.188		36.0145		175.551		39.1449
	38.1159		127.29		448.667		44.3913		316.043		75.1449
	27.5217		60.7971		517.507		27.1884		668.333		38.6087
	139.899		34.2464		276.174		37.3188		895.014		24.8841
	92.6232		55.971		847.232		27.4783		248.087		36.6232
	34.087		37.942		709.174		34.7101		573.188		29.9565
	66.3333		37.8986		774.812		90.5362		209.014		27.4638
	38.8116		38.029		503.217		39.1594		475.145		32.2754
	30.6522		40.8551		968.812		22.0435		527.275		50.5942
	38.4928		50.5217		787.986		29.3478		217.348		48.5942
	48.4783		38.058		492.551		62.2899		587.116		40.3623
	52.7971		25.8406		584.551		34.087		453.725		47.9565
	108.493		74.1449		948.971		38.8551		689.159		59.6522
	49.7681		37.8261		-48.6377		100.261		911.391		33.8841
	26.2609		95.8261		508.203		31.8986		221.101		43.0145
	87.1014		142.536		1883.74		46.058		604.058		48.2754
	29.2609		31.3768		363.609		32.971		544.435		52.4638
	36.4638		14.1739		4003.23		61.6957		263.014		34.6812
	143.406		43.1884		663.797		34.1014		93.6377		36.9565
	69.8696		44.2029		839.217		40.9855		180.333		7.07246
	28.6522		144.493		292.377		26.3768		123.348		26.6377
	75.8116		27.0145		885.841		28.8986		6.44928		29.8116
	96.6377		69.971		144.029		53.1304		509.13		35.4638
	27.6667		59.913		474.377		33.1449		492.449		-3.10145
	92.5217		61.3913		781.855		51.087		464.942		44.4783
	42.8841		44.971		481.942		35.2754		223.333		15.5797
	57.5507		58.7826		674.536		63.8116		-0.710145		27.5217
	57.1014		75.2174		728.928		46.2899		271.449		37.4058
	46.6957		54.7101		1491.55		69.3478		127.333		18.2174
	54.7391		42.6522		855.783		50.9565		118.391		39.4638
	103.043		80.2029		358.986		41.1739		361.522		16
	149.609		97.7971		737.797		66.1304		441.565		55.9855
	83.0725		72.6957		570.652		23.4203		80.7681		38.1014
	39.0725		40.4058		1641.87		29.913		163.13		30.5072
	39.8696		43.3623		1416.88		52.7681		209.29		61.6957
	37.7536		73.3913		610.145		-4.82609		136.493		7.01449
	28.3768		79.058		917.725		0.956522		72.1449		24.3478
	53.2464		54.6957		1750.7		-2.69565		453.116		24.3768
	56.8696		98.5507		640.783		-0.217391		1.82609		19.8116
	24.0435		60.058		592.435		5.82609		95.2174		41.6087
	28.7681		81.4928		836.478		2.73913		265.913		16.6232
	40.6522		83.0725		1099.16		6.5942		12.3623		108.522
	19.1304		57.2029		248.87		76.029		163.449		24.6522
	33.913		43.1739		766.275		3.15942		156.551		19.3188
	35.2754		73.6957		856.812		1.05797		416.986		27.1739
	85.7681		91.9855		821.913		3.3913		587.29		36.9565
	57.0725		53.7536		474.768		2.43478		130.71		25.1159
	40.6232		67.5362		655.435		-0.521739		95.8986		22.5362
	97.971		59.7681		995.246		1.21739		110.884		35.4348
	40.5797		58.7246		813.536		-1.44928		249.435		56.1739
	48.1449		78.9565		2652.16		0.405797		482.348		15.1304
	114.435		104.304		498.014		1.6087		336.638		22.6957
	58.2029		88.8696		851.174		-0.623188		313.841		39.3913
	46.1304		43.1884		717.043		0.115942		3.31884		16.971
	26.0725		16.1159		1467.43		6.24638		87.9855		38.5652
	84.8406		70.2029		652.449		1.85507		525.493		53.3333
	96.4058		51.7826		1418.13		1.91304		419.986		42.2029
	75.3188		56.3188		451.986		-0.0869565		675.913		48.1014
	66.8696		76.1014		767.507		1.89855		7.31884		31.6377
	128.928		62.4638		885.536		8.21739		57.8406		16.4638
	98.3913		110		568		2.7971		725.522		27.7391
	45.1159		53.7681		922.884		-2.68116		242.275		37.6522
	204.594		46.0435		412.754		2.50725		189.594		35.2754
	75.3333		862.739		416.159		-1.4058		186.652		17.4058
	35.6232		65.4348		1006.94		-2.86957		317.261		59.9275
	41.913		63.5072		890.101		3.36232		172.971		17.1449
	55.3478		65.1449		792.623		-4.11594		232.551		38.2609
	38.5217		30.3768		782.072		-2.71014		165.536		39.8406
	48.0725		123.58		410.812		-0.507246		795.681		27.2754
	90.5362		45.7826		892.928		-0.347826		645.464		12.7391
	38.1159		113.609		1353.54		-3.75362		519.594		25.1159
	77.7391		44.4203		524.13		-5.17391		567.928		37.3478
	44.4638		47.2609		224.101		-3.07246		461.159		48.0435
	65.7536		61.8261		627.725		-1.68116		309.551		26.6087
	79.1739		59.5507		667.652		-6.08696		607.928		22.6667
	99.6812		47.4058		1056.13		-3.11594		191.696		113.855
	40.8406		44.3623		679.681		22.942		699.043		30.6667
	55.3188		152.072		960.841		35.942		522.667		21.7536
	64.8986		80.087		3224.62		35.7391		426.42		21.3478
	57.6377		64.5942		1050		40.1159		385.739		22.9275
	86.5797		56.7536		670.203		36.0725		540.174		23.913
	97.8986		47.3043		530.739		58.3333		445.478		34.4348
	39.3333		133.116		670.942		27.3768		635.58		34.0725
	19.4348		78.7101		350.362		29.087		198.565		31.1014
	51.7681		89.5217		648.087		24.8261		602.058		37.4203
	50.3333		62.8116		1008.96		24.7681		104.478		25.1159
	138.348		91.3623		689.087		46.1014		381.768		25.942
	75.7536		78.4928		1029.72		57.3043		514.116		16.029
	51.4783		83.8696		1448.99		52.1884		113.855		27.2319
	38.2899		96.4783		1047.04		55.0725		550.217		56.6812
	28.3043		106.899		1666.72		173.507		343.348		108.551
	36.8986		49		560.275		71.087		390.391		39.2609
	46.6232		56.2174		971		74.2174		585.913		25.942
	31.9275		67.3768		745.696		44.2609		506.855		24.7391
	23.1449		81.5362		1023.07		47.1739		420.913		21.9855
	20.6087		117.188		805.565		46.7826		269.391		64.4638
	35.9855		37.7826		685.072		40.2899		656.522		19.029
	40.1159		59.1304		723.826		39.3913		405.014		48.4783
	35.4493		42.7101		1284.25		69.3768		422.942		15.6087
	32.7681		40.2319		587.551		66		137.029		19.8696
	67.8406		51.4348		1101.93		52.6232		595.928		11.0435
	48.8261		55.6377		903.464		50.2754		562.087		19.6377
	25.2464		76.2899		871.174		147		355.203		9.52174
	44.3188		29.8696		1537.36		48.3188		19.7971		38.5217
	24.8406		50.5072		961.971		35.6522		116.435		30.4058
	75.2609		30.1739		816.58		62.1449		418.681		27.4928
	22.8841		56.7971		997.029		64.1594		669.29		25.4058
	33.6087		37.029		1085.51		41.2754		323.957		27.5072
	36.6087		37.9855		573.203		58.5942		135.971		40.2174
	26.4058		28.8261		1171.83		28.2609		303.319		16.7391
	43.1304		80.7826		393.899		27.3623		478.594		27.087
	44.8406		26.942		1279.13		38.1014		903.449		43.9565
	39.6667		39.3913		516.13		68.8116		177.043		39.5507
	62.7391		84.2754		718.522		50.2609		376.072		26.7246
	79.4348		46.8696		1812.38		25.7391		551.493		23.3333
	76.8261		52		992.275		29.3043		529.217		25.5072
	119.681		47.9855		1315.1		21.5217		558.116		51.4348
	42.3623		31.913		1741.07		25		342.971		21.2899
	29.7391		50.0435		1485.43		22.6957		720.609		38.1594
	60.8696		128.275		3394.54		25.971		436.203		-0.855072
	100.652		276.232		729.333		76.0725		862.391		64.5797
	78.8116		82.942		2502.94		28.4348		489.507		136.768
	56.8116		96.913		674.101		17.1159		760.971		41.4638
	57.5942		43.0145		722.319		61.2899		636.797		21.5217
	53.942		66.7971		2102.77		18.1159		330.739		35.4783
	47.0145		85.3188		538.029		12.1884		106.087		61.5217
	41.2609		41.7391		359.493		7.84058		427.203		20.3623
	34.7681		119.913		735.406		6.98551		76.6812		49.0145
	68.8261		77.6667		1390.91		6.75362		299.333		16.5072
	126.696		33.4928		439.493		14.2899		628.435		39.6232
	43.5072		61.1449		351.188		21.6087		150.623		33
	31.4783		58.5362		676.101		29.913		295.043		24.3623
	49.942		60.1449		863.043		25.2174		371.116		35.3188
	147.464		48.1159		995.058		16.3043		517.493		19.7101
	36.3478		86.2029		862.043		11.3043		371.406		51.7246
	45.6812		84.1739		858.377		30.8116		691.304		28.1449
	29.5652		70.0435		1483.62		13.1449		404.261		28.5217
	38.4928		51.5797		896.246		10.2464		160.087		33.5797
	49.0435		66.2754		551.536		10.6522		202.159		39.3333
	51.3333		46.2319		474.087		7.81159		127.406		23.5217
	108.565		21.6377		563.087		27.8116		177.797		35.2754
	46.5072		73.5072		884.362		91.2464		596.203		25.2464
	64.2609		192.986		1193.91		13.4058		477.899		25.6667
	44.7971		64.7681		786.913		7.17391		424.058		53.8551
	74.3043		86.0435		1282.78		9.55072		507.841		34.1304
	52.4928		40.6957		899.246		16.2609		654.029		56.971
	49.5507		106.768		687.478		11.9565		279.13		14.6232
	89.3188		67.4348		194.725		49.1304		754.623		18.1449
	37.1739		40.5217		1198		18.3188		604.348		76.1739
	48.1594		39.2464		552.493		20		412.464		33.1594
	39.087		63.6957		-30.6957		8.71014		971.217		55.1014
	128.435		64.5797		699.029		25.6377		499.087		59.3478
	34.6087		76.4348		1909.54		13.1014		366		28.6232
	22.2609		35.2464		3708.59		11.1159		319.884		26.5797
	27.942		65.1304		1179.52		26.3188		6.92754		41.3043
	16.8406		94.3623		1100.01		30.0435		478.377		33.3478
	13.8551		60.3623		1971.86		7.49275		174.145		20.087
	43.7101		41.2464		3531.51		38.4638		244.304		60.1739
	12.6522		197.406		744.623		11.942		391.087		18.8696
	26.7246		107.159		1747.84		42.1014		881.565		119.551
	22.3913		87.7246		1012.77		9.97101		157.145		8.63768
	20.7826		41.8986		1513.8		5.65217		244.812		51.5797
	58.5942		52.7536		1225.84		5.3913		202.029		21.2754
	43.8696		68.4638		805.71		18.2174		842.855		31.1449
	32.0725		55.2319		926.174		18.6667		604.377		9.10145
	41.087		46.3478		1140.55		11.2899		695.464		48.4638
	19.6957		54.7101		1221.71		0.710145		685.841		30.7101
	64.6812		63.3623		1090.7		1.31884		759.29		45.8116
	39.6087		33.7246		1490.23		5.94203		599.739		36.3188
	14.3043		54.2029		1208.1		12.3043		413.232		59.087
	35.6377		41.3768		1313.46		8.5942		212.71		13.1739
	12.6812		102.058		579.696		8.89855		640.971		56.1739
	29.8261		74.2174		1306.49		12.7536		275.043		52.5797
	57.1594		73.4783		1334		5.63768		966.072		36.3768
	39.7246		66.7536		1075.29		5		301.797		33.2609
	26.6232		48.4783		1068.87		2.94203		727.725		11.7971
	28.087		121.884		1791.84		6.26087		404.377		16.3333
	16.8841		110.725		1314.88		7.44928		2.50725		54.2464
	10.3913		96.5942		1061.49		3.5942		492.391		26.6957
	40.7681		73.2464		3462.43		8.53623		692.043		22.4058
	69.4058		42.5652		5382.77		2.69565		76.3478		16.4928
	51.5507		44.1304		1230.78		2.78261		513.029		11.8551
	32.8841		76.3768		789.609		5.42029		334.116		21.4348
	50.3623		68.4348		1463.23		2.57971		237.377		10.7971
	118.638		62.6812		842.304		7.97101		146.899		50.3478
	74.6812		98.0725		2722.45		1.98551		357.565		49.5942
	37.9565		80.9565		1777.26		2.5942		942.768		45.4928
	25.087		46.7971		5469.45		-0.130435		5.57971		88.6957
	61.4203		80.2609		4512.35		1.98551		607.13		83.2174
	26.8116		60.2029		1608.57		8.15942		547.232		26.4638
	36.3768		128.87		1254.68		2.78261		303.551		50.9275
	43.4928		52.7681		968.58		6.05797		536.507		37.942
	72.8116		47.6232		1670.07		-2.34783		441.696		50.029
	58.942		66.1449		2317.99		-1.73913		445.29		56.971
	82.5797		60.1304		955.058		-1.23188		521.652		59.1594
	38.9275		94.7971		1591.9		-0.536232		510.754		25.7681
	71.4638		95.1739		2128.96		1.4058		417.101		100.145
	37.2609		51.8986		969.13		-0.333333		157.841		45.2029
	29.5507		68.9275		1752.54		2.23188		176.87		31.1594
	115.971		92.2029		2274.12		1.5942		352.565		33.6957
	27.2754		96.5072		1045.97		-3.18841		180.435		21.4203
	91.5942		69.9275		1383.39		0.550725		216.217		55.2029
	45.7681		64.8696		2827.1		-2.66667		102.913		30.7826
	90.942		70.6087		1248.65		-0.869565		553.159		27.8841
	31.7536		63.6667		3271.75		-2.78261		411.464		37.1594
	58.6087		72.1739		2690.81		-7.91304		373.739		23.8841
	50.1594		46.913		2018.16		47.8261		559.058		38.4638
	28.2464		58.3768		1519		30.6377		283.319		31.5797
	66.2319		50.3913		1310.81		99.6957		564.072		78.7246
	27.4638		71.4058		2442.13		64.087		548.014		47.3913
	40.2464		81.7971		4853.84		64.8841		783.449		29.8696
	31.1159		32.5652		1483.72		67.4058		481.507		70.5217
	45.029		71.9565		2670.51		35.2609		273.319		31.7391
	82.7246		57.4203		1410.59		49.6232		68.8986		59.6087
	86.1304		58		1859.13		43.8841		520.101		38.4783
	54.087		15.6522		1679.16		125.609		68.6087		25.3188
	115.594		31.6522		1899.99		24.1594		468.116		34.6087
	39.4203		43.3913		1796.57		71.4638		856.768		41.1594
	30.1014		59.058		1143.55		75.3043		137.087		32.6377
	48.5362		21.5652		1107.81		77.971		484.232		27.7971
	42.7826		48.6377		1203.45		35.4203		226.783		35.971
	31.7536		59.0435		2221.35		64.7971		251.116		71.4783
	66.3043		47.2899		1450.65		70.4203		173.957		34.9855
	94.4783		69.6377		1305.39		61.3333		635.174		24.2899
	45.6522		43.5507		1865.01		33.058		273.319		63.3333
	98.4928		89.8551		789.043		64.1159		170.609		21.7536
	46.9855		39.058		-33.942		45.9855		384.087		45.6377
	36.1014		41.3333		767.884		39.5507		632.913		36.058
	16.087		282.087		1273.7		66.3478		205.812		37.8116
	17		-2.08696		1923.94		246.884		477.275		19.2174
	20.6087		40.6232		1959.42		78.0435		365.971		22.6232
	51.3043		45.1884		2763.28		77.7101		193.928		19.3188
	29.2174		38.7101		2210.65		48.9275		401.319		49.3043
	25.3333		117.159		1083.03		114.072		80.5797		21.4348
	76.1739		66.6667		1893.1		46.2609		657.826		25.5652
	108.391		42.1594		2149.36		28.5217		6.26087		53.6377
	97.8841		46.5942		2149.41		25.5942		491.203		14.5797
	30.1014		29.1014		5773.61		19.3478		167.319		54.087
	24.9855		66.8116		3081.41		5.63768		411.638		16.3043
	55.3043		91.913		1688.13		32.4638		136.565		52.3333
	-11.1449		174.333		2113.59		64.4638		228.696		24.8841
	45.2899		52.942		1540.86		27.2174		7.44928		53.1884
	45.3188		82.6232		1148.32		51.7391		169.275		33.6812
	22.7391		78.8696		2617.61		87.8696		702.188		26.8261
	71.913		73.2754		893.029		33.087		359.058		43.3043
	74.6812		65.3333		1708.3		71.7101		821.667		16.3043
	65.3913		59.9565		2282.32		24.3768		43.2029		18.2899
	93.9275		54.3333		1940.97		42.3913		181.29		15.4058
	63.8986		84.0725		1811.68		24.8116		227.435		27.8261
	55.9275		69.913		1569.09		22.5942		509.986		11.7101
	38.8986		101.275		1558.54		90.5362		342.536		53.5652
	34.0725		53.5362		2213.29		19.6667		235.71		16.8696
	26.8406		45.1159		970.826		25.1594		367.725		19.8696
	83.7246		36.3188		1578.71		38.4783		79.5217		29.6377
	68.7971		303.899		1776.52		118.275		129.391		26.8696
	24.5072		84.4348		2012.03		27.2029		606.29		105.971
	29.913		72.1739		2002.29		39.6232		508.058		27.9565
	58.9275		39.7536		2272.99		38.9275		264.043		45.3043
	66.2754		63.1449		1804.14		42.8406		150.58		43.2464
	14.5507		40.2899		2066.17		38.5942		126.58		40.4203
	83.6812		75.1739		1143.28		26.8841		227.319		62.1304
	66.9565		67.3478		2028.64		34.7246		393.348		24.6232
	140.826		23.1884		1212.26		79.3913		777.406		44.0435
	28.5362		44.7681		1311.52		65.4493		809.159		33.3478
	74.4638		92.6812		2003.04		37.0145		322.826		26.2899
	58.8406		58.2319		1677.39		28.7826		75.4638		38.2899
	142.855		75.6957		2138.74		29.6812		472.101		43.029
	92.7826		90.6232		2509.59		33.0725		338.928		30.3913
	47.8551		50.5217		1325.13		46.9275		230.058		64.6087
	72.5797		73.913		1525.36		99.1014		303.826		36.5072
	98.913		38.1884		1535.04		32.8261		810.072		26.7681
	44.3913		51.1159		1563.78		60.2464		645.652		33.7101
	48.0725		62.8261		1869.74		21.7681		357.203		18.4493
	39.4203		90.5942		2415.14		59.5217		491.014		49.3478
	123.188		52.2464		1537.8		22.4348		870.971		41.2899
	36.4058		41.0145		1290.67		21.3913		528.594		30.8406
	87.3478		52.4783		2110.51		52.4928		559.246		20.3043
	42.4783		197.536		1686.51		23.7681		674.42		15.058
	102.725		77.058		1338.35				27.6522		34.087
	166.058		53.5217		1364.99				568.362		46.058
	42.3188		46.1884		2050.01				212.71		42.5217
	78.7246		52.8841		1905.54				186.362		61.0725
	108.116		90.3333		2080.62				599.971		34.5652
	54.1159		106.638		2364.49				827.841		28.8551
	43.6667		97.3043		4447.55				664.899		42.7681
	118.899		81.4928		1860.28				290.913		61.1884
	42.3623		125		-15.5362				178.855		27.4783
	33.7246		74.2174		2096.25				404.174		32.7681
	67.971		82.6087		1406.91				508.696		85.4058
	48.942		58.4058		1036.17				396.232		32.7391
	74.2754		43.1594		2539.45				610.275		57.0725
	76.971		66.1014		1356.93				117.551		28.1884
	130.188		58.3333		1853.19				95.3188		26.3333
	57.9565		135.971		1946.42				758.42		44.2174
	52.6232		49.7246		1560.96				747.42		28.0725
	46.4203		49.5942		1325.13				230.667		85.8841
	52.3623		30.7246		2553.65				421.072		12.6377
	94.7681		69.9275		1909.13				723.536		39.1159
	152.681		87.3333		1954.78				488.652		33.1014
	55.4638		89.971		5737.32				614.435		21.6667
	67.971		30.5942		2417.04				165.261		28.5652
	66.1159		51.6812		1425.72				524.783		25.971
	31.9565		17.5797		1623.8				203.029		72.9855
	25.3333		30.2754		1262.81				230.971		42.9565
	24.0145		70.8116		1727.54				83.8261		56.6232
	4		39.4783		1186.13				628.13		55.7246
	41.8406		19.4493		3077.48				72.4783		30.6232
	41.3623		43.2899		2073.36				192.58		8.78261
	57.2464		33.2464		4876.9				201.913		14.7536
	22.4493		58.4493		1712.87				603.304		37.3623
	38.913		28.8261		2999				18.6957		49.3478
	29.2464		38.9855		3055.48				251.333		55.2319
	32.1884		61.8406		2697.36				486.101		54.7246
	15.4203		75.6957		3300.42				711.449		26.5942
	71.4348		46.7101		1777.3				34.5362		32.9855
	33.5797		123.855		1193.06				60.3913		22.4783
	31.2174		82.1739		1213.49				35.8116		39.1449
	28.7971		41.4638		951.043				50.9565		17.971
	19.4348		55.0725		1210.93				53.4928		37.029
	30.8116		66.087		1359.51				84.1449		91.1014
	40.2174		48.1449		1914.51				-1.52174		31.5072
	38.8841		45.3913		2261				289.913		46.9565
	22.7101		57.7681		1538.81				182.928		28.1304
	29.8841		34.5507		1588.25				78.1304		26.1304
	48.3623		77.971		1785.32				57.913		37.8406
	32.4493		286.754		1979.04				59.4783		78.6522
	14.0725		55.1884		2474.55				150.014		47.8406
	40.6812		45.058		1632.33				551.232		23.2464
	82.2754		65.8841		1442.78				84.1449		23.942
	40.029		40.942		-8.44928				169.855		14.971
	40.4493		79.4203		1715.04				38.971		18.5507
	32.8696		41.3623		3022.9				414.13		26.2899
	48.3913		65.8261		1431.16				152.681		36.5942
	74.971		50.5217		1841.51				41.6522		23.2899
	64.1014		47.9275		2319.62				154.449		18.3768
	18.3333		97.1159		1887.19				90.3768		34.971
	47.7826		61.1884		3188				17.9565		11.9275
	52.8551		52.4058		2329.81				83.3333		2.52174
	48.4203		50.9855		2333.43				341.072		21.6522
	84.3333		62.4203		3095.1				177.522		44.6377
	53.4348		40.8261		1837.57				235.13		106.652
	49.2029		61.8406		3511.91				312.449		29.0725
	47.058		60.058		2328.09				41.1159		14.2319
	39.8841		103.232		1923.55				174.797
	59.2319		70.8116		2422.88				68.1594
	33.029		27.029		2069.58				133.449
	62.0145		57.029		2191.83				108.348
	28.029		53.5217		3546.45				285.014
	25.4203		85.5217		2391.74				241.87
	81.1014		46.8551		2132.12				186.203
	77.0145		71.913		1509.28				285.333
	40.8841		60.8841		1319.74				274.13
	68.3913		47.8261		2115.39				73.9275
	92.7536		88.2319		2626.86				345.754
	79.1594		57.971		2228.93				167.014
	64.4783		53.3043		3483.61				70.8696
	38.5942		55.6522		1610.26				27.5942
	102.072		104.478		3596.83				158.058
	8.21739		88.9275		2621.99				9.07246
	92.1739		307.188		3336.13				15.7536
	35.9275		101.957		2033.87				282.478
	41.1159		58.1449		2656.26				234.667
	40.8116		75.058		4015.83				64.5797
	51.9855		68.0145		2265.25				186.536
	78.4493		72.3188		1529.61				188.725
	59.8116		102.754		3648.57				32.3333
	30.029		66.5797		2662.94				20.1159
	58.4783		56.0725		2116.17
	59.9565		52.913		2587.46
	81.8551		86.2754		2172.13
	66.6667		95.3478		1798.59
	38.5072		57.3478		2351.62
	46.8986		66.971		1978.83
	47.0435		90.7391		2239.48
	35.1449		282.13		2626.78
	43.6087		124.652		2216.52
	45.3913		30.5507		2080.54
	77.3333		75.4493		3491.01
	37.1739		310.362		2491.48
	48.5652		65.3913		1780.74
	82.1304		64.7391		2063.54
	75.7826		68.1449		1799.75
	37.7536		86.8696		2428
	58.0145		75.971		2526.9
	33.1449		51.2174		2808.88
	83.913		65.058		3609.91
	52.6522		71.6667		3299.1
	76.4058		68.8986		2853.17
	38.2609		85.7391		4251.19
	37.3188		44.5797		2062.77
	56.0435		78.6522		1337.29
	19.029		69.8116		2998.71
	24.7391		59.3043		2555.84
	57.3333		52.5652		2987.17
	64.058		47.1739		3111.81
	40.6667		44.8551		-10.8406
	47.9565		32.8696		1871.96
	37.2609		88.7246		2139.46
	45.7246		41.9855		3523.8
	59.2899		57.2609		2928.38
	60.6522		40.0435		2122.88
	107.928		50.2899		1933.23
	35.2174		32.6232		3409.58
	45.0145		81.7826		3260.49
	89.6232		92.1594		2943.96
	83.6522		78.3768		3225.96
	50.5072		78.2609		1508.83
	93.3333		42.5652		1525.86
	31.1884		43.6522		2225.36
	45.8261		60.2174		2896.84
	53.6087		69.087		2019.84
	106.464		127.435		3008.7
	75.7681		48.5797		3219.96
	70.7391		239.681		3808.26
	115.246		63.9275		2878.72
	146.348		51.4638		2043.97
	123.348		74.8696		2347.41
	72.7391		94.2609		2822.91
	85.5797		68.6522		1483.84
	87.8986		41.3333		3468.99
	41.7536		70.1884		1799.14
	55.1159		73.7681		2373.16
	111.754		63.7101		876.971
	44.8986		84.8116		1172.35
	83.2174		44.1159		340.464
	58.058		31.8986		892.565
	73.971		114.609		843.536
	113.464		118.841		918.87
	70.5942		133.942		714.768
	38.058		36.942		914.101
	123.493		81.087		1517.19
	34.4058		61.6087		968.493
	41.029		85.6232		1105.06
	38.0145		53.5072		626.377
	45.9565		35.1739		815.159
	58.4493		85.7681		4179.8
	75.4203		89.8696		359.783
	53.029		59.7826		1248.78
	48.942		120.232		874.319
	46.5072		138.333		894.029
	48.3768		62.8551		1381.74
	58.8116		82.7101		1186.28
	44.9565		73.7681		1594.33
	41.9275		129.841		1489.77
	167.754		125.928		1021.41
	140.319		59.3188		428.913
	174.725		62.8261		1591.93
	128.652		83.7971		943.29
	146.957		92.7536		1186.16
	30.1449		68.8406		584.87
	144.841		50.1884		691.696
	53.5942		73.971		1086.99
	91.087		73.6522		1310.49
	54.7971		183.043		2146.19
	48.3623		57.8116		1262.25
	76.4638		41.2174		6
	39.2464		45.3188		1335.29
	116.174		65.6667		1062.72
	113.362				1278.36
	48.9855				1015.03
	67.3188				1000.46
	63				1202.3
	44.7391				2232.83
	38.3333				1281.64
	50.2029				4402.78
	142.377				704.913
	83.5217				903.391
	59.5507				915.174
	127.913				1327.9
	42				904.101
	22.3913				1622.16
	34.8261				759.261
	78.7681				957.667
	49.4058				1554.74
	72.6377				1449.46
	93.6087				1415.7
	140.826				1690.87
	34.3768				1901.93
	41.8406				1737.87
	32.5797				1949.97
	128.188				1402.87
	17.8406				1396.58
	34.0145				1454.45
	65.1594				1705.99
	48.4058				3277.87
	57.5362				5024.75
	67.1304				990.275		67.3188
	36.7391				3152.52		52.1884
	33.942				2756.23		52.913
	38.9565				1598.59		90.4203
	27.7536				2022.97		89.1159
	45.4203				2382.35		57.8406
	36.2464				1601.19		85.5942
	43.3188				1142.06		38.4058
	34.4203				1603.7		44.2464
	27.4348				2751.93		53.6812
	55.6377				2021.57		68
	51.8551				3617.14		36.9275
	71.4928				1681.01		41.4203
	34.1159				1187.33		47.1449
	1.71014				2510.84		58.4783
	125.913				1760.22		43.0725
	75.2464				2695.46		37.9275
	40.3043				1257.3		20.7246
	28.4203				1192.41		40.3623
	48.058				1211.68		36.5652
	56.1449				1218.65		66.2029
	46.6377				2358.48		22.5362
	79.8841				2838.51		76.8116
	95.2754				771.116		49.8261
	54.1304				1109.41		33.5942
	49.0725				2431.74		63.6812
	49.8116				3686.59		59.8116
	44.9275				986.971		79.8841
	79.2899				803.667		65
	30.2029				1819.71		41.8116
	37.5507				1819.77		79.6957
	64.4058				1936.99		50.3478
	53.8116				1066.09		79.9275
	46.7536				1834.72		53.6522
	39.6377				2419.06		46.7681
	35.1449				5830.38		83.3913
	69.4058				1685.42		58.5072
	34.4058				1365.81		24.7826
	30.7681				1464.67		32.4348
	22.1884				1349.45		91.5072
					1553.72		60.5652
					1663.93		34.7101
					1162.28		0.0434783
					1255.97		62.0435
					-8.02899		107.188
					982.638		86.8841
					1733.09		54.2899
					2413.65		37.1304
					1290.3		47.913
					2023.01		96.6232
					1626.36		26.8551
					1826.19		88.9275
					1725		61.5652
					1366.09		75.4638
					2034.55		51.3333
					2005.16		43.3478
					2538.28		46.2174
					3614.22		64.7536
					1623.77		39.2754
					1868.35		23.7246
					1144.33		70.0435
					1503.97		29.2609
					1409.41		37.1449
					1525.45		68.6377
					2294.14		46.5797
					1724.99		45.7101
					1265.03		56.3623
					3351.78		59.4493
					2063.3		53.8551
					2423.62		49.6667
					3137.99		79.5942
					1586.7		87.8261
					2299.67		63.2464
					2770.3		29.7246
					1968.41		136.565
					2983.41		15.7391
					2023.43		69.7391
					3868.96		35.2029
					2493.06		24.3768
					1844.57		51.3623
					1439.23		34.7536
					2638.32		44.5072
					1966.09		38.5362
					5487.48		28.9275
					1723.68		58.5507
					2389.78		87.4493
					2102.2		42.3043
					1587.17		63.6957
					2272.35		54.942
					52.5072		34.1739
					3712.67		31.4203
					4421		88.5942
					3145.94		51.0725
					2306.06		77.8261
					3177.59		39.8406
					2596.88		66.4058
					1975.77		82.7681
					3586.7		64.4493
					2534.58		84.3623
					3095.78		103.261
					-44.5652		78.3333
					2569.9		30.087
					3752.33		29.3043
					2804.62		38.6667
					2779.23		19.2319
					2357.39		61.4203
					1969.39		57.4783
					2793.16		97.5652
					3300.17		69.6377
					2988.46		72.6957
					2421.67		51.6087
					2035.07		39.1739
					2288.61		113.42
					3141.29		73.7391
					1657.06		72.8406
					1397.58		104.333
					2965.84		54.1014
					3271.93		103.928
					-39.029		103.435
					2505.96		12.1159
					1869.25		25.4203
					2339.51		78.3188
					1651.25		86.6812
					2943.22		126.551
					3532.51		78.8696
					3385.59		46.7246
					2992.43		102.275
					2137.19		75.9275
					2103.1		52.5797
					2020.58		44.971
					2326.9		82.5797
					4291.91		77.4493
					1699.12		83.8261
					2658.22		23.2609
					-15.1159		53.5797
					2958.14		40.7971
					3325.22		35.0725
					2381.55		24.1884
					5153.64		28.1884
					3325.3		30.8116
					2450.35		29.0435
					2907.46		31.3913
					3386.48		40.4638
					56.6522		47.7536
					4616.78		36.058
					3239.28		10.6667
					2089.93		35.8551
					3564.41		27.4783
					2885.46		33.029
					3512.16		34.5652
					3151.41		30.5072
					2687.99		36.3913
					3363.51		16.7101
					2730.59		38.0725
					2335.68		64.7536
					3591.83		51.8696
					2524.49		56.8261
					3387.57		57.087
					3663.55		53.3913
					3236.75		62.971
					3544.32		48.087
					1862.81		41.2464
					2318.48		53.4058
					2427.04		42.0145
					3955.68		34.971
					2199.32		16.0725
					3793.58		37.3768
					3075.9		67.8986
					2595.2		79.971
					2903.07		45.5797
					2604.61		19.0145
					2441.04		47.6377
					3123.2		67.942
					2493.74		77.2029
					3474.51		50.1159
					3741.57		20.3478
					3106.52		60.2464
					2738.61		55.6522
					2610.96		51.5797
					2385.28		30.4203
					2615.75		28.8551
					2221.16		32.2174
					2322.65		34.3043
					1783.22		47.8551
					2092.28		72.7681
					2528.54		82.5652
					2834.35		46.6957
					2348.96		37.7826
					3067.25		35.8261
					2589.38		15.5507
					2733.14		61.8696
					1659.65		55.1594
					3381.78		31
					2302.43		67.8841
					68.3478		57.6377
					44.6377		71.0725
					89.5797		34.3188
					15.5507		45.2464
					33.8696		68.9565
					57.2754		67.5797
					34.8841		24.087
					28.8841		76.4348
					56.4928		38.7971
					17.2754		59.1739
					40.4928		61.4203
					163.13		69.3913
					141.42		35.7971
					125.855		109.493
					65.9855		56.0725
					2109.35		16.1884
					80.8841		42.942
					76.6812		52.9855
					134.304		47.2029
					102.261		30.971
					129.507		32.8116
					121.203		44.7101
					102.116		70.087
					131.783		44.4493
					113.826		85.3043
					170.217		59.0145
					92.7101		74.6667
					69.8986		101.42
					161.957		50.5217
					123.087		58.4638
					328.232		59.8696
					156.493		49.6957
					122.333		36.2754
					257.464		36.5362
					251.333		79.1594
					267.754		74.4783
					149.348		29.5072
					106.696		52.5362
					101.797		37.913
					114.377		49.7826
					108.29		94.2899
					94.6812		50.0725
					93.8986		57.8261
					128.594		114.072
					1171.88		43.7826
					716.029		71.4638
					2138.49		79.2464
					1451.61		51.8406
					1465.94		51.1449
					2511.88		66.1304
					1952.48		43.029
					2509.84		61.3478
					2199.52		36.5072
					2520.2		77.1594
					2336.48		63.8551
					3018.52		96.0145
					1636.23		93.5652
					2542.71		32.6812
					2405.72		110.319
					1910.68		79.4638
					2415.54		71.4928
					1581.75		88.8551
					3650.26		79.2609
					3552.14		62.3188
					1720.32		45.6667
					3545.71		65.2609
					2387.17		83.6957
					2821.97		52.4493
					2066.91		87.7246
					1641.78		72.5507
					3433.36		66.3623
					3130.1		126.174
					3576.35		37.3188
					2792.83		60.913
					3438.16		102.42
					2483.54		117.638
					3789.51		66.4348
					1510.62		47.8696
					31.6957		65.5507
					3610.09		41.9275
					4323.52		68.6957
					2479.8		66.087
					3061.93		60.7826
					3105.1		14.5362
					3758.01		122.87
					1844.49		88.7681
					2687.01		97.5072
					2198.59		50.971
					3002.45		137.507
					3144.9		97.1304
					2885.51		72.5797
					1854.57		61.4783
					3495.43		66.4203
					1926.72		82.8696
					2669.16		32.6667
					1035.09		73.2029
					1284		34.4348
					1592.55		93.7826
					1742.48		47.1594
					1393.74		63.8116
					1210.52		70.1304
					1120.61		51.3333
					3830.68		57.5362
					1621		55.8841
					2041.87		61.9275
					1906.81		87.8841
					1675.62		70.058
					1441.07		33.4203
					2128.77
					2243.67
					1718.72
					2865.3
					1501.16
					1182
					6.66667
					1173.52
					1232.58
					2537.39
					3919.71
					1336.33
					3848.94
					3002.2
					2388.67
					2396.67
					2500.58
					2367.59
					2599.87
					2617.01
					1929.84
					213.058
					3611.41
					2385.01
					2140.91
					1415.77
					3425.16
					2695.88
					2567.97
					3071.45
					1580.86
					2312.86
					2738.83
					3161.13
					2185.91
					2097.62
					1832.49
					2238.1
					1921.96
					3247.99
					3552.88
					2902.22
					2087.64
					4052.35
					1688.23
					3366.59
					2978.68
					2801.64
					1813.51
					3165.25
					2465.91
					1591.72
					1696.59
					1477.84
					3951.38
					2528.86
					1247.28
					1437.16
					1647.49
					2079.17
					1267.61
					996.565
					1374.38
					1675.19
					2998.64
					1607.26
					1376.61
					2015.74
					2738.33
					1208.39
					1665.1
					1646.41
					1870.3
					1175.61
					1732.33
					2654.39
					1701.65
					2614.16
					2788.26
					3431.87
					1263.88
					2140.14
					1557.77
					2357.61
					2679.19
					1890.48
					3372.58
					1630.1
					974.884
					1696.99
					2316.22
					2079.41
					2464.32
					3299.97
					2012.51
					1943.77
					3271.83
					2581.36
					1941.88
					2794.14
					2018.1
					1622.33
					2257.3
					2244.09
					1717.12
					1638.59
					2903.33
					1640.12
					2577.33
					2302.93
					2433.87
					2445.84
					2858.41
					2066.42
					2518.86
					2114.48
					4621.35
					3855.8
					2408.3
					4654.72
					2712.65
					2527.96
					2985.8
					1823.43
					2170.71
					3931.35
					2113.48
					2093.62
					2075.1
					3361.84
					3197.03
					2440.54
					87.5217
					2270.16
					3003.62
					3823.42
					1841.36
					2429.72
					2459.25
					1081.28
					2239.1
					4082.75
					1606.33
					2149.57
					3234.22
					2873.03
					3502.61
					2272.22
					2531.36
					888
					2295.52
					2911.62
					1752.65
					2806.72
					4509.48
					2101.14
					2269.45
					3262.06
					1186.12
					4132.64
					3055.32
					2477.57
					1646
					2154.17
					3500.09
					3377.23
					2174
					2282.32
					1880.1
					2750.09
					2878.3
					2928.88
					2173.23
					3233.39
					3229.9
					3118.32
					3871.09
					2594.87
					1530.84
					1573.48
					2621.54
					2733.13
					3586.09
					2898.07
					5629.16
					1966.17
					3556.36
					2692.83
					2420.68
					2745.49
					2764.28
					2775.42
					2909.46
					3182.57
					2125.25
					3131.23
					1411.01
