# Supplementary material for: An analog to digital converter controls bistable transfer competence development of a widespread bacterial integrative and conjugative element
Source: eLife. 2020 Jul 28;9:e57915. doi: 10.7554/eLife.57915 (PMC7423338; doi:10.7554/eLife.57915)
Supplement: Figure 6—source data 1. [file elife-57915-fig6-data1.xlsx]

## Sheet: Simulations
Figure 4B	1		2		3				4	Figure 4C	mean BisR=8		BisR bimodal		BisDC out		BisDC out		BisDC out	Figure 4E		Figure 4C	BisR		BisR		BisR		BisR	Figure 4E	no feedback, unstable protein		Figure 4D	cascade														Figure 4E
Self loop only		Self loop only		Self loop only		Self loop only		Self loop only		self loop with B		self loop with b		self loop with B		self loop with B		self loop with B		self loop with B and late		input binom 16,0.5		input binom 50,0.5		input, binom 10,0.5		input binom 4,0.5		no loop, with B and late					TciR input					BisDC		BisDC		BisR		BisR		cascade output
DC=binom 16,0.5, c1=1		DC=binom 16,0.5 c1=5		DC=binom 16,0.5 c2=5		DC=binom 16,0.5 c4=0.25		DC=binom 16,0.5, c4=0.3		B=binom 16,0.5		b=discrete bimodal input		B=binom 50,0.5		B=binom 10, 0.5		B=binom 4,0.5		B=binom 16,0.5										B=binom 16,0.5					mean TciR = 4					for mean TciR =4		for mean TciR = 8		for mean TciR = 8		for mean TciR = 4
wave0	wave0_Hist	wave1	wave1_Hist	wave2	wave2_Hist	wave3	wave3_Hist	wave4	wave4_Hist	wave5	wave5_Hist	wave6	wave6_Hist	wave7	wave7_Hist	wave8	wave8_Hist	wave9	wave9_Hist	wave10	wave10_Hist	wave11	wave11_Hist	wave12	wave12_Hist	wave13	wave13_Hist	wave14	wave14_Hist	wave15	wave15_Hist		'BisR@30'	wave0_Hist	'TciR@1'	wave1_Hist	'BisR@30_Hist'	'BisR@10'	'BisR@10_Hist'	'BisDC@end'	'BisDC@end_Hist'	BisDC_end_16_05	BisDC_end_16_05_Hist	BisR_t10_16_05	BisR_t10_16_05_Hist	'BisR_t10-20_8_05'	'BisR_t10-20_8_05_Hist'	r_out_end_TciR8_05	r_out_end_TciR8_05_Hist
4	0.2138	6	0.0271	0	0.8986	6	0.7685	0	0.932	3	0.3615	0	0.7403	0	0.2205	5	0.631	0	0.9894	2	0.2132	11	0.0001	19	0	7	0.0012	2	0.0608	0	0.9918		0	0.5299	2	0.0042	0.6201	0	0.7662	0	0.6286	5	0.0901	0	0.400609	0	0.71133	0	0.06261
5	0.0275	7	0.0152	0	0.0182	0	0.0312	0	0.0136	4	0.0271	0	0.0086	7	0.0276	0	0.0147	0	0.0002	6	0.0272	5	0.0001	27	0	4	0.0103	3	0.2554	0	0.0069		0	0.4506	6	0.0308	0.0002	6	0	0	0.0136	3	0.0347	0	0	0	0	82	0.00023
5	0.0511	0	0.0486	0	0.0124	0	0.0369	0	0.0134	11	0.0378	0	0.0163	1	0.0507	9	0.0224	0	0.001	8	0.0603	6	0.0014	28	0	4	0.0441	3	0.3715	0	0.0013		0	0.0195	2	0.1155	0.0018	0	0	0	0.0287	5	0.0621	16	7.27273e-05	0	2e-05	0	0.00015
0	0.0844	6	0.0943	0	0.015	0	0.047	0	0.0157	6	0.0651	7	0.0252	5	0.0864	5	0.0367	0	0.0013	5	0.0875	12	0.011	25	0	5	0.1198	1	0.2429	0	0		0	0	3	0.2132	0.0134	0	0	0	0.0417	3	0.1026	0	0.0008	0	0.00066	52	0.00012
9	0.117	6	0.1391	7	0.0131	0	0.0401	0	0.0115	1	0.093	0	0.0338	2	0.1133	0	0.051	0	0.0015	8	0.1159	8	0.0283	24	0	9	0.2019	3		0	0		0	0	7	0.2733	0.0341	0	0	0	0.0521	0	0.1399	10	0.0107455	0	0.00682	0	0.00011
9	0.1249	6	0.1617	0	0.0133	0	0.0331	0	0.0073	4	0.106	8	0.0443	6	0.1252	0	0.0599	0	0.0014	4	0.1286	9	0.0654	24	0	4	0.2483	0		0	0		0	0	6	0.216	0.0606	0	0.0208	0	0.0618	4	0.1448	0	0.0752091	0	0.04035	0	0.00045
9	0.1228	7	0.1474	0	0.0098	4	0.0223	0	0.0036	7	0.0988	0	0.0393	9	0.1176	0	0.0571	0	0.002	3	0.1201	6	0.1193	22	0	5	0.1957	1		0	0		0	0	5	0.1111	0.0531	0	0.102	2	0.0529	6	0.1425	0	0.271564	6	0.12386	0	0.00272
6	0.0984	7	0.1298	0	0.0072	4	0.0116	0	0.0021	2	0.0796	0	0.0328	4	0.0967	0	0.0453	0	0.0011	10	0.0921	8	0.1759	24	0	4	0.1164	2		0	0		5	0	6	0.0315	0.0021	0	0	0	0.0474	6	0.1085	10	3.63636e-05	0	0.0001	113	0.00847
2	0.0682	8	0.0984	0	0.0052	0	0.0055	0	0.0005	0	0.0527	7	0.0263	8	0.0685	0	0.0345	0	0.0012	6	0.0651	8	0.1954	25	0	5	0.0488	0		0	0		0	0	5		0.0072	10	0	0	0.031	4	0.0738	0	0.000990909	0	0.00071	82	0.01314
5	0.042	7	0.0643	0	0.004	0	0.0022	0	0.0002	4	0.0359	8	0.0153	0	0.0435	0	0.0231	0	0.0003	7	0.0446	8	0.1722	19	0	4	0.012	4		0	0		0	0	5		0.0125	0	0.0003	0	0.0209	0	0.047	0	0.00806364	0	0.00499	89	0.00874
5	0.0261	6	0.0379	0	0.0012	0	0.0013	0	0	3	0.0212	0	0.0085	5	0.0252	7	0.0128	0	0.0003	5	0.0235	6	0.1213	26	0	3		3		0	0		0	0	3		0.0145	0	0.0886	0	0.0106	0	0.027	0	0.109064	0	0.05195	0	0.00287
0	0.0127	5	0.0191	2	0.0011	0	0.0002	0	0.0001	0	0.0111	0	0.0041	7	0.0138	0	0.0061	0	0.0003	4	0.0117	7	0.0668	23	0	4		3		0	0		0	0	4		0.0034	0	0	3	0.0071	7	0.0151	0	1.81818e-05	0	0	76	0.00037
6	0.0058	6	0.0095	0	0.0004	0	0	0	0	7	0.0061	0	0.0031	0	0.0061	0	0.0031	0	0	7	0.0053	8	0.0317	30	0	7		0		0	0		0	0	4		0.0094	0	0	0	0.0017	2	0.0074	6	0.000181818	6	9e-05	0	2e-05
5	0.0029	6	0.0046	0	0.0003	0	0	0	0	0	0.003	8	0.0017	7	0.0029	0	0.0013	0	0	0	0.0028	9	0.0094	26	0.0004	4		1		0	0		5	0	7		0.0197	0	0	0	0.0009	0	0.0032	6	0.0016	0	0.0009	0	0
6	0.0014	0	0.0015	0	0.0001	0	0.0001	0	0	1	0.0007	0	0.0001	9	0.0013	7	0.0005	0	0	6	0.0009	8	0.0014	22	0.0007	5		4		0	0		0	0	2		0.0261	0	0	6	0.0007	0	0.0008	0	0.00905455	10	0.00439	0	0
5	0.0006	5	0.0009	0	0.0001	0	0	1	0	0	0.0004	5	0.0002	5	0.0004	0	0.0004	0	0	0	0.0007	5	0.0003	22	0.0013	4		1		0	0		15	0	5		0.0283	0	0	0	0.0001	5	0.0005	10	0.0310909	10	0.01513	0	0
7		9		0		0		0		7		0		0		0		0		3		11		26	0.0026	5		4		0			13	0	3		0.0195	0	0.022	9	0.0002	2	0	10	0.0570182	0	0.02682	85
6		6		0		2		0		6		0		0		0		0		0		7		23	0.007	4		2		0			0	0	3		0.0021	6	0	0	0	4	0	0	5.45454e-05	0	5e-05	0
3		7		0		0		0		7		0		3		10		0		3		9		23	0.0155	6		1		0			0	0	2		0.0034	0	0	0	0	6	0	6	0.000745455	0	0.00019	85
4		7		0		0		0		0		0		6		3		0		6		8		22	0.0288	4		2		0			0	0	6		0.0049	0	0	0	0	0	0	0	0.00231818	0	0.00128	0
5		7		0		0		0		3		0		5		0		0		1		8		30	0.0426	6		1		0			0	0	2		0.0026	0	0.0001	0	0	0	0	10	0.00527273	0	0.00283	0
0		11		0		0		0		5		1		5		0		0		6		5		23	0.0631	5		0		0			0	0	4		0.0026	0	0	4	0	9	0	10	0	5	0	93
6		6		0		0		0		0		0		10		0		0		9		10		21	0.0798	5		1		0			13	0	3		0.0057	10	0	3	0	5	0	5	5.45454e-05	0	0	101
0		5		0		0		0		0		7		9		0		0		4		7		30	0.0964	3		0		0			6	0	2		0.0114	6	0	0	0	10	0	0	0.000463636	0	0.00023	0
5		6		0		0		0		0		0		4		0		0		6		9		22	0.1051	7		3		0			6	0	4		0.01	0	0	0	0	9	0	0	0.00189091	10	0.00103	81
8		8		0		0		2		0		0		5		0		0		0		8		31	0.1133	5		3		0			24		4			0		7		7		10		0		0
0		8		4		2		0		7		0		5		4		0		5		12		23	0.1047	5		4		0			0		3			0		10		6		6		0		89
9		4		0		0		0		6		0		0		2		0		2		11		28	0.0996	7		1		0			0		3			10		0		6		10		0		0
6		6		0		1		0		0		0		4		0		0		2		8		28	0.0743	5		2		0			0		3			0		0		5		0		0		0
6		7		0		6		0		6		0		3		0		0		2		5		28	0.0617	7		3		0			0		6			0		5		8		6		0		0
5		4		0		0		0		7		0		0		0		0		6		7		22	0.0427	4		2		0			15		3			0		0		7		0		0		0
7		9		0		0		0		0		1		4		0		0		5		10		19	0.0269	5		0		0			0		4			0		0		3		10		0		0
0		2		0		0		0		1		0		6		7		0		7		8		27	0.0163	2		2		0			0		2			0		6		4		10		16		0
4		3		0		0		2		8		3		3		7		0		7		9		24	0.0088	8		3		0			20		5			6		0		0		16		0		0
0		7		0		5		0		11		0		6		0		0		5		1		24	0.005	5		3		0			6		4			0		0		7		0		6		0
4		5		0		3		2		2		0		0		0		0		7		9		32	0.0021	5		1		0			14		6			0		0		1		10		0		89
0		10		0		0		0		7		0		7		0		0		5		9		25	0.0009	4		2		0			0		5			0		7		3		0		0		0
0		8		0		0		0		0		0		4		5		0		8		6		34	0.0003	4		2		0			9		5			0		2		4		0		0		0
6		4		0		0		0		6		0		3		8		0		0		7		24	0	6		2		0			0		0			6		0		7		6		0		0
4		5		0		4		0		6		0		3		3		0		2		8		22	0	7		0		0			6		5			6		10		6		0		0		81
5		5		0		0		0		6		0		0		0		0		7		9		23	0	8		3		0			0		5			0		6		12		0		0		83
3		7		0		0		0		3		0		4		11		0		6		10		22	0.0001	7		3		0			0		2			0		0		4		0		0		57
7		3		0		0		0		3		0		8		0		0		2		3		30	0	5		0		0			0		4			0		0		9		0		0		0
0		6		0		7		0		0		0		6		0		0		1		6		25	0	1		3		0			0		6			0		8		9		0		6		90
0		2		0		0		0		0		0		7		0		0		0		5		21	0	5		2		0			15		2			0		0		6		6		0		98
6		0		0		0		0		2		7		2		0		0		3		7		22	0	3		2		0			6		6			0		1		9		0		0		0
10		9		0		0		0		0		0		7		0		0		0		6		27	0	5		2		0			0		5			6		0		2		0		0		78
0		6		0		0		0		7		8		0		0		0		8		9		28	0	8		2		0			0		4			0		12		2		0		0		72
1		5		0		5		0		0		0		5		0		0		2		6		28	0	4		4		0			5		4			0		0		11		10		0		0
4		6		0		1		0		7		0		8		5		0		1		9		24	0	4		2		0			0		3			0		0		6		5		0		80
3		7		5		0		0		4		0		4		9		0		0		13		23		7		3		0			0		2			0		6		10		0		6		0
2		6		0		0		0		6		0		8		0		0		10		6		20		1		1		0			19		5			0		1		4		6		0		69
4		3		0		4		0		0		0		5		0		0		4		8		23		7		2		0			0		6			0		4		2		0		0		0
4		4		0		0		5		0		0		8		0		0		0		13		26		3		2		0			0		4			0		0		5		0		6		0
0		8		0		0		0		10		0		7		1		0		7		5		27		6		4		0			10		3			6		0		6		6		0		83
5		3		0		0		0		0		0		0		0		0		3		9		25		4		1		0			0		6			0		4		4		0		0		0
0		9		0		0		0		9		5		6		0		0		8		9		23		3		0		0			0		3			0		1		2		6		6		85
6		3		0		0		0		0		0		6		6		0		8		8		24		2		3		0			25		4			10		4		2		16		0		88
7		4		0		3		0		4		4		10		0		0		0		10		25		6		1		0			0		5			5		9		0		0		0		0
7		7		0		0		0		4		0		3		4		0		0		7		28		5		2		0			0		5			10		3		5		6		0		0
8		8		0		0		0		0		5		0		0		0		3		7		24		6		3		0			0		3			0		0		5		0		0		79
0		6		0		0		0		0		0		6		4		0		0		8		28		5		2		0			26		4			10		3		7		0		0		0
7		3		6		0		0		0		5		6		0		0		4		8		23		5		1		0			10		4			0		0		1		0		0		0
0		7		0		0		0		3		0		5		0		0		3		10		33		3		2		0			0		4			0		5		5		0		0		0
5		7		0		0		0		0		0		5		0		0		5		8		24		3		2		0			10		5			0		4		3		0		0		87
5		6		0		0		0		3		0		5		0		0		0		7		27		3		0		0			0		7			0		0		3		6		0		88
3		3		0		0		0		4		13		3		7		0		6		11		28		3		0		0			0		5			0		0		3		0		5		0
8		4		0		5		0		0		3		6		0		0		6		7		23		3		1		0			14		4			0		0		7		5		16		0
6		9		0		0		0		0		0		4		0		0		0		8		23		5		2		0			13		3			0		5		6		6		0		0
0		5		7		0		0		6		0		5		0		0		5		7		27		2		4		0			0		3			0		6		5		0		0		92
7		8		0		0		0		6		0		8		8		0		0		9		26		7		1		0			0		3			0		0		5		0		0		0
6		3		0		6		0		0		0		4		0		0		6		4		28		6		4		0			0		4			0		0		5		0		0		79
0		5		3		0		0		0		5		0		0		0		0		9		27		5		1		0			35		3			6		0		5		0		10		0
3		0		4		0		0		0		6		4		0		0		11		10		21		4		3		0			13		4			6		6		2		10		0		0
7		8		0		0		0		2		0		6		0		0		0		12		23		5		1		0			0		6			0		9		4		0		0		0
5		7		0		0		2		0		6		5		0		0		7		7		26		10		2		0			0		3			0		0		3		0		0		0
0		6		0		0		2		0		4		3		6		0		9		8		26		5		1		0			0		5			0		6		7		0		0		93
3		7		0		0		0		9		0		4		0		0		4		8		29		5		1		0			0		5			10		0		2		10		0		0
4		4		0		0		0		2		0		8		0		0		5		6		22		5		2		0			6		5			0		0		2		0		0		66
0		9		0		5		0		6		0		3		0		0		0		5		26		6		3		0			14		4			10		0		6		0		10		0
4		8		0		0		0		4		0		2		0		0		5		3		30		7		4		0			34		4			0		0		6		10		0		0
6		8		0		0		7		4		0		0		7		0		0		9		24		2		3		0			0		4			0		0		5		0		6		0
6		2		2		0		0		0		0		8		0		0		4		7		28		4		4		0			4		5			6		0		3		6		0		0
6		6		0		0		0		5		0		0		6		0		0		6		26		7		3		0			0		5			0		0		7		0		6		76
4		10		0		0		0		10		0		6		2		0		5		8		27		4		4		0			5		2			0		0		5		0		0		0
0		4		8		0		0		5		1		7		0		0		4		10		25		6		2		0			0		2			0		0		4		0		0		0
3		3		0		0		0		0		0		3		2		0		8		12		26		5		2		0			0		1			0		0		5		0		10		0
6		6		0		8		1		4		0		8		0		0		4		8		21		6		2		0			5		5			0		0		4		10		0		0
0		7		0		0		0		0		0		10		10		0		1		8		22		6		0		0			0		3			0		8		5		6		0		83
7		8		0		0		0		5		0		2		2		0		1		9		29		4		0		0			0		3			0		0		5		0		0		79
0		2		0		0		0		5		0		3		0		0		3		7		23		4		3		0			0		2			0		3		4		0		0		0
2		2		0		0		0		0		0		7		0		0		3		9		26		5		1		0			0		5			0		0		2		16		0		0
0		3		0		0		0		3		4		9		0		0		3		8		20		4		2		0			0		5			0		0		3		10		0		0
5		4		0		0		0		2		7		0		0		0		8		7		29		4		1		0			0		3			10		6		6		0		0		0
6		10		0		0		0		0		6		3		0		0		1		6		28		6		3		2			0		5			0		7		6		0		0		72
3		10		3		0		0		0		0		7		4		0		5		7		22		6		2		0			0		2			0		8		3		6		0		9
8		5		3		0		0		6		0		7		0		0		13		10		26		6		4		0			0		4			6		4		2		6		0		0
5		10		0		0		0		5		0		8		4		0		6		6		21		4		3		0			0		5			0		0		1		0		0		0
7		8		0		0		0		0		10		6		7		0		5		6		29		2		1		0			0		4			0		0		9		6		0		0
6		4		5		0		0		0		0		0		0		0		8		10		28		7		1		0			0		4			0		5		8		16		0		0
8		7		0		0		0		0		2		4		0		0		6		8		26		7		2		0			0		3			0		0		7		10		0		0
10		6		0		0		0		4		0		0		0		0		5		9		21		8		3		0			0		3			10		0		3		10		6		0
0		3		0		0		0		10		0		0		0		0		3		9		30		4		2		0			15		3			0		8		5		6		0		0
9		5		0		4		0		2		10		8		0		0		6		10		26		6		2		0			0		5			0		0		3		0		5		0
4		9		0		0		0		3		0		0		0		0		0		8		19		4		0		0			8		5			6		0		6		6		0		96
9		2		0		0		0		0		0		9		7		0		6		9		24		5		3		0			5		4			0		0		4		0		0		0
0		5		0		0		0		0		0		0		0		0		3		6		27		5		2		0			0		6			0		0		4		0		0		0
5		6		0		3		5		1		0		7		0		0		9		8		26		2		1		0			0		1			10		0		3		0		10		0
10		9		0		0		0		9		8		6		6		0		9		7		21		7		2		0			5		4			0		0		9		10		10		0
4		6		0		0		0		8		0		4		3		0		1		6		19		6		1		0			10		5			0		0		9		10		0		0
5		9		0		0		0		7		0		6		0		0		0		7		25		6		4		0			0		4			6		0		7		6		0		102
3		6		0		0		0		1		4		5		5		0		5		5		24		7		2		0			0		5			6		0		5		0		0		0
11		9		0		0		7		3		0		0		7		0		7		9		32		6		1		0			0		6			0		0		6		0		0		0
3		8		0		0		1		4		0		3		0		6		5		10		32		5		1		0			0		5			0		0		1		0		0		0
4		6		0		5		0		0		0		3		0		0		7		10		24		5		0		0			0		2			0		0		3		6		0		0
8		4		0		0		0		0		0		5		0		0		6		5		19		3		1		0			0		4			0		0		7		0		0		0
4		5		0		0		0		8		0		8		0		0		2		7		30		6		0		0			10		5			10		0		4		0		0		0
6		10		0		0		0		0		5		2		3		0		8		9		25		5		2		0			0		5			0		1		4		10		0		90
3		2		0		0		0		0		3		4		0		0		9		6		20		2		3		0			0		4			0		0		4		0		0		0
0		3		0		6		0		3		0		4		0		0		2		5		30		2		2		0			0		6			0		0		2		6		0		86
8		8		3		0		0		3		0		7		0		0		4		7		22		2		2		0			0		2			0		0		8		0		16		0
5		3		0		0		0		1		0		5		5		4		6		9		27		5		1		0			15		2			0		0		4		16		10		0
7		4		0		0		3		0		0		5		5		0		4		9		30		4		4		0			23		6			0		3		10		10		0		90
5		7		0		0		0		5		8		5		7		0		3		7		26		3		3		0			0		5			0		3		2		10		0		60
3		4		0		4		0		0		0		7		0		0		3		9		25		4		3		0			0		3			0		11		2		6		0		0
9		3		3		0		0		0		0		5		0		0		2		9		30		4		2		0			0		4			0		7		6		0		0		0
6		9		0		0		0		0		5		2		0		0		3		7		29		5		3		0			6		2			0		0		9		0		0		0
0		2		0		0		0		6		0		0		0		0		0		10		24		3		1		0			0		4			0		0		7		5		6		0
1		3		0		0		0		0		0		9		0		0		8		9		25		7		0		0			6		4			0		9		6		6		0		0
7		12		0		0		1		0		2		9		6		0		5		6		23		4		2		0			0		6			0		0		6		0		10		97
6		4		0		0		0		5		5		3		0		0		9		5		25		7		2		0			24		1			0		4		5		10		0		82
6		6		0		0		0		1		0		8		3		0		5		8		29		6		1		0			0		2			0		0		0		5		6		85
3		4		0		5		0		6		0		6		0		0		4		9		26		4		2		0			3		4			0		0		5		0		0		0
8		5		0		0		0		0		0		2		0		0		5		9		33		5		1		0			9		4			0		6		9		0		10		86
6		5		0		0		0		5		0		5		6		0		6		9		23		5		0		0			23		6			0		0		4		10		0		81
5		6		4		0		0		5		0		0		6		0		9		6		27		5		3		0			0		3			0		0		8		0		0		79
5		5		0		6		0		6		0		5		0		0		4		11		26		4		1		0			0		6			0		2		1		0		10		0
10		6		0		0		0		6		0		7		6		0		10		5		25		6		1		0			12		2			0		3		7		10		10		0
5		6		0		0		0		0		7		5		1		0		3		9		24		6		1		0			9		4			0		6		1		10		0		0
2		5		0		2		0		10		0		0		4		0		8		9		24		4		2		0			0		3			10		0		3		0		0		0
0		7		0		2		0		9		0		12		0		0		6		5		26		5		3		0			0		5			0		0		4		0		0		0
3		8		0		0		0		5		0		7		0		0		0		10		23		6		1		0			0		6			0		0		6		0		10		0
4		5		0		5		0		0		8		7		0		0		6		10		24		3		3		0			14		3			10		0		8		10		0		0
3		3		0		3		6		0		0		0		0		0		3		6		23		6		2		0			0		2			10		0		6		10		0		0
4		4		0		0		0		8		0		10		9		0		11		10		26		4		3		0			0		3			16		0		2		10		0		0
4		7		0		6		0		5		0		0		8		0		5		9		25		8		1		0			0		5			0		0		6		0		0		87
0		5		0		0		0		9		0		12		0		0		0		6		23		4		2		0			0		2			0		7		6		10		0		0
3		7		0		2		0		5		0		4		0		0		9		6		31		4		4		1			0		3			0		0		0		0		6		60
0		4		0		0		3		0		0		6		0		0		8		8		25		4		1		0			5		3			0		0		0		6		0		0
2		5		3		0		0		0		11		0		0		0		0		9		23		7		4		0			0		3			0		1		6		0		10		95
0		8		0		0		0		4		5		0		0		0		4		10		29		5		4		0			16		6			0		3		3		10		0		94
2		3		0		0		0		5		0		13		0		0		5		9		29		4		2		0			5		5			0		0		5		0		0		0
7		5		0		3		0		7		0		4		0		0		6		11		26		5		1		0			0		4			0		9		9		6		0		0
11		7		0		0		7		2		0		5		0		0		13		6		20		5		1		0			0		6			0		0		2		10		0		0
5		9		1		5		0		9		0		9		0		0		4		3		19		5		1		0			5		3			0		0		6		0		10		0
11		6		0		0		0		0		0		3		0		0		8		9		17		6		3		0			5		5			6		6		4		0		6		0
0		2		0		0		0		5		0		6		0		0		5		8		22		6		1		0			12		3			0		0		3		6		0		0
0		12		0		0		0		0		2		5		5		0		0		9		21		4		3		0			0		3			0		0		1		0		6		89
0		7		0		0		3		5		0		0		0		0		2		12		26		6		1		0			5		5			6		0		2		0		0		0
6		7		0		0		0		7		6		8		0		0		4		5		25		6		3		0			6		1			0		0		1		0		0		79
2		8		0		0		0		8		10		9		0		0		0		5		25		3		4		0			0		7			0		4		10		6		0		0
5		4		3		0		0		0		0		7		5		0		4		9		23		6		3		0			0		5			0		0		8		10		6		0
0		6		0		0		0		6		0		0		0		0		11		6		22		6		1		0			4		5			6		0		7		9		16		93
0		12		0		0		0		3		0		4		0		0		7		10		25		5		0		0			13		3			0		0		3		10		0		75
0		9		0		3		0		7		0		0		0		0		6		5		30		4		2		0			0		5			0		0		9		0		16		0
4		8		0		0		0		10		3		5		0		0		0		6		27		4		1		0			14		5			0		0		2		16		0		0
4		4		0		3		0		6		0		10		0		0		5		9		25		4		3		0			0		4			0		0		4		6		0		0
5		7		0		0		0		2		5		1		0		0		9		3		24		4		3		0			13		2			0		0		5		0		10		0
2		7		0		0		0		5		0		0		0		0		0		6		26		4		1		0			15		2			0		0		0		10		0		0
6		3		0		0		3		6		0		1		2		0		7		7		21		6		2		0			0		3			6		6		0		6		0		0
1		2		0		6		0		8		0		11		8		0		0		7		25		7		3		0			0		4			0		5		4		0		6		0
7		6		0		0		3		4		0		7		6		0		5		9		25		6		2		0			13		5			0		0		7		0		0		0
2		10		0		0		0		9		0		1		0		0		9		6		20		6		2		0			0		5			0		5		5		6		0		88
6		8		0		0		0		0		4		4		0		0		6		7		21		4		2		0			0		4			10		0		3		0		0		0
0		5		0		4		0		1		0		8		0		0		3		8		25		4		3		0			0		3			0		0		5		0		0		0
7		7		0		3		1		6		0		6		9		0		9		8		20		6		2		0			0		2			6		0		3		5		6		106
0		6		0		7		0		8		0		0		0		0		3		8		26		5		3		0			7		3			0		0		3		6		0		0
5		3		5		0		0		1		0		4		5		0		0		7		28		4		1		0			0		5			0		5		1		10		0		0
0		7		0		0		0		0		4		0		0		0		5		9		30		3		1		0			0		4			0		0		0		0		10		0
0		4		0		0		0		0		0		4		1		0		5		8		29		3		2		0			20		3			0		4		8		10		0		83
6		3		0		4		0		0		0		3		0		0		2		11		25		4		1		0			0		3			6		0		6		0		6		0
7		7		0		0		0		0		3		6		9		0		0		8		23		7		2		0			5		6			6		0		8		6		0		0
3		5		0		6		0		4		5		8		0		0		5		8		26		4		2		0			0		3			0		0		3		0		0		86
4		6		0		0		0		0		5		6		0		0		2		6		29		6		3		0			0		2			10		0		4		10		0		0
5		8		0		3		0		0		0		9		0		0		6		6		24		6		2		0			0		5			0		7		0		10		0		86
6		10		0		0		0		11		0		0		0		0		8		8		26		3		0		0			0		0			0		0		11		0		0		0
7		6		0		1		0		0		5		0		0		0		10		10		30		5		3		0			0		6			16		0		8		0		10		0
0		7		0		0		0		9		0		4		0		0		5		8		23		3		1		0			5		3			0		0		9		10		0		0
0		3		0		3		0		0		0		7		0		0		7		11		27		8		3		0			16		6			0		0		0		0		0		87
5		9		0		0		1		8		0		0		0		0		8		5		32		3		1		0			0		3			0		3		3		0		0		0
6		2		0		5		0		3		7		10		0		0		7		8		22		6		4		0			0		7			0		3		4		0		10		0
6		4		0		0		0		8		2		4		0		0		0		10		23		8		0		0			14		5			0		0		5		10		0		83
6		10		0		0		3		4		0		0		0		0		0		8		24		5		3		1			0		2			0		3		7		6		0		0
5		4		0		0		7		4		0		5		0		0		5		8		23		5		2		0			0		4			0		0		4		10		16		89
11		1		0		0		0		8		0		10		7		0		5		7		19		4		2		0			17		6			0		0		5		16		0		0
10		3		7		3		0		6		9		10		4		0		6		7		20		4		2		0			10		4			0		8		3		0		0		0
1		10		0		0		1		5		0		2		0		0		9		9		32		6		0		0			0		5			0		0		7		10		0		91
4		4		0		0		0		8		0		4		0		0		9		7		26		4		1		0			0		5			0		2		5		0		0		86
0		6		0		0		0		4		8		1		0		0		6		8		24		5		0		0			0		3			0		0		9		0		0		97
7		7		0		2		0		8		0		4		0		0		4		8		21		4		3		0			0		4			0		0		4		0		0		0
7		7		0		0		0		7		9		0		0		0		3		10		26		7		3		0			0		5			0		0		9		0		0		83
5		4		1		0		0		0		3		4		0		0		9		7		26		6		2		0			14		6			0		4		4		0		10		86
7		4		0		0		0		0		0		4		0		0		6		10		26		5		3		0			25		3			0		2		13		10		0		0
6		7		8		4		0		6		0		6		5		0		5		11		22		2		4		0			0		6			6		0		4		16		0		67
7		5		0		0		0		3		0		4		7		0		6		8		26		7		4		0			5		5			0		0		1		0		0		0
5		7		0		0		0		12		0		5		0		0		4		8		26		6		1		0			0		6			0		7		7		0		0		0
3		2		0		0		0		6		0		0		5		0		5		8		22		2		1		0			26		2			0		0		4		0		6		0
2		6		3		0		0		5		5		2		3		0		7		7		29		6		2		0			5		6			5		2		11		6		0		0
3		7		0		0		0		0		10		3		0		0		0		10		28		5		2		0			6		4			0		0		8		10		5		0
3		5		0		0		0		0		0		0		0		0		5		7		30		6		3		0			13		3			0		11		12		6		0		73
6		10		0		3		0		1		0		9		0		0		0		8		19		2		2		0			0		4			0		0		3		0		0		0
6		6		0		0		0		4		0		5		0		0		8		8		28		7		1		0			0		3			0		5		3		0		0		0
4		8		0		0		0		0		6		5		0		0		4		10		27		5		3		1			0		3			0		5		7		10		0		4
0		11		0		3		0		9		0		5		0		0		7		6		27		6		3		0			0		3			0		8		7		0		0		0
6		6		0		1		0		6		0		4		4		0		0		11		24		6		2		0			0		7			0		6		5		0		0		0
5		3		0		0		0		5		0		9		0		11		6		8		22		3		0		0			0		6			0		0		6		6		0		0
8		4		0		0		0		4		3		0		4		0		0		7		29		5		0		0			0		5			0		4		8		6		0		0
6		7		0		0		0		5		0		2		6		0		0		3		19		6		3		0			0		4			10		0		8		6		0		0
7		4		0		0		0		6		0		8		0		0		6		6		27		6		2		0			0		6			0		0		5		10		6		83
7		2		0		0		0		7		0		6		6		0		6		8		24		6		1		0			44		5			0		0		6		0		10		0
10		3		0		5		0		0		0		5		0		6		7		11		25		3		3		0			15		5			0		4		9		16		0		0
9		5		8		0		0		9		0		6		9		0		5		7		25		3		1		0			5		4			0		7		3		0		16		0
8		5		0		0		0		5		0		2		0		0		14		7		23		5		4		0			14		7			0		0		9		16		0		12
0		4		0		0		0		0		0		0		0		0		5		10		22		4		0		0			0		4			0		8		0		10		0		75
0		3		0		0		0		8		5		0		0		0		6		9		23		4		2		0			0		1			10		4		4		0		0		89
5		8		0		0		0		9		0		4		0		0		9		9		20		7		2		0			15		4			0		0		7		0		0		81
0		9		0		0		0		3		0		6		6		0		6		4		30		7		4		0			0		4			0		11		6		0		10		75
2		7		0		0		0		0		0		3		0		0		2		8		19		6		3		0			5		5			0		0		5		10		16		80
3		4		0		5		0		9		0		0		0		0		10		9		22		7		2		0			34		5			0		0		0		10		0		90
6		4		3		8		0		2		7		7		10		0		0		8		26		5		1		0			0		3			6		0		0		0		6		89
6		13		0		0		0		0		5		0		0		0		0		13		28		4		2		0			21		3			0		6		10		0		10		74
6		7		7		0		0		2		5		0		0		0		5		7		25		2		3		0			15		5			0		4		6		10		0		0
8		5		0		0		0		5		0		9		5		0		2		8		25		3		1		0			10		4			10		5		0		0		5		109
6		7		0		0		0		1		0		6		0		0		7		5		24		6		1		0			4		7			6		0		9		5		0		0
0		3		0		6		0		0		0		7		4		0		7		4		25		5		3		0			0		5			0		0		4		0		0		0
7		7		0		0		0		0		0		1		8		0		8		10		23		5		3		0			0		3			0		0		5		0		0		92
8		8		0		0		0		5		2		1		4		0		4		10		25		6		0		0			0		4			0		13		0		0		0		78
0		5		0		0		4		0		5		2		8		0		7		9		29		7		3		0			0		5			0		0		0		6		5		0
7		4		0		0		0		5		7		6		0		0		2		8		25		8		1		0			12		5			0		0		7		5		0		0
4		12		0		0		0		0		5		6		0		0		7		8		30		2		1		0			0		4			0		0		4		0		0		0
3		4		0		0		1		4		0		4		0		0		6		9		21		5		0		0			5		3			0		0		1		0		0		93
0		5		7		0		0		4		0		3		4		0		6		10		23		5		0		0			0		4			0		0		3		0		0		105
3		8		0		0		0		0		0		7		0		0		4		8		28		3		1		0			0		6			6		0		8		6		0		71
3		8		0		0		0		0		0		0		0		0		2		6		19		4		1		0			0		5			16		0		4		0		0		0
7		6		0		0		0		6		0		3		2		0		6		9		21		5		1		0			0		6			6		9		4		0		0		100
6		5		0		0		0		0		1		2		9		0		0		5		23		5		3		0			0		4			6		0		4		0		10		0
3		7		0		0		0		3		0		4		2		0		1		8		21		3		1		0			13		2			6		0		0		10		0		0
4		6		0		0		0		0		6		11		0		0		7		8		25		4		2		0			0		4			10		6		5		0		0		0
3		7		0		0		0		3		5		5		8		0		5		10		26		4		0		0			0		3			6		6		5		0		6		0
2		8		4		0		0		5		0		4		0		0		9		10		26		5		2		0			16		5			10		0		9		6		0		68
0		3		0		0		0		9		8		6		6		0		3		7		27		5		2		0			0		4			0		5		8		10		5		0
0		6		0		0		0		0		0		2		0		0		3		8		30		1		1		0			20		4			10		5		10		6		10		0
4		8		0		0		0		0		0		8		0		0		2		9		20		4		3		0			9		2			0		8		11		10		0		0
1		4		0		0		0		7		0		11		0		0		0		8		17		3		0		0			0		3			0		9		9		0		10		0
6		6		6		0		0		0		0		5		0		0		3		10		24		4		1		0			14		4			0		7		7		10		0		0
9		4		0		0		0		0		0		6		0		0		5		6		25		5		3		0			0		5			0		2		2		6		0		93
7		6		0		0		0		0		0		0		0		0		5		7		24		3		1		0			0		5			0		5		3		10		0		0
6		8		0		0		0		9		7		9		10		0		5		6		31		6		1		0			0		1			0		0		8		0		0		92
6		8		0		0		0		0		0		0		3		0		4		13		19		3		2		0			0		3			0		0		6		0		0		105
6		4		3		0		5		6		0		3		0		0		6		10		23		7		4		2			0		2			0		8		7		0		0		0
10		7		0		5		1		9		0		7		0		0		3		9		27		4		3		0			0		6			0		8		3		0		0		85
5		6		0		0		0		5		0		8		0		0		8		9		28		4		2		0			0		2			0		0		10		6		0		0
4		5		0		0		0		0		0		2		4		0		4		10		22		7		3		0			0		3			0		0		1		0		5		0
0		2		0		0		0		0		0		6		3		0		1		10		25		4		3		0			5		5			0		0		9		5		0		0
8		5		0		0		0		11		0		4		0		0		6		11		26		5		3		0			0		3			0		0		8		0		0		0
7		6		0		2		0		9		0		4		6		0		5		9		27		4		1		0			0		5			0		0		3		0		0		0
0		8		0		0		0		6		0		6		1		0		0		7		29		4		3		0			0		2			0		0		5		10		16		0
3		11		0		0		0		0		0		6		0		0		3		7		26		5		4		0			31		5			0		0		0		16		10		0
4		3		0		0		0		0		5		3		7		0		6		10		28		7		2		0			4		3			0		0		0		6		0		0
5		6		0		0		0		7		4		7		0		0		7		10		26		4		1		0			0		3			0		7		4		0		0		0
6		3		0		0		0		5		0		0		10		0		8		5		23		6		2		0			0		2			0		6		7		10		0		0
1		9		0		0		0		6		0		5		0		0		4		10		22		7		3		0			0		4			6		0		2		10		0		0
6		1		0		0		0		10		5		7		0		0		12		5		27		4		1		0			15		4			6		9		4		0		0		96
5		3		1		2		0		3		6		9		0		0		3		9		26		6		1		0			0		3			0		0		5		10		0		0
8		7		0		4		0		5		0		3		0		0		5		8		22		4		1		0			0		8			0		0		4		6		6		0
0		3		2		0		0		0		0		0		0		0		5		7		26		5		3		0			14		5			6		0		4		16		0		86
5		4		0		4		0		7		0		6		0		0		0		13		23		2		3		0			0		6			0		0		7		10		0		0
10		8		0		0		0		8		0		0		0		0		6		10		22		8		2		0			0		3			0		0		2		0		6		90
0		7		0		0		0		5		0		4		11		0		8		7		26		7		2		0			3		1			10		0		6		5		0		0
0		9		0		0		0		0		0		4		0		0		4		5		24		6		1		0			0		3			0		3		5		0		0		95
5		2		4		5		0		0		0		7		0		0		8		8		27		6		2		0			0		4			6		0		3		0		0		0
7		5		0		0		0		0		0		9		2		0		6		7		27		8		3		0			0		3			0		0		9		10		0		0
5		8		0		0		0		0		0		0		0		0		4		11		31		5		1		0			13		4			0		0		3		0		0		0
4		9		0		0		1		0		0		5		0		0		10		7		22		3		4		0			0		5			16		0		6		0		0		0
6		8		0		2		0		4		0		6		7		0		6		8		21		4		1		0			4		5			0		0		0		0		16		0
8		7		0		0		0		5		0		8		8		0		3		7		28		5		1		0			44		3			16		0		3		16		0		86
8		3		0		0		0		8		0		4		5		0		0		7		27		9		1		0			0		3			6		0		1		0		6		87
0		8		3		0		0		0		10		5		0		0		6		8		19		5		2		0			12		6			0		1		2		0		0		0
2		12		0		4		0		0		0		6		8		0		0		7		19		5		3		0			0		3			0		0		6		0		0		0
9		7		0		0		0		6		0		4		0		0		7		6		28		4		2		0			0		2			0		0		0		6		6		0
0		3		0		3		0		9		0		6		7		0		7		8		22		4		1		0			5		7			0		0		5		5		16		0
9		4		0		0		0		0		0		6		0		0		7		11		29		3		4		0			13		5			0		6		9		16		0		0
2		5		0		0		0		0		0		0		0		0		0		7		25		5		3		0			0		5			0		0		9		10		0		96
6		7		0		0		0		8		0		9		6		0		0		6		30		4		3		0			0		6			0		4		7		10		0		0
4		3		0		6		0		5		9		9		0		0		5		9		23		5		0		0			0		5			0		5		5		0		0		64
9		6		0		0		0		5		0		9		10		0		0		9		27		7		2		0			5		6			0		0		0		6		0		91
0		4		0		0		0		4		0		3		0		0		8		8		24		3		1		0			0		5			0		0		4		0		0		102
0		11		0		0		0		3		0		8		5		0		9		10		27		5		2		0			0		5			0		4		10		10		6		0
2		8		0		0		0		7		0		4		9		0		9		6		27		5		1		0			12		3			0		0		3		6		0		0
8		5		0		0		1		4		7		11		0		0		3		7		24		8		2		0			0		4			6		7		6		0		0		0
0		5		0		0		0		10		3		5		0		0		6		10		26		4		4		0			6		7			0		8		4		0		0		0
0		4		0		0		0		9		0		7		7		0		2		9		23		3		2		0			0		3			0		0		4		6		0		0
1		7		0		0		0		3		0		5		0		0		11		11		25		8		3		0			0		3			0		0		6		0		0		0
2		6		0		0		0		7		0		8		0		0		0		7		26		5		2		0			0		4			0		0		11		0		0		0
0		6		0		0		0		0		12		9		0		0		9		7		26		6		1		0			0		6			5		5		9		6		0		74
6		13		1		0		0		1		4		8		0		0		8		8		29		6		2		0			0		4			9		0		4		10		10		0
9		7		0		0		0		9		0		2		0		0		4		6		23		4		3		0			8		3			0		5		3		6		10		0
9		3		0		0		0		3		1		1		0		0		7		10		27		4		2		0			32		2			0		0		5		10		0		73
2		5		0		0		0		5		0		3		2		0		5		8		24		5		1		0			0		4			0		0		2		0		10		80
8		11		0		0		0		8		0		5		0		0		0		10		25		5		3		0			8		5			10		0		2		10		6		70
0		4		0		0		0		4		4		9		0		0		5		9		28		6		2		0			4		5			0		5		6		10		0		94
0		7		0		3		0		4		3		3		0		0		0		6		27		6		1		0			0		6			0		6		1		10		0		0
4		5		0		4		0		0		3		7		5		0		6		8		21		7		3		0			0		5			0		0		5		0		10		4
0		0		0		0		0		0		0		7		6		0		0		8		25		3		3		0			4		4			0		0		0		6		0		0
13		5		0		4		0		8		12		5		0		0		6		7		29		5		1		0			14		5			0		1		6		0		0		0
5		5		0		0		0		10		0		0		0		0		4		9		20		6		3		0			0		6			0		0		6		0		0		0
4		7		0		3		0		0		0		3		0		0		9		7		24		5		0		0			0		1			0		0		11		0		0		0
10		6		0		0		0		0		0		8		0		0		7		12		22		4		3		0			0		5			0		0		3		0		6		0
9		6		0		0		0		3		0		0		0		0		12		10		22		6		1		0			5		5			0		0		9		6		0		91
6		6		0		0		0		0		0		7		0		0		2		11		27		4		3		0			0		2			0		11		4		0		0		83
14		4		0		0		0		0		7		8		8		0		8		11		30		5		1		0			0		1			0		0		10		0		0		0
4		7		0		0		0		7		0		8		0		0		2		9		27		8		2		0			24		4			10		4		6		0		0		0
4		1		0		0		0		2		3		0		6		0		6		5		28		4		1		0			0		6			0		0		5		10		6		0
12		6		0		2		0		0		0		6		2		2		4		8		20		5		0		0			4		6			5		0		6		6		0		0
4		1		0		0		0		0		0		5		0		0		4		9		20		5		3		0			0		7			0		3		3		10		0		0
0		6		0		0		0		8		3		9		0		0		0		10		25		4		2		0			16		3			10		0		7		0		16		87
7		4		0		0		0		7		0		3		6		0		8		7		29		3		1		0			32		2			0		0		5		16		6		73
7		12		0		1		0		7		6		4		0		0		0		4		23		6		3		0			15		2			10		8		7		6		0		0
6		1		8		0		0		5		0		11		0		0		4		8		24		6		2		0			0		6			10		0		8		0		0		0
0		8		0		0		0		0		0		3		0		0		4		9		27		7		2		0			5		2			0		0		2		0		0		95
0		3		0		1		0		1		0		5		0		0		0		9		21		7		0		0			6		6			0		0		5		0		0		63
3		6		0		4		0		0		1		6		0		0		0		6		18		5		2		0			8		5			0		0		1		6		0		0
0		8		0		0		0		3		9		8		5		0		5		10		19		5		1		0			13		5			0		0		12		10		5		0
0		5		0		0		0		4		0		0		0		0		7		9		29		7		1		0			13		1			0		0		7		5		0		37
1		3		0		0		0		8		4		2		5		0		0		10		28		5		2		0			0		3			0		0		8		0		0		0
2		6		0		0		0		7		0		0		0		0		5		8		24		5		1		0			19		1			0		4		6		6		0		0
8		7		0		5		0		6		0		1		0		0		8		11		29		8		3		0			0		2			0		4		0		6		0		94
11		1		0		0		0		6		0		6		6		0		4		4		24		3		2		0			0		7			0		0		9		10		0		0
7		8		3		4		0		0		0		0		8		0		6		7		21		0		0		0			0		5			0		5		2		0		10		0
11		6		0		4		4		4		0		6		5		0		1		6		28		5		2		0			24		3			0		8		0		0		10		0
5		6		0		0		0		0		0		9		0		0		7		12		26		4		2		0			4		5			0		0		8		10		0		84
7		8		0		0		0		5		3		3		2		0		4		7		27		6		2		0			0		2			0		9		1		10		0		0
4		5		0		0		0		6		7		5		0		0		6		9		21		4		2		0			5		5			0		0		7		0		0		0
4		10		0		0		0		5		7		6		6		0		1		6		28		9		4		0			0		4			16		0		8		6		5		0
7		6		0		7		0		4		0		9		0		0		2		7		27		7		3		0			23		5			0		5		4		5		0		13
2		9		0		0		0		0		0		4		0		0		2		11		26		5		3		0			0		6			0		0		4		0		0		0
3		10		0		0		0		0		4		6		6		0		2		7		18		5		3		0			0		3			0		2		6		0		0		12
0		4		0		0		0		7		5		0		0		0		0		10		31		5		2		0			0		6			0		3		4		0		0		0
0		8		0		5		0		0		0		0		0		0		6		9		22		3		1		0			0		3			0		6		7		0		6		0
0		8		0		0		0		4		5		0		0		0		5		10		26		4		2		0			25		3			6		0		5		6		0		91
2		2		0		0		0		0		0		1		4		0		4		5		25		6		1		0			0		2			0		0		8		0		0		0
5		3		0		0		0		0		0		9		0		0		7		10		31		5		2		0			0		6			0		5		6		0		0		0
14		4		0		0		0		8		0		7		2		0		11		6		23		6		1		0			0		5			0		6		6		6		0		84
5		0		0		0		0		3		0		6		7		0		4		8		20		4		2		0			0		2			0		0		10		0		0		89
5		2		0		0		0		9		0		14		0		6		7		10		23		4		2		0			0		4			0		5		3		0		0		0
5		6		8		0		0		0		0		6		0		0		0		8		26		7		3		0			16		4			0		5		7		0		6		77
0		11		0		0		0		4		0		8		0		0		6		7		20		4		2		0			12		3			0		4		3		6		0		0
5		6		0		0		0		5		0		0		10		0		1		6		21		5		1		0			0		4			10		0		0		0		0		108
0		6		0		0		0		0		0		5		0		0		2		8		25		3		2		0			16		4			0		0		6		0		0		0
4		5		0		0		2		9		0		9		0		0		3		13		28		7		2		0			0		3			0		0		7		6		0		0
0		5		0		1		0		0		0		9		0		0		6		6		21		7		0		0			0		4			6		6		4		10		0		0
4		2		0		0		0		7		0		11		7		0		0		12		25		6		3		0			5		5			0		0		5		0		10		72
0		3		0		4		3		0		0		8		0		0		6		6		25		4		1		0			10		3			0		8		4		10		0		94
7		6		0		0		0		11		0		4		0		0		5		9		25		3		2		0			0		4			0		7		8		10		0		0
5		7		0		0		2		0		0		10		0		0		0		7		30		5		2		0			0		4			0		0		6		0		0		76
8		4		6		0		0		0		0		3		12		0		4		8		23		5		3		0			0		5			0		8		0		0		0		0
3		5		0		0		0		4		0		2		0		0		5		9		30		7		2		0			0		5			0		0		5		0		0		0
4		9		0		0		0		4		8		5		3		0		6		5		24		6		1		0			0		4			0		8		9		0		10		0
9		6		0		5		0		1		0		11		7		0		3		8		27		5		3		0			14		5			16		0		7		10		6		0
8		5		0		0		0		2		3		4		0		0		9		7		29		4		1		0			4		4			0		0		2		5		0		31
1		6		0		0		0		6		0		8		3		0		0		7		30		7		1		0			0		8			0		9		6		10		0		78
6		10		0		4		0		7		0		14		0		0		7		8		23		6		2		0			0		5			10		0		8		0		0		0
3		5		0		0		0		4		2		0		0		0		1		8		20		5		2		0			0		2			6		0		6		0		0		0
6		7		0		0		0		7		0		11		0		0		6		9		29		5		2		0			0		4			0		4		6		0		0		0
4		4		0		0		0		0		0		5		6		0		0		6		30		2		1		0			0		3			0		5		0		0		0		0
6		5		0		6		1		7		0		10		9		0		5		12		22		4		2		0			0		3			0		0		6		16		5		0
6		6		0		0		0		11		11		5		0		0		3		8		25		6		3		0			16		5			10		10		9		5		0		0
6		7		0		0		0		0		0		6		0		0		2		11		22		8		2		0			0		3			0		0		6		0		0		0
1		4		0		0		0		0		0		4		0		0		3		6		24		4		2		0			4		4			0		0		7		0		0		0
5		5		0		8		0		7		8		1		0		0		3		9		19		6		4		0			0		3			0		5		2		0		0		87
4		4		0		0		0		5		1		0		0		0		3		7		25		5		0		0			10		5			0		0		5		0		6		0
0		5		0		0		0		0		7		4		0		0		4		8		21		3		1		0			5		3			0		0		7		0		0		0
7		5		1		0		0		0		0		8		0		0		3		9		21		5		0		0			6		6			0		0		4		0		10		0
0		10		0		0		0		0		0		8		3		0		0		9		29		4		2		0			4		2			0		0		4		0		0		78
2		6		0		0		0		8		8		0		3		0		6		5		24		3		2		0			16		5			6		0		7		0		0		0
0		0		0		0		2		8		5		0		0		0		0		10		33		2		3		0			0		4			0		0		2		10		0		73
5		7		0		0		0		0		0		5		0		0		0		9		23		7		2		1			5		5			0		6		2		0		0		79
4		3		0		0		0		0		0		8		0		0		4		7		29		9		3		0			0		7			0		0		6		0		5		0
0		4		0		4		0		0		0		3		0		0		10		8		29		5		2		0			4		3			10		8		7		6		5		0
9		5		0		0		0		0		0		8		0		0		0		8		22		7		2		0			4		6			6		0		5		0		0		0
7		8		0		0		0		0		0		0		0		0		0		6		29		3		2		0			0		3			0		0		7		0		0		0
1		4		0		0		0		3		0		2		6		0		4		9		31		8		2		0			0		3			0		0		8		0		0		74
7		7		0		8		0		4		0		5		0		0		5		6		29		8		1		0			0		4			6		0		7		0		0		0
7		6		0		0		0		0		0		6		3		0		4		13		25		8		3		0			0		5			0		0		0		6		0		0
0		5		0		0		3		4		5		9		0		0		8		10		28		3		1		0			10		3			0		0		0		0		0		84
0		12		0		0		0		0		0		8		2		0		5		7		26		8		1		0			0		5			0		0		5		0		0		0
11		7		0		0		0		5		8		0		8		0		2		12		29		6		1		0			6		5			16		0		5		0		0		0
5		4		1		0		0		5		0		5		3		0		8		7		31		5		4		0			0		6			0		0		9		0		0		0
0		3		0		5		0		8		0		5		5		0		10		10		27		7		2		0			0		2			0		7		4		0		16		93
6		3		0		5		0		0		0		6		10		0		8		8		31		4		2		0			12		4			0		4		7		10		0		91
0		7		0		0		2		0		0		3		2		0		8		6		20		4		1		0			0		6			10		0		3		0		0		99
7		6		0		2		0		2		0		3		3		0		3		9		26		6		4		0			6		4			0		0		6		0		0		0
5		5		0		0		0		4		5		1		6		0		4		8		22		4		2		0			0		5			0		0		5		0		10		88
7		6		0		0		0		0		0		4		0		0		7		11		25		7		2		0			23		2			6		0		6		10		0		0
4		10		0		0		0		1		0		8		0		0		4		7		23		4		3		0			6		4			0		3		4		0		0		83
6		6		0		0		0		4		0		3		0		0		3		7		21		4		1		0			0		1			6		5		1		0		0		0
2		9		1		0		0		0		0		0		0		0		7		7		21		6		1		0			0		2			0		6		2		6		6		0
7		7		0		0		4		0		0		3		0		0		0		6		15		3		4		0			4		4			0		0		3		0		6		0
0		11		0		5		0		6		0		14		5		0		4		9		32		6		2		0			6		4			0		0		8		0		0		92
4		5		0		0		0		0		0		8		8		0		0		7		24		6		1		0			0		5			0		5		5		0		6		83
0		5		0		0		0		10		0		6		0		0		5		8		27		7		0		0			13		6			0		0		6		0		0		0
9		4		0		0		0		3		0		0		5		0		7		9		20		4		1		0			0		4			0		9		4		0		0		77
8		3		0		0		0		9		0		6		0		0		4		7		28		9		4		0			0		6			10		6		6		16		0		0
8		4		0		0		0		5		5		0		0		0		5		8		23		7		2		0			0		3			0		0		7		0		0		84
4		4		0		0		0		1		1		3		0		0		8		9		26		6		2		0			0		2			10		0		4		0		0		0
5		5		0		0		0		5		0		6		4		0		5		7		25		4		2		0			15		3			0		10		5		0		10		71
0		6		0		0		0		5		8		5		0		0		3		7		23		5		1		0			5		4			6		4		3		10		0		0
3		6		0		0		6		3		0		8		2		0		7		8		27		3		0		0			0		4			0		0		5		0		0		0
3		8		0		0		0		6		0		3		8		0		0		8		27		4		2		0			0		1			10		0		5		0		0		0
0		5		0		5		3		0		4		0		0		0		6		7		19		4		4		1			0		3			0		5		1		0		6		0
8		3		0		5		0		0		0		6		8		0		7		6		26		4		2		0			9		6			0		0		1		10		0		0
7		7		0		0		0		0		0		2		8		0		9		10		21		6		1		0			0		3			0		0		3		5		0		0
5		1		4		0		0		7		0		13		8		0		0		9		20		7		2		0			0		5			0		4		5		0		0		0
5		6		0		0		0		11		0		10		0		0		9		7		31		4		3		0			0		7			0		0		8		0		5		0
4		5		0		0		0		6		0		8		0		0		4		8		24		5		1		0			22		3			0		0		6		10		6		0
5		6		0		0		0		11		0		0		5		0		7		8		27		5		0		0			10		5			6		0		8		5		10		0
5		5		0		0		0		0		0		4		0		0		3		7		20		4		1		0			13		5			0		4		3		10		0		0
0		5		0		0		0		8		0		7		0		0		9		10		23		3		4		0			0		6			5		0		4		0		0		0
0		2		0		0		0		8		6		3		0		0		8		5		22		4		2		0			0		2			0		0		0		0		0		83
1		6		1		5		0		1		0		4		0		0		3		6		26		7		3		0			0		4			0		4		11		6		0		0
6		4		0		7		0		5		0		4		5		0		0		8		24		3		2		0			0		3			0		0		4		10		0		0
4		7		0		0		0		0		0		4		3		4		6		9		30		5		2		0			0		5			0		0		0		5		0		0
9		8		0		0		0		6		0		1		0		0		0		10		31		3		3		0			0		5			0		0		7		6		6		0
0		3		0		0		0		0		0		0		3		0		4		6		20		4		3		0			5		3			0		3		3		0		0		0
7		7		0		0		0		0		0		3		0		0		6		8		21		4		1		0			0		6			0		2		5		6		0		89
4		3		0		0		0		4		0		6		0		0		5		7		29		4		2		0			0		3			0		0		7		16		0		0
5		11		0		0		0		0		0		8		12		0		6		6		23		9		3		0			15		2			0		0		5		0		0		64
6		9		0		5		0		0		0		0		0		0		4		7		25		5		2		0			0		6			10		0		5		6		0		0
6		3		0		0		0		6		9		0		0		0		8		9		20		2		3		0			5		4			0		0		5		0		0		0
5		0		0		0		0		7		0		4		0		0		0		12		26		5		2		0			0		4			10		0		1		6		0		84
9		7		5		0		0		3		0		2		0		0		7		8		31		7		2		0			10		4			10		0		1		0		6		0
4		2		0		0		0		0		1		3		0		0		6		8		24		5		2		0			4		6			0		0		2		6		0		0
2		7		0		0		0		0		8		2		9		0		4		7		21		5		2		0			0		1			0		2		11		0		0		81
6		3		0		0		0		2		0		4		0		0		6		9		25		5		3		0			0		2			6		3		6		0		10		7
0		4		0		0		3		8		3		3		0		0		8		6		27		4		0		0			11		4			0		0		3		0		0		81
4		6		0		0		0		3		0		5		0		0		5		8		22		8		2		0			14		4			0		5		9		0		0		89
3		4		0		0		0		5		0		4		3		0		5		7		25		4		0		0			3		4			0		0		5		5		10		91
6		4		0		0		0		5		0		0		0		0		5		8		25		2		2		0			24		4			6		0		1		0		0		0
8		6		0		0		0		4		0		4		6		0		3		9		23		6		2		0			0		5			10		0		0		0		6		104
11		9		0		0		0		0		0		5		0		0		6		7		30		7		2		0			22		5			0		0		7		10		0		0
5		10		0		3		0		9		0		4		0		0		4		10		21		4		2		0			0		4			6		8		2		0		6		0
10		8		4		0		0		11		4		7		0		0		0		9		23		5		3		0			4		4			0		0		3		10		5		89
0		4		0		1		0		0		0		0		5		0		0		9		32		7		1		0			5		5			0		6		5		0		10		0
4		5		0		0		0		0		4		8		0		0		0		9		28		5		4		0			3		2			0		2		2		6		0		0
12		7		0		0		0		2		0		6		8		0		2		8		21		5		2		0			0		5			0		6		5		10		0		0
6		6		0		6		0		5		3		8		0		0		5		9		26		4		2		0			0		4			0		0		1		6		0		95
2		2		0		0		0		6		4		4		3		0		7		7		28		3		2		0			0		3			0		0		7		6		0		90
6		12		6		2		0		0		0		4		0		0		2		9		30		5		3		0			0		5			6		0		1		6		0		81
12		8		0		4		0		10		5		6		4		0		0		7		25		7		1		0			0		3			10		0		5		0		0		0
0		8		0		7		0		0		0		0		0		0		4		7		26		4		3		0			0		3			0		0		4		6		0		11
8		8		0		0		0		5		8		6		0		0		2		5		31		7		2		0			0		4			0		4		6		5		0		0
0		4		0		0		0		5		0		9		0		0		6		9		15		5		3		0			0		4			0		0		6		0		0		0
0		3		0		0		0		4		0		7		0		0		0		4		28		4		2		0			0		5			0		8		3		0		0		92
0		5		0		0		0		6		6		7		0		0		2		5		22		5		3		1			0		4			0		0		5		10		0		88
3		6		0		0		0		0		0		4		0		0		6		9		23		9		1		0			0		2			0		0		6		10		6		0
4		5		0		0		1		0		0		7		0		0		2		10		23		3		1		0			23		6			6		9		7		0		10		0
4		3		0		0		0		5		0		0		0		0		3		6		25		5		1		0			34		3			0		0		5		10		10		85
2		4		0		5		0		6		5		5		0		0		7		10		26		3		0		0			5		2			10		0		9		0		6		108
7		7		0		0		0		6		0		0		4		0		8		7		22		5		1		0			5		4			0		0		2		16		0		70
6		4		0		0		0		6		0		8		5		0		8		7		25		4		1		1			0		5			0		0		6		6		0		0
3		9		0		0		0		8		0		3		0		0		0		9		26		7		2		0			0		5			0		0		10		0		0		0
3		1		0		0		2		1		0		5		0		0		7		9		30		4		3		0			6		5			0		0		3		0		0		0
8		1		0		0		0		12		0		5		8		0		7		9		28		5		0		0			0		4			0		5		10		6		0		93
2		2		0		0		0		3		0		5		0		0		0		8		26		6		3		0			0		4			0		8		2		6		10		107
1		8		0		4		0		5		0		0		0		0		6		7		26		4		3		0			6		4			0		0		4		5		6		74
0		4		0		0		0		7		0		3		0		0		0		7		23		7		1		0			6		6			6		0		5		0		0		0
6		5		0		0		0		6		0		5		0		0		3		8		20		7		2		0			0		1			6		4		9		6		6		82
6		8		0		0		0		2		0		3		0		0		4		7		18		6		4		0			4		3			6		0		5		10		0		93
6		4		0		0		0		0		0		10		0		0		0		10		24		8		1		0			0		5			0		0		10		5		0		0
7		5		0		2		0		0		0		6		0		0		1		6		23		5		4		0			16		5			0		6		8		0		0		0
5		13		0		0		0		1		0		4		0		0		0		7		25		8		1		0			0		4			0		0		2		0		0		0
4		2		0		3		0		6		5		0		7		0		7		8		28		6		4		0			10		4			0		0		8		0		0		81
1		7		0		3		0		0		0		4		4		0		5		8		20		4		2		0			0		4			0		4		7		0		6		0
3		14		0		0		0		5		0		2		0		0		7		12		29		3		2		0			15		4			0		0		2		6		0		0
4		7		0		0		0		0		0		5		11		0		5		8		29		4		3		0			16		4			0		0		5		6		0		99
0		6		0		0		0		5		0		0		5		0		11		7		29		6		1		0			0		5			6		0		1		0		0		0
0		4		0		0		0		0		0		6		0		0		11		12		24		5		0		0			0		3			0		0		6		0		0		0
14		7		0		0		0		3		0		4		0		0		4		8		18		7		4		0			0		4			0		4		0		0		0		0
6		10		0		0		0		3		0		6		0		0		3		11		27		4		1		0			0		2			0		0		3		6		0		0
0		11		7		0		0		4		0		0		6		0		6		7		24		5		2		0			0		2			0		0		10		0		0		80
3		6		0		0		0		3		0		4		4		0		9		11		26		3		0		0			0		3			0		6		0		0		0		0
8		3		0		0		0		6		0		7		0		0		3		6		23		3		3		0			0		3			0		0		7		0		0		0
11		5		0		0		0		0		0		3		0		0		2		11		24		4		1		0			6		7			0		0		4		6		0		0
1		6		0		1		0		0		0		0		0		0		11		7		28		6		3		0			0		4			10		0		7		0		0		77
7		6		0		0		0		0		0		0		0		0		0		10		23		7		2		0			0		6			0		4		7		0		0		0
10		5		0		1		0		5		0		5		0		0		3		4		25		6		2		0			0		4			6		0		3		0		0		0
4		6		0		2		0		2		0		1		5		0		5		7		24		3		1		0			0		4			0		0		3		0		10		89
0		4		0		7		1		8		0		7		3		0		2		7		33		5		1		0			11		4			0		0		9		5		0		0
5		8		0		0		0		2		0		4		0		0		7		10		26		7		2		0			0		3			0		0		6		0		10		96
6		8		0		1		0		0		4		3		0		0		8		5		20		6		1		0			25		6			0		0		4		6		0		0
3		8		0		0		0		0		0		1		0		0		2		9		21		5		1		0			0		5			0		3		6		10		0		101
2		7		0		0		0		6		0		0		0		0		0		10		30		6		2		0			0		4			0		7		7		0		0		0
5		5		6		4		0		5		7		3		0		0		3		7		23		5		3		0			0		4			0		6		5		0		16		0
7		5		2		0		0		4		0		4		5		0		0		9		21		7		2		0			13		5			0		0		3		6		16		0
0		6		0		0		0		3		4		2		6		0		3		11		24		6		2		0			15		5			0		3		3		6		0		104
7		8		8		0		0		7		0		0		0		0		2		7		28		4		1		0			0		4			0		7		6		10		5		0
0		7		0		0		5		4		0		0		0		0		5		8		24		3		1		0			3		1			6		0		6		6		0		0
0		6		0		3		0		0		0		7		0		0		7		8		35		4		2		0			0		4			0		0		5		6		6		64
6		10		0		0		0		7		9		9		0		0		5		11		22		4		1		0			20		5			0		7		5		6		0		0
7		7		0		0		0		5		4		0		0		0		7		4		25		8		0		0			0		1			0		0		3		0		0		84
2		9		0		0		0		10		0		0		0		0		7		10		24		7		1		0			0		5			0		0		6		0		0		99
0		4		0		0		0		6		7		4		0		0		5		6		21		5		2		0			0		4			0		0		8		0		0		60
9		10		0		2		0		9		0		9		0		0		4		5		31		6		2		0			15		4			6		6		5		6		0		87
7		9		0		4		0		3		0		3		8		0		4		6		23		3		1		0			0		3			10		9		5		0		0		0
6		3		0		0		0		3		9		0		0		0		7		7		31		4		3		0			0		5			6		3		2		0		0		0
8		4		0		5		5		5		0		3		6		0		9		7		25		4		1		0			10		3			0		0		6		0		0		0
0		5		0		0		0		0		6		0		0		0		9		10		22		4		1		0			25		4			0		0		4		10		0		66
5		15		0		0		0		3		0		4		5		0		8		5		23		7		1		0			0		5			0		0		0		0		0		0
7		5		0		0		0		3		8		2		0		0		5		8		27		4		3		0			0		3			0		0		6		0		0		0
1		7		0		0		0		3		0		3		3		0		9		7		21		7		2		0			0		2			0		3		8		0		0		0
0		4		0		6		0		5		0		6		0		0		5		3		25		7		0		0			0		5			0		5		6		0		0		0
6		9		1		0		0		7		0		4		2		0		7		10		31		4		2		0			0		4			0		6		4		6		0		0
10		10		0		0		0		5		0		12		7		0		13		7		30		9		2		0			0		6			0		0		5		0		10		67
4		6		0		0		0		0		0		7		5		0		10		7		34		4		3		0			16		5			0		0		5		0		6		82
1		5		0		0		0		2		8		4		0		0		3		10		28		5		3		0			13		3			0		7		9		0		6		0
6		5		0		2		2		8		0		7		0		0		0		9		20		4		1		0			5		4			10		0		0		6		0		8
4		6		0		0		0		0		7		0		0		0		5		3		28		7		3		0			0		3			0		0		10		0		0		79
0		5		0		0		0		0		0		0		0		0		3		3		28		4		3		0			0		4			0		8		6		0		0		0
4		4		0		0		0		8		0		5		0		0		9		11		26		3		3		0			15		5			0		0		6		10		10		90
5		6		0		0		0		0		0		3		0		0		4		5		36		5		2		0			16		4			6		0		5		6		0		0
7		9		0		0		0		6		10		7		3		0		0		9		24		4		0		0			0		3			0		5		1		0		0		84
7		5		0		0		0		0		0		7		0		0		7		9		23		6		1		0			0		3			16		9		8		0		0		0
0		6		0		0		0		11		8		2		3		0		0		3		34		6		3		0			0		5			0		6		1		0		6		0
5		8		0		2		0		0		8		3		0		0		4		7		27		3		1		0			10		3			0		1		4		0		0		0
0		7		0		0		0		0		0		4		2		0		4		9		19		5		2		0			0		3			0		5		6		6		0		69
6		11		0		0		0		8		0		9		0		0		6		6		32		3		2		0			0		3			10		9		8		16		0		0
3		8		0		0		0		1		0		6		0		0		6		6		29		6		3		0			0		4			6		0		0		10		0		101
3		9		0		0		0		8		0		8		9		0		2		3		23		4		2		0			0		3			10		0		9		0		0		0
2		6		0		5		0		5		0		4		0		0		8		11		27		8		2		0			0		6			0		5		7		0		10		88
5		4		0		0		3		0		0		4		5		0		4		8		29		6		3		0			40		4			0		0		5		16		0		80
8		4		1		0		0		0		0		6		3		0		8		9		26		4		3		0			0		4			0		0		2		6		0		101
4		10		0		0		0		5		0		0		0		0		6		7		31		9		1		0			5		3			0		0		7		0		6		99
4		4		0		0		0		4		0		8		0		0		5		6		31		5		1		0			8		2			0		0		12		10		6		0
5		5		0		7		0		0		0		3		10		0		3		13		22		3		3		0			5		3			0		6		4		5		0		0
4		2		0		0		0		4		7		4		3		0		5		9		22		6		3		0			0		2			0		8		7		6		0		0
0		4		0		0		0		0		0		6		0		0		6		9		30		4		3		0			0		4			0		3		1		10		0		94
11		4		0		0		0		5		0		8		0		0		7		10		22		5		2		0			0		3			6		2		5		0		6		0
3		5		0		0		0		3		0		10		0		0		0		5		25		4		1		0			6		4			6		0		0		0		0		89
4		2		0		0		0		0		5		6		0		0		8		9		28		5		2		0			0		3			0		3		5		0		6		67
5		7		4		0		0		0		0		4		0		0		2		7		25		7		3		0			7		3			0		0		4		0		0		74
11		2		0		0		0		6		0		2		9		0		4		8		26		4		1		0			0		3			0		0		8		0		0		0
0		4		0		0		0		6		0		0		0		0		0		8		21		2		2		0			0		4			0		0		7		0		0		0
0		5		0		4		3		4		0		5		6		0		0		7		27		3		1		0			0		5			0		0		6		0		0		74
4		4		0		0		2		9		0		5		0		0		0		6		24		6		2		0			0		6			0		0		2		10		0		0
0		7		0		6		0		4		0		3		0		0		5		10		28		5		2		0			15		2			0		0		8		0		0		86
9		7		0		0		0		0		11		9		0		0		7		9		23		5		2		0			0		4			0		8		2		6		0		0
6		3		0		0		0		6		0		0		8		0		4		11		27		5		3		0			0		3			0		7		3		0		6		0
5		3		0		0		0		0		0		0		0		0		2		7		22		5		4		0			18		5			6		4		0		0		0		0
6		4		7		0		0		4		0		2		4		0		7		7		24		5		2		0			0		8			10		5		7		0		6		0
9		9		0		3		0		2		0		5		0		0		5		8		19		6		4		0			8		4			0		0		6		5		0		0
8		5		0		0		0		4		0		4		0		0		0		7		27		5		3		0			0		5			6		8		5		6		0		0
0		4		0		0		4		0		5		10		0		0		0		9		24		3		2		0			0		5			16		0		5		10		0		0
0		7		0		0		0		6		0		0		0		0		7		8		23		8		3		0			0		3			0		9		5		10		0		0
6		8		0		2		0		7		4		5		0		0		0		4		27		7		2		0			0		2			0		9		3		10		0		0
7		7		0		0		0		0		0		0		8		0		6		5		22		5		3		0			0		4			0		0		9		6		0		81
7		9		0		0		0		0		0		7		3		0		4		12		19		6		4		0			0		2			0		0		7		0		0		0
3		1		0		0		0		8		0		3		0		0		6		11		28		7		3		0			0		4			0		0		1		6		0		0
0		5		0		0		0		3		0		5		8		0		3		8		29		2		1		0			0		5			0		8		8		10		0		0
6		4		0		0		0		5		0		0		5		0		8		10		22		7		1		0			0		5			0		3		8		0		0		90
7		9		0		0		0		7		0		5		0		0		7		8		27		7		2		0			0		4			16		0		2		6		10		0
6		4		7		0		0		6		0		9		0		0		0		5		29		3		2		0			4		3			0		0		6		10		0		78
0		6		1		0		0		11		0		11		5		0		4		7		29		5		3		0			0		4			0		9		0		6		0		0
3		9		0		0		0		2		0		4		0		0		3		5		22		7		2		0			0		2			5		0		4		0		0		88
10		4		0		0		0		0		4		0		4		0		10		8		28		4		4		0			6		4			0		0		3		10		0		0
0		7		0		0		0		5		0		0		0		0		8		6		22		7		3		0			0		6			0		0		2		0		6		91
0		3		0		3		0		4		0		4		0		0		4		10		24		5		3		0			16		7			0		11		4		0		10		0
1		6		0		4		0		9		0		0		6		0		5		12		27		6		2		0			33		6			0		5		4		0		0		0
6		7		3		0		0		4		6		5		0		0		6		4		27		6		1		0			0		3			0		0		7		0		0		75
3		6		0		0		0		0		0		5		0		0		6		7		28		6		3		0			6		3			10		0		9		0		0		70
0		7		0		3		0		4		0		3		0		0		0		11		31		5		1		0			6		5			0		0		1		0		0		104
6		0		0		0		0		0		6		0		0		0		5		9		35		5		2		0			16		3			0		0		6		0		0		0
3		5		0		0		0		5		0		2		0		0		4		6		27		5		1		0			5		3			0		0		6		0		6		85
2		5		0		0		0		7		0		5		0		0		4		6		26		4		2		0			3		5			0		0		7		16		0		100
3		2		0		0		0		6		0		5		4		0		8		9		24		4		1		0			0		3			0		4		8		0		6		93
1		4		5		1		0		0		2		6		7		0		3		7		24		4		2		0			5		2			0		4		2		6		5		88
5		11		0		2		0		0		0		8		0		0		0		4		20		6		2		0			4		6			10		3		2		0		0		78
6		5		0		0		0		4		2		1		0		0		2		8		22		3		1		0			0		5			10		0		2		0		10		0
7		5		0		0		0		5		0		7		0		0		3		6		28		4		1		0			17		5			10		0		5		0		6		78
7		9		0		0		0		0		0		7		0		0		3		11		27		6		2		0			10		7			5		0		4		0		10		67
12		9		0		2		0		4		0		9		0		0		0		11		21		8		2		0			19		5			6		9		8		0		6		86
3		5		0		0		0		3		0		7		0		0		13		7		21		5		3		0			5		3			0		5		2		0		0		0
5		7		0		0		1		8		0		8		0		0		4		6		23		4		3		0			0		6			0		0		4		6		0		0
10		10		0		0		2		3		0		3		0		0		5		10		24		5		2		0			0		4			0		0		6		10		10		0
7		5		1		0		0		0		0		9		0		0		1		12		34		5		0		0			5		4			10		5		4		0		0		0
7		5		0		0		0		2		0		0		7		0		4		7		27		7		1		0			0		2			0		10		0		0		6		0
3		5		0		0		0		0		0		4		0		0		2		11		23		3		3		0			14		2			0		7		6		10		0		0
6		4		0		0		0		6		0		10		0		0		0		9		28		6		2		0			0		3			0		3		6		10		16		91
8		9		0		0		0		0		9		7		7		0		2		10		30		7		2		0			23		3			0		0		5		0		0		0
3		0		0		0		0		4		0		0		0		0		8		10		22		6		1		0			0		3			6		0		3		0		0		81
6		5		2		0		0		10		0		0		7		0		9		10		28		3		1		0			0		3			0		6		7		10		0		0
9		6		3		0		0		3		0		4		0		0		5		8		29		4		4		0			0		3			0		0		2		0		0		0
7		5		0		0		0		4		6		5		3		0		6		7		25		5		3		0			0		2			0		0		8		0		0		74
7		2		0		0		0		0		0		0		0		0		4		11		27		5		2		0			0		3			0		0		3		10		0		84
3		0		0		0		0		5		0		8		0		0		0		9		23		5		0		0			16		3			0		1		7		0		0		0
1		9		0		0		0		7		0		6		0		0		4		8		24		8		1		0			0		4			0		6		2		10		0		0
6		7		0		0		0		0		0		0		0		0		3		8		29		5		1		0			16		4			0		0		0		6		0		85
3		3		6		3		2		0		0		2		0		0		0		7		27		5		4		0			0		4			0		1		4		0		0		96
6		4		0		5		0		8		9		2		10		0		7		7		25		4		4		0			0		4			10		0		8		6		0		0
8		11		0		0		0		0		8		6		0		0		4		7		28		5		2		0			0		6			0		0		5		5		0		0
8		9		0		0		1		6		0		0		0		0		0		7		24		5		2		0			0		3			0		0		7		0		0		0
4		6		0		0		0		0		1		0		0		0		8		10		25		5		3		0			0		6			0		0		3		6		0		0
0		5		0		1		0		9		0		6		0		0		6		11		18		7		1		0			0		2			0		0		5		0		6		57
9		7		0		0		0		6		0		3		0		0		4		7		31		6		3		0			6		3			0		0		6		0		0		82
4		2		0		0		0		2		0		3		0		0		3		6		24		5		1		0			0		4			0		0		7		0		0		0
3		6		0		6		0		8		0		6		0		0		4		7		26		4		2		0			0		6			0		0		7		0		0		0
0		8		0		0		0		4		0		5		0		0		6		8		21		6		1		0			0		4			6		6		7		6		0		0
1		9		7		0		0		0		0		0		2		0		7		3		21		4		2		0			0		4			0		0		3		10		0		0
0		5		0		0		0		0		3		0		0		0		0		8		23		4		2		0			0		3			0		0		8		0		0		0
7		6		0		0		1		10		0		5		6		0		0		7		23		5		2		0			0		4			0		0		0		10		0		0
5		7		0		0		0		2		0		6		9		0		0		7		18		4		2		0			0		2			6		9		7		10		0		0
4		6		0		0		0		8		0		4		0		0		5		8		31		6		2		0			0		3			0		0		0		10		0		91
9		6		0		0		0		4		5		4		0		0		9		7		24		5		1		0			0		3			0		8		13		0		0		0
6		5		0		2		0		7		5		6		5		0		0		10		21		4		2		0			0		5			16		5		6		0		6		0
4		9		0		4		0		11		0		7		9		0		5		4		21		5		3		0			5		5			0		4		9		6		0		0
2		3		0		0		0		0		0		5		5		0		7		8		26		4		0		0			19		6			0		0		1		0		0		0
6		12		0		0		0		5		5		7		0		0		0		6		27		5		2		0			0		3			0		8		7		10		0		84
5		5		0		1		0		0		0		6		0		0		5		3		28		5		3		0			0		4			0		5		6		10		16		0
7		7		0		0		0		5		0		4		0		0		0		4		20		4		4		0			24		5			0		12		8		16		5		86
6		6		0		6		0		0		5		1		0		0		0		9		22		4		2		0			3		3			6		0		5		10		0		83
10		7		0		0		0		0		0		3		0		0		7		10		19		5		1		0			0		5			0		7		4		0		0		0
3		5		0		7		0		0		7		5		4		0		0		9		19		4		2		0			0		5			10		2		8		0		0		0
4		2		0		4		0		0		3		6		7		0		2		10		26		7		2		0			0		4			0		0		3		0		0		0
5		6		0		0		0		10		0		3		0		0		0		10		25		6		2		0			0		7			0		4		5		0		0		90
0		3		0		3		1		0		0		6		6		0		7		9		24		6		4		0			0		4			5		0		6		0		0		0
2		2		0		4		0		4		0		0		8		0		5		11		25		6		1		0			0		3			0		0		6		0		10		0
4		5		0		0		0		5		0		0		0		0		8		11		29		5		2		0			13		4			0		3		3		0		6		0
0		5		0		0		0		0		0		7		0		0		0		13		21		5		3		0			2		2			0		3		9		0		0		79
0		3		0		0		0		5		5		7		3		0		2		8		24		4		1		0			0		6			0		0		5		0		10		0
6		3		0		0		0		6		7		7		5		0		8		7		23		7		4		0			4		5			0		0		5		0		0		0
5		10		0		4		0		6		3		6		0		0		7		8		30		6		1		0			0		5			0		0		7		0		6		105
4		5		3		0		0		7		0		0		6		0		7		7		24		4		3		0			14		4			0		6		5		0		0		0
0		5		0		0		0		5		0		0		0		0		6		9		19		2		1		0			0		4			0		0		6		10		6		0
6		2		0		0		0		1		0		5		0		0		2		7		28		3		2		0			22		6			0		6		6		0		0		0
4		9		0		4		0		5		0		0		0		0		3		8		26		2		3		0			0		3			6		0		4		0		0		0
7		5		0		0		0		2		0		10		0		0		8		11		25		5		4		0			0		4			0		0		11		6		6		0
5		6		0		0		0		0		7		6		5		0		4		8		21		5		2		0			3		4			0		0		4		0		0		0
0		5		0		0		0		10		0		8		0		0		4		10		27		6		1		0			9		6			0		0		11		0		0		81
5		12		0		4		0		0		6		0		0		0		4		12		23		7		1		0			0		3			0		4		5		0		0		0
0		8		0		0		5		11		6		7		0		0		4		10		30		5		2		0			6		3			16		0		5		0		5		82
6		6		0		0		0		9		0		11		1		0		3		11		22		3		2		0			4		3			0		0		9		6		5		0
7		7		0		0		0		1		0		5		0		2		5		8		21		6		2		0			5		4			0		0		3		0		0		0
3		6		0		0		0		1		0		8		0		0		7		11		23		5		2		0			0		4			0		4		6		6		0		0
3		4		0		0		3		7		0		4		0		0		6		7		21		3		1		0			0		1			10		5		7		6		6		91
0		6		0		1		0		0		0		5		2		0		5		3		23		3		1		0			9		3			0		0		6		6		10		89
6		1		0		0		0		0		0		3		0		0		2		12		25		3		1		0			5		4			10		3		2		0		0		86
6		5		0		5		0		5		0		6		0		0		7		8		25		5		1		0			0		2			0		0		8		10		0		73
0		1		0		0		0		6		0		3		7		0		4		5		27		5		1		0			0		3			0		4		0		0		0		0
0		4		0		2		0		2		0		0		5		0		8		9		24		6		3		0			0		4			0		6		6		16		0		88
6		6		0		0		0		0		5		0		2		0		5		8		26		9		2		0			6		3			0		4		9		6		0		0
3		6		2		0		0		5		10		7		0		0		0		9		26		5		2		0			0		4			10		10		4		0		0		0
3		6		0		3		0		5		4		5		0		0		7		11		22		7		2		0			0		6			0		3		4		0		0		0
0		4		0		1		0		0		0		3		10		0		6		11		27		4		1		0			0		1			6		0		9		0		0		0
4		8		0		0		0		4		0		6		0		0		5		6		28		3		4		0			0		5			0		0		7		6		0		0
7		3		0		0		0		0		3		8		0		0		0		4		22		6		2		0			16		3			0		4		11		5		0		0
4		6		0		0		0		0		0		0		0		0		6		12		20		6		3		0			3		5			6		8		11		0		6		0
0		7		0		0		0		0		2		2		1		0		0		5		21		4		2		0			23		5			0		7		3		0		0		55
7		10		0		0		0		5		0		5		7		0		5		6		26		3		3		0			0		6			0		0		4		6		0		0
0		7		0		0		0		0		5		4		0		0		8		7		31		6		1		0			0		2			0		8		6		6		6		0
0		9		0		4		0		6		7		0		0		0		0		6		26		5		2		0			5		3			0		0		3		0		10		0
7		4		0		0		0		5		0		7		0		0		0		9		27		4		2		0			4		4			0		1		7		6		0		70
8		8		0		4		0		8		0		0		0		0		6		8		23		5		3		0			15		5			16		0		8		0		10		0
4		7		0		0		0		0		8		6		0		0		7		7		22		5		2		0			5		3			0		6		7		0		0		0
0		4		0		0		0		5		0		6		9		0		0		9		28		6		2		0			6		7			0		0		0		10		10		0
0		7		0		0		0		0		0		0		8		0		2		9		19		3		3		0			14		5			0		0		6		5		0		0
0		7		0		0		0		5		0		2		0		0		2		8		24		4		2		0			0		4			0		0		6		6		0		89
0		5		0		4		0		0		0		5		0		0		5		11		23		6		2		0			0		5			0		8		1		0		0		0
0		3		0		1		0		3		0		0		0		0		0		10		24		7		3		0			5		4			0		0		7		0		6		0
0		5		0		0		0		5		0		7		0		0		7		8		18		3		3		0			26		6			0		0		0		0		0		71
0		9		0		0		0		0		0		8		9		0		0		10		22		7		0		0			0		6			0		0		4		5		6		81
4		9		3		6		0		0		7		6		0		0		3		7		26		5		1		0			3		3			0		0		5		0		0		0
0		3		0		2		0		0		0		9		0		0		7		6		26		6		1		0			0		3			0		0		6		6		0		0
9		5		0		0		0		6		0		5		8		0		5		11		21		3		0		0			0		5			16		0		8		0		6		79
1		8		5		2		0		5		0		0		0		0		6		8		23		6		3		0			25		1			10		0		14		6		0		83
6		6		0		0		0		8		3		5		0		0		1		5		26		7		1		0			0		1			6		0		4		0		16		0
1		5		0		7		0		6		3		0		6		0		9		10		29		3		2		0			10		6			0		5		6		0		0		94
8		8		0		0		0		0		0		8		0		0		11		10		25		5		1		0			0		2			6		0		4		16		0		0
6		8		0		2		0		7		5		0		0		0		1		4		27		5		3		0			0		5			0		0		3		5		0		0
5		3		0		0		0		3		0		0		0		0		0		11		26		4		3		0			0		2			10		6		4		0		0		0
6		2		0		0		5		0		0		7		0		0		8		12		25		5		1		0			0		4			0		0		11		10		0		0
4		2		0		0		3		5		0		1		7		0		3		9		21		4		1		0			25		3			6		0		6		6		0		76
0		0		0		0		0		6		7		10		2		0		4		8		22		5		3		0			0		1			0		6		6		0		0		0
5		10		4		3		0		5		0		2		5		0		0		8		25		4		4		1			0		4			0		0		3		0		10		100
4		5		0		0		0		0		0		6		0		0		8		8		24		5		4		0			5		3			0		0		10		10		0		0
21		3		0		0		4		8		0		6		0		0		8		8		26		2		3		0			0		4			0		5		0		0		0		0
4		5		1		0		0		6		0		0		0		0		8		10		27		4		3		0			0		5			0		3		9		0		6		0
5		5		0		0		0		7		6		7		0		0		6		8		20		6		3		0			20		4			6		0		0		10		0		0
7		2		0		0		0		0		0		0		0		0		2		8		24		3		2		0			6		5			6		9		9		0		5		80
0		8		0		0		0		0		0		0		9		0		6		10		23		7		2		0			5		2			0		3		0		0		0		88
6		10		1		0		0		2		3		8		6		0		1		9		30		5		1		0			0		3			0		4		5		0		0		0
6		11		0		0		0		6		0		3		6		0		5		9		28		3		2		0			0		2			0		0		2		6		0		0
0		8		0		0		0		4		2		5		0		0		7		13		25		8		1		0			0		5			0		0		4		5		6		0
6		6		0		0		0		5		0		0		0		0		5		8		26		3		2		0			6		3			0		4		2		0		6		94
0		6		0		0		0		7		0		4		0		0		7		8		22		5		2		0			22		2			0		0		7		0		0		76
0		2		0		4		0		0		5		6		7		0		4		11		23		3		1		0			0		3			0		6		4		10		0		0
8		3		0		6		0		5		8		6		6		0		9		8		27		7		4		0			0		3			0		1		0		6		0		0
5		2		0		0		0		7		0		7		5		0		3		8		34		5		3		0			0		3			10		0		0		10		0		0
0		5		5		0		0		1		6		0		0		0		0		8		27		6		2		0			0		5			0		9		4		0		0		98
9		7		0		0		0		5		8		0		0		0		3		8		24		5		2		0			6		4			0		6		6		0		0		0
4		7		0		0		0		3		0		7		5		0		5		6		26		5		3		0			0		3			0		5		0		0		10		0
16		5		0		0		1		10		0		2		0		0		4		8		26		6		2		0			13		2			0		0		8		0		0		0
4		10		0		0		0		0		6		8		1		0		4		10		27		5		2		0			5		0			0		0		0		0		0		0
3		5		0		0		0		4		3		4		7		0		4		11		25		4		1		0			0		5			10		0		4		0		0		77
5		5		0		0		0		5		8		8		9		0		7		8		23		2		4		0			0		5			0		2		6		16		0		83
5		3		7		0		0		7		0		4		0		0		4		11		29		7		3		0			0		4			0		0		8		0		5		0
6		6		0		0		0		0		0		4		2		0		0		13		24		6		1		0			4		6			0		6		9		10		0		0
10		4		0		0		0		3		4		0		4		0		6		9		20		5		2		0			0		3			0		10		4		0		0		0
1		9		0		0		0		0		0		5		0		0		4		9		25		5		2		0			0		5			0		7		4		5		0		0
8		7		0		0		3		11		5		0		0		0		5		9		21		6		1		0			0		4			0		3		7		6		0		0
4		6		9		0		0		0		0		10		5		0		3		8		28		3		3		0			0		3			10		0		5		6		0		0
4		5		0		0		4		0		0		0		0		0		6		7		21		5		0		0			5		5			0		0		4		0		0		0
4		10		4		4		0		0		0		6		0		0		2		7		25		3		3		0			10		3			0		0		6		6		16		100
9		6		0		0		0		0		0		4		0		0		5		9		24		5		3		0			13		5			0		5		12		5		16		0
7		5		0		0		0		6		0		7		5		0		2		8		24		4		2		0			20		1			10		0		4		0		0		0
7		8		0		0		0		2		0		8		4		0		0		6		27		6		3		0			0		6			0		0		8		10		0		0
2		3		0		0		0		3		0		11		0		0		4		12		25		9		3		0			0		4			0		10		0		6		0		94
10		8		0		0		0		8		0		6		5		0		8		6		19		8		2		0			0		3			6		0		2		0		0		0
4		9		0		5		0		0		7		0		0		0		0		6		26		3		2		0			20		6			0		0		9		0		0		83
7		9		0		0		0		6		0		6		0		0		6		10		22		4		1		0			0		5			0		3		4		0		0		90
0		5		0		0		0		0		0		0		0		0		8		8		26		7		2		0			0		4			0		0		10		0		0		0
3		4		0		4		0		0		3		4		4		0		6		8		28		7		1		0			0		4			0		0		10		5		0		109
7		7		0		0		5		6		0		6		0		0		6		10		25		5		2		0			0		4			0		7		0		0		0		99
0		0		0		1		0		0		0		0		0		0		3		8		25		7		2		0			6		4			0		0		2		0		10		0
8		8		0		0		0		0		0		0		0		0		0		11		24		5		2		0			16		4			0		0		5		0		10		0
3		4		0		0		0		0		0		0		7		0		6		5		27		6		3		0			13		3			0		0		6		10		0		0
5		2		0		0		0		0		0		0		9		0		3		11		26		2		2		0			0		7			0		0		1		6		0		94
8		6		2		0		0		0		10		5		3		0		5		6		20		8		3		0			0		5			0		5		3		0		0		0
3		8		4		0		0		0		0		2		0		0		0		7		30		5		4		0			0		2			0		0		7		0		0		90
4		5		0		0		0		6		0		5		0		0		3		10		25		4		1		0			0		3			6		5		0		0		0		0
9		10		1		0		0		6		0		0		0		0		5		7		29		6		2		0			10		6			10		0		5		0		6		77
11		6		0		0		3		3		6		7		0		0		0		11		24		3		1		0			23		5			6		4		0		0		0		76
9		3		0		0		0		0		3		0		0		0		0		7		26		6		2		0			0		3			10		0		9		0		0		84
4		3		0		0		0		4		0		7		0		0		4		11		26		7		1		0			0		4			0		4		7		16		0		0
4		5		0		0		0		8		0		0		0		0		0		7		19		4		1		0			0		3			0		0		3		0		0		0
6		2		1		0		2		0		0		0		0		0		5		6		25		3		2		0			0		2			0		0		5		0		0		93
0		7		0		0		0		1		0		6		0		0		2		5		23		5		4		0			15		2			0		2		10		0		6		0
0		3		0		0		0		6		0		11		5		0		0		8		27		3		1		0			15		4			0		0		8		16		0		101
6		4		6		0		0		0		0		0		4		0		7		7		29		6		3		0			0		6			0		0		7		6		5		0
2		10		0		4		0		0		0		7		0		0		0		7		22		6		2		0			11		3			0		0		3		0		6		88
9		6		0		3		4		5		0		0		6		0		5		8		24		2		2		0			15		4			5		0		5		0		0		0
2		6		7		0		0		5		0		7		6		0		4		9		29		2		3		0			0		3			5		4		8		6		0		0
5		4		3		0		0		6		0		3		7		0		5		9		22		6		1		0			35		2			0		9		4		10		0		88
4		6		0		0		0		1		0		2		3		0		0		7		27		3		1		0			0		4			16		0		4		0		0		92
6		8		0		0		0		0		0		5		0		0		3		10		26		6		0		0			0		2			0		7		2		0		10		102
0		6		0		0		0		6		0		6		8		0		7		8		30		5		1		0			28		2			0		0		5		10		0		89
7		4		0		4		0		7		0		0		0		0		4		7		20		4		2		0			0		4			5		5		12		10		0		0
12		2		0		0		0		7		5		6		8		0		3		6		20		5		3		0			5		5			0		6		8		10		0		0
6		1		0		1		0		4		0		0		5		0		4		5		27		5		2		0			0		5			0		0		9		0		0		0
4		10		0		0		0		0		0		0		0		0		7		12		21		7		2		0			4		6			6		7		2		0		0		0
9		7		0		0		0		3		0		3		0		0		0		7		26		5		4		0			0		3			16		7		4		5		0		0
6		7		4		5		0		3		0		5		0		0		5		5		16		4		1		0			0		4			0		2		5		0		0		0
4		8		8		0		1		0		0		3		1		0		7		9		26		5		2		0			0		4			0		0		4		10		0		98
0		4		0		0		0		6		0		0		0		0		6		8		20		4		1		0			13		7			0		2		6		0		10		75
0		5		0		0		0		6		0		0		0		0		4		9		17		5		2		0			6		5			0		0		0		6		0		73
8		5		0		8		0		7		0		6		0		0		10		7		31		7		2		0			0		6			0		1		7		6		0		0
5		2		0		0		0		0		0		3		5		0		8		6		19		6		2		0			14		3			0		0		8		10		10		0
11		9		0		0		0		4		0		0		7		0		4		12		22		2		2		0			12		2			5		0		2		16		0		0
6		7		0		6		0		0		0		4		0		0		4		6		29		7		0		0			25		4			0		0		0		0		0		0
2		7		0		0		0		7		0		5		0		0		5		8		22		4		2		0			0		5			0		0		6		0		6		0
0		4		0		0		0		3		0		1		3		0		2		8		25		4		2		0			5		4			0		0		6		10		0		0
7		2		0		0		0		5		0		1		0		0		7		9		27		4		2		0			0		4			0		0		8		0		0		94
4		5		0		0		0		0		0		4		0		0		7		4		25		3		1		0			0		3			0		0		5		0		0		0
7		5		0		5		0		7		0		0		6		0		4		10		27		3		2		0			16		4			10		3		6		0		0		0
8		4		0		0		0		0		0		10		0		0		5		9		21		5		1		0			4		4			0		0		5		10		0		105
0		5		0		0		0		1		4		1		0		0		7		6		27		5		1		0			5		5			0		0		5		0		0		0
5		5		0		0		0		7		0		0		3		0		6		11		26		4		1		0			4		4			0		0		5		10		0		0
11		4		0		0		0		6		0		7		0		0		5		12		27		7		0		0			0		4			0		0		4		0		10		0
10		7		0		0		0		4		0		4		4		0		6		8		29		3		3		0			5		5			0		0		4		16		0		0
3		3		0		3		0		8		0		0		0		0		4		10		23		3		2		0			0		7			0		0		3		6		0		0
4		9		0		0		0		0		0		7		3		0		10		9		25		5		4		0			0		2			0		1		0		0		0		0
3		6		5		0		0		0		9		8		8		0		0		9		22		4		4		0			33		3			0		2		5		0		0		73
9		1		0		0		0		9		0		7		5		0		6		6		25		4		1		0			0		3			0		5		10		0		0		0
6		6		9		0		0		0		0		10		0		0		0		12		15		4		1		0			0		3			0		9		5		6		0		0
0		5		0		0		0		11		4		2		9		0		8		8		28		4		3		0			0		3			0		0		7		6		0		76
10		2		0		0		0		11		0		0		7		0		4		3		18		7		4		0			0		4			0		0		4		10		0		72
5		6		0		0		2		7		0		3		0		0		6		4		19		4		2		0			0		4			0		0		4		0		6		103
6		6		0		0		0		8		0		3		6		0		4		10		25		2		2		0			6		4			0		0		5		0		10		0
3		6		1		0		0		0		0		7		0		0		5		9		27		7		4		0			14		6			0		0		6		10		0		75
5		8		0		0		0		0		0		0		0		0		0		7		28		7		3		0			0		3			10		0		3		6		0		0
0		6		0		0		0		8		0		3		5		0		5		8		23		3		2		0			0		4			5		0		2		0		0		0
5		3		0		0		0		0		0		4		7		0		2		9		25		7		4		0			0		4			0		0		3		0		6		88
8		2		0		0		0		8		6		6		0		0		0		9		24		1		0		0			4		3			0		0		9		6		0		82
9		2		0		0		0		10		0		5		0		0		6		8		24		4		3		0			0		4			0		0		1		0		0		89
3		0		4		0		0		0		3		6		0		0		0		4		26		8		3		0			5		1			0		0		6		0		0		78
8		8		0		0		0		5		0		7		0		0		0		6		23		4		3		0			6		3			0		6		10		6		0		0
6		12		4		0		0		7		0		0		0		0		7		9		29		3		0		0			0		4			0		2		2		0		10		0
6		4		6		0		0		0		0		7		0		0		12		8		27		4		4		0			5		4			0		0		4		6		0		0
0		4		0		5		0		7		0		7		0		0		3		7		24		8		3		0			25		6			6		0		5		0		0		0
0		2		0		0		0		0		0		6		0		0		3		8		24		4		2		0			0		5			0		2		8		10		10		0
0		5		0		0		0		5		0		10		0		0		5		6		27		3		3		0			6		3			0		5		6		0		0		0
2		7		3		3		0		8		11		3		0		0		6		6		25		3		2		0			0		4			0		0		4		6		0		0
4		5		0		0		0		4		0		7		0		0		7		11		28		4		1		0			0		4			0		0		1		0		0		117
4		9		0		0		0		5		12		5		6		0		0		7		26		4		2		0			0		2			6		0		3		0		0		0
13		6		0		0		0		3		0		0		0		0		0		5		23		6		3		0			0		3			0		0		5		5		0		0
11		5		0		0		0		7		5		9		0		0		5		9		18		4		1		0			0		5			0		14		0		0		10		0
4		5		0		0		0		0		0		4		4		0		5		10		23		5		1		0			6		5			6		0		0		6		6		0
8		7		0		0		0		6		0		3		0		0		7		6		19		2		2		0			14		5			0		5		9		0		0		0
0		8		0		0		0		11		6		9		1		0		7		9		21		3		2		0			0		2			6		0		3		0		0		0
0		10		0		0		0		6		0		6		0		0		6		8		23		6		2		0			0		6			0		6		6		0		0		0
3		4		0		4		0		4		0		4		0		0		2		7		23		5		3		0			0		3			0		3		5		0		0		90
11		7		0		0		0		2		0		0		0		0		0		6		23		5		3		0			0		3			10		7		3		10		10		0
0		6		0		0		0		0		0		5		4		0		6		9		29		5		1		0			14		3			0		0		4		10		0		0
4		3		0		0		0		6		0		9		7		0		4		10		20		6		1		0			0		4			6		0		5		0		0		90
0		7		0		0		0		2		9		0		0		0		5		9		26		5		4		0			0		3			16		5		6		0		0		0
7		3		0		5		0		0		0		3		2		0		4		7		21		3		1		0			0		4			0		0		5		0		0		83
10		9		0		0		0		9		0		0		0		0		0		8		26		7		2		0			0		6			0		0		4		10		0		80
4		8		0		4		0		8		0		11		3		0		6		8		21		8		1		0			10		4			6		6		5		0		0		91
6		7		0		0		0		4		0		0		0		0		12		6		24		5		0		0			0		4			0		6		8		6		0		87
0		5		0		0		0		0		0		0		0		0		0		7		24		7		3		0			0		4			0		0		4		10		0		94
2		2		0		0		0		1		0		4		0		0		5		13		23		4		2		0			15		5			0		0		5		6		0		0
8		7		0		0		0		3		7		5		0		0		3		9		20		6		3		0			0		5			0		8		9		10		0		0
5		7		0		3		0		6		0		1		0		0		3		9		27		6		1		0			6		6			5		5		4		0		6		77
4		5		2		0		0		5		0		4		0		0		2		12		21		2		1		0			15		4			0		0		0		0		0		0
6		5		0		0		0		0		9		0		0		0		4		5		21		7		1		0			0		4			0		0		5		0		6		93
4		9		0		0		0		0		6		2		0		0		6		8		24		5		3		0			15		6			0		0		4		0		0		89
0		8		0		0		0		0		0		3		0		0		10		10		21		2		1		0			13		2			0		0		9		6		0		97
0		5		0		0		0		0		6		9		0		0		5		9		21		3		2		0			0		4			0		0		9		10		0		0
3		3		0		1		0		0		0		0		0		0		6		6		23		7		2		0			0		2			0		0		5		0		0		0
7		5		0		0		0		0		0		7		7		0		2		6		25		4		3		0			0		3			0		0		8		10		0		0
7		6		2		1		0		0		8		4		0		0		3		8		21		4		3		0			0		4			0		0		9		0		0		0
2		3		0		3		0		4		5		0		5		0		7		6		19		5		1		0			6		5			0		0		4		6		10		0
4		7		0		4		6		4		0		0		9		0		0		8		27		4		2		0			12		4			5		0		4		6		0		104
2		3		0		0		0		0		0		6		0		0		4		10		25		6		4		0			0		4			0		0		9		10		0		0
0		5		0		0		0		0		5		8		0		0		4		7		20		7		4		0			0		4			0		0		6		16		0		0
3		7		0		0		0		5		0		5		9		0		7		10		22		5		4		0			0		4			0		0		4		10		10		0
1		4		0		2		0		8		6		6		0		0		3		4		24		7		2		0			14		7			0		0		2		6		10		63
0		4		0		4		5		0		6		7		5		0		6		10		24		6		2		0			9		3			0		0		6		10		0		71
4		4		0		0		0		2		0		3		7		0		4		8		26		4		2		0			0		5			0		0		9		0		0		0
0		6		0		3		0		9		0		6		0		0		4		7		26		5		2		0			15		2			0		5		8		0		6		81
4		4		0		4		0		0		0		5		0		0		4		10		24		4		1		0			4		3			0		4		8		0		0		0
3		7		5		0		0		4		0		5		0		0		4		8		24		5		1		0			0		2			0		5		6		0		0		106
2		0		0		0		0		0		0		5		8		0		5		8		24		4		3		0			0		4			6		5		5		10		5		0
6		6		0		2		0		4		0		9		0		0		0		11		35		5		1		0			13		3			0		6		6		0		10		86
6		6		0		3		0		4		0		0		0		0		8		8		19		5		1		0			5		6			0		6		7		10		0		0
5		7		0		0		0		0		8		1		0		0		0		8		27		4		2		0			0		7			0		7		7		10		0		0
5		8		0		0		0		0		0		10		0		0		7		8		27		5		1		0			6		3			10		0		6		0		0		0
5		9		0		0		0		0		0		10		0		0		2		10		27		1		2		0			0		0			10		0		5		0		0		0
5		7		0		0		0		0		0		4		0		0		6		3		19		4		2		0			0		5			0		0		2		10		0		85
0		4		0		0		0		0		0		4		0		0		0		11		24		3		2		0			0		4			0		0		6		0		0		0
3		11		0		0		0		2		0		6		8		0		7		8		25		6		1		0			0		3			10		0		7		0		6		0
7		7		0		0		0		5		6		11		6		0		5		8		15		8		2		0			19		5			0		0		0		0		0		0
7		6		3		0		0		6		0		9		5		0		5		10		25		7		4		0			0		4			0		0		9		0		0		91
4		9		0		0		0		9		0		4		11		0		0		7		24		4		4		0			0		4			6		0		2		0		0		0
7		8		6		0		0		2		0		13		6		0		2		11		19		6		1		0			0		3			0		0		4		6		0		0
4		11		0		0		0		8		10		3		0		0		0		8		20		5		2		0			0		3			0		0		5		0		0		0
7		4		0		0		0		5		0		9		7		0		0		8		22		7		1		0			0		5			6		5		11		0		0		102
7		3		0		0		0		6		0		6		0		0		5		7		27		4		2		0			0		2			0		0		8		10		6		0
4		11		0		0		0		0		0		6		0		0		0		7		22		3		2		0			9		5			0		0		10		0		0		77
7		6		0		0		0		0		0		0		7		7		8		9		27		6		2		0			4		4			0		0		4		0		0		0
4		10		0		0		0		0		0		4		0		0		7		7		22		2		2		0			10		2			10		0		6		10		6		94
3		5		0		0		0		7		0		5		0		0		6		6		29		4		2		0			24		4			0		0		2		0		16		85
12		8		4		0		0		5		0		6		0		0		3		13		29		5		1		0			12		4			6		8		5		0		10		0
6		6		0		0		0		6		0		9		0		0		6		6		22		3		2		0			5		4			0		0		8		16		0		93
4		6		0		0		0		6		0		4		0		0		5		7		30		5		1		0			0		1			0		8		4		10		0		0
5		9		0		0		0		5		6		7		0		0		8		3		24		4		1		0			0		3			0		0		7		0		0		90
5		6		0		0		0		5		0		6		3		0		3		7		22		10		3		0			0		6			10		0		5		0		6		0
5		6		0		0		0		2		1		9		0		0		6		9		24		7		3		0			6		2			0		6		7		6		0		81
9		0		0		0		0		5		9		0		6		0		0		9		24		2		2		0			0		2			0		0		11		0		0		87
0		5		0		0		0		4		7		5		0		0		0		11		22		5		1		0			0		6			6		5		2		0		0		90
11		11		0		0		1		5		8		0		0		0		0		7		28		5		1		0			0		2			0		5		1		10		0		0
11		8		0		1		0		6		7		0		0		0		2		10		26		5		3		0			6		2			6		7		6		10		0		0
8		3		0		0		0		6		0		8		0		0		6		9		22		5		0		0			6		5			0		0		12		0		0		0
3		5		0		0		0		0		5		4		6		0		2		6		26		7		1		0			0		5			0		0		3		0		0		0
9		3		0		0		0		4		0		5		0		0		4		4		26		4		2		0			0		2			10		6		3		0		10		90
5		5		0		8		0		5		0		3		0		0		5		13		31		4		1		0			4		5			0		5		7		10		10		74
5		8		0		0		0		0		0		0		9		0		5		7		22		5		2		0			5		4			6		3		0		0		0		0
5		6		7		0		0		0		0		0		0		0		0		11		29		6		2		0			4		6			0		0		3		0		0		87
0		5		5		0		0		7		0		4		10		0		4		7		27		5		3		0			33		3			6		1		6		6		0		0
3		6		2		0		0		2		5		1		5		0		7		8		28		5		1		0			0		5			0		0		7		0		10		0
10		4		0		2		0		8		0		0		8		0		4		8		22		4		4		0			4		4			0		0		4		16		0		0
2		3		5		0		0		0		0		8		0		0		4		3		26		6		4		0			0		3			0		0		0		0		0		0
5		7		0		0		0		0		2		6		9		0		6		7		25		4		3		0			0		6			6		0		2		10		0		79
4		8		0		0		0		4		0		0		0		0		8		7		23		7		1		0			0		4			0		0		7		0		0		75
5		4		0		0		0		0		0		7		0		0		2		6		28		7		1		0			0		6			0		0		6		0		10		0
3		3		0		0		0		3		0		0		0		0		6		10		29		6		0		0			4		5			0		0		3		10		10		103
6		6		0		0		0		7		0		7		0		0		0		7		23		5		3		0			9		4			0		4		5		6		0		83
8		5		0		0		0		0		0		3		0		0		5		6		18		6		1		0			0		1			0		5		5		10		0		0
7		8		0		0		0		0		0		6		0		0		0		8		25		3		3		0			0		4			0		7		5		0		16		86
3		7		0		0		0		0		0		0		6		0		10		8		28		6		3		0			22		3			10		0		5		6		0		0
12		8		0		0		0		5		0		6		0		0		3		7		21		6		1		0			0		5			10		0		8		6		6		22
7		13		0		3		0		7		0		0		0		0		5		10		29		8		3		0			16		5			0		0		5		0		0		83
7		9		0		2		0		5		4		7		0		0		7		7		29		5		2		0			0		3			6		3		1		0		0		91
5		8		0		0		0		5		0		4		13		0		2		9		25		6		2		0			0		6			0		0		6		0		0		0
0		8		0		0		0		3		0		0		0		0		0		7		18		6		2		0			0		6			10		0		0		0		0		86
5		1		0		0		0		2		0		11		0		0		8		6		28		7		1		0			0		2			0		3		0		0		6		0
4		4		0		0		0		0		0		7		0		0		2		6		23		5		3		0			3		4			16		0		2		0		10		82
3		4		0		0		0		0		0		6		0		0		4		9		29		6		1		0			14		3			0		4		9		0		0		102
10		4		0		0		0		7		0		5		0		0		0		10		21		7		4		0			0		3			6		0		4		10		0		79
6		6		0		0		0		6		5		0		0		0		0		6		20		6		3		0			0		3			0		10		3		0		0		86
5		0		0		0		0		6		0		8		6		0		0		9		23		6		1		0			0		5			0		0		4		10		0		11
2		7		5		1		0		3		0		9		0		0		8		9		29		6		3		0			0		6			6		7		4		10		0		0
8		4		0		0		0		4		0		4		0		0		0		7		22		5		0		0			0		4			10		3		6		6		0		98
0		5		4		0		0		0		0		6		0		2		4		7		21		6		0		0			16		4			0		0		3		10		6		0
3		4		0		2		0		9		0		0		0		0		3		9		29		6		1		0			24		4			0		7		8		0		0		0
1		3		12		2		0		4		0		6		0		0		3		6		29		5		3		0			0		4			0		0		6		5		0		0
0		2		0		0		0		0		0		5		12		0		8		10		29		6		3		0			6		7			0		0		4		10		0		78
3		8		0		0		0		7		0		2		0		0		8		7		29		5		2		0			0		1			0		7		4		0		0		88
7		7		9		0		0		5		0		0		5		0		3		8		26		6		3		0			0		3			0		9		3		0		0		0
4		7		0		0		0		1		0		2		7		0		11		10		20		6		0		0			0		4			0		4		5		0		0		0
4		5		0		1		0		2		0		3		7		0		5		10		21		4		2		0			14		6			0		0		3		0		0		74
7		8		0		0		0		11		0		8		5		0		8		10		23		4		4		0			16		3			0		0		3		0		0		76
0		5		0		4		0		4		6		9		0		0		9		7		34		3		1		0			0		4			0		6		6		6		10		85
5		9		0		0		0		4		0		8		4		0		2		8		26		4		4		0			12		5			0		0		5		0		0		85
3		7		0		0		0		6		0		4		4		0		7		8		21		3		3		0			0		5			0		0		6		10		5		0
4		9		0		5		0		7		2		5		0		0		3		8		27		5		2		0			8		5			0		7		4		10		0		0
4		8		0		0		0		0		0		0		6		0		9		3		26		3		2		0			0		1			10		0		9		0		0		0
8		8		0		0		0		1		4		5		0		0		2		9		33		7		1		0			0		5			0		6		3		6		0		0
2		4		0		0		0		5		0		7		7		0		20		6		25		6		1		0			0		4			0		5		9		6		0		0
10		9		0		0		0		1		0		5		0		0		3		4		25		7		0		0			0		1			0		0		12		0		0		0
5		2		0		0		0		5		0		5		4		0		2		9		23		4		2		0			0		7			0		0		5		0		0		0
4		6		0		0		0		0		0		5		3		0		6		5		25		2		1		0			0		7			0		0		9		0		0		0
7		8		2		2		0		0		0		8		0		0		0		7		31		5		1		0			0		3			0		0		5		0		0		78
7		7		0		0		0		4		0		8		0		0		4		6		21		3		1		0			0		2			6		5		7		0		0		87
4		7		0		0		0		8		0		5		0		0		4		12		24		4		3		0			0		6			10		1		6		0		0		69
4		12		0		0		0		8		0		4		5		0		0		8		23		4		3		0			6		5			0		0		3		10		0		0
6		6		0		0		0		0		4		3		0		0		10		10		21		3		3		0			0		3			6		7		4		6		0		0
8		10		0		1		0		0		0		5		0		0		3		9		22		1		2		0			0		4			0		3		7		0		0		0
8		6		8		0		0		6		6		4		0		0		7		8		22		5		2		0			10		4			0		0		3		6		0		94
2		13		0		0		0		3		8		0		0		0		3		8		23		6		4		0			0		4			0		3		5		10		0		0
8		8		0		0		0		10		6		5		0		0		5		5		21		2		3		0			0		5			10		8		4		10		6		91
3		5		0		0		0		8		0		0		0		0		7		7		27		6		1		0			6		5			0		4		7		6		0		0
0		4		0		0		0		3		4		8		6		0		4		9		30		4		2		0			0		4			0		0		5		10		0		0
1		5		0		0		0		6		0		10		0		0		0		7		32		4		2		0			0		4			0		0		5		0		0		93
0		6		0		0		0		8		4		6		11		0		0		4		24		3		2		0			0		7			10		0		7		0		0		0
5		5		0		0		0		7		1		4		0		0		4		11		29		4		2		0			0		4			0		0		2		16		0		0
0		9		0		7		0		0		0		4		0		0		3		9		30		9		3		0			0		5			6		4		4		6		0		0
7		4		0		0		0		9		0		4		0		0		2		7		29		2		4		0			0		5			0		7		4		0		0		0
8		3		0		0		0		0		0		6		4		0		2		7		27		5		3		0			0		4			0		0		10		6		0		86
8		4		0		0		0		6		0		5		0		0		6		9		25		6		1		0			15		4			0		0		0		10		6		93
7		8		0		0		0		0		0		0		4		0		7		8		24		4		2		0			5		4			0		5		2		0		0		92
0		5		0		0		0		0		3		2		6		0		9		8		27		2		1		0			0		5			0		4		8		10		0		72
0		3		0		0		0		0		6		8		0		0		4		9		28		1		1		0			0		1			0		0		10		0		0		77
7		6		0		0		0		0		6		7		0		0		7		9		24		4		2		0			0		3			0		0		10		6		0		0
0		3		0		0		0		0		0		0		10		0		6		10		30		5		2		0			0		3			0		0		2		0		0		0
0		5		0		0		0		2		0		4		0		0		3		7		29		8		2		0			0		2			0		0		7		0		0		85
0		6		1		1		2		0		0		1		0		0		3		7		24		4		2		0			0		4			10		0		5		0		0		0
6		8		0		3		0		0		0		1		4		0		0		6		29		7		1		0			0		3			5		0		5		16		0		0
4		6		0		7		0		6		0		8		0		0		0		12		28		6		2		0			0		5			10		0		3		6		0		0
4		7		0		0		0		5		0		7		0		0		4		7		32		7		4		0			0		4			0		0		4		0		0		0
9		2		0		0		0		7		0		3		5		0		3		7		20		6		2		0			0		4			0		0		0		0		6		0
5		7		0		0		0		8		6		8		11		0		4		9		22		4		1		0			15		4			0		0		9		0		0		99
7		8		0		1		0		2		0		6		0		0		1		4		29		7		2		0			0		3			0		6		8		10		0		83
3		5		0		0		0		6		0		3		4		0		9		7		25		8		2		0			0		5			0		7		6		0		0		92
9		11		0		0		0		0		0		6		5		0		0		9		27		4		3		0			0		4			0		0		6		0		0		105
6		3		0		0		0		6		0		8		0		0		6		7		30		8		2		0			5		4			0		0		3		0		0		0
6		5		0		0		0		3		6		9		0		5		3		10		29		8		1		0			0		5			0		0		9		0		0		0
12		2		0		0		0		5		0		4		0		0		10		10		27		5		2		0			0		4			0		4		6		10		0		0
4		6		3		0		5		5		8		6		7		0		0		10		27		6		3		0			0		3			0		8		6		0		0		0
4		3		0		3		5		0		0		7		3		0		4		9		29		6		2		0			0		7			0		0		7		0		6		0
4		10		0		0		0		4		0		0		0		0		3		7		25		6		3		0			13		4			0		6		8		6		0		74
3		6		0		0		0		5		5		5		6		0		2		10		24		3		2		0			0		3			0		0		3		10		6		0
3		5		0		0		0		0		0		1		0		0		3		7		28		4		3		0			15		5			0		0		4		10		0		78
5		4		0		0		0		5		10		0		0		0		0		7		26		6		2		0			0		4			0		5		2		6		0		0
0		0		0		5		0		0		0		6		4		0		9		5		24		5		2		0			0		5			0		0		6		0		0		0
7		3		0		6		0		5		8		5		0		0		0		6		27		4		3		0			0		1			6		0		6		0		0		100
11		4		0		2		0		5		5		0		0		0		3		9		30		4		3		0			0		6			16		0		4		0		0		0
4		6		0		0		0		7		0		2		0		0		0		10		24		5		2		0			0		3			0		0		4		0		0		0
7		6		0		0		0		8		0		6		6		0		8		8		25		7		2		0			0		6			6		7		4		0		0		0
9		7		0		0		0		1		3		0		0		0		8		5		25		7		2		0			14		4			0		9		4		0		0		77
7		6		1		4		0		0		0		4		4		0		6		9		20		5		4		0			0		4			10		8		5		0		0		0
10		6		0		0		0		9		0		3		0		0		6		6		23		4		2		0			0		5			0		0		3		6		6		90
0		5		0		0		5		11		0		9		9		0		0		12		28		8		4		0			16		6			5		7		11		0		0		20
0		5		0		0		0		6		9		0		0		0		6		8		29		7		2		0			0		3			0		0		4		10		0		0
4		2		0		0		0		8		0		2		0		0		0		9		26		6		1		0			0		2			0		0		9		0		0		88
4		6		0		1		0		0		0		6		4		0		4		10		29		6		2		0			16		3			0		0		3		0		0		0
4		7		0		2		0		2		0		2		6		0		7		10		25		7		1		0			0		3			0		0		0		10		0		0
4		8		4		0		0		0		0		5		8		0		8		11		26		5		3		0			0		2			0		0		7		6		0		71
3		3		0		2		0		0		6		2		10		0		4		9		27		4		3		0			0		2			0		5		4		6		0		0
7		6		0		0		0		0		0		7		0		0		1		5		25		7		3		0			0		1			10		6		4		6		0		0
0		0		7		0		0		6		0		4		7		0		8		7		24		5		3		0			0		5			6		2		6		0		0		92
3		4		0		0		0		0		0		4		0		0		10		8		24		6		1		0			0		5			0		0		4		6		10		70
6		0		0		2		0		0		0		5		0		0		9		7		26		3		2		0			26		4			0		10		7		10		10		0
0		9		0		0		0		5		0		4		13		0		4		9		25		9		4		0			3		4			0		0		1		0		0		86
9		7		0		4		0		2		0		0		11		0		2		4		27		5		2		0			15		3			0		0		3		6		0		88
2		7		0		0		0		4		7		0		0		0		8		7		25		5		3		0			0		5			10		11		2		10		0		89
5		5		0		0		0		5		0		9		4		0		0		8		27		3		1		0			0		3			10		0		8		0		0		0
5		7		0		0		5		0		0		1		0		0		0		7		30		4		1		0			10		5			0		3		4		10		0		0
6		4		0		0		0		2		0		5		0		0		6		5		27		6		2		0			0		4			0		0		1		16		6		85
3		4		0		0		0		0		0		0		4		0		3		7		24		6		1		0			14		3			0		5		8		0		0		0
0		3		0		0		0		4		0		7		0		0		5		11		25		4		2		0			0		4			0		4		7		0		0		87
4		4		0		0		0		9		4		7		0		0		0		7		19		5		2		0			0		5			10		0		8		0		0		0
10		7		0		0		0		6		0		1		5		0		2		6		23		4		3		0			0		3			10		8		3		0		10		0
6		6		0		0		0		6		0		0		0		0		5		7		20		6		2		0			5		3			0		0		3		0		0		99
0		4		0		0		0		0		0		10		0		0		8		2		29		6		3		0			6		4			0		3		4		16		0		0
10		4		0		5		0		4		0		5		0		7		9		10		24		6		2		0			0		4			0		0		4		0		6		0
6		8		0		2		0		0		0		0		6		0		6		11		27		2		2		0			6		6			0		0		0		0		0		0
1		6		0		2		0		5		0		0		0		0		2		5		23		6		3		0			6		5			10		0		0		10		0		0
0		8		0		0		0		4		0		4		0		0		5		9		21		3		3		0			0		5			16		0		4		16		0		0
3		5		0		0		0		4		4		6		4		0		6		7		24		8		1		0			0		2			0		0		9		10		0		0
3		6		0		2		0		3		0		7		0		0		9		5		28		5		2		0			0		6			6		4		0		10		0		85
2		0		0		1		0		0		0		3		5		0		4		10		26		4		2		0			0		4			6		0		3		0		0		0
7		2		0		0		0		7		2		6		0		0		6		9		22		5		2		0			0		2			0		0		1		0		0		0
4		4		0		0		0		1		5		9		0		0		9		3		25		6		4		0			0		1			10		0		5		10		0		0
1		3		5		3		0		0		0		5		4		0		3		8		25		3		3		0			0		4			0		8		1		0		0		77
0		6		0		0		0		0		0		7		0		0		6		10		29		5		2		0			0		3			0		0		9		0		0		0
0		3		4		6		0		7		6		0		0		0		4		10		26		7		1		0			14		0			0		0		6		5		5		0
10		9		0		0		0		0		0		6		0		0		0		8		24		4		3		0			12		3			0		7		4		0		6		74
4		8		4		0		0		5		6		3		0		0		7		11		23		6		2		0			4		6			0		2		9		10		0		0
0		6		0		0		0		0		10		4		0		0		7		5		26		2		3		0			0		5			0		5		9		10		0		85
9		11		0		0		0		5		0		8		10		0		9		6		25		6		1		0			0		5			0		0		9		6		6		95
5		2		0		0		0		4		0		4		9		0		6		5		30		4		2		0			5		7			0		0		6		6		0		89
2		7		0		0		0		7		0		0		0		0		10		13		22		6		2		0			0		4			0		6		5		0		0		0
0		6		0		2		0		10		0		6		0		0		8		8		25		5		2		0			0		7			0		4		2		10		0		0
10		4		0		0		0		0		6		4		0		0		7		7		26		8		3		0			0		4			10		1		7		6		0		0
5		6		0		0		0		0		0		0		0		0		0		3		17		5		2		0			15		3			0		0		7		0		0		66
7		5		0		0		0		4		0		6		0		0		2		8		27		6		4		0			0		3			0		1		4		10		5		0
0		7		1		2		0		8		0		11		0		0		6		6		25		5		0		0			5		6			6		0		6		6		0		0
10		13		0		1		0		12		0		8		0		0		2		10		22		5		1		0			0		4			5		9		8		0		0		0
2		3		0		0		0		7		5		11		9		0		9		11		28		5		0		0			0		6			10		0		3		0		0		82
8		3		0		0		0		0		0		10		3		0		0		10		24		5		2		0			0		3			0		8		6		0		6		0
7		0		0		0		0		4		0		13		0		0		0		7		24		6		1		0			3		4			6		0		9		0		16		0
5		5		0		0		0		4		5		2		5		0		10		7		26		4		2		0			26		3			5		0		6		0		0		0
0		3		0		0		0		3		0		6		6		0		3		11		30		3		2		0			0		6			0		0		4		6		0		84
8		8		0		0		0		8		0		7		0		0		4		8		26		6		1		0			23		2			0		0		4		0		0		102
6		4		0		0		0		6		0		0		0		0		7		12		26		8		4		0			4		5			6		6		2		0		10		95
9		8		0		0		0		0		7		6		0		0		9		7		23		3		3		0			6		5			0		0		0		6		16		0
0		6		0		0		0		5		0		5		0		0		0		7		29		3		3		0			14		3			0		5		4		10		0		0
0		8		0		0		0		0		0		6		0		0		6		11		26		6		3		0			0		5			16		2		3		10		0		86
1		4		0		0		0		3		0		4		0		0		0		7		29		6		1		0			0		4			0		0		7		5		0		0
8		6		0		3		0		0		0		5		5		0		5		6		26		7		3		0			0		4			0		0		0		0		0		0
2		9		0		0		0		8		0		6		0		0		6		9		22		4		3		0			0		4			5		0		4		10		0		0
0		7		0		0		0		3		0		10		7		0		5		6		26		4		2		0			0		4			0		0		5		6		0		87
0		5		0		0		0		0		0		5		0		0		0		6		26		7		1		0			0		3			0		6		2		0		0		0
5		8		0		2		0		3		0		5		9		0		7		7		28		9		1		0			0		5			0		4		0		6		16		0
6		9		5		2		0		12		8		0		0		0		11		11		23		6		1		0			31		2			10		0		12		6		0		0
7		8		0		0		0		9		0		0		5		0		0		9		24		5		2		0			15		3			0		8		2		0		0		70
10		6		0		0		0		0		0		2		10		0		4		11		24		7		2		0			0		4			6		0		6		0		0		36
4		2		3		0		0		0		5		0		0		0		7		10		26		2		2		0			0		4			0		0		4		0		0		89
1		5		6		0		0		10		0		6		0		0		8		11		24		6		2		0			0		5			10		0		3		6		0		0
9		4		0		6		0		7		6		6		6		0		0		7		22		5		1		0			0		2			0		0		7		0		0		81
0		7		0		3		0		0		0		8		6		0		5		11		23		5		2		0			0		4			0		0		10		0		6		90
3		4		0		0		0		0		0		4		4		0		5		8		21		4		4		0			3		3			0		9		1		0		0		0
4		8		0		0		0		8		6		6		0		0		4		9		21		5		2		0			0		4			0		0		10		0		0		93
3		6		0		0		0		0		0		7		0		0		7		10		17		5		0		0			0		4			0		0		7		0		0		84
0		2		1		0		0		3		0		6		0		0		0		13		21		6		4		0			0		5			0		6		7		10		5		0
7		7		0		0		0		0		0		4		0		0		10		6		23		4		2		0			34		4			0		0		1		0		0		90
5		7		0		3		0		0		0		0		5		0		5		9		28		4		3		0			0		5			0		0		4		10		10		0
4		5		0		0		0		0		3		0		0		0		0		6		22		4		3		0			9		4			6		6		5		5		10		0
4		5		0		0		0		4		0		7		0		0		1		8		31		6		2		0			5		3			10		4		6		0		0		0
5		6		0		0		0		8		0		0		0		0		5		8		25		5		1		0			15		4			0		0		7		0		0		80
3		5		0		1		0		7		0		11		0		0		7		8		25		7		4		0			0		6			0		4		4		0		0		0
8		11		0		0		0		7		0		4		0		0		8		4		24		5		4		0			0		6			0		2		4		10		10		0
8		9		0		0		0		6		0		5		7		0		7		9		25		8		2		0			32		5			0		0		0		0		0		0
7		6		0		0		0		5		0		3		0		0		0		7		21		8		1		0			0		3			0		0		3		6		0		106
5		7		0		2		2		0		0		4		0		0		3		10		24		5		3		0			0		4			0		7		2		10		0		0
3		8		0		0		0		6		0		0		0		0		0		4		22		5		2		0			14		4			0		0		8		10		10		0
5		8		0		0		0		0		0		5		6		0		7		7		24		6		3		0			25		6			0		0		2		0		0		0
7		5		0		0		0		4		0		2		8		0		6		7		14		8		2		0			5		4			0		0		3		6		0		0
4		9		0		0		0		6		5		8		7		0		0		5		25		5		4		0			0		4			0		0		4		6		0		96
0		3		0		0		6		4		3		8		4		0		3		9		26		3		2		0			0		4			0		0		7		10		0		0
4		6		0		0		0		3		0		7		0		0		11		8		27		5		2		0			0		4			10		5		3		0		0		72
7		7		0		0		5		8		0		8		4		0		6		6		22		6		1		0			0		3			0		8		0		10		0		0
6		7		0		0		0		0		0		5		6		0		9		7		26		6		2		0			0		4			0		6		5		0		5		0
5		2		0		6		0		0		0		0		4		0		0		7		27		4		1		0			19		4			0		0		4		6		0		0
6		4		0		0		0		6		0		4		0		0		2		6		26		4		2		0			0		5			0		0		7		0		0		0
2		3		0		0		0		0		0		5		0		0		0		9		31		5		3		0			0		6			6		0		3		5		10		0
4		5		0		2		0		6		0		3		3		0		0		7		23		5		3		0			5		5			6		0		2		0		0		0
9		5		11		0		0		1		0		0		6		0		8		9		26		6		2		0			0		4			0		0		8		6		10		0
4		4		7		0		0		0		0		6		9		0		6		8		21		8		3		0			6		6			10		0		7		6		0		0
4		8		0		0		0		2		0		11		0		0		4		9		23		5		2		0			0		3			0		1		4		10		0		0
0		5		0		0		0		8		0		9		7		0		3		10		28		5		1		0			0		3			6		8		6		6		0		80
11		7		0		0		0		5		0		5		8		0		5		6		25		7		1		0			0		3			0		0		0		0		6		0
0		5		0		0		0		4		4		4		0		0		5		5		27		6		1		0			4		6			0		0		7		0		0		79
3		6		6		3		0		1		0		4		0		0		0		7		23		9		2		0			6		6			6		0		6		0		0		0
5		5		0		5		0		2		0		3		6		0		4		7		28		6		1		0			0		6			0		0		5		0		0		0
0		10		0		0		0		7		0		4		4		0		7		7		24		6		1		0			0		3			0		0		0		0		0		58
5		7		0		0		3		0		6		0		0		0		7		8		28		5		1		0			0		3			0		0		3		6		0		0
0		6		0		0		0		7		4		0		0		0		6		7		32		6		4		0			15		5			0		0		8		10		0		0
0		7		0		0		0		3		0		6		0		0		3		6		22		7		3		0			6		3			0		3		7		0		6		0
4		4		9		0		0		7		0		4		0		0		5		8		23		6		1		0			4		4			0		4		8		0		0		94
4		6		0		0		0		8		4		3		7		0		4		9		25		4		3		0			0		1			0		12		2		0		0		0
11		7		4		0		0		2		0		1		10		0		2		7		22		4		4		0			0		6			0		0		5		10		6		0
0		4		0		0		0		10		0		0		0		0		8		9		34		3		4		0			5		0			0		6		11		6		0		43
3		3		0		0		0		7		0		2		0		0		5		8		26		6		1		0			0		6			6		0		3		10		10		0
10		8		0		3		0		4		7		6		0		4		6		8		21		7		2		0			25		4			0		5		6		10		0		0
0		9		0		0		0		1		6		7		0		0		5		11		26		4		1		0			6		5			10		0		0		10		6		0
4		3		0		0		0		9		4		9		0		0		16		7		27		5		4		0			5		3			0		0		9		10		0		0
12		10		0		0		0		8		9		5		0		0		3		8		20		4		4		0			0		5			10		11		7		0		0		0
8		3		0		0		0		3		3		3		0		0		3		9		30		9		2		0			0		4			0		0		4		0		0		0
8		4		0		0		0		7		0		6		0		0		1		8		15		3		2		0			0		4			0		6		6		6		0		0
0		7		0		6		0		0		0		3		8		0		6		8		19		5		1		0			0		2			0		10		3		0		0		0
5		6		0		0		0		0		10		11		0		0		0		11		24		4		1		0			0		7			0		0		7		0		0		71
5		5		0		0		0		4		0		5		0		0		5		8		23		7		2		0			0		6			0		0		0		0		0		0
6		5		0		5		0		3		0		0		0		0		4		8		23		5		3		0			0		4			0		0		6		6		0		80
8		8		0		0		0		2		0		0		6		0		6		10		22		5		1		0			0		4			16		0		8		5		0		85
0		6		0		2		0		0		0		10		2		0		8		7		22		4		2		0			5		5			0		7		0		0		0		0
2		3		0		5		0		0		0		8		0		0		2		9		31		5		3		0			0		5			0		0		6		5		10		81
5		5		0		0		0		0		0		0		0		0		0		5		24		6		1		0			26		4			6		0		11		10		5		107
0		10		0		0		0		6		0		0		0		0		11		9		25		4		0		0			4		4			0		0		8		16		0		105
5		4		0		0		0		0		8		9		0		0		2		5		26		5		2		0			0		4			0		7		4		5		6		0
5		6		0		1		0		0		0		9		0		0		5		6		17		8		3		0			15		2			10		5		10		6		6		0
3		6		0		0		0		9		0		13		0		0		0		9		24		5		2		0			3		4			10		0		7		0		0		84
0		5		0		0		2		0		0		4		0		0		1		6		25		2		3		0			0		5			0		0		5		10		10		80
5		7		0		0		0		0		0		3		6		0		0		3		21		8		3		0			25		5			0		0		9		0		10		0
11		5		1		0		0		2		0		5		0		0		6		3		24		5		2		0			5		6			0		0		10		10		0		0
0		4		0		0		0		0		0		4		0		0		2		11		21		3		1		0			0		4			16		0		4		0		0		97
8		3		0		3		0		6		0		0		6		0		8		9		29		5		0		0			6		7			0		9		4		0		0		75
0		6		0		0		0		2		0		10		0		0		4		7		27		6		3		0			0		4			6		7		5		6		0		0
5		3		0		0		0		9		0		2		0		0		0		13		23		7		1		0			0		4			0		9		8		6		0		0
2		8		0		2		0		0		0		8		8		0		4		5		19		5		4		0			0		2			10		0		7		0		0		0
5		8		0		0		0		0		0		4		0		0		2		11		32		8		2		0			0		1			0		0		6		10		0		0
4		7		0		0		0		0		0		7		0		0		10		11		22		4		1		0			0		4			0		4		7		16		0		86
8		3		0		0		0		0		0		7		0		0		0		9		20		4		2		0			0		4			0		7		3		0		0		0
1		8		0		0		1		7		0		7		0		0		2		6		25		7		2		0			4		3			0		2		7		0		10		0
0		9		0		0		0		13		0		5		0		0		7		3		27		7		1		0			4		7			0		0		5		0		0		79
2		10		0		6		0		0		0		0		0		0		9		7		29		3		1		0			0		3			0		9		10		10		10		0
8		3		6		1		0		0		0		0		0		0		8		11		17		5		2		0			5		4			0		5		0		0		0		0
7		5		0		0		0		6		7		3		7		0		2		11		30		4		2		0			0		2			0		2		8		0		0		0
6		4		9		0		0		13		5		3		7		0		9		10		26		3		2		0			0		6			16		4		5		10		0		75
3		4		0		0		0		9		0		0		0		0		5		6		29		5		1		0			0		4			0		0		4		6		0		0
5		4		0		3		0		3		0		6		8		0		0		10		25		5		2		0			0		4			0		0		6		6		0		0
6		6		0		0		0		3		3		0		0		0		2		9		27		4		2		0			0		2			0		0		10		0		10		84
7		3		0		0		0		3		0		6		5		0		6		7		26		4		3		0			6		7			0		0		2		0		10		0
5		7		0		0		0		14		0		6		1		0		8		10		30		5		2		0			14		3			5		0		6		0		0		0
6		4		0		0		0		0		0		0		0		0		6		7		25		6		2		0			5		3			0		0		6		0		0		82
3		5		0		0		0		2		5		9		0		0		3		8		28		8		2		0			6		4			0		3		4		5		0		92
5		4		0		0		0		7		6		9		5		0		6		5		21		7		1		0			0		3			0		7		6		0		0		86
0		14		0		0		0		6		0		7		0		0		4		7		17		4		1		0			14		4			10		4		0		0		0		76
4		4		7		0		0		7		0		6		6		0		2		9		23		4		3		0			26		5			0		6		9		0		0		0
5		5		0		0		0		3		0		5		0		0		0		8		23		7		3		0			0		3			10		0		6		0		0		0
5		6		0		0		0		0		0		0		0		0		4		9		28		4		2		2			0		0			6		7		1		16		0		0
0		8		0		5		0		7		0		1		4		0		2		8		21		5		3		0			23		3			0		5		2		6		0		0
0		4		0		4		0		5		0		8		0		0		8		9		24		5		1		0			0		3			0		0		5		0		0		0
9		9		0		0		0		0		0		0		5		0		12		10		26		3		2		0			6		0			0		0		8		0		0		0
8		5		0		0		0		5		0		5		0		0		3		10		23		5		1		0			0		5			5		0		7		0		6		0
8		2		0		0		0		8		9		0		7		0		5		8		30		3		4		0			4		5			0		7		8		6		5		0
0		5		0		0		0		0		5		6		0		0		4		12		28		6		1		0			28		3			6		0		4		0		0		0
8		5		3		0		0		9		0		4		0		0		5		8		26		8		2		0			0		3			0		0		1		0		0		0
7		7		0		0		0		11		0		6		0		0		0		8		27		5		3		0			0		4			16		0		5		5		0		86
2		8		0		3		0		3		0		4		8		0		5		6		23		4		2		0			0		3			0		0		4		0		0		79
5		7		0		3		0		4		11		8		0		0		7		10		24		6		1		0			0		3			0		0		3		0		0		0
0		5		0		0		0		6		2		7		3		0		0		6		29		5		4		0			0		5			0		5		4		0		10		0
6		6		0		0		0		4		0		0		8		0		7		5		25		4		2		0			16		6			0		0		10		0		0		0
8		4		0		0		0		10		0		6		0		0		6		6		23		7		2		0			24		6			0		0		9		10		6		104
0		6		0		0		0		0		0		8		0		0		4		7		27		4		4		0			12		5			0		1		10		6		6		82
8		1		0		0		0		6		3		4		0		0		8		10		32		4		0		0			16		5			0		0		8		16		0		0
7		8		0		5		0		0		0		0		0		0		11		11		22		2		2		0			0		3			10		3		1		6		0		0
6		2		0		0		4		4		0		0		2		0		0		6		25		4		1		0			0		5			0		7		3		0		0		109
1		7		0		0		0		0		4		7		0		0		0		8		24		4		2		0			14		2			0		0		4		0		0		0
1		7		0		0		0		5		0		0		0		0		5		10		31		8		2		0			0		3			0		0		3		10		0		81
0		4		0		0		0		0		8		3		0		0		5		9		20		4		4		0			0		5			0		0		6		5		0		0
6		2		4		0		0		4		0		6		4		0		12		9		24		6		2		0			5		5			0		0		5		0		0		87
4		3		0		0		0		6		0		3		0		0		14		8		31		4		2		0			0		3			6		0		0		0		10		95
10		7		0		0		0		4		0		0		7		0		3		6		24		6		2		0			15		5			0		0		3		10		0		80
8		8		0		0		0		1		0		0		0		0		10		8		25		6		3		0			0		3			0		0		5		0		0		69
5		3		0		5		0		0		0		9		7		0		0		6		25		5		0		0			24		4			0		7		8		6		0		85
6		4		0		0		0		0		6		7		7		0		0		7		23		3		1		0			23		8			0		4		6		0		0		0
5		11		0		3		0		0		0		3		0		0		4		11		27		6		2		0			16		4			0		0		3		6		10		0
13		6		0		0		0		8		0		7		3		0		8		9		23		7		0		0			22		2			0		0		4		0		10		78
0		1		0		3		4		4		8		4		0		0		10		11		28		4		3		0			14		3			10		0		5		10		6		0
0		0		0		0		0		8		9		9		6		0		9		8		21		3		3		0			5		4			0		7		9		10		10		0
4		4		0		0		0		2		0		2		7		0		6		10		26		4		2		0			13		4			0		0		3		5		0		0
6		6		0		0		0		0		0		0		7		0		0		7		21		8		2		0			0		5			0		5		0		10		0		0
3		10		0		0		0		5		0		6		6		0		7		11		28		7		2		0			0		4			0		2		6		10		0		0
0		5		0		0		3		7		0		10		0		0		5		6		27		7		3		0			0		1			0		0		9		0		0		0
8		4		0		4		0		6		0		5		0		0		10		7		27		6		2		0			0		5			0		0		3		0		6		0
0		4		0		0		0		0		0		6		0		0		3		9		26		5		2		0			26		4			10		6		4		0		0		84
5		5		0		4		0		7		9		5		0		0		2		9		22		5		2		0			0		5			0		0		1		0		0		0
6		3		0		0		0		6		0		6		3		0		0		9		27		6		4		0			0		6			6		0		5		0		0		0
4		11		0		7		0		11		3		0		0		0		3		6		25		7		2		0			0		4			0		7		8		6		16		78
9		12		0		0		0		0		0		1		0		0		7		8		25		5		2		0			17		6			0		0		5		0		0		84
4		4		0		0		0		5		3		6		0		0		10		5		24		4		0		0			13		5			0		0		1		10		0		0
6		4		0		0		0		6		0		9		0		0		6		7		20		7		4		0			0		1			0		0		6		16		0		0
7		6		0		0		0		7		0		3		10		0		4		7		27		8		1		0			0		4			0		0		3		0		0		0
1		11		0		0		7		7		0		5		0		0		0		10		25		3		3		0			0		2			10		8		5		0		0		0
0		8		0		0		0		1		0		4		0		0		8		7		25		3		2		0			0		5			10		5		6		10		6		0
8		3		0		0		0		0		5		7		5		0		4		12		21		1		1		0			4		5			0		0		9		10		0		101
3		5		0		0		0		4		2		2		0		0		7		7		26		4		3		0			0		4			0		3		9		0		0		113
4		4		0		0		0		0		0		2		0		0		3		5		26		7		1		0			0		3			16		5		9		6		0		101
0		8		0		0		0		4		5		5		0		0		5		10		28		4		1		0			26		4			0		7		3		0		0		0
4		5		0		0		0		0		0		2		3		0		7		5		24		5		2		0			0		5			10		6		5		0		6		0
0		3		0		0		2		0		0		5		5		0		4		7		20		5		1		0			8		4			0		4		0		0		0		83
6		6		0		0		0		6		6		8		0		0		0		7		24		5		3		0			0		2			0		0		3		10		0		98
0		3		0		1		0		0		0		3		0		0		7		7		26		5		2		0			0		5			0		3		0		0		0		96
8		8		0		4		0		0		0		8		0		0		6		6		32		5		4		0			5		3			0		0		7		10		16		0
7		5		0		0		0		7		0		4		8		0		6		4		26		6		3		0			13		6			0		0		9		10		0		87
6		6		0		5		0		5		0		3		3		0		0		12		21		6		3		0			0		5			0		0		3		0		0		0
5		7		0		0		0		2		0		7		0		0		4		10		27		4		2		0			0		3			0		0		11		5		0		0
4		4		0		0		0		0		6		5		5		0		5		6		27		4		2		1			0		2			0		0		2		10		0		0
4		5		0		0		0		7		0		8		5		0		1		11		23		3		2		0			0		6			0		0		0		0		0		85
5		3		3		0		0		3		6		6		0		0		4		8		21		4		2		0			6		4			0		0		4		6		0		0
0		8		0		0		0		4		7		0		0		0		0		6		27		4		2		0			0		2			6		5		2		0		10		78
8		9		1		3		0		7		0		10		6		0		5		4		26		6		3		0			15		5			6		0		7		0		0		0
6		6		0		0		0		9		6		0		0		0		1		7		28		6		4		1			0		5			0		7		0		0		0		88
10		5		0		3		0		5		0		7		0		0		9		9		23		3		2		0			0		5			0		0		4		0		6		89
3		8		0		6		0		0		0		7		0		0		5		9		23		5		1		0			5		2			0		0		3		10		0		96
4		2		0		0		2		0		0		7		0		0		4		6		32		5		1		0			0		3			0		6		6		0		0		0
0		4		0		0		0		6		0		0		4		0		3		7		26		2		3		0			0		5			0		0		3		0		10		0
0		9		0		0		0		0		0		0		0		0		4		7		27		4		1		0			5		3			6		3		6		0		0		90
9		4		4		0		0		4		0		0		0		0		0		9		31		3		3		0			0		7			0		0		8		0		0		84
0		11		0		0		0		0		0		6		4		0		0		8		20		5		3		0			0		4			0		0		0		10		0		0
5		4		2		0		0		7		6		0		10		0		5		10		23		7		2		0			0		6			6		5		3		6		0		111
0		6		0		0		0		6		0		12		0		0		7		6		26		4		2		0			0		3			0		7		8		0		0		0
7		3		0		1		0		0		0		5		3		0		4		10		29		6		2		0			0		3			0		0		8		6		6		0
9		6		0		0		0		5		0		0		6		0		9		9		26		3		1		0			3		5			6		0		3		0		0		0
2		8		0		0		3		4		7		8		5		0		9		6		29		3		1		0			0		4			0		2		5		0		10		85
2		5		1		5		0		5		0		7		4		0		4		8		28		6		4		0			15		4			0		6		3		0		0		0
0		5		0		1		0		0		0		6		0		0		6		6		27		6		3		0			0		5			0		0		4		6		0		92
8		6		0		3		0		8		0		0		0		0		2		5		22		6		2		0			0		1			6		0		2		0		10		72
0		3		0		5		0		2		0		5		0		0		1		6		27		3		2		0			15		4			0		0		4		0		0		0
0		5		0		0		0		7		0		4		0		0		5		9		24		6		2		0			0		2			0		0		3		0		10		0
7		8		0		0		0		4		0		5		3		0		6		8		29		5		2		0			5		4			0		0		8		10		16		85
8		0		0		0		0		5		8		2		0		0		0		9		22		5		3		0			21		7			0		8		11		0		0		80
0		4		0		0		0		8		0		8		5		0		3		5		23		5		3		0			0		3			0		0		6		0		0		97
5		11		0		0		0		7		0		0		0		0		0		7		25		5		3		0			0		7			0		0		7		0		6		0
2		7		0		5		0		6		0		7		0		0		9		8		26		4		1		0			13		7			6		0		7		0		0		0
0		13		0		0		1		8		0		1		0		0		0		10		26		6		2		0			6		5			0		0		6		16		0		0
6		2		0		0		0		7		0		0		0		0		4		7		25		6		2		0			0		7			0		0		3		0		0		63
10		5		0		4		0		0		0		4		0		0		0		5		32		4		2		0			0		3			5		0		9		0		0		0
5		4		0		0		0		0		0		0		3		0		0		5		22		4		1		0			0		5			0		2		3		0		6		0
0		0		0		0		0		3		0		4		10		0		8		10		28		4		2		0			5		2			0		4		5		0		0		0
6		0		0		0		0		3		0		0		0		0		9		13		26		3		1		0			0		2			10		0		6		0		6		0
5		5		0		5		0		0		0		9		2		0		2		7		24		6		1		0			4		4			0		0		6		0		0		0
2		9		9		0		0		3		10		8		0		0		2		6		23		5		2		0			0		1			0		0		4		5		0		0
0		7		0		0		0		0		0		3		2		0		8		8		22		5		2		0			0		6			0		7		10		0		0		0
0		6		0		0		0		9		0		5		0		0		8		7		19		5		2		0			5		3			0		0		4		6		0		0
5		4		0		0		5		6		0		0		0		0		6		7		21		3		2		0			0		2			0		0		5		0		0		0
7		4		7		0		0		0		0		0		0		0		4		8		22		3		3		0			0		7			0		0		4		0		0		0
13		3		0		0		0		5		6		3		0		0		6		5		23		8		3		0			15		3			10		0		6		0		0		84
11		3		0		0		0		4		0		0		1		0		7		7		23		8		3		0			0		4			6		5		13		6		0		0
0		4		0		0		0		5		3		7		0		0		6		9		24		7		2		0			0		4			6		0		8		0		0		0
9		5		0		0		0		0		0		6		4		0		0		7		31		6		1		0			0		2			10		0		2		0		0		0
7		10		0		4		0		10		0		3		0		0		0		10		22		6		3		0			0		3			5		0		10		0		0		84
0		3		0		0		0		3		7		8		0		0		6		12		21		6		2		0			0		3			0		7		5		10		0		0
5		4		5		0		0		0		0		5		3		0		8		9		25		4		3		0			4		3			0		0		2		0		0		0
2		4		0		0		0		1		0		2		0		3		10		11		23		4		3		0			0		5			0		7		7		10		10		92
2		9		0		0		0		0		0		10		8		0		2		9		31		4		1		0			22		6			6		0		5		6		0		0
6		7		0		2		0		0		0		8		0		0		0		11		29		5		2		0			0		3			0		6		6		10		0		0
0		4		0		0		0		9		7		8		3		0		4		9		21		7		3		0			0		5			0		0		6		0		0		85
1		4		0		5		0		0		2		6		0		0		7		5		23		3		1		0			0		1			0		0		9		0		0		0
0		6		0		0		0		6		0		0		0		0		0		9		30		6		1		0			6		2			6		0		4		0		0		0
12		5		0		0		0		0		0		6		0		0		6		9		29		1		2		0			10		3			6		5		6		0		0		0
7		5		0		4		0		8		11		3		6		0		8		8		30		6		2		0			0		2			5		4		4		0		0		0
3		3		0		0		0		0		0		8		0		0		3		7		20		3		2		0			0		4			10		3		5		0		0		96
4		6		10		2		0		0		0		4		0		0		5		7		24		5		3		0			0		3			0		0		7		10		0		64
6		6		0		7		0		5		0		0		4		0		8		11		24		3		3		0			6		1			0		0		1		10		0		102
0		3		0		1		0		10		8		9		0		0		3		11		23		4		1		0			0		3			0		2		2		6		0		0
6		5		0		0		0		3		0		0		0		0		3		7		23		6		2		0			0		4			0		0		7		10		0		0
0		2		0		7		0		5		0		0		0		0		2		9		26		3		3		0			0		4			0		0		3		0		0		0
0		7		0		5		0		0		0		0		5		0		3		7		28		5		2		0			0		6			10		0		0		0		0		93
4		9		0		0		0		4		0		6		0		0		7		6		24		7		1		0			0		4			0		3		10		10		10		88
9		9		0		1		0		5		0		3		7		0		5		8		27		3		1		0			18		4			0		4		1		10		10		0
3		5		0		0		0		7		0		8		0		0		3		5		26		7		2		0			25		4			10		0		5		0		0		0
5		8		0		0		0		6		7		5		0		0		5		9		24		6		3		0			5		2			0		0		8		10		0		0
7		5		0		0		0		7		0		6		0		0		3		12		22		5		0		0			5		5			5		5		4		0		0		63
4		4		0		0		3		0		0		5		4		0		5		9		19		6		3		0			0		4			0		4		9		0		10		0
3		4		0		0		0		0		0		6		0		0		0		10		26		7		3		0			13		4			16		0		2		10		5		0
5		5		0		4		0		3		0		5		5		0		7		10		20		3		1		0			34		4			0		0		1		0		0		0
0		6		0		4		0		5		0		6		0		3		6		8		25		6		2		0			0		6			0		5		6		0		0		76
7		6		0		0		0		6		0		3		0		0		7		8		25		6		1		0			0		5			0		0		6		5		0		0
7		7		0		0		0		0		0		0		0		0		3		9		31		4		2		0			0		4			0		5		5		0		0		0
9		7		0		0		0		0		0		9		0		0		0		8		26		5		3		0			6		4			6		0		6		0		6		0
0		12		0		2		0		0		3		7		0		0		2		5		20		6		1		0			26		5			0		3		3		0		0		0
8		5		0		0		0		0		0		4		0		0		1		7		16		5		2		0			10		5			0		3		3		10		0		0
2		5		0		0		1		9		5		4		0		0		4		11		24		8		2		0			0		4			0		13		4		0		0		0
7		7		5		0		0		8		0		6		0		0		4		8		20		7		3		0			0		3			0		6		0		10		0		0
5		4		0		0		4		7		6		5		0		0		8		8		26		6		3		0			4		4			0		10		2		0		0		0
7		4		0		0		0		6		0		0		10		0		3		6		33		4		2		0			0		3			0		5		9		10		6		0
2		5		0		0		0		0		0		4		0		6		4		6		23		7		3		0			3		2			0		9		2		0		0		0
5		8		0		0		0		9		8		4		9		0		8		9		25		7		3		0			0		5			0		0		8		6		0		0
4		8		0		0		0		7		0		7		0		0		6		5		31		2		2		0			0		5			0		0		10		0		10		0
10		9		0		0		0		3		0		0		0		0		2		9		21		4		3		0			6		1			6		0		4		5		0		0
1		6		0		4		0		7		2		4		0		0		0		6		27		7		2		0			6		2			10		0		9		0		10		69
6		2		0		0		0		7		0		4		7		0		3		11		25		6		3		0			6		4			0		0		3		16		0		0
8		9		0		0		0		0		8		13		0		0		9		8		24		3		1		0			14		4			6		7		4		6		0		72
0		4		0		0		0		0		2		4		0		0		8		5		29		5		3		0			0		4			0		6		6		6		0		0
0		4		0		0		0		0		0		5		6		0		0		8		23		7		1		0			0		3			0		7		4		6		0		75
7		7		0		0		0		0		0		7		0		0		10		6		22		6		2		0			0		7			0		0		3		0		0		0
6		3		0		0		0		0		9		0		0		0		4		9		30		5		1		0			0		6			0		6		2		0		10		0
6		5		0		1		0		5		0		0		5		0		10		8		21		8		2		0			11		6			0		6		6		0		0		69
3		8		0		0		3		0		0		6		7		0		5		10		22		5		3		0			13		4			6		0		4		0		0		0
7		4		0		0		0		6		0		5		7		0		3		8		19		5		1		0			0		4			0		2		5		6		6		0
1		3		0		0		0		4		0		4		0		0		0		6		28		5		3		0			9		4			0		0		8		0		0		0
3		7		0		5		1		7		0		3		5		0		0		7		23		6		3		0			0		3			0		0		3		6		0		0
0		7		0		0		0		11		4		2		0		7		6		8		20		3		2		0			0		2			0		3		4		10		0		69
7		4		0		0		0		1		0		5		6		0		6		7		28		4		0		0			0		4			0		0		6		0		0		0
0		4		0		5		0		7		6		4		4		0		7		5		27		3		1		0			6		4			10		0		3		0		0		90
3		6		0		0		0		9		0		5		0		0		0		9		26		6		1		0			0		5			0		0		8		10		0		0
7		5		6		0		0		0		3		7		8		0		7		11		28		5		1		0			0		4			0		3		4		10		0		92
8		11		0		0		0		2		4		0		0		0		4		7		23		4		2		0			0		6			0		8		4		10		0		0
0		6		0		0		0		3		0		4		0		0		0		11		22		5		2		0			0		4			0		5		0		0		0		81
1		6		0		0		1		7		0		0		0		0		3		8		29		8		2		0			0		4			0		0		1		0		0		0
0		5		0		0		0		4		0		0		0		0		6		9		27		5		2		0			13		4			0		5		7		0		10		93
4		3		0		5		0		3		0		3		0		0		3		7		26		4		1		0			5		5			0		3		11		6		0		77
8		4		0		3		0		6		0		4		0		0		6		6		27		5		3		0			0		1			0		4		7		0		10		0
10		5		0		4		1		7		0		8		0		0		8		8		24		4		3		0			15		4			0		0		6		0		0		67
5		3		0		0		0		0		0		3		0		0		3		9		29		1		3		0			0		3			0		3		0		6		0		0
5		3		0		0		0		5		0		6		0		0		0		6		25		5		2		0			14		6			0		0		0		0		0		0
0		1		0		0		0		0		0		0		12		0		7		10		18		3		2		0			0		2			0		5		3		10		0		0
3		6		0		0		0		0		7		5		9		0		3		9		24		7		1		0			14		3			0		6		5		0		0		80
3		3		0		0		0		6		8		5		0		0		0		7		26		6		1		0			0		5			0		3		4		0		0		0
5		1		0		0		0		0		0		8		0		0		7		9		34		5		3		0			0		5			0		7		2		10		6		0
6		2		0		0		0		6		0		2		0		0		2		11		25		7		2		0			15		5			0		0		5		0		0		81
0		3		0		6		0		4		0		2		5		0		8		6		20		4		4		0			0		4			6		0		8		0		0		88
4		7		0		0		0		2		0		5		0		0		0		7		28		3		2		0			5		3			5		5		6		6		0		77
4		5		0		0		2		11		0		0		5		0		0		5		19		8		2		0			15		5			10		0		6		0		0		0
0		5		0		0		0		6		6		6		0		0		3		8		25		6		1		0			0		2			0		4		4		0		0		0
2		3		0		0		0		7		0		6		0		0		4		6		26		5		2		0			3		3			0		0		2		10		0		0
8		6		0		0		0		5		0		3		0		0		5		7		29		5		0		0			6		4			0		7		5		0		0		0
2		9		0		0		0		0		5		7		0		0		12		7		24		1		0		0			14		3			10		0		0		10		0		0
3		9		0		0		0		0		8		3		1		0		8		5		27		5		2		0			0		4			0		0		7		0		0		78
0		7		0		0		0		7		0		0		0		0		0		10		27		8		1		0			0		7			0		6		2		10		0		91
4		2		0		0		0		0		0		7		0		0		1		5		25		4		2		0			0		5			0		6		7		0		0		0
0		8		0		0		0		4		4		8		0		0		6		9		23		6		2		0			0		5			0		7		6		0		0		0
7		4		0		0		3		7		0		11		0		0		5		9		22		7		2		0			0		4			0		0		9		6		0		81
3		5		4		5		0		5		0		8		4		0		6		8		25		6		3		0			6		4			0		0		7		0		0		0
8		5		0		3		0		0		0		5		0		0		8		7		29		3		2		0			0		4			0		2		5		0		0		0
0		3		0		0		0		6		0		9		6		0		7		5		30		5		2		0			5		4			0		0		9		6		0		0
6		10		0		1		0		3		0		0		0		0		10		10		25		8		4		0			0		2			0		0		0		0		0		88
1		5		0		0		0		8		0		0		11		0		5		8		20		3		3		1			0		4			0		0		5		6		0		75
6		3		0		0		0		7		0		6		6		0		7		7		21		2		2		0			0		6			0		10		0		0		0		83
5		11		0		0		0		0		7		4		0		0		3		8		29		4		2		0			0		3			6		0		10		0		0		85
8		3		5		0		0		10		0		6		5		0		0		12		26		3		3		0			0		5			0		0		5		0		0		83
6		3		0		0		0		0		0		0		0		0		0		9		25		6		3		0			0		4			10		0		5		0		0		95
3		4		0		0		0		3		5		7		6		0		8		7		19		3		0		0			5		3			0		0		9		0		16		80
10		5		0		2		0		3		0		0		0		0		0		6		27		6		3		0			15		2			0		0		3		0		0		0
3		6		3		0		0		3		0		7		7		0		5		6		27		6		2		0			16		3			0		0		6		10		0		0
0		7		0		0		0		0		5		0		6		0		9		12		28		4		0		0			0		3			0		0		2		0		0		0
3		6		0		0		0		5		0		6		0		0		3		9		25		4		3		0			0		3			0		0		4		0		6		0
8		10		6		4		0		0		4		4		0		0		7		8		20		5		2		0			5		3			0		7		5		6		0		0
1		4		0		0		2		5		0		3		0		0		6		11		20		4		2		0			0		3			0		0		7		6		0		82
0		8		0		5		0		6		0		5		6		0		4		11		24		6		2		0			9		2			0		5		5		10		10		0
6		5		0		0		5		0		0		5		6		0		3		9		22		5		2		0			7		3			0		8		3		0		0		0
5		4		0		0		0		1		5		6		0		0		10		8		30		5		3		0			0		3			0		3		0		0		0		0
0		7		0		3		3		0		0		0		0		0		7		6		24		7		2		0			0		6			0		0		8		0		0		78
2		5		0		6		0		7		0		3		0		0		9		7		22		2		3		0			19		4			10		0		4		0		0		81
0		0		0		0		0		6		3		13		0		0		9		7		25		6		2		0			0		4			0		2		5		0		0		0
0		10		0		0		0		1		0		0		0		0		12		9		24		6		3		0			0		2			10		0		5		0		0		0
5		10		0		0		0		1		0		7		5		0		11		6		27		5		1		0			0		6			0		7		4		0		0		0
0		8		1		0		0		0		4		9		0		0		5		10		24		6		1		0			5		3			10		0		5		16		5		99
3		8		0		0		0		9		0		7		2		0		4		8		27		3		2		0			4		4			0		0		1		0		0		0
4		9		0		0		0		6		5		4		0		0		6		8		21		4		2		0			0		3			10		7		4		0		6		0
11		4		0		0		0		0		0		0		0		0		5		7		27		3		3		0			26		4			0		3		5		10		0		0
7		3		0		0		0		0		0		5		0		0		0		5		26		5		2		0			0		3			0		5		9		10		0		84
5		0		0		0		0		10		0		6		11		0		3		8		24		5		1		0			0		3			0		14		3		0		6		0
6		4		0		0		0		0		0		3		11		0		2		9		31		6		3		0			26		2			0		0		6		6		6		0
2		5		0		0		0		0		0		5		4		0		12		5		29		5		2		0			6		4			0		2		6		0		0		0
9		8		0		0		0		4		0		0		0		0		9		9		31		4		1		0			0		3			0		4		2		6		0		75
4		3		0		0		0		5		0		5		0		0		9		7		22		7		2		0			0		2			0		0		4		6		0		0
6		5		0		0		0		5		4		6		7		0		8		4		23		6		3		0			0		4			10		0		1		16		0		0
0		8		0		0		0		12		0		4		0		0		4		7		28		5		3		0			6		6			0		11		5		10		0		0
7		9		0		0		0		10		3		10		0		0		0		6		20		4		2		0			0		4			0		0		0		0		0		0
4		7		0		0		0		2		0		4		0		0		0		12		23		3		1		0			15		2			6		5		6		0		0		0
0		5		0		0		0		7		0		5		3		0		0		6		29		7		4		0			9		8			0		0		6		0		0		0
0		0		1		0		0		6		0		1		0		0		4		8		23		5		2		0			0		5			0		9		7		10		0		0
6		6		0		7		0		0		0		0		0		0		0		7		28		3		1		0			0		3			0		0		0		0		10		0
8		8		0		0		0		6		0		6		3		0		11		10		26		6		2		0			5		2			10		0		8		0		0		0
6		4		0		0		0		5		0		7		0		0		0		8		26		6		3		0			19		5			0		6		0		10		0		73
9		7		0		0		0		10		0		4		0		0		5		6		21		5		2		0			6		5			0		0		4		0		6		0
0		5		0		0		0		7		0		0		7		0		3		3		23		5		3		0			5		3			0		0		3		0		0		105
4		5		0		0		0		0		0		8		0		0		3		5		19		5		3		0			0		3			6		9		7		0		6		0
0		4		0		4		0		6		0		2		7		0		6		6		25		7		3		0			4		2			0		0		4		0		0		0
0		10		0		0		0		11		0		3		0		0		7		7		22		5		1		2			0		5			0		0		7		0		6		0
2		5		0		0		0		5		5		6		0		0		9		8		23		6		2		0			14		5			10		7		6		6		0		0
3		7		0		2		0		0		0		2		0		0		4		7		23		4		3		0			0		6			0		0		7		6		0		101
0		4		0		4		0		6		0		10		10		0		8		7		26		10		2		0			0		2			6		6		9		0		0		0
9		8		0		0		0		1		2		6		5		0		6		12		28		4		2		0			14		5			0		0		5		0		0		0
4		8		0		0		0		7		5		5		7		0		2		11		26		7		3		0			0		3			0		0		6		0		6		0
0		5		0		0		0		7		0		7		1		0		0		8		25		6		1		0			5		6			0		0		5		0		0		0
4		9		0		0		0		7		0		6		0		0		4		7		28		3		0		0			0		5			6		6		4		10		0		0
7		7		0		0		0		0		0		2		0		0		4		10		24		6		1		0			0		3			0		0		4		10		0		0
3		10		0		0		0		4		0		2		0		0		5		10		25		4		3		0			0		1			0		0		6		0		0		0
2		7		0		0		0		6		0		4		0		0		3		9		22		5		2		0			0		3			0		5		0		0		6		0
3		4		0		0		0		0		0		1		0		5		2		14		22		5		2		0			15		5			6		6		6		0		0		0
3		5		0		0		0		7		0		6		0		0		7		8		30		4		1		0			0		4			0		9		7		0		6		0
0		9		0		3		0		5		8		3		4		0		3		6		22		2		2		0			25		5			6		7		2		6		0		0
7		3		0		3		0		6		0		0		5		0		3		10		25		7		2		0			0		6			0		6		4		0		0		98
10		9		0		0		0		6		9		7		0		0		5		10		26		4		1		0			32		3			0		0		11		0		0		0
9		8		0		0		0		4		0		5		0		0		5		8		24		3		2		0			14		5			0		0		9		6		0		0
8		5		0		0		0		3		0		4		0		0		6		7		22		6		2		0			5		5			0		11		4		0		0		0
2		4		0		0		0		6		0		0		0		0		5		10		26		5		2		0			0		5			0		0		6		6		16		73
7		6		0		0		0		9		0		4		4		0		2		9		21		4		3		0			25		2			5		0		2		10		0		0
2		4		0		4		0		6		0		4		0		0		0		8		24		8		2		0			0		3			6		0		9		0		0		0
7		7		0		6		0		10		0		8		0		0		0		8		24		5		1		0			0		5			0		0		4		0		0		0
6		11		0		0		0		5		10		6		0		0		8		6		23		5		3		0			0		3			0		0		11		0		6		0
0		6		4		0		0		10		0		0		0		0		6		10		27		7		1		0			23		6			0		0		10		10		0		0
6		3		0		0		0		7		0		4		0		0		5		8		24		5		1		0			0		2			0		0		3		0		0		0
0		5		0		0		0		0		0		0		0		0		6		6		20		6		2		0			0		8			10		6		5		16		16		68
2		7		0		0		0		0		0		7		0		0		6		7		24		5		1		0			24		5			0		5		6		0		0		85
6		7		0		0		0		5		0		4		0		0		5		9		21		4		2		0			0		3			0		2		2		0		0		79
0		6		0		0		0		4		4		0		0		0		0		6		27		4		3		0			0		3			0		0		7		0		0		78
7		0		0		0		0		7		8		0		0		0		6		10		23		4		2		0			0		7			0		5		4		0		6		67
1		6		0		3		0		8		7		8		0		0		3		9		27		6		0		0			5		5			0		0		7		6		0		51
4		9		0		0		0		5		0		11		0		0		0		9		22		6		2		0			0		1			0		0		6		10		0		0
7		8		4		3		0		0		0		6		0		0		5		6		24		5		3		0			0		3			16		0		10		10		0		0
3		2		2		0		0		3		0		4		0		0		9		9		27		6		2		0			0		3			0		6		3		0		0		0
0		2		0		0		0		3		0		14		5		0		5		8		23		2		1		0			0		5			5		0		2		0		16		0
9		10		0		0		0		0		0		7		8		0		1		9		22		6		3		0			13		2			10		0		4		0		6		102
0		6		0		0		0		9		7		0		0		0		0		8		32		5		1		0			4		7			0		0		4		5		0		0
0		4		0		0		0		12		3		0		0		0		5		8		20		8		3		0			0		5			0		0		9		10		0		0
0		10		0		2		0		0		5		4		8		0		0		8		25		4		3		0			5		3			0		0		2		0		0		0
11		2		0		0		0		12		5		4		0		0		0		9		27		4		2		0			0		4			10		0		1		0		0		0
5		5		0		2		0		6		4		4		0		0		0		12		21		5		1		0			9		4			0		7		4		6		10		86
2		6		0		0		0		3		4		7		0		0		5		9		21		4		3		0			16		6			0		0		6		0		6		75
10		3		0		0		0		6		0		5		4		0		1		6		25		6		1		0			23		4			0		0		8		0		5		87
7		3		0		0		0		0		0		12		0		0		7		7		20		4		0		0			12		4			0		0		4		10		10		78
3		6		0		0		0		6		0		5		0		0		3		8		19		7		2		0			25		5			0		5		6		0		0		0
0		8		0		0		0		0		8		0		7		0		9		6		23		4		2		0			0		5			0		3		7		0		0		87
3		7		0		0		0		0		0		10		0		0		0		6		27		5		3		0			0		4			0		0		6		0		0		0
9		5		0		5		0		0		0		7		0		0		8		7		17		5		4		0			0		3			0		0		5		0		6		0
6		9		0		0		0		9		0		3		9		0		5		8		21		6		1		0			13		4			16		4		8		10		6		0
0		9		0		0		0		2		0		0		7		0		9		8		25		7		1		0			6		4			0		0		9		0		0		81
0		7		0		0		1		0		0		3		0		0		6		10		24		4		3		0			0		4			16		0		6		0		0		0
6		3		0		0		0		0		7		7		0		0		0		7		24		5		3		0			0		3			0		5		8		0		6		0
0		10		0		0		0		9		9		4		10		0		6		7		21		5		2		0			5		3			0		5		5		6		0		0
9		8		0		0		0		8		0		4		4		0		13		7		24		5		1		0			0		4			0		0		5		10		0		78
5		9		0		0		0		5		0		4		5		0		8		4		22		5		3		0			6		6			0		0		10		0		0		0
0		2		0		0		0		9		0		3		0		0		3		8		24		7		2		0			0		5			16		0		9		0		0		0
4		7		0		0		0		7		5		11		0		0		0		8		26		3		2		0			0		5			0		5		1		0		0		99
9		6		0		0		0		8		9		3		0		0		3		3		27		7		2		0			0		5			10		0		0		0		6		81
4		7		0		6		0		6		0		5		5		6		6		5		21		3		0		0			23		4			0		7		6		0		0		0
6		9		0		0		0		0		0		7		1		0		2		7		27		4		2		0			0		6			0		2		4		0		0		89
11		6		0		0		1		4		0		7		0		0		6		9		17		6		2		0			0		5			0		0		6		0		5		0
8		6		0		0		0		0		0		5		0		0		4		5		24		2		1		0			5		4			0		0		7		0		0		0
6		5		0		1		0		4		0		8		9		0		5		9		31		3		2		0			0		2			0		0		5		6		0		80
5		9		0		3		0		9		0		5		4		0		0		9		24		7		3		0			0		4			16		0		5		0		0		84
6		0		0		0		2		5		0		8		2		0		3		7		23		5		2		0			0		5			0		6		8		6		0		85
5		4		8		0		0		4		0		2		6		0		2		4		26		4		1		0			0		1			0		11		5		6		6		78
6		7		0		0		0		7		0		0		9		0		8		7		21		5		3		0			34		3			0		12		5		0		0		75
5		5		0		1		0		9		0		3		7		0		5		8		13		4		2		0			0		2			0		0		5		0		0		0
6		3		0		0		0		0		0		3		0		0		3		8		20		10		2		0			0		7			0		0		6		0		0		0
7		7		1		0		0		0		0		3		0		0		4		10		29		5		1		0			0		4			0		0		8		0		0		0
4		7		0		1		0		4		0		5		0		0		0		10		27		5		1		0			0		5			0		0		7		0		0		99
2		7		0		0		0		5		4		7		0		0		6		10		27		5		3		0			9		3			0		0		4		0		0		0
6		5		0		0		0		6		0		7		0		0		3		8		26		7		2		0			0		3			0		0		3		0		0		74
7		4		0		0		0		6		0		4		0		0		3		10		26		4		3		0			0		6			0		5		4		0		6		63
3		5		0		0		0		11		0		2		0		0		6		6		23		6		2		0			12		5			6		5		3		0		0		85
0		3		0		3		0		0		0		3		8		0		7		9		26		6		1		0			0		2			10		0		9		10		0		0
4		5		0		0		0		0		0		3		0		0		5		8		28		4		2		0			0		5			0		0		3		0		16		0
0		6		0		0		0		7		0		5		0		0		0		7		27		2		2		0			13		7			0		4		3		0		0		85
8		10		0		0		0		0		0		0		10		0		3		9		30		4		1		0			0		3			10		6		9		10		0		0
9		5		13		0		0		5		5		0		0		0		6		9		25		3		0		0			0		2			0		0		4		10		10		91
5		5		0		0		0		5		0		4		5		0		11		8		24		4		1		0			15		4			0		0		7		16		10		0
6		4		0		4		0		0		0		5		0		0		3		12		20		4		3		0			8		2			0		6		5		0		0		0
11		4		0		0		0		0		0		8		0		0		0		7		26		5		2		0			0		4			10		0		3		0		0		0
0		6		0		0		0		2		0		6		14		0		5		11		26		5		1		0			0		4			0		0		4		0		0		0
7		7		0		0		0		4		6		10		0		0		6		6		22		6		4		0			0		2			6		3		2		10		6		91
0		4		0		3		0		0		8		2		0		0		8		7		25		7		1		0			4		5			0		0		5		6		0		0
3		6		0		3		0		3		0		6		0		0		0		13		26		4		4		0			0		4			0		0		7		6		0		0
7		2		0		0		0		3		0		2		0		0		2		8		26		2		4		0			0		4			0		0		5		0		5		0
6		6		0		3		0		0		7		0		0		0		5		9		25		4		4		0			25		3			0		4		2		6		6		0
0		11		0		4		0		8		0		6		0		0		4		12		31		6		3		0			15		5			0		0		10		0		0		0
0		6		0		0		0		6		3		5		0		0		6		9		22		3		1		0			0		4			0		0		4		0		0		90
10		11		0		0		0		0		0		8		0		4		6		8		22		4		1		0			0		2			0		3		6		6		0		110
10		8		0		0		0		10		0		5		5		0		3		10		21		8		1		0			0		3			10		0		2		0		0		85
6		8		0		0		0		0		7		8		0		0		5		9		34		5		3		0			13		5			0		6		6		10		10		0
0		5		0		0		0		3		1		0		0		0		6		7		29		4		2		0			5		4			0		0		6		0		10		0
5		5		0		0		0		5		0		6		0		0		8		9		18		3		3		0			15		4			0		0		2		10		10		0
0		7		0		0		0		5		6		0		0		0		3		10		24		5		3		0			4		5			0		0		4		0		0		0
5		5		0		0		0		0		6		0		8		0		2		8		29		7		3		0			5		5			0		0		1		0		0		0
4		7		0		0		0		10		0		10		0		0		7		12		25		7		2		0			0		5			5		2		2		10		16		0
7		6		0		0		0		0		8		5		0		0		5		7		23		6		2		0			24		3			0		3		6		6		0		0
7		9		0		3		0		4		0		0		0		0		6		8		28		5		2		0			0		5			0		0		0		10		0		0
5		9		0		2		0		3		2		6		0		0		0		10		30		7		4		0			0		6			0		7		7		0		0		0
0		4		0		3		0		5		0		4		0		0		5		7		24		6		2		0			0		2			0		0		5		0		0		0
5		4		0		1		0		5		0		3		5		0		2		9		25		2		2		0			0		8			0		0		5		6		0		70
7		7		0		6		2		6		7		0		0		0		5		7		22		4		2		0			0		3			0		0		11		0		0		0
0		5		0		0		0		6		0		8		6		0		1		6		23		5		3		0			0		3			16		2		0		0		0		0
3		6		0		0		0		7		0		7		0		0		0		6		24		2		0		0			0		4			0		0		8		0		0		0
1		7		0		0		0		6		4		2		1		0		1		8		23		5		2		0			0		4			0		11		4		6		0		56
2		8		0		0		0		4		0		5		0		0		10		9		28		3		3		0			0		4			0		0		2		5		0		0
8		4		0		0		0		3		0		0		0		0		3		5		23		6		3		0			0		3			0		6		2		0		0		0
6		5		0		0		0		6		0		2		0		0		8		8		24		6		3		0			0		3			0		0		6		0		9		85
4		5		0		0		0		0		0		8		1		0		4		7		28		4		1		0			12		6			0		7		0		0		10		0
8		6		0		0		0		5		9		4		0		0		7		5		21		4		1		0			5		5			0		0		5		0		0		101
6		6		0		0		0		0		1		4		0		0		5		8		26		3		3		0			0		3			0		0		4		0		0		0
10		6		0		0		0		4		0		4		8		0		0		5		25		4		2		0			0		4			0		0		1		0		0		0
2		3		0		0		0		0		0		11		0		0		0		9		28		6		2		0			15		1			10		1		5		0		0		113
6		3		0		0		0		3		4		3		0		0		6		6		18		4		3		0			0		3			0		2		6		10		0		93
0		6		0		2		0		4		0		7		0		0		4		11		26		2		3		0			0		6			10		0		5		10		16		0
5		4		0		0		0		0		0		3		6		0		6		3		20		7		2		0			23		2			6		4		0		6		0		0
3		8		0		0		0		0		7		0		3		0		5		9		22		4		2		0			0		3			0		4		7		0		0		0
0		7		0		4		0		3		0		4		9		0		6		9		27		6		3		0			5		4			0		0		0		10		0		0
0		11		0		0		0		4		0		5		0		0		7		8		22		6		3		0			0		4			0		4		8		6		0		0
7		10		0		0		0		9		0		8		0		0		5		9		28		3		1		0			0		4			0		0		3		0		6		82
6		8		0		0		3		0		0		5		7		0		4		6		27		4		1		0			33		4			0		0		7		10		10		0
5		8		0		0		0		0		0		13		0		0		7		5		23		6		1		0			5		5			0		4		11		6		10		41
10		1		0		0		0		0		8		3		7		0		4		11		23		3		3		0			5		4			0		6		8		10		0		86
0		8		0		0		0		0		0		0		4		0		4		7		27		1		1		0			4		3			0		0		7		0		6		0
6		7		0		0		0		5		0		9		6		0		0		9		32		6		0		0			5		4			0		0		6		6		0		0
6		5		0		0		0		7		5		11		0		0		6		10		20		7		2		0			0		7			6		3		5		10		0		90
0		3		0		5		0		0		0		0		7		0		0		10		21		7		2		0			0		4			0		4		1		0		0		0
2		2		0		0		0		5		0		12		0		0		0		8		27		3		3		0			9		2			0		0		2		0		10		15
4		5		0		0		7		1		0		9		0		0		2		8		22		7		3		0			5		5			6		0		4		0		0		72
7		3		0		0		0		5		6		3		2		0		0		11		22		5		2		0			0		4			10		5		3		0		0		0
4		14		4		4		0		5		5		0		5		0		0		8		22		4		0		0			15		4			0		2		1		0		0		26
6		7		6		0		0		0		0		4		0		0		6		7		20		5		1		0			0		4			0		0		5		5		0		0
3		5		0		6		0		0		0		6		0		0		1		11		25		5		0		0			0		5			0		3		7		0		0		0
0		1		0		0		0		0		5		6		0		0		5		9		22		6		1		0			4		3			0		0		0		0		0		0
0		11		0		4		4		9		0		0		0		0		3		8		30		4		4		0			0		5			6		0		1		0		0		79
2		3		0		0		0		5		0		8		4		0		0		13		26		5		1		0			6		5			0		0		9		0		0		95
0		8		0		0		0		0		0		6		5		0		3		7		28		1		2		0			5		4			0		5		6		16		0		0
4		2		0		2		0		0		9		5		7		0		4		5		27		5		0		0			4		2			0		0		1		10		5		125
5		6		0		0		0		6		0		5		8		0		2		6		26		4		2		0			31		4			0		0		10		0		0		111
0		10		0		0		0		0		0		9		0		0		0		8		27		7		2		0			0		6			0		0		8		0		0		0
4		5		0		0		0		0		0		7		0		0		4		8		30		6		4		0			0		2			0		8		3		0		5		87
0		2		0		0		0		7		0		0		7		0		7		10		23		6		1		0			13		3			0		0		4		0		0		0
5		8		0		0		0		4		0		0		6		0		0		7		19		6		2		0			0		3			6		7		13		5		0		87
1		3		0		0		0		6		0		6		0		0		0		6		29		8		4		0			0		6			0		0		5		0		6		74
6		6		0		0		0		0		8		5		5		0		5		7		24		5		2		0			5		2			10		4		7		0		5		0
6		7		0		0		0		4		6		4		0		0		8		7		20		2		3		0			7		2			0		3		6		6		0		0
7		4		8		0		0		0		0		3		5		0		0		9		31		5		1		0			16		5			0		8		6		10		0		0
8		2		2		1		0		0		0		8		4		0		2		6		32		1		2		0			0		4			0		9		7		5		0		78
10		7		0		0		0		0		7		5		0		0		9		8		23		4		4		0			0		5			0		0		3		10		10		0
4		3		0		0		0		8		0		3		1		0		3		8		28		9		2		0			15		4			0		6		3		6		0		0
0		13		0		0		0		0		0		6		9		0		5		7		25		7		1		0			6		5			0		0		8		10		16		69
4		2		0		0		0		0		0		3		0		0		2		8		28		4		2		0			14		2			0		0		5		5		0		100
9		3		0		0		0		0		7		11		0		0		0		2		27		6		1		0			0		2			0		0		7		0		0		0
8		9		0		4		0		5		4		0		0		0		2		9		24		2		3		0			0		8			6		0		9		0		0		0
9		7		0		0		3		0		0		7		4		0		0		11		28		4		0		0			0		2			5		8		5		0		0		0
6		8		0		0		0		0		0		10		0		0		0		8		23		4		3		0			25		3			10		0		4		0		0		94
3		10		0		1		0		6		0		1		0		0		8		7		23		3		1		0			0		8			0		1		6		0		0		98
5		5		0		5		0		12		0		5		5		0		4		4		26		8		3		0			0		5			0		0		5		6		0		0
6		0		0		5		0		10		7		4		0		0		4		8		29		6		1		0			0		3			0		0		2		0		0		0
5		6		3		6		0		7		5		7		10		0		6		9		22		6		2		0			0		6			0		5		4		0		0		0
0		2		0		0		0		5		0		3		1		0		6		7		27		6		3		0			0		1			10		0		7		10		0		0
0		5		0		0		0		5		0		7		4		0		6		9		25		8		3		0			0		5			0		0		0		10		10		0
3		2		0		0		0		5		0		7		0		0		0		6		17		3		2		0			10		4			0		0		0		0		0		0
2		5		0		0		0		5		6		11		5		0		0		9		29		5		2		0			0		5			0		0		3		0		0		0
4		6		0		0		0		3		0		6		0		0		6		6		25		5		0		0			36		4			6		0		7		6		0		68
5		4		0		0		0		0		0		0		0		0		0		8		19		8		0		1			16		5			0		0		4		0		16		0
8		8		0		0		0		0		0		0		0		0		3		11		32		2		3		0			17		6			0		0		8		0		6		0
6		8		0		2		0		0		0		9		0		0		0		8		23		7		3		0			14		2			0		0		6		6		0		74
0		5		0		3		0		0		0		4		0		0		0		9		27		7		1		0			0		4			0		0		5		0		0		88
2		6		0		0		0		0		5		7		4		0		0		9		26		5		1		0			15		5			0		0		2		0		0		84
6		0		0		0		0		0		6		0		0		0		0		10		25		5		1		0			0		3			0		2		0		10		0		66
5		7		0		5		0		4		5		5		0		0		5		9		24		0		2		0			0		3			6		2		4		0		0		0
5		2		0		3		0		0		0		13		8		0		3		8		25		4		3		0			0		3			6		0		9		0		0		0
0		8		0		0		5		5		6		6		2		0		0		7		30		5		1		0			0		5			0		0		6		0		10		0
8		4		0		1		0		0		0		10		0		0		6		10		19		8		0		0			5		5			6		8		0		5		0		82
3		6		0		0		0		7		0		6		0		0		8		8		29		5		2		0			4		5			0		0		5		0		0		98
1		6		3		0		3		0		0		0		4		0		5		5		25		4		1		0			0		1			0		0		0		0		0		104
6		3		0		0		0		0		5		1		0		0		0		10		26		4		1		0			0		4			0		0		9		0		10		0
7		4		0		0		0		7		0		10		0		0		3		5		27		6		2		0			14		4			0		5		6		10		10		0
10		0		0		0		0		3		0		4		1		0		5		7		28		4		2		0			13		5			0		8		10		0		0		0
5		6		0		5		0		6		0		6		5		0		3		6		29		4		1		0			0		4			0		2		6		0		0		0
3		2		0		0		0		3		0		0		4		0		8		10		19		4		3		0			10		4			0		0		8		6		0		0
6		5		0		0		0		3		10		0		10		0		6		8		30		5		2		0			0		4			0		0		4		0		0		0
0		6		0		0		0		7		0		0		0		0		5		11		26		8		1		0			0		6			10		0		2		6		0		0
3		9		3		0		0		0		0		10		0		0		2		8		26		5		1		0			0		3			0		0		4		10		0		4
1		7		3		0		0		5		0		6		0		0		0		5		21		6		4		0			0		3			0		7		7		10		5		0
5		4		0		0		4		0		0		8		1		0		4		5		21		7		2		0			4		4			0		0		4		0		0		0
3		8		0		0		0		0		2		8		0		0		10		6		28		6		1		0			0		3			16		5		7		0		10		98
6		5		0		0		0		9		3		0		0		0		3		10		29		6		1		0			5		4			0		0		1		0		6		73
2		4		2		0		0		0		0		2		5		0		7		8		26		5		1		0			15		6			10		4		8		6		6		0
12		8		0		0		0		6		5		10		0		0		6		9		24		8		2		0			14		6			0		0		6		6		0		0
0		6		4		0		0		4		0		4		8		0		0		8		24		5		2		0			0		5			0		5		6		0		6		0
0		6		0		0		0		8		0		5		0		0		9		10		23		4		2		0			5		4			0		6		10		10		0		0
8		7		0		2		0		0		0		3		0		0		1		6		26		9		1		0			0		6			0		0		7		0		6		82
2		4		0		2		0		0		0		6		0		0		1		9		23		5		1		0			4		4			0		0		1		10		0		0
4		5		0		8		0		0		0		0		0		0		0		7		24		5		2		0			0		5			0		0		0		0		0		0
6		3		0		0		0		4		0		0		0		0		3		7		26		5		2		0			0		4			0		9		7		5		0		90
7		8		0		0		0		0		2		0		9		0		6		11		27		6		1		0			0		4			0		6		1		6		0		111
6		6		0		3		0		11		0		4		0		0		6		11		29		5		3		0			10		2			0		3		6		0		0		0
1		5		0		6		0		8		0		8		4		0		2		10		27		8		0		0			0		4			0		0		3		10		6		79
7		0		0		0		0		0		9		9		1		0		0		8		23		6		4		0			7		2			0		0		5		10		0		0
6		6		0		0		0		0		9		7		0		0		4		12		31		3		1		0			0		5			0		0		3		0		0		81
0		5		0		0		0		0		8		0		7		0		4		5		22		4		3		0			0		3			0		0		6		6		0		82
5		10		0		0		0		8		0		10		0		0		3		6		21		7		0		0			0		6			0		0		4		0		0		92
4		8		0		5		0		0		0		3		0		0		5		8		29		4		1		0			0		3			6		4		6		6		0		94
4		7		0		0		0		5		0		0		7		0		0		9		23		5		1		0			0		5			0		5		0		0		0		0
3		6		0		0		0		0		0		4		0		0		0		6		18		3		3		0			0		4			5		0		5		0		0		0
9		8		0		6		0		9		0		4		0		0		0		8		24		5		2		0			0		3			0		0		5		0		0		96
0		3		0		4		0		0		6		6		8		0		4		10		21		3		1		0			0		5			0		0		4		0		6		80
2		4		0		0		0		0		0		4		0		0		0		7		22		3		2		0			21		3			0		0		5		0		0		79
4		5		0		7		0		5		0		0		0		0		3		10		22		6		3		0			0		4			0		0		1		10		0		91
5		3		0		0		0		0		8		3		0		0		5		7		26		6		0		0			0		5			0		0		6		16		0		0
6		6		0		0		0		3		0		9		0		0		0		4		25		4		1		0			0		1			0		0		6		0		0		89
9		4		0		3		0		0		3		3		5		0		0		8		26		5		2		0			9		3			16		0		6		10		0		0
7		3		0		0		1		7		0		8		0		0		11		11		30		6		2		0			0		5			0		0		9		0		0		0
0		4		0		3		0		0		0		9		6		0		3		6		24		5		2		0			0		5			0		9		6		0		0		0
5		4		0		0		0		5		0		7		0		0		2		11		24		3		0		0			0		6			0		0		8		10		0		83
5		8		0		0		0		8		0		5		0		0		0		10		29		3		0		0			0		2			10		0		0		0		0		0
6		9		0		0		0		0		0		4		6		0		9		12		19		5		2		0			0		3			0		10		5		10		0		0
5		3		0		0		0		9		4		7		0		0		0		8		21		6		0		0			0		4			0		0		5		10		0		77
9		5		0		0		0		4		0		12		4		0		9		9		23		3		0		0			5		5			0		0		2		6		0		0
3		9		0		5		0		7		5		3		8		0		5		8		19		3		3		0			0		5			0		6		8		0		0		0
2		3		0		1		0		11		6		9		0		0		3		7		21		8		4		0			0		3			10		0		3		6		0		0
8		7		0		0		0		0		4		7		5		0		0		9		23		5		2		0			6		3			0		0		3		0		0		84
5		6		0		0		0		0		0		0		0		0		3		9		26		6		1		0			0		1			0		4		3		10		6		0
4		3		0		0		0		3		0		1		3		0		0		10		25		4		1		0			15		3			0		0		0		10		6		0
5		8		0		0		0		2		6		4		6		0		4		9		29		6		1		0			18		5			0		0		5		0		6		0
0		3		0		0		0		4		0		6		0		0		3		6		29		4		2		0			4		3			0		0		3		10		6		76
0		5		0		0		0		0		7		2		10		0		2		7		23		5		1		0			5		2			10		0		2		10		0		0
9		3		0		0		0		10		0		9		0		0		7		9		24		6		3		0			0		5			0		6		8		0		0		0
6		0		0		1		0		3		0		6		0		0		0		5		23		5		3		0			15		3			6		0		4		10		6		0
6		10		0		1		0		0		7		4		0		0		12		8		30		3		3		0			33		4			0		0		5		0		0		0
4		3		0		0		0		0		4		0		0		0		10		9		24		3		1		0			13		5			0		0		4		6		0		85
6		3		0		0		0		8		7		9		0		0		3		9		30		7		1		0			0		6			10		4		7		10		0		92
0		0		3		0		0		0		0		6		1		0		0		13		27		5		1		0			0		5			0		0		2		0		0		0
3		6		0		0		0		2		0		0		0		0		0		12		20		5		1		0			0		6			0		0		3		0		0		0
8		4		0		2		0		10		0		0		0		0		4		5		23		6		1		0			0		1			5		4		4		10		6		0
4		11		0		0		0		3		0		7		0		0		6		11		21		5		1		0			4		1			6		5		5		6		0		0
6		4		0		0		0		0		0		0		0		0		5		10		22		5		2		0			0		6			6		5		4		0		0		0
0		6		0		6		5		6		0		6		0		0		0		8		25		2		1		0			0		3			0		5		4		0		0		0
3		3		8		0		0		0		0		6		0		0		0		12		23		4		2		0			0		6			0		1		7		10		0		0
4		6		0		0		1		6		0		0		0		0		0		10		28		4		3		0			0		6			0		0		6		0		0		77
1		7		0		0		0		0		0		6		0		0		5		8		23		3		2		0			0		5			0		0		1		0		10		0
5		8		0		0		0		5		0		4		0		0		10		9		24		6		0		0			5		7			0		0		5		0		16		46
5		8		0		0		0		0		0		2		0		0		7		9		20		3		3		0			24		7			0		9		8		0		0		0
8		5		0		0		0		6		0		5		5		0		4		11		27		5		2		0			0		4			0		0		3		0		5		0
6		5		0		0		0		6		0		6		0		0		6		6		29		4		2		0			5		8			0		1		4		0		0		89
6		5		6		0		0		5		0		6		0		0		0		6		25		5		0		0			13		3			0		0		4		6		10		0
3		2		1		0		0		0		8		0		0		0		4		9		26		5		1		0			8		3			0		0		6		0		0		0
0		4		0		0		0		3		3		5		0		0		5		9		25		3		0		0			6		3			0		14		0		0		0		0
3		7		0		0		0		0		0		0		0		0		3		4		23		6		2		0			0		4			16		3		2		16		10		0
4		2		0		3		0		5		0		5		0		0		5		6		23		4		3		0			15		4			0		0		6		6		0		84
8		7		0		0		0		3		0		7		4		0		3		11		24		5		2		0			0		4			5		0		8		0		0		0
1		2		0		0		0		0		3		0		0		0		6		9		19		6		3		0			0		5			0		0		8		6		0		0
0		10		3		0		0		4		0		10		0		0		0		5		25		4		3		0			0		5			0		8		9		0		0		0
5		5		0		0		0		0		2		6		0		0		2		4		21		3		3		0			0		3			0		0		3		0		10		99
1		10		0		3		0		0		0		5		0		0		0		9		22		7		2		0			5		4			0		0		1		0		10		0
2		10		0		0		0		5		4		6		0		0		10		8		26		6		2		0			22		5			10		4		0		0		0		0
6		5		0		0		0		0		0		11		0		0		10		12		22		3		3		0			0		3			0		6		9		6		0		78
7		11		3		4		0		3		0		0		0		0		6		10		24		6		1		0			0		5			0		5		4		5		0		0
6		6		0		2		0		6		0		9		0		0		1		6		24		9		2		0			0		4			16		0		2		0		10		0
2		5		0		1		0		5		0		10		0		0		3		6		21		4		2		0			6		4			0		0		6		0		0		0
9		5		0		0		0		4		9		4		0		0		4		6		29		3		2		0			14		4			6		4		7		0		0		89
7		7		6		0		3		6		0		5		7		0		3		8		19		5		1		0			0		5			6		0		5		0		0		0
7		6		0		5		0		5		0		4		0		0		6		6		21		4		2		0			5		4			0		0		5		0		0		0
4		5		6		0		0		7		0		7		0		0		4		9		28		6		3		0			0		4			0		4		5		0		0		102
0		9		0		0		0		0		0		5		0		0		6		9		23		3		3		0			0		5			0		0		3		0		0		102
6		3		0		0		5		0		0		5		0		0		1		11		20		5		3		0			0		4			6		0		5		6		6		0
10		6		0		0		0		5		4		6		0		0		4		10		24		7		2		0			5		4			6		0		4		10		0		0
0		7		0		0		0		6		0		2		0		0		4		11		24		4		3		0			0		6			0		0		0		6		0		0
7		3		0		4		0		0		0		8		4		0		4		6		23		9		3		0			0		6			0		0		10		6		0		0
4		2		0		7		3		0		0		0		0		0		0		11		31		5		2		0			10		4			6		0		4		0		0		0
6		9		4		0		0		9		5		5		0		0		9		10		22		4		3		0			0		5			0		0		3		0		0		0
0		7		0		0		0		0		0		9		0		0		4		9		30		5		1		0			0		5			0		0		3		5		0		0
0		5		0		0		0		9		0		7		0		0		9		7		21		6		1		2			10		1			10		0		7		5		0		0
0		2		0		0		0		0		0		6		0		0		3		6		24		7		3		0			0		5			10		0		6		16		0		0
5		9		0		0		0		7		0		3		6		0		1		3		27		2		2		0			6		5			0		0		7		0		0		0
0		9		0		1		0		13		0		5		0		0		2		5		31		7		3		0			0		6			0		0		4		10		0		0
6		7		0		0		0		0		0		4		0		0		0		8		26		3		2		0			0		2			0		0		6		0		10		0
6		6		0		0		0		0		7		0		0		0		6		7		19		3		1		1			24		3			10		8		1		0		0		92
7		7		0		3		0		9		0		0		4		0		0		8		20		7		2		0			6		5			0		0		4		6		0		0
4		9		0		0		0		0		0		3		8		0		4		8		28		4		3		0			0		3			0		0		3		0		0		95
0		6		0		0		0		0		0		1		8		0		0		6		25		3		2		0			0		2			0		0		2		0		0		0
3		4		0		0		0		7		0		5		0		0		7		9		26		4		4		0			0		3			0		0		5		16		0		76
5		5		0		0		0		1		0		0		0		0		5		13		18		7		1		0			0		3			5		0		3		6		6		0
0		6		0		0		0		0		0		6		0		0		10		6		31		3		1		0			26		4			0		6		9		10		0		0
8		4		0		0		0		6		0		9		0		0		7		10		23		4		1		0			15		3			0		0		7		6		0		0
8		8		0		0		0		4		9		9		0		0		3		12		25		1		3		0			0		5			0		5		6		0		0		102
0		5		0		0		0		0		0		0		2		0		5		8		29		3		2		0			0		6			10		0		7		6		0		80
6		2		0		0		0		0		0		0		0		0		0		9		27		2		2		0			0		5			0		4		2		6		6		0
2		6		1		0		2		4		0		2		0		0		5		8		26		7		3		0			6		3			0		0		5		0		16		0
0		3		0		0		0		6		0		8		0		0		0		6		26		6		2		0			21		4			0		8		7		0		0		0
0		5		0		0		0		6		0		5		0		0		4		8		30		5		2		0			0		4			0		3		4		0		0		80
8		6		0		0		0		3		0		0		6		0		5		10		20		7		3		0			14		3			10		0		6		5		0		0
0		2		0		0		0		7		0		7		6		0		6		5		22		7		1		0			0		5			0		0		8		6		0		0
0		11		0		0		0		7		0		0		0		0		2		7		25		7		2		0			0		4			0		10		7		5		6		0
1		8		0		0		4		6		0		4		0		0		15		6		21		3		2		0			3		4			0		6		3		6		0		0
4		7		0		0		0		6		0		4		4		0		5		6		26		4		3		0			0		1			6		0		7		0		0		0
7		11		0		5		0		9		0		4		0		0		0		6		29		9		2		0			0		4			5		10		3		5		0		70
2		6		0		0		0		3		0		6		3		0		7		9		26		6		4		0			0		4			0		5		5		0		0		0
5		4		0		0		0		3		0		3		0		0		0		6		27		8		1		0			0		5			0		3		0		6		0		71
7		5		0		3		0		9		0		9		0		0		9		11		23		3		3		0			0		2			0		4		5		0		0		103
7		9		0		0		0		0		0		1		0		0		6		6		30		3		3		0			0		1			0		0		2		6		10		76
5		6		0		0		0		12		0		6		0		0		8		3		25		3		3		0			15		6			0		5		7		0		0		96
0		8		0		4		0		0		12		7		0		0		0		7		25		2		2		0			0		4			0		0		2		0		0		107
2		10		0		5		0		0		0		0		6		0		2		9		23		6		3		0			0		6			0		0		8		0		0		81
4		7		0		0		5		4		8		6		0		0		4		11		21		1		2		0			0		4			0		3		0		0		0		0
0		5		0		0		0		0		3		5		0		0		4		10		31		8		2		0			0		5			0		0		7		0		0		0
3		3		1		3		0		4		0		1		0		0		0		7		25		6		2		0			0		3			10		0		5		6		0		82
7		2		0		0		0		5		0		8		0		0		0		12		25		7		2		0			0		2			0		0		0		10		0		0
1		6		7		0		0		1		0		3		0		0		0		7		29		6		1		0			0		3			10		0		0		0		10		0
4		11		0		0		0		3		8		4		0		0		3		11		27		5		3		0			15		6			0		6		10		16		0		0
0		9		0		4		0		11		0		5		0		0		8		11		32		3		1		0			0		5			0		0		2		0		0		0
8		5		0		0		0		5		6		10		0		0		9		7		25		4		1		0			0		5			0		0		2		6		10		0
8		10		0		8		0		9		0		4		0		0		7		9		29		8		3		0			15		6			0		3		2		6		10		93
0		3		7		0		0		3		0		0		0		0		2		9		26		4		1		0			5		4			0		0		0		6		0		0
9		2		0		0		0		0		0		16		0		0		6		9		28		5		2		0			0		5			0		6		8		0		0		0
0		6		0		0		0		8		0		6		0		0		4		10		30		4		2		0			0		5			10		6		2		5		6		0
1		5		1		0		0		5		0		7		0		0		5		7		20		5		2		0			4		3			0		0		9		16		0		0
5		11		0		2		0		0		1		0		0		0		4		13		29		5		2		0			6		6			0		2		4		10		0		102
0		10		7		3		0		0		2		5		0		0		10		3		26		5		2		0			0		6			0		0		5		0		0		0
6		8		0		0		0		5		0		3		8		0		4		6		25		5		1		0			6		5			0		9		8		0		0		88
0		5		0		5		0		6		0		2		0		0		0		10		22		4		3		0			0		4			0		3		10		10		5		0
11		1		0		0		0		6		3		10		0		0		5		8		25		3		1		0			24		4			0		0		3		0		0		87
1		9		0		1		0		1		0		5		5		0		0		6		20		6		0		0			0		2			6		0		9		0		0		91
7		8		0		3		0		5		0		9		0		0		5		10		24		6		2		0			0		5			0		0		0		10		0		0
8		12		0		0		0		5		0		6		9		0		5		7		24		3		1		0			0		5			5		0		7		6		0		5
4		8		1		0		0		0		0		2		0		0		0		10		27		5		2		0			0		5			10		9		7		6		10		0
3		6		1		0		0		0		0		4		0		0		5		8		26		5		1		0			5		6			0		6		1		10		6		75
8		5		0		0		0		4		0		4		0		0		5		4		18		6		2		0			5		4			0		0		10		0		5		0
7		0		0		0		0		0		0		0		3		0		5		8		23		3		3		0			5		5			0		0		4		6		0		82
6		4		0		0		0		0		0		2		0		0		5		7		25		8		4		0			0		4			0		0		7		6		0		0
4		7		0		0		0		0		0		0		8		0		9		10		26		4		3		0			0		4			0		0		4		0		0		91
0		7		0		0		0		0		0		9		0		0		4		10		28		6		1		0			0		5			0		9		5		0		10		0
4		4		0		2		0		2		0		8		0		0		6		10		24		5		4		0			13		6			0		4		8		10		0		78
7		4		0		0		0		6		0		6		0		0		11		4		26		6		2		0			0		4			0		0		4		0		0		0
3		7		0		0		0		0		0		5		0		0		14		9		22		6		1		0			0		5			0		0		6		0		0		0
8		6		0		0		0		0		5		5		7		0		3		8		22		4		3		0			0		6			0		4		0		6		0		87
5		7		0		0		0		0		7		1		4		0		4		9		27		7		2		0			0		4			0		0		4		0		0		0
0		7		3		0		0		0		0		4		6		0		0		9		22		10		3		0			6		2			0		0		6		10		6		0
11		4		0		0		3		3		0		5		0		0		6		7		21		2		1		0			19		4			0		3		8		6		0		0
4		6		0		0		0		7		0		4		4		0		7		5		27		5		4		0			11		4			0		0		4		16		0		0
5		9		0		0		0		0		0		6		0		0		9		5		24		4		2		0			0		3			0		0		3		6		0		69
5		0		0		0		0		0		2		9		0		0		6		7		20		2		1		0			0		6			0		0		3		0		0		0
0		10		0		0		0		5		0		8		2		0		4		8		24		4		2		0			5		3			0		1		7		10		0		87
7		4		0		0		0		13		3		3		0		0		7		9		25		7		1		0			0		3			0		0		4		0		6		81
4		3		0		0		0		1		0		0		0		0		6		11		28		5		1		0			6		3			0		6		6		6		0		0
0		5		0		0		0		6		0		8		6		0		7		8		23		1		3		0			0		4			0		2		6		0		0		76
4		2		0		4		0		0		0		7		3		0		3		6		18		3		2		0			16		2			0		4		7		0		0		88
13		3		0		0		0		0		0		4		0		0		4		8		23		3		2		0			0		3			0		0		2		0		0		94
6		11		0		0		0		3		5		6		0		0		0		3		32		4		2		0			4		4			0		0		6		6		0		0
9		6		0		0		0		6		0		6		0		0		6		9		29		4		1		0			0		1			0		0		7		0		6		79
6		1		0		3		3		6		0		6		0		0		7		4		20		6		2		0			32		4			0		0		2		0		0		0
0		3		0		0		0		5		0		6		0		0		0		4		22		6		2		0			27		4			0		5		0		0		0		0
3		0		0		0		0		4		0		6		0		0		5		11		29		8		2		0			0		5			0		0		6		10		0		0
3		5		0		0		0		0		3		5		0		0		5		8		27		6		1		0			0		7			0		0		2		0		0		84
0		5		0		0		0		8		0		6		8		0		0		7		24		5		1		0			0		2			16		5		5		5		0		73
6		8		0		0		0		4		0		0		0		0		7		3		28		4		2		0			0		3			0		0		10		0		0		0
4		9		0		0		0		0		7		4		0		0		5		9		27		5		2		0			0		3			0		0		6		0		0		0
0		3		5		1		0		0		0		11		4		0		8		9		25		7		1		0			0		4			0		2		10		0		0		0
6		5		0		0		0		6		8		6		0		0		4		10		17		4		4		0			15		2			0		0		1		10		6		0
2		10		0		7		2		0		0		3		0		0		8		9		24		7		4		0			5		4			0		0		7		0		0		0
9		8		0		0		0		6		0		5		0		0		9		11		28		3		3		0			0		6			10		9		0		10		0		0
6		7		0		3		0		7		0		5		0		0		0		7		17		4		2		0			0		3			10		0		9		0		5		0
0		4		0		0		0		5		0		5		6		0		1		13		20		4		3		0			13		5			0		8		4		5		0		76
0		3		0		0		0		3		0		9		0		0		5		5		17		5		0		0			4		4			10		0		4		0		0		0
5		8		0		0		0		5		0		11		2		0		3		7		16		6		2		0			0		5			0		0		4		0		0		97
9		3		0		0		0		0		5		0		0		0		12		4		24		4		2		0			0		3			0		9		3		0		0		0
6		8		0		4		0		0		0		5		7		0		5		6		24		6		2		0			0		5			0		0		7		10		0		83
7		5		9		0		0		0		4		0		3		0		0		7		24		3		1		0			0		1			0		0		5		0		0		0
0		5		0		0		0		0		0		8		0		0		8		7		26		3		3		0			0		5			16		0		4		0		16		65
0		5		0		0		0		0		0		0		8		0		3		8		27		8		2		0			12		2			0		0		2		10		0		0
3		8		4		0		0		3		0		4		3		0		5		6		27		5		3		0			0		1			0		0		2		10		0		83
0		4		2		3		0		0		0		8		0		0		3		6		19		5		1		0			0		2			6		0		4		0		0		0
6		3		0		0		0		8		0		6		0		0		3		6		25		7		3		0			0		0			0		0		4		0		6		0
0		13		0		0		0		8		0		0		0		0		7		7		23		5		2		0			6		4			6		0		6		0		6		0
6		6		0		0		0		6		9		2		0		0		3		3		28		7		1		0			8		3			0		0		4		6		0		0
7		10		0		0		0		0		0		8		6		0		6		8		24		6		1		0			0		2			10		7		7		0		0		0
8		5		1		0		0		4		10		10		0		0		0		11		25		6		2		0			0		3			0		8		8		0		10		0
9		7		0		0		2		6		6		4		0		0		0		5		24		6		2		0			6		3			0		7		4		0		6		0
9		9		0		0		0		5		7		4		0		0		2		5		26		6		0		0			5		7			0		9		7		0		0		0
0		9		0		0		0		0		3		5		9		0		5		8		20		2		2		0			0		5			0		3		4		0		0		0
8		4		0		0		4		0		0		3		0		0		5		10		21		6		2		0			0		4			0		5		5		0		0		101
6		5		0		0		0		0		0		6		2		0		0		7		23		3		2		0			0		5			0		0		5		0		0		89
11		3		0		1		0		0		0		0		0		0		6		4		28		5		2		0			4		2			0		0		5		6		0		0
2		4		0		0		0		6		0		1		0		0		4		7		30		4		1		0			0		5			10		0		3		0		0		76
4		5		0		3		3		3		0		5		0		0		0		5		23		7		4		0			0		3			0		0		8		0		10		91
9		4		0		0		0		6		0		0		5		0		7		8		22		4		2		0			4		3			16		0		6		0		0		92
4		3		0		0		0		8		3		6		6		0		2		5		32		7		2		0			0		6			0		0		3		6		0		0
9		11		0		0		0		0		0		0		9		0		5		6		30		3		2		0			0		5			0		10		4		20		0		0
5		6		0		1		0		6		0		5		2		0		1		8		26		8		2		0			0		4			0		4		5		10		0		86
5		7		0		0		0		9		0		10		0		0		0		10		19		2		3		0			0		4			0		0		3		10		10		0
3		3		0		0		2		4		0		0		0		0		4		6		24		2		1		0			27		2			0		5		8		0		0		0
7		5		0		0		0		1		6		11		0		0		8		10		25		5		1		0			10		4			0		0		0		0		0		83
9		7		0		0		0		0		0		7		0		0		0		6		27		6		2		0			0		1			0		7		4		10		0		0
0		3		0		0		0		2		0		5		0		0		0		7		26		5		3		0			0		5			0		3		5		0		0		84
0		1		0		0		0		0		0		0		0		0		6		3		27		7		3		0			0		4			0		5		5		6		10		0
1		8		0		0		0		4		0		5		0		0		0		11		23		5		3		0			12		4			10		5		8		10		0		0
3		8		5		0		0		5		8		0		7		0		6		10		35		3		3		0			0		4			0		11		8		0		0		0
4		11		0		0		0		5		0		7		0		0		6		5		22		8		1		0			0		4			0		0		8		0		0		68
6		7		0		0		0		9		0		0		0		0		5		7		25		6		3		0			0		2			0		5		0		6		0		0
0		6		0		0		0		2		0		1		8		0		5		5		24		4		3		0			0		3			0		0		5		0		0		80
3		5		0		3		0		0		0		1		0		0		0		5		24		3		2		0			0		7			6		0		6		0		0		0
5		3		0		0		0		5		0		11		0		0		1		7		24		4		2		0			0		2			6		5		2		6		0		76
0		10		0		0		0		3		0		5		0		0		9		5		28		6		2		0			0		3			0		7		7		10		0		0
7		5		0		0		0		5		0		3		0		0		4		13		21		4		2		0			0		6			0		0		4		10		0		97
3		6		0		0		0		4		3		6		4		0		8		6		21		3		1		0			6		2			10		5		5		0		0		0
0		7		0		0		0		4		0		6		0		0		5		10		23		5		2		0			0		2			0		0		2		0		0		83
7		5		0		2		0		8		5		6		0		0		0		9		31		6		4		0			0		1			0		6		4		10		0		100
6		4		0		2		0		0		0		2		0		0		8		7		23		3		2		0			0		4			0		0		6		6		0		0
5		10		0		0		0		6		0		2		0		0		5		7		21		5		2		0			0		4			10		7		0		6		10		0
4		5		0		0		0		9		0		3		0		0		6		4		26		4		4		0			19		2			0		0		2		6		0		0
4		4		0		0		0		4		0		9		0		0		6		8		32		2		2		0			0		4			0		0		6		6		0		0
0		10		0		0		0		9		0		1		0		0		7		9		32		4		2		0			0		6			0		0		7		6		0		0
6		11		0		0		0		0		0		8		0		0		8		4		25		9		1		0			16		3			0		0		3		0		0		93
2		5		0		0		0		8		0		8		8		0		11		8		20		5		2		0			0		2			0		0		6		0		0		0
7		8		0		0		0		0		0		5		0		0		9		9		23		6		2		0			0		2			6		9		3		16		0		94
5		4		0		0		0		10		8		6		0		0		11		5		27		5		3		0			0		4			0		0		1		6		0		0
8		3		0		0		0		2		0		0		4		0		2		10		21		7		2		0			0		4			0		0		8		0		0		0
1		9		0		0		0		0		8		8		0		0		1		9		23		5		3		0			0		1			10		0		6		0		6		0
7		5		0		0		0		12		0		0		6		0		8		8		29		5		3		0			16		1			0		8		4		6		0		88
3		6		7		0		0		6		0		2		0		7		9		7		26		4		2		0			16		6			10		6		6		5		0		0
8		9		0		0		0		0		0		5		0		0		1		11		21		3		2		0			0		2			0		0		7		0		0		88
2		6		0		0		0		5		0		5		0		0		6		5		27		3		3		0			0		5			0		7		5		6		0		0
10		10		0		0		0		9		5		4		2		0		7		8		33		5		4		0			0		3			0		9		5		5		0		0
7		4		0		0		0		0		6		0		0		0		3		8		21		5		2		0			0		4			0		0		5		0		0		78
3		2		0		3		0		0		0		0		5		0		10		5		21		5		3		0			16		4			0		7		5		16		0		84
6		8		0		6		0		4		0		7		0		0		4		12		26		4		2		0			0		4			0		0		1		0		0		0
6		3		0		0		0		0		0		8		0		0		0		8		29		6		3		0			0		5			6		0		8		5		0		96
9		8		0		3		0		4		0		6		0		0		5		6		29		3		2		0			0		4			16		0		1		16		0		92
4		4		0		0		1		7		0		2		6		0		0		8		22		6		1		0			0		6			0		0		6		10		0		0
10		5		0		0		0		8		0		2		0		0		2		6		21		2		3		0			0		2			0		4		1		10		0		88
4		5		0		0		0		4		0		4		0		0		3		10		23		5		3		0			0		5			0		2		4		0		6		97
9		10		0		0		0		11		0		8		7		0		5		7		22		6		2		0			15		3			0		0		5		10		0		0
6		2		0		0		0		6		0		8		0		0		4		10		31		4		2		0			0		5			0		0		7		0		0		0
0		6		0		0		0		5		0		3		0		0		3		11		27		5		2		0			0		6			10		0		3		6		0		81
7		8		0		0		0		2		0		9		0		0		5		9		17		8		2		0			0		6			0		0		4		0		0		0
6		1		0		0		0		8		0		3		0		0		5		7		27		3		2		0			0		3			0		0		8		0		6		0
0		7		0		0		0		7		0		3		11		0		0		4		25		3		3		0			33		4			0		2		2		0		16		0
3		9		0		0		0		0		0		3		0		0		0		12		27		5		2		0			24		2			0		0		9		10		10		86
2		6		0		0		0		8		0		5		0		0		5		7		23		7		3		0			23		7			0		0		0		0		0		77
4		5		0		4		0		0		9		9		0		0		7		6		26		7		2		0			0		3			0		0		6		6		0		0
0		3		0		0		0		9		0		3		5		0		5		12		31		3		2		0			0		5			0		0		6		6		0		68
2		6		0		0		0		1		0		3		2		0		3		7		23		6		2		0			0		4			0		3		5		0		0		84
0		4		0		7		0		0		0		6		0		0		0		11		25		5		2		0			0		3			0		0		7		10		0		87
0		6		0		0		0		5		0		3		0		0		2		9		28		3		1		0			0		4			0		0		0		6		0		97
6		7		0		0		0		9		0		4		0		0		6		5		31		4		2		0			10		5			5		0		3		0		0		0
0		5		0		0		0		0		0		2		6		0		2		4		23		3		2		0			0		1			6		3		0		0		0		77
3		1		0		0		0		6		0		1		0		0		6		5		24		3		2		0			6		5			0		3		2		10		0		96
4		5		0		0		0		2		0		6		0		0		3		7		30		5		1		0			0		6			0		7		5		6		10		0
2		8		0		0		0		4		4		8		2		0		2		7		25		6		3		0			24		4			0		6		7		0		0		0
6		8		3		0		0		5		0		5		0		0		9		5		28		3		1		0			0		4			6		0		5		0		6		0
7		5		0		0		0		4		9		9		5		0		6		7		17		6		2		0			21		4			0		0		0		10		0		0
4		5		0		0		0		2		5		5		0		0		4		9		28		6		1		0			9		4			0		0		8		6		0		0
4		3		0		0		0		6		0		3		0		0		1		13		29		3		1		0			0		3			0		0		6		0		0		99
3		4		0		6		0		8		0		7		5		0		8		10		28		4		2		0			0		5			0		3		1		0		0		75
4		0		0		5		0		0		0		0		0		0		6		8		18		5		1		0			0		4			0		2		0		0		5		0
11		7		0		0		0		0		7		3		0		0		4		10		23		2		1		0			3		6			0		0		13		0		0		80
0		7		0		0		0		6		0		0		0		0		0		9		25		5		2		0			0		8			10		0		8		0		10		0
6		4		0		0		0		4		0		6		6		0		7		9		22		7		2		0			5		2			10		0		9		16		0		77
4		5		0		0		0		0		0		7		0		0		4		9		26		7		0		0			0		6			0		3		1		0		0		94
8		8		0		0		5		0		0		0		5		0		2		6		24		3		2		0			6		6			0		0		10		0		0		0
0		5		0		0		0		5		0		3		3		0		7		9		20		3		2		0			6		3			6		6		3		0		6		91
9		9		0		4		0		5		0		0		9		0		6		8		24		2		1		0			5		5			0		0		4		6		0		53
5		2		0		0		0		0		4		0		0		0		3		6		25		5		1		0			13		5			0		4		10		6		0		0
3		5		0		0		0		2		0		8		5		0		3		10		24		6		4		0			0		3			0		0		7		0		6		0
10		3		7		5		0		4		0		0		0		0		3		8		26		7		1		0			5		0			0		0		0		6		0		0
0		2		0		0		0		0		8		7		0		0		2		8		24		8		2		0			0		3			0		9		7		5		0		0
0		6		0		0		0		5		0		2		0		0		6		7		29		3		3		0			0		4			0		5		7		0		0		0
4		5		0		0		0		0		0		7		0		0		4		10		28		6		3		0			5		5			16		5		7		0		0		76
11		5		0		0		0		4		0		1		0		0		6		11		21		3		3		0			4		5			0		5		8		0		0		84
6		7		0		0		0		8		0		7		0		0		4		7		22		6		2		0			0		6			0		0		8		0		0		0
0		6		0		0		0		8		0		3		0		0		0		8		28		6		2		0			0		5			0		0		13		6		0		0
6		8		0		0		0		7		0		5		0		0		9		8		22		3		1		0			0		4			16		4		2		0		6		0
7		3		0		0		0		0		0		3		4		0		11		5		26		4		1		0			5		6			0		4		9		0		0		0
0		12		0		4		0		9		0		5		5		0		0		8		25		4		3		0			0		3			0		0		2		6		0		74
5		7		0		5		0		6		9		10		0		0		5		7		21		6		2		0			4		3			0		3		6		0		0		76
8		9		0		0		0		7		0		7		0		0		0		9		21		4		1		0			0		3			10		0		7		6		0		98
3		9		0		0		0		1		0		7		5		0		9		9		25		4		2		0			0		5			0		0		2		0		0		89
9		6		0		0		0		0		0		4		8		0		6		7		32		4		3		0			0		2			10		0		1		10		0		67
0		5		0		0		0		3		0		7		3		0		3		8		29		6		2		0			0		5			0		0		6		16		16		90
2		7		0		0		0		9		5		8		2		0		4		10		25		5		1		0			31		2			0		6		4		0		0		0
0		5		0		0		0		1		0		0		8		0		4		10		28		3		2		0			6		7			0		0		7		5		0		77
5		6		0		0		0		3		3		6		7		0		3		10		20		6		0		0			0		5			0		1		1		0		0		72
3		5		0		0		1		4		0		4		0		0		7		7		25		8		2		0			0		4			0		0		4		10		10		0
5		5		0		0		0		0		0		3		0		0		3		8		18		7		2		0			34		5			0		0		3		5		0		76
10		5		0		0		0		6		0		5		0		0		4		10		25		6		2		0			0		5			0		0		2		6		0		0
0		5		0		8		0		2		0		0		0		0		0		10		23		7		4		0			4		4			0		0		4		6		0		0
0		9		0		0		0		4		0		0		0		0		7		10		23		5		0		0			0		5			0		5		6		10		0		76
6		3		2		0		0		0		0		0		7		0		8		3		29		7		1		0			0		2			0		3		0		6		0		0
0		2		0		0		0		4		0		0		7		0		5		9		25		5		2		0			0		2			0		6		6		10		10		88
0		7		0		0		0		0		0		6		0		0		0		9		29		6		2		0			25		4			0		1		4		0		0		0
5		4		0		7		0		3		0		11		0		0		6		8		27		4		0		0			14		4			0		6		0		16		0		0
3		4		6		0		0		0		0		5		0		0		0		8		20		8		1		0			0		3			6		0		1		0		0		88
4		4		3		0		0		4		0		5		6		0		0		6		24		2		2		0			0		6			0		0		10		0		0		73
3		0		0		0		0		0		0		7		0		0		0		8		20		5		4		0			5		3			0		0		4		10		0		82
1		4		0		0		0		4		0		12		0		0		6		15		21		9		2		0			6		5			0		0		5		0		0		0
9		7		0		0		0		0		9		4		9		0		5		7		26		3		0		0			0		3			0		0		5		0		0		0
4		8		0		0		0		6		0		6		0		0		4		10		26		5		2		0			0		5			10		4		0		10		0		0
4		7		0		0		4		0		0		4		0		0		3		10		23		4		1		0			0		6			0		0		7		10		6		0
3		5		0		0		0		0		10		0		0		0		3		9		23		6		4		0			5		7			6		0		5		0		0		0
0		6		0		0		0		7		0		5		8		0		8		5		32		3		3		0			25		4			0		0		4		10		0		0
8		7		0		0		0		4		5		8		7		0		8		7		29		6		1		0			0		2			0		5		8		0		6		85
7		7		0		0		0		4		0		5		0		0		5		7		25		7		0		0			22		7			0		5		10		6		10		0
7		2		0		0		0		7		0		4		0		0		0		9		23		9		0		0			15		3			0		0		0		0		0		92
3		3		0		0		0		0		0		2		0		0		5		9		27		5		2		0			0		4			0		5		0		6		0		0
10		10		0		0		0		0		0		3		0		0		2		6		29		3		2		0			0		5			0		0		4		16		6		0
3		8		0		0		0		0		0		6		0		0		9		4		22		6		2		0			33		6			10		5		3		0		0		0
9		6		3		0		0		6		0		7		4		0		7		10		21		4		2		0			0		2			0		11		2		0		6		0
2		5		0		0		5		2		0		2		0		0		6		10		25		5		2		0			9		5			10		0		4		0		0		95
3		4		0		0		0		7		5		1		0		0		0		12		26		4		1		0			0		2			0		0		6		6		16		0
6		7		7		0		0		4		0		0		0		0		2		9		21		3		0		0			13		4			0		2		3		5		0		0
0		2		5		0		5		7		0		0		3		0		0		6		27		6		1		0			0		5			0		0		9		0		0		100
10		5		0		0		0		4		0		8		6		0		0		8		26		2		0		0			0		4			0		4		3		10		0		0
12		7		5		0		0		4		9		5		1		0		5		7		24		6		0		0			0		6			0		6		0		6		0		0
0		1		0		0		0		0		7		0		0		0		5		7		26		6		0		0			0		1			0		3		7		10		0		0
9		10		5		0		0		5		4		5		7		0		6		8		27		7		1		0			0		4			0		6		4		0		0		0
5		7		0		3		0		8		0		6		0		0		10		9		26		8		1		0			0		6			0		0		8		10		0		0
5		3		0		1		0		1		6		1		0		0		4		8		31		5		1		0			0		4			6		0		6		0		0		0
0		3		0		0		0		8		0		6		4		0		6		8		24		8		3		0			0		4			0		0		4		0		6		0
0		4		0		0		0		9		0		0		0		0		4		5		20		4		2		0			4		5			0		6		11		10		0		0
3		4		0		0		0		0		0		5		0		0		6		9		26		6		3		0			0		3			0		2		2		6		0		0
3		4		5		3		0		0		0		3		6		0		7		8		27		5		3		0			0		3			0		7		2		10		0		0
8		4		0		0		1		6		0		4		0		0		0		9		27		5		2		0			0		6			0		0		6		0		5		66
3		0		0		0		0		11		0		0		0		0		7		9		19		5		2		0			17		5			5		2		8		16		0		0
4		5		0		0		0		8		7		0		0		0		7		7		23		6		2		0			0		7			0		0		8		6		0		0
0		1		0		0		0		9		5		6		0		0		0		8		26		6		2		0			0		7			0		0		3		0		6		0
7		4		0		3		0		7		1		8		0		0		1		9		22		3		3		0			6		5			0		0		8		0		0		0
7		9		0		0		0		4		0		3		7		0		4		6		31		4		3		0			0		3			0		0		5		0		0		0
4		6		0		3		0		0		0		7		0		0		5		9		24		3		4		0			0		4			0		0		5		6		6		0
3		6		0		0		0		0		0		11		0		0		7		8		20		4		2		1			6		3			0		0		5		10		6		0
7		6		0		1		0		0		6		5		0		0		5		8		23		5		2		0			5		3			0		0		4		5		0		76
9		6		0		0		0		0		8		7		0		0		0		11		26		7		3		0			0		2			0		0		2		5		6		0
1		6		0		0		0		0		0		8		0		0		9		5		23		7		1		0			4		5			6		0		6		0		0		86
5		4		0		0		0		3		5		3		0		0		5		10		25		5		1		0			0		6			5		0		8		0		0		0
5		3		0		0		0		0		2		5		0		0		3		10		21		3		3		0			0		7			0		0		5		0		0		70
1		4		0		0		0		6		0		6		0		0		2		7		25		6		2		0			15		6			0		8		9		0		0		0
3		6		0		0		0		8		0		0		0		0		0		7		24		3		3		0			0		4			6		9		8		0		10		0
0		0		0		2		0		4		0		0		0		0		0		7		20		5		3		0			16		5			6		6		6		6		0		0
6		3		0		0		4		0		0		8		0		0		6		9		24		6		3		0			0		3			0		0		7		0		0		88
6		8		0		0		0		7		8		7		0		0		1		10		30		3		2		0			15		3			0		0		6		6		6		0
0		9		0		0		4		7		0		3		0		0		3		9		23		5		3		0			6		2			0		0		5		5		10		0
5		5		0		0		0		4		6		0		0		0		0		6		32		5		3		0			7		4			0		0		3		0		0		0
4		6		0		0		0		0		4		2		0		0		0		7		31		4		3		0			16		1			0		6		0		0		0		56
3		2		0		0		0		0		0		8		0		0		6		7		27		7		3		0			15		3			0		0		4		0		0		0
0		5		0		0		0		0		4		9		0		0		7		5		32		7		3		0			0		4			6		4		6		6		0		0
6		11		0		0		0		0		0		5		0		0		2		9		22		4		3		0			16		5			0		0		6		0		0		76
2		7		0		5		0		0		0		2		0		0		3		8		21		4		3		0			0		4			10		0		6		0		0		66
6		4		0		0		0		4		0		5		0		0		5		6		21		3		3		0			0		3			0		2		7		10		0		104
4		4		0		0		0		5		8		7		10		0		4		8		29		4		3		0			0		4			0		8		9		0		0		94
2		15		0		0		0		2		5		7		0		0		5		5		28		4		1		0			0		4			6		4		6		6		0		0
2		6		0		0		0		0		0		0		4		0		10		11		22		5		2		0			6		4			5		0		7		10		10		0
5		4		0		0		0		7		6		5		1		0		0		7		19		5		2		0			5		4			0		0		3		10		0		0
7		6		9		0		0		0		3		4		0		0		3		3		24		7		2		0			0		4			0		0		0		6		0		75
0		7		0		0		0		5		0		0		0		0		11		10		30		5		0		0			0		4			0		1		8		10		0		0
8		7		0		6		0		5		5		0		0		0		6		7		21		7		0		0			0		3			0		0		5		0		0		0
4		8		0		0		0		6		8		3		0		0		10		7		23		6		2		0			0		7			6		0		9		10		10		0
4		4		0		0		0		7		0		3		10		0		9		9		26		5		1		0			13		4			5		2		1		0		0		0
6		4		0		0		6		0		0		7		0		0		0		11		25		2		2		0			0		6			10		0		0		0		0		89
10		3		0		0		0		4		4		7		0		0		7		8		25		3		2		0			0		3			0		0		5		0		0		97
2		9		0		0		0		3		0		1		8		2		7		7		23		5		3		0			0		6			0		8		5		0		0		0
3		5		0		0		0		0		0		7		2		0		6		8		20		6		2		0			0		5			6		0		7		16		0		78
2		3		0		0		0		7		0		4		0		0		5		9		31		4		2		0			0		4			0		0		5		0		10		0
0		7		0		0		2		5		7		0		0		0		2		9		27		5		1		0			14		6			0		0		9		0		6		88
4		8		0		2		0		7		4		6		0		0		3		6		22		2		2		0			15		3			0		0		2		5		10		0
5		7		0		7		0		6		0		0		5		0		10		11		22		8		1		0			22		4			6		0		6		6		0		78
3		4		0		0		0		0		0		0		0		0		6		8		23		4		2		0			24		6			0		0		6		0		0		0
9		5		0		0		0		10		0		6		0		0		5		7		22		8		2		0			0		3			0		0		5		0		0		78
11		6		2		1		0		4		0		10		0		0		5		5		20		5		4		0			0		2			10		0		6		0		0		85
6		8		0		4		3		8		0		9		6		0		5		8		26		6		2		0			4		4			0		0		7		10		0		0
9		3		9		0		0		1		0		3		9		0		4		8		20		5		2		0			0		5			10		0		5		0		0		0
9		5		0		0		0		8		0		2		0		0		3		7		30		6		3		0			6		4			0		0		6		0		0		0
4		6		0		0		0		6		5		1		6		0		6		9		25		3		2		0			0		2			0		2		10		0		0		66
6		5		0		0		0		4		6		3		0		0		7		8		26		7		2		0			0		3			10		0		1		6		16		0
0		4		0		6		0		0		8		4		0		0		5		10		27		4		2		0			14		4			0		6		3		10		6		85
7		7		0		0		0		9		0		3		0		0		7		7		34		6		1		0			3		4			0		9		6		0		6		81
4		5		0		0		0		3		8		6		5		0		2		8		26		3		4		0			15		7			0		0		4		6		0		77
5		11		0		6		0		4		0		6		0		0		5		5		20		6		2		0			0		4			0		6		1		10		0		0
8		11		0		0		0		5		2		0		0		0		0		10		28		4		4		0			0		3			10		0		5		6		0		91
6		12		0		0		0		5		1		5		0		0		2		9		28		7		2		0			0		4			0		0		5		10		0		0
1		7		0		0		0		4		0		4		0		0		6		6		24		2		2		0			0		5			0		0		6		0		0		0
2		8		0		0		0		7		8		4		0		0		2		11		25		7		3		0			0		5			0		9		7		10		0		90
5		6		0		3		0		0		7		1		0		0		5		10		28		5		3		0			0		4			0		2		0		6		5		0
5		4		0		0		0		6		0		3		0		0		6		12		26		6		2		0			17		6			10		7		7		0		0		93
6		7		0		0		0		0		5		1		0		0		5		10		30		6		2		1			0		6			6		0		5		0		0		0
9		6		0		6		0		0		0		5		0		0		0		5		28		3		2		0			0		2			0		8		3		0		0		0
4		0		0		0		0		0		0		8		10		0		4		11		24		4		3		0			0		4			10		0		1		6		0		0
7		6		0		0		0		4		0		6		0		0		6		6		24		9		2		0			0		3			10		7		6		0		0		0
9		4		0		4		0		6		0		5		6		0		10		6		26		5		3		0			15		3			0		0		3		6		10		83
5		5		0		0		0		7		0		0		3		0		10		9		23		5		1		0			3		5			10		8		2		6		10		0
5		4		0		0		0		11		5		3		0		0		6		7		23		4		3		0			14		5			0		7		6		6		5		0
0		2		0		0		0		8		3		0		0		0		0		10		26		6		1		1			17		5			0		0		6		0		10		0
2		5		0		0		0		6		1		12		2		0		6		9		19		3		4		0			15		5			0		0		4		5		10		0
8		9		0		0		0		3		8		0		7		0		3		9		22		6		3		0			15		2			0		4		11		5		9		0
3		4		0		0		0		2		0		5		0		0		8		5		23		3		0		0			18		4			0		0		8		0		6		96
5		3		0		0		2		0		0		4		0		0		3		7		20		4		3		0			24		4			0		10		4		0		0		0
3		3		0		3		0		9		6		12		8		0		1		8		16		5		1		0			0		4			0		0		6		0		6		0
5		8		0		4		0		4		0		6		0		0		4		6		27		3		2		0			25		1			0		0		3		0		6		90
4		4		0		0		0		0		0		4		0		0		0		8		28		5		1		0			5		3			16		0		8		10		0		92
6		6		0		0		0		0		0		5		4		0		5		9		23		3		4		0			6		4			10		1		4		0		6		97
9		8		0		4		0		0		7		9		0		0		0		10		26		3		3		0			4		4			0		0		6		0		6		0
6		4		0		0		0		0		9		5		0		0		6		8		19		7		2		0			6		0			0		5		6		6		0		85
2		4		0		0		0		4		0		5		0		0		8		4		28		3		1		0			0		4			0		0		8		16		0		0
2		3		0		0		0		0		0		0		0		0		4		5		27		5		2		0			0		5			0		0		5		0		0		0
9		6		0		0		0		5		0		6		0		0		6		9		25		4		2		0			0		7			0		0		1		10		0		0
6		6		0		0		0		0		0		6		0		0		5		10		23		5		1		0			0		5			10		0		1		5		0		96
0		4		0		10		0		0		0		0		9		0		0		8		20		8		1		0			0		4			0		7		4		0		0		73
7		3		0		2		0		0		0		4		4		0		0		4		29		5		1		0			0		5			0		3		0		6		10		0
6		10		0		0		0		6		0		10		6		0		0		9		26		5		1		0			6		4			0		0		3		0		0		0
9		6		0		0		0		8		0		2		0		0		5		14		24		3		2		0			0		3			0		7		4		0		0		84
5		10		0		0		0		4		0		13		0		0		3		8		24		2		1		0			0		2			6		5		9		0		6		0
11		4		0		0		0		0		0		5		0		0		6		7		24		6		4		0			12		3			0		0		8		6		0		0
9		10		0		0		0		0		5		6		8		0		5		5		27		3		2		0			0		3			0		0		6		10		0		0
5		3		0		0		0		0		0		8		0		0		4		5		26		4		3		0			20		4			0		0		6		0		0		0
3		7		0		0		0		0		0		3		3		0		0		6		31		7		1		0			0		1			0		3		8		0		6		101
4		7		0		0		0		6		0		9		0		0		7		7		22		3		2		0			12		6			16		1		3		6		0		0
3		2		0		7		0		0		0		0		0		0		6		11		32		4		2		0			0		2			0		0		7		10		0		83
5		7		0		3		0		5		0		0		0		0		9		9		29		6		2		0			0		3			0		0		4		0		5		0
1		1		0		0		0		13		0		9		0		0		7		9		23		9		0		0			5		3			0		0		9		10		0		79
3		5		0		0		0		0		0		5		0		0		9		9		26		5		3		0			0		5			0		0		6		16		10		87
0		8		0		3		0		1		0		8		0		0		4		5		23		5		2		0			4		6			0		5		4		0		0		0
5		1		0		0		0		6		0		4		9		0		10		8		15		5		3		0			0		5			0		0		8		6		0		0
7		5		0		0		0		0		0		3		0		0		4		4		23		3		1		0			0		4			0		0		3		0		0		0
5		5		0		0		0		0		0		4		0		0		11		6		27		5		4		0			10		4			0		0		5		6		6		0
7		6		0		0		0		7		0		8		0		0		2		10		28		3		3		0			9		3			0		0		4		10		0		0
5		10		0		0		0		0		0		5		0		0		0		5		27		7		3		0			0		7			0		0		4		0		0		84
8		4		6		0		0		3		0		9		0		0		4		10		24		5		1		0			26		5			6		0		4		0		10		0
0		8		0		5		3		0		15		6		0		0		0		7		22		5		3		0			5		5			0		0		9		6		0		0
6		10		0		0		0		8		0		7		3		0		5		8		27		6		1		0			0		3			0		0		9		6		5		0
8		6		0		0		0		0		9		11		0		0		5		4		29		6		1		0			3		3			0		11		8		6		6		0
7		3		0		0		0		5		0		9		0		0		7		8		20		7		4		0			13		4			0		0		7		6		5		0
4		2		0		0		0		3		5		0		3		0		6		8		28		10		3		0			12		4			0		0		7		0		0		0
[truncated: 108,004 more rows]
[truncated: 8 more columns]
