# Supplementary material for: An analog to digital converter controls bistable transfer competence development of a widespread bacterial integrative and conjugative element
Source: eLife. 2020 Jul 28;9:e57915. doi: 10.7554/eLife.57915 (PMC7423338; doi:10.7554/eLife.57915)
Supplement: Figure 7—source data 1. [file elife-57915-fig7-data1.xlsx]

## Sheet: Feuil1
6062	IPTG	fluo	N	background	%active	mean active	mean active-back	sd active	mean non active	mean non active-back	sd non active	Max value	Max-background	folder
Pint-echerry/PinrR-egfp	0	red	2297	377	3.5	424	47	7	393	16	11	460	83	20180525
		green	2297	360	9.7	424	64	31	378	18	9	560	200
	0.002	red	3222	372	3.3	433	61	101	389	17	10	1180	808
		green	3222	357	9.8	418	61	28	376	19	10	544	187
	0.004	red	2348	375	8.7	547	172	214	390	15	11	1470	1095
		green	2348	361	13.6	425	64	30	381	20	9	550	189
	0.006	red	2659	376	23.4	635	259	285	392	16	11	2140	1764
		green	2659	355	14.9	424	69	28	373	18	8	590	235
	0.008	red	2295	383	49.4	718	335	308	394	11	13	2180	1797
		green	2673	356	33.3	429	73	31	375	19	10	640	284
	0.01	red	738	393	60.3	976	583	380	397	4	14	2030	1637
		green	1727	363	48.7	454	91	40	379	16	11	630	267
	0.012	red	662	394	71	1018	624	428	393	-1	15	2870	2476
		green	1918	357	51.5	455	98	48	372	15	11	670	313
	0.015	red	767	394	74.8	1215	821	449	393	-1	13	3150	2756
		green	1467	357	66.4	453	96	43	374	17	11	660	303
	0.02	red	1355	411	87.9	1351	940	470	402	-9	20	3420	3009
		green	1776	357	80.1	466	109	52	374	17	12	760	403
	0.03	red	1585	412	90.9	1438	1026	541	398	-14	19	4220	3808
		green	1585	356	80.4	468	112	57	377	21	12	760	404
	0.04	red	2078	436	91.2	1553	1117	573	408	-28	25	4400	3964
		green	2215	359	84	495	136	68	376	17	13	900	541
	0.05	red	1017	404	96.1	1417	1013	495	399	-5	20	5100	4696
		green	1017	355	92.2	471	116	53	376	21	12	810	455
6062	IPTG	fluo	N	background	%active	mean active	mean active-back	sd active	mean non active	mean non active-back	sd non active	Max value	Max-background	folder
Pint-echerry/PinrR-egfp	0	red	1571	368	1.7	413	45	4	383	15	10	430	62	20180605
		green	1571	345	0.8	395	50	14	357	12	8	430	85
	0.002	red	1237	367	2.3	427	60	40	383	16	10	580	213
		green	1237	346	5.8	398	52	16	362	16	9	460	114
	0.004	red	1796	373	8.9	636	263	228	387	14	11	1480	1107
		green	1796	351	3.2	416	65	25	361	10	7	500	149
	0.006	red	1375	375	24.9	776	0	360	388	13	12	2130	1755
		green	1375	350	17.3	433	83	41	366	16	8	660	310
	0.008	red	1004	377	50.8	795	418	312	388	11	13	2190	1813
		green	1089	349	37.1	429	80	34	365	16	10	630	281
	0.01	red	1008	390	67.5	907	517	317	391	1	15	2830	2440
		green	1945	351	49.3	437	86	37	363	12	12	610	259
	0.012	red	952	400	71.3	942	542	318	392	-8	15	2530	2130
		green	2927	352	53.4	444	92	42	361	9	13	780	428
	0.015	red	1305	386	90	826	440	231	390	4	16	1820	1434
		green	2042	350	75.5	444	94	42	368	18	14	780	430
	0.02	red	1400	405	96.4	1223	818	357	400	-5	20	3720	3315
		green	1665	352	88.7	477	125	53	370	18	13	720	368
	0.03	red	454	384	92.7	1030	646	320	386	2	14	2950	2566
		green	952	350	87.6	481	131	58	365	15	14	740	390
	0.04	red	1202	402	98.7	1141	739	322	404	2	24	3140	2738
		green	1610	352	91.1	471	119	54	374	22	12	760	408
	0.05	red	554	385	91.2	1150	765	454	387	2	16	4300	3915
		green	1003	348	84.4	473	125	64	366	18	13	940	592
6062	IPTG	fluo	N	background	%active	mean active	mean active-back	sd active	mean non active	mean non active-back	sd non active	Max value	Max-background	folder
Pint-echerry/PinrR-egfp	0	red	2876	369	1.6	413	44	4	384	15	11	420	51	20180605
		green	2876	348	1.3	394	46	7	364	16	8	430	82
	0.002	red	2619	368	0.5	471	103	68	375	7	9	610	242
		green	2619	345	0.7	405	60	24	349	4	5	470	125
	0.004	red	1384	369	9.5	568	199	182	383	14	11	1350	981
		green	1384	346	7.9	420	74	30	364	18	8	540	194
	0.006	red	2341	370	21	579	0	169	377	7	10	1400	1030
		green	2341	346	12.3	421	75	30	354	8	9	550	204
	0.008	red	1731	371	37.5	611	240	177	378	7	11	1530	1159
		green	1731	346	24.6	429	83	40	355	9	11	720	374
	0.01	red	1196	379	66.8	903	524	290	384	5	12	2240	1861
		green	1472	347	58.3	457	110	48	359	12	11	710	363
	0.012	red	1115	390	62.6	697	307	187	397	7	14	1670	1280
		green	1432	361	46.9	445	84	37	372	11	13	660	299
	0.015	red	780	418	90.9	1198	780	395	404	-14	21	2620	2202
		green	1684	355	84.9	502	147	76	366	11	17	880	525
	0.02	red	1754	401	90.9	1011	610	326	395	-6	19	3550	3149
		green	2565	352	81.7	463	111	52	366	14	16	770	418
	0.03	red	1443	387	94.2	829	442	218	388	1	16	2510	2123
		green	1559	351	85.9	466	115	52	369	18	15	740	389
	0.04	red	665	382	96.8	904	522	261	381	-1	14	2340	1958
		green	1068	350	91.5	491	141	63	367	17	13	730	380
	0.05	red	1423	402	97.6	1281	879	336	392	-10	22	2790	2388
		green	1577	353	93.8	546	193	87	370	17	15	920	567
