# Supplementary material for: An analog to digital converter controls bistable transfer competence development of a widespread bacterial integrative and conjugative element
Source: eLife. 2020 Jul 28;9:e57915. doi: 10.7554/eLife.57915 (PMC7423338; doi:10.7554/eLife.57915)
Supplement: Figure 7—source data 2. [file elife-57915-fig7-data2.xlsx]

## Sheet: eCherry Fluo
IPTG mM
0	0.004	0.006	0.006	0.008	0.008	0.01	0.012	0.015	0.015	0.02
8.78261	7.68116	2.42029	31.2029	8.63768	238	380.986	694.261	596.754	1106.43	1301.64
5.82609	22.4348	29.3188	9.18841	584	2.33333	910	434.377	184.101	1231.64	702.696
22.5362	84.3623	355.565	20.0725	450.232	453.348	449.522	453.768	789.348	776.29	1046.06
2.04348	3.78261	4.57971	18.3478	496.029	6.66667	4.75362	22.1594	395.435	1164.33	855.116
15.7391	4.37681	2.71014	17.5362	18.7536	20.5507	1775.46	696.565	1045.64	1136.23	553.449
15.3768	15.2609	1.53623	31.8986	178.188	12.3623	4.13043	562.942	506.246	681.899	698.913
2.7971	2.82609	6.95652	31.3043	783.957	2.56522	975.072	16.8696	566.333	582.71	545.638
19.6377	330.014	9.01449	27.7971	14.6957	4.57971	33.5072	901.362	2.88406	1260.23	1082.03
14.3768	28.6232	5.68116	37.2754	15.3768	12.7971	1405.07	989.681	928.087	614.13	1237.59
28.5072	10.9565	17.4348	32.5652	17.8551	8.53623	6.76812	867.275	621.507	783.638	1010.14
32.7971	16.8261	4.23188	12.9565	37.8841	5.91304	30.058	1058.38	331.681	18.6667	830.812
21.1739	22.6232	14.6957	31.6667	2.37681	6.89855	1290.67	6.08696	750.014	739.971	736.072
15.6957	43.5217	23.7971	1887.22	10.3768	13.3913	828.493	12.087	462	1092.25	1803.42
26.4058	15.2899	8.02899	18.3333	18.8696	3.05797	5.85507	824.101	631.58	637.478	773.304
35.2319	19.4928	9.46377	12.087	640.275	14.5652	33.8116	701.319	8.46377	1102.39	452.928
20.4493	19.8406	111.072	1114.46	38.6232	17.8406	12.8841	346.362	983.493	1321.64	1002.77
21.7101	18.5362	32.5217	9.17391	17.2464	514.13	758.42	11.8986	766.304	1069.68	1110.01
19.5942	21.2754	3.68116	387.101	27.2029	634.986	1029.62	843.899	1498.65	1105.59	1007.1
37.8986	25.5072	617.884	2.2029	593.71	705.333	22.087	1268.57	983.087	743.87	807.42
15.4203	26.2899	420	22	21.6522	13.5797	818.594	6.49275	422.667	1423.06	793.116
32.5362	18.4493	33.4928	10.1159	17.8116	16.1014	799.725	36.2319	624.275	1749.36	1540.19
23.7971	25.971	11.6522	10.6667	15.3913	4.15942	1043.2	572.319	1241.67	5.36232	447.884
13.5072	28.4348	4.95652	5.69565	31.7971	25.9275	34.9565	16.9275	2.97101	903.725	498.638
37.5797	24.6957	171.928	1.73913	1339.03	14.0145	135.667	1092.8	882.188	1097.22	856.116
30.6667	17.2754	13.6087	15.2754	56.9565	360.464	40.3478	851.551	31.1594	1338	1064.12
12.8986	7.17391	13.1884	11.7536	49.3913	19.0725	2422.26	942.116	512.899	520.101	709.449
30.3188	46.4493	13.1739	10.5217	37.3333	17.1449	763.652	1566.07	664.493	1282.71	1019.59
35.087	9.86957	15.6087	13.0435	29.3623	18.1739	27.5942	1118.36	701.261	1567.75	885.42
13.2174	24.942	14.942	377.29	217.188	11.4348	1223.06	785.014	371.188	2930.19	636.29
15.058	13.9275	7.55072	28.4783	925.971	18.7536	933.217	16.2754	869.522	1059.35	775.928
14.5797	24.5942	17.2899	3.18841	27.5652	77.8841	1016.57	703.159	490.304	822.391	901.855
11	39.7971	13.7826	6.33333	34.4783	17.971	852.899	9.78261	801.261	742.304	670.072
18.7681	19.3623	6.76812	37.3623	265.812	16.6522	29.7391	47.8986	690.768	1163.04	1374.16
24.9855	13.6522	15.5652	19.3188	11.6957	15.4783	1382.8	941.812	401.957	1109	800.145
24.3913	47.3623	589.971	43.5652	41.6957	11.058	151.13	30.4203	1270.32	2422.35	249
15.6377	33.4348	13	29.6812	10.6812	585.884	27.971	1822.13	915.217	1550.91	921.725
4.95652	27.4348	303.609	27.5652	330.145	347.609	858.478	1540.74	689.899	1689.55	598.101
7.65217	28.6377	20.0725	28.1159	6.2029	11.9275	1125.26	1525.84	373.928	736.449	1001.59
10.5072	29.8116	423.29	21.6232	7.27536	15.4348	24.5217	1127.75	1200.04	1649.71	643.783
2.81159	34.4638	1.33333	53.2029	260.232	15.5362	1506.28	1226.52	1334.58	1102.64	863.899
1.85507	22.3623	15.0145	27.7536	38.942	291.551	27.1304	1839.49	980.71	8.30435	963.232
7.56522	33.8696	18.0435	918.797	12.6957	1.84058	22.3043	8.46377	771.246	922.203	1073.3
6.4058	40.4058	14.4638	31.0725	40.5507	281.014	520.725	985.58	458.319	1246.88	1461.13
6.04348	20.3913	9.13043	13.8116	24.2319	34.5797	837.188	22.3043	491.87	36.5072	242.246
3.72464	24.6522	12.2754	20.058	970.319	1.23188	1401.96	786.725	71.1304	1661.12	962.203
10.7101	53.4928	11.7826	32.5942	13.2899	434.029	14.2754	2551.03	19.6812	2034.74	1651.72
9.69565	3.94203	12.9565	26.2899	682.725	551.87	9.7971	25.7536	11.6087	2983.19	765.826
8.55072	23.8696	11.8551	424.899	6.62319	622.797	19.8696	8.89855	695.812	1747.41	1605.54
6.47826	3.81159	164.232	27.913	40.7246	1.2029	21.5507	997.348	721.043	987.377	1455.61
9.84058	20.3768	257.188	32.1884	16.8986	8.37681	936.855	11.6377	747.116	611.609	1359.88
4.69565	19.3768	21.1449	20.8986	785.957	4.52174	808.841	597.797	885.826	767.058	1427.77
6.63768	17.5942	6.02899	16.4638	15.1304	825.986	735.754	971.014	1007.48	3016.55	1213.86
23.7826	22.2174	11.913	21.6522	8.78261	49.7681	828.116	933.449	370.304	1433.49	935.986
13.5797	10.2899	14.2029	8.55072	60.1594	292.116	9.95652	1320.62	581.58	1435.51	1033.06
6.18841	19.4348	1003.71	29.029	19.0725	111.464	484.232	36.7826	704.986	20.1304	1675.22
10.2754	24.6812	13.2174	551.855	7.46377	12.5362	962.797	1721.42	423.71	1252	1295.07
11.5362	26.1014	26.6522	17.6957	34.8696	17.942	21.3188	1592.07	486	1718.91	1022.2
15.7826	27.5217	1.55072	27.1159	33	10.3478	1495.83	2.47826	734.232	975.942	740.362
23.6667	5.98551	40.942	18.2754	25.1594	17.7536	892.043	1449.22	461.29	809.058	978.594
3.08696	12.3478	10.4203	15.5362	659.261	22.5217	614.391	902.304	476.435	1568.58	1353.46
10.1159	19.1304	745.087	161.623	12.4928	24.8116	18.6957	913.42	303.072	1293.2	445.304
8.27536	14.971	5.75362	2.34783	24.5652	39.913	667.899	738.797	842.058	1225.43	1200.75
5.43478	13.1159	8.97101	396.159	32.6087	6.95652	1522.9	999.812	413.188	2086.72	1052.93
11.7971	17.6667	18.2464	4.71014	11.8841	74.4928	717.217	31.1159	317.275	10.7536	1566.3
15.5942	9.2029	65.8116	31.5797	13.2609	32.058	245.986	12.3913	338.681	765.725	1442.62
12.2899	14.5507	9.88406	21.7391	29.3333	12.4783	684.145	9.4058	2.23188	1531.78	966.899
7.17391	29.7536	40.5362	524.304	513.884	238.652	468.768	837.464	17.9275	1275.52	923.957
15.4493	4.50725	10.5072	9.11594	524.188	468.174	4.98551	22.942	639.043	1222.35	2354.45
13.1304	20.4783	15.7826	9.5942	57.1449	11.9855	529.507	847.899	664.522	922.638	508.536
19.3333	24.5507	14.2754	6.65217	789.536	9.98551	399.449	43.7681	171.261	1333.7	728.391
9.92754	30.5217	15.3188	10.4493	9.65217	75.971	729.188	2.91304	556.609	516.754	2925.22
27.3913	20.3188	14.6377	5.73913	915.29	16.3188	336.87	479.913	555.826	818.565	1183.93
15.9855	16.4928	3.4058	2.91304	1.65217	582.116	625.362	564.188	13.4783	573.406	1859.39
13.7391	13.087	825.043	1.08696	13.4638	1017.3	7.49275	577.971	1125.87	9.97101	952.667
7.76812	31.4058	15.5507	76.5652	5.72464	822.536	4.31884	1588.45	938.348	1359.96	792.101
24.4203	34.2464	13.5652	22.7391	18.5362	12.029	502.145	623.725	327.71	1403.9	945.884
23.1739	18.8551	16.6957	2.84058	303.246	7.6087	1353.23	10.5507	470	2219.09	435.725
15.0145	25.3623	13.3478	14.5217	7.84058	25.7536	433.87	21.6957	175.014	1179.42	1013.77
3.52174	20.4493	1.21739	16.6522	10.029	23.3913	563.116	23.8406	391	930.522	462.507
20.0725	29.6232	36.2319	16.9855	12.8841	433.072	364.739	30.5072	704.609	1513	1110.13
17.913	77.5217	3.2029	1233.14	10.4058	12.7101	23.1159	20.4783	607.536	1292.9	2051
14.2609	27.8261	598.957	172.217	25.9565	13.5362	19.3333	437.478	164.913	1315.29	1249.57
12.5797	14.7971	1.15942	7.53623	373.058	1080.49	507.899	1172.62	141.783	1160.96	1161.83
19.1449	2.10145	8.2029	4.01449	490.435	8.01449	20.3478	9.68116	504.203	629.957	907.493
19.8696	37.2029	5.2029	9.37681	1163.03	7.56522	389.087	1058.77	315.391	1256.61	975.594
21.4638	18.1449	10.7826	17.7246	17.5507	13.2319	20.087	3.66667	371.855	876.986	819.406
11.8116	28.6957	4.56522	2.52174	29.3478	13.7971	16.8986	1611.77	532.304	1142.04	897.145
10.9855	5.14493	15.1159	351.797	448.42	575.797	8.94203	15.1594	919.377	1204.84	1007.59
2.81159	10.2319	12.6812	9.31884	15.3913	596.261	744.348	511.957	521.145	1308.22	1456.14
19.8696	18.6522	1013.58	27.8116	951.391	8.97101	1293.01	1287.96	585.594	1225.45	912.551
15.6232	10.5652	2.91304	10.5507	11.2319	320.333	1094.22	6.24638	409.667	1413.96	1015.57
40.1159	7.95652	85.942	756.232	429.275	883.58	840.942	44.1159	279.101	3738.07	1008.19
10	30.6232	297.594	34.6667	19.8696	493.072	1284.57	1148.01	186.304	1360.13	717.522
21.2174	11.1159	29.7101	866.87	29.9855	965.522	1.08696	865.072	292.623	1916.43	770.145
8.26087	144.725	9.18841	862.145	1364.78	367.913	150.754	316.681	401.971	1955.46	1065.68
25.0145	7.98551	11.6812	8.49275	30.9565	32.2319	3.11594	754.797	447.203	968.246	975.42
7.84058	12.942	4.88406	557.333	2058.81	63.6957	15.8406	616.565	376.275	1316.97	1024.93
19.4928	1.43478	10.6812	22.8841	412.333	298.594	339.783	1491.45	431.391	245.377	973.435
12.3043	15.2174	1.52174	388.638	33.2464	10.087	683.71	1343.12	624.638	1593.9	1340.78
14.5507	10.8116	13.9855	46.7826	793.71	3.98551	324.681	108.232	534.188	1582.12	1355.51
6.44928	13.3188	4.62319	5.18841	1327.25	621.377	4.30435	910.928	501.043	460.217	566.565
5.7971	8.76812	2.5942	30.0435	716.899	26.6812	9.23188	648.217	471.652	7.49275	1358.33
9.78261	16.0725	51.029	1122.57	17.3913	12.5217	5.46377	3.44928	503.826	1225.88	1056.59
12.1884	46.087	76.3623	34.8551	26.4928	7.65217	1212.81	2032.52	821.29	1768.41	1109.45
1.95652	774.957	7.6087	836.507	21.7536	432.275	133.246	2464.57	15.7536	1041.61	1177.71
8.85507	42.1159	14.9855	3.08696	605.797	589.58	19.3768	14.6232	825.899	605.348	1020.49
15	31.2899	11.2899	32.3913	10.1594	25.6232	699.739	13.9855	555.275	1077.65	913.203
12.4203	20.3478	4.23188	31.6812	80.2899	8.42029	432.87	1141.75	488.159	341.145	576.957
12.5652	30.2609	8.2029	27.2754	731.174	1021.54	9.5942	1287.36	137.928	1742.32	1358.39
14.6232	7.52174	11.2174	41.5507	114.014	29.5797	14.2029	1611	346.522	1871.06	992.203
7.36232	8.62319	9	1018.07	22.7246	669.812	15.4058	1097.97	105.826	1171.94	965.406
3.52174	31.058	123.261	28.0145	40.5217	723.145	760.493	178.536	402.478	688.116	1046.22
6.02899	40.1304	258.232	1512.23	368.029	16.087	10.0145	908.058	589.681	885.986	838.942
2.08696	29.6377	13.1014	6.3913	24.1594	12.0435	1431.54	881.986	466.232	724.101	2130.88
8.11594	50.9275	10.7971	8.71014	12.971	22.971	21.1739	11.3768	1.46377	1939.19	1061.78
10.1739	33.1739	17.1159	26.0725	15.7391	20.942	4.01449	24.4348	601.841	1048.06	580.072
4	19.3333	4.84058	276.101	179.638	20.3913	45.6522	1078.01	62.3623	950.986	1029.8
6.73913	20.5217	8.6087	31.029	79.7971	90.9275	384.826	1245.93	463.188	1979.38	1076.54
30.2319	25.029	17.1449	7.68116	2.13043	20.5507	8.30435	711.333	711.638	1401.52	1684.2
17.058	23.6522	20.2319	1515.87	12.4493	9.31884	844.884	2134.75	252.507	1089.39	898.188
8.15942	14.8986	10.3043	140.696	4.62319	9.71014	825.638	613.638	391.841	1698.36	1211.17
18.5507	965.812	7.5942	36.3333	17.7391	6.05797	836.783	559.681	497.884	1073.29	1479.88
9.98551	16.4348	9.44928	44.2899	136	12.1594	593.072	738.681	195.855	52.5797	545.087
13.3623	24.7681	3.94203	4.86957	598.029	9.07246	313.145	729.609	213.928	1336.52	761.696
24.0435	41	14.5942	22.5362	480.029	746.725	296.522	848.493	195.667	1610.22	640.565
19.6667	27.3478	74.4348	1.81159	20.6087	42.8116	290.667	6.11594	239.014	7.72464	1287.78
11.3333	29.1159	11.2754	27.8696	508.594	6.3913	2.10145	783.188	350.203	1726.86	1272.38
24.8551	6.68116	23.913	1650.55	778.812	21.5217	638.652	728.116	731.507	1450.84	812.58
29.087	14.5362	62.4493	25.7536	18.5652	20.8406	477.029	456.551	673.377	1628.96	643.899
12.5942	30.5217	19.6232	1203.99	839.029	449.188	1156.17	212.812	340.377	1221.65	1460.7
23.0725	7.31884	17.4058	13.1594	13.942	60.1594	456.275	674.391	181.884	1848.36	1713.12
23.2174	30.7681	18.2174	16.6522	25.3478	5.43478	37.971	1282.93	955.681	1450.28	719.043
20.8986	36.2609	15.4348	22.1014	72.029	9.27536	227.667	573.739	727.391	3076.62	1124.25
12.6087	21.971	6.27536	36.2609	43.6377	7.30435	578.725	1064.22	12.2899	1661.83	1411.58
40.4638	27.2899	13.1159	22.9275	53.3913	5.46377	564.913	726.406	434.725	817.217	1668.51
22.913	24.0725	20.8406	150.87	796.609	670.362	516.261	1538.43	547.188	13.0435	1682.38
19.8696	11.8261	4.01449	2.13043	37.3333	6.62319	13.2319	12.9855	291.623	1112.42	25.7681
15.3623	12.8551	24.3478	24.6377	662.203	10.3478	367.725	490.768	84.2899	1609.35	1266.75
25.8551	18.3768	15.0725	13.4493	28.1884	4.91304	364.072	19.4928	7.57971	36.8551	816.855
21.3913	11.2174	3.10145	4.49275	20.6232	369.42	8.4058	1199.91	488.826	669.928	360.681
17.8841	27.4493	273.58	18.9275	872.435	80.7681	588.304	5.81159	939.159	1431.91	1357.1
13.3188	49.0435	10.4203	1257.8	2086.38	2.7971	317.522	17.4203	735.522	730.116	836.913
27.2174	19.1159	14.9855	5.6087	19.8841	127.623	517.406	1098.57	19.9565	1663.03	1551.62
53.4348	79.3478	16.8261	407.87	29.3623	15.1739	242.348	548.797	304.435	1226.93	935.536
29.7536	19.7971	8.63768	1088.65	1110.86	9.63768	270.71	1540.93	30.8696	1.52174	848.971
34.6377	8.65217	12.9275	1480.25	34.2029	14.2319	5.27536	870.841	174.507	1835.67	1218.23
27.087	13.1304	23.5072	25.9275	1327.72	1.50725	241.696	1369.38	101.478	1835.45	1430.26
15.1594	7.84058	2.68116	19.3478	81.4928	19.2464	646.942	864.333	461.609	1616	916.58
42.2899	2.92754	9.63768	19.942	568.159	9.01449	1022.32	369.783	933.971	742.855	653.362
33.5507	23.1159	13.6087	18.8696	23.5217	206.406	3.13043	734.551	74.8696	1541.01	579.232
19.7101	3.52174	1.98551	22.4783	23	9.02899	461.797	444.623	229.246	696.522	716.391
30.7101	13.3768	13.7826	13.3623	2.92754	12.9565	650.072	1953.22	672.449	1352.72	1627.04
9.42029	10.7971	17.3623	7.36232	1835.25	4.94203	5.2029	942.261	688.464	887.319	675.188
47.7246	33.1594	123.217	6.33333	1144.38	458.522	872.899	775.855	216.145	2101.48	1605.48
23.2609	9.04348	16.2319	10.3043	26.2464	671.609	20.3333	641.319	441.899	2421.59	1640.42
44.5652	22.6377	16	84.8116	21.1159	7.18841	888.739	30.9275	397.072	86.1159	969.652
52.5072	18.7681	9.18841	10.5942	695.377	16.6232	782.493	778.507	528.217	433.957	986.159
15.9275	30.6087	311.435	39.2464	4.15942	29.1739	244.768	733.116	740.188	100.623	1147.43
13.1014	26.4348	17.4348	16.6087	622.304	15.3768	228.058	675.014	392.768	297.145	1042.48
32.5797	29.942	18.5362	313.232	1.07246	412.493	845.507	30.1304	490.261	297.464	1180.62
30.942	30.1159	9.84058	18.0145	7.85507	710.797	236.565	817.333	95.1594	573.594	1487.13
26.4203	18.4203	18.7826	28.7536	15.4348	13.3768	1284.84	946.667	11.5507	54.0435	535.058
18.1159	22.2609	10.5507	30.1884	265.942	22.9855	14.7391	2264.41	193.754	218.855	906.333
40.3478	8.3913	16.3043	7.72464	864.797	20.2464	3.71014	21.5217	288.319	234.261	220.667
20.1014	304.638	10.7971	28.0145	22.6667	16.2464	1.47826	24.6087	505.377	11.2029	1129.75
33.4493	35.2319	12.3768	350.391	91.2899	152.043	207.058	1196.07	111.101	347.377	957.638
37	24.0435	3.89855	949.478	14.8841	263.13	423.812	736.42	431.348	305.725	1288.65
24.2029	23.6522	12.1884	37.8696	1023.9	309.841	1548.77	800.029	544.261	197.464	1191.59
51.4928	24.0435	12.6377	33.3623	43.2319	11.3478	13.4928	1746.36	411.986	208.42	2417.58
43.9565	23.9565	8.34783	34.3768	16.3623	12.8986	471.203	803.565	261.13	551.101	343.884
29.3478	365.812	32.3333	177.986	41	735.261	22.9565	841.565	553.319	680.203	1478.84
32.2609	51.5072	13.3043	31.4058	19.3623	9.66667	42.6812	448.478	960.145	259.333	1034.28
15.6377	14.087	112.275	26.1449	17.6957	12.2899	868.957	34.5507	10.1449	259.203	1670.26
7.47826	591.797	22.9275	22.8261	23.6232	83.942	47.1449	12.7826	701.899	264.333	804.928
42.8841	32.6667	9.44928	10.9855	766.739	699.522	940.087	1110.71	340.42	3.34783	992.565
11.8406	32.4638	14.971	29.1884	370.217	23.9275	5.85507	1074.57	6.55072	253.014	1119.71
16.4203	28.8116	6.04348	1054.09	37.0435	29.0725	19.2899	449.377	370.42	268.174	1288.32
17.058	20.058	12.9565	426.899	95.6522	496.507	638.754	7.66667	395.913	194.29	852.449
18.4638	25.1014	11.5507	297.261	5	548.029	7.68116	1579.26	442.942	13.0145	760.87
15.8696	27.058	5.33333	41.5942	18	14.7246	703.087	1149.45	377.768	281.101	1054.62
12.5362	37.0145	16.087	10.7971	25.2899	286.246	17.5362	23.2609	3.57971	317.348	1088.25
24.1594	29.9855	18.3768	38.6377	402.362	13.7826	11.942	23	16.1159	348.377	773.783
9.56522	17.2609	15.3478	50.5652	24.8986	39.8116	531.58	1125.13	457.71	212.362	783.42
35.4783	20.7681	5.08696	35.4058	19.2754	16.3333	394.783	8.72464	396.435	1057.46	739.899
21.7826	13.4638	6.94203	9.66667	25.3478	356.493	4.78261	427.638	833.261	826.696	692.812
13.1739	549.058	13.8551	27.4638	127.797	389.812	14.8406	1699.64	276.783	796.522	885.116
16.7971	17.5942	24.7826	21.029	26.7536	5.56522	1420.1	1177.61	494.217	530.014	764.652
31.2029	20.1014	5.10145	45.4058	25.8116	310.304	1341.75	25.4928	459.101	622.638	1223.54
30.1304	5.55072	18.1159	33.6377	26.8261	441.609	454.797	15.5652	1056.93	1144.06	649.348
30.1159	14.5942	12.4928	7.82609	1972.04	11.8551	140.203	596.594	634.261	947.304	1078.67
7.6087	6.50725	15.5652	49.4783	5.95652	1054.25	1326	12.3623	619.725	1067.19	1183.99
24.6232	44.029	11.5072	30.1159	1007.22	4.30435	1323.52	739.159	502.768	1234.65	726.754
15.4783	17.9855	17.4058	23.029	606.609	16.029	281.014	1020.65	922.435	657.362	793.768
19.4203	24.8116	391.507	20.913	36.7971	7.07246	25	16.0725	739.449	561.957	895.391
17.087	23.0725	11.3913	18.2174	28.7681	686.826	702.435	4.37681	1021.51	1126.14	693.304
30.7246	28.5072	86.1014	94.2754	29.1159	38.2609	23.5507	688.609	375.464	872.304	1120.75
9.04348	19.7826	19.4203	22.7971	517.449	9.46377	30.4348	890.652	263.42	856.101	667.986
23.6667	16.9275	11.2464	40.942	9.17391	17.0145	17.4493	4.50725	340.391	374.739	1459.26
35.6377	15.5072	17.4348	10.2899	9.02899	4.33333	18.5072	2027.91	392.667	1457.03	1232.59
23.6232	24.6812	19.2899	10.8551	1005.42	118.188	156.145	729.203	392.116	1151.38	1397.26
32.058	130.101	406.304	31.8696	1001.09	945.406	8.05797	1398.38	837.203	1473.97	755.826
14.2899	20.3188	20	29.5797	1147.57	256.971	951.493	3.82609	1119.94	882.304	1049.74
21.6957	29.5797	389.493	473.812	15.5652	14.5797	804.058	5.5942	366.638	766.58	1058.65
22.7681	14.6667	215.435	12.3913	414.362	19.7101	198.58	829.754	959.957	1661.57	797.203
25.3478	8.6087	141.826	43.087	29.7391	9.81159	392.435	377.058	800.159	902.652	2307.57
9.33333	17.2029	280.551	32.8261	8.05797	8.69565	15.5652	774.986	970.855	907.406	722.42
13.5942	11.2899	103.232	183.058	18.4348	14.029	513.42	512.957	879.101	8.69565	2376.23
21.1304	21.3188	665.507	26.1739	435.087	192.797	17	507.855	667.377	1394.46	900.043
8.3913	27.6812	228.348	18.6377	19.2899	9.44928	18.1014	609.13	681.449	1132.58	2731.97
3.08696	5.53623	8.47826	40.1014	91.2174	14.4203	1.21739	3.88406	5.7971	822.739	1476.41
18.9565	20.8116	8.73913	29.7681	987.145	299.362	559.783	16.2754	9.72464	717.072	1240.65
18.4783	7.85507	4.17391	23.4203	23.3478	87.4493	627.203	10.8841	672.87	922.797	1317.71
16.1594	9.57971	4.92754	19.942	1116.49	13.7246	723.319	654.203	886.391	978.275	1262.22
16.5362	17.8261	15.0145	21	16	73.8841	624.768	15.1014	273.116	896.174	2025.67
28.2609	14.4203	4.53623	12.6957	7	8.65217	737	554.217	19.029	1479.91	822.638
29.7971	23.1014	7.63768	10.2319	18.3478	5.55072	732.522	1154.88	400.652	1806.19	631.391
20.3043	10.8841	13.6522	24.3913	345.072	14.087	494.493	1789.51	378.667	871.391	1764.74
17.3333	23.7681	14.5942	39.3333	7.4058	12.0725	209.884	787.145	427.014	1524.39	1971.09
21.9855	11.2029	14.7826	7.62319	8	13.0725	611.942	519.942	295.638	1577.51	996.072
34.087	13.2899	12.6087	22.7971	672.971	9.97101	10.4638	602.826	15.4783	1246.43	696.304
19.6377	6.91304	8.78261	77.6087	11.3478	7.98551	1631.84	11.0145	576.986	1107.48	344.986
19.4348	12.8261	757.884	32.3188	455.971	17.3333	749.783	835.42	445.13	686.348	1126.77
33.0435	6.49275	16.7101	1088.29	798.116	82.913	12.2174	507.014	133.304	517.507	1779.51
19.971	17.6957	12.7246	16.5942	1699.48	251.29	22.1449	633.623	903.58	1203.06	1860.23
33.2029	10.058	8.46377	26.1159	17.3913	10.2029	844.536	728.841	392.275	1056.86	744.391
2.33333	530.522	12.9565	14.9565	80.2899	1.65217	8.68116	670.536	485.971	513.58	1489.7
6.78261	13.4928	12.058	29.4638	24.6667	171.826	8.88406	1021.93	225.348	758.928	519.783
7.42029	11.1159	3	7.07246	986.116	14.4203	674.362	1098.64	9.36232	648.725	1427.3
11.913	36.0725	15.6087	24.6812	1507.84	3.97101	386.145	372.594	336.696	992.13	1239.84
19.058	73.3478	16	11.1884	38.2609	18.1884	457.913	17.2464	405.681	764	828.551
16.6957	20.0145	1.18841	435.072	28.8551	9.57971	826.928	12.4928	221.652	1836.01	1307.83
27.7536	4.4058	23.7681	18.8841	994.986	68.3333	843.609	1100.14	9.02899	1935.33	703.304
21.3913	20.2609	21.0145	18.5942	18.8406	11.5362	10.4928	1.82609	196.188	1851.09	1006.17
22.4058	19.1014	16.3768	321.826	15.6812	23	450.391	492.536	389.812	2087.83	697.754
23.6087	22.029	11.8551	15.1449	29.0435	11.6957	2.69565	502.638	382.652	926.362	1284.1
17.4058	27.7101	6.97101	21.2319	17.3478	11	16.6232	451.159	368.942	1098.59	900.899
53	25.2319	17.6957	635.681	60.3913	15.8261	1059.49	451.261	672.638	1205.94	1063.51
22.3768	26.8406	5.24638	5.26087	303.449	175.986	5.11594	472.783	579.377	1377.84	1293.52
14.029	36.5217	13.9275	25.1014	25.7101	25.5362	39.2899	872.986	845.725	1228.78	1141.04
14.4638	34	425.986	37.7681	36.5652	18.058	1632.43	17.5942	938.043	1556.87	1024.39
9.84058	40.7826	96.1159	18.7391	1183.3	20.913	25.8116	746.696	525.464	1566.38	737.232
25.6957	30.2174	14.1304	17.3043	525.493	11.2754	687.116	716.609	167.42	3267.07	399.391
12.5507	4	12.1594	10.913	24.4348	18.3333	36.7391	407.652	2.28986	44.8261	1106.75
37.087	42.3768	6.72464	4.05797	41.5072	14.913	569.986	943.841	540.391	1355.17	875.536
35.7101	29.5507	5.92754	24.3478	16.6087	28.913	28.3188	845.043	574.304	946.116	764.217
4.56522	24.1594	17.5507	37.7971	1186.58	87.9565	297.71	510.87	752.58	392.203	1051.55
28.9275	31.2754	480.406	18.7536	12.1159	3.81159	2054.91	216.391	589.652	1642.91	1070.06
24.1884	20.7536	6.89855	33.2029	43.1884	45.2464	680.391	16.8986	553.957	580.768	15.5942
26.5217	40.2609	23.1739	11.6812	24.3478	51.1739	20.2609	10.6087	892.957	1180.64	1033.74
16.7536	13.2029	17.2319	27.0145	1067.83	7.18841	37.0145	627.594	400.043	1154.51	870.174
45.5507	17.0725	70.8116	436.594	24.5072	13.029	667.841	741.478	925.203	724.261	1054.96
19.6957	39.3478	10.1594	8.57971	25.4058	589.058	44.8406	1413.52	936.826	714.348	1279.55
57.7826	16.3623	13.029	10.6957	25.7681	12.6957	1323.96	251.928	860.348	911.681	1676.87
32.6232	23.6812	600.638	36.8116	607.768	416.333	29.2464	1.6087	436.072	986.232	1028.51
15.2174	31.7826	27.7391	2082.71	12.2609	80.087	17.4203	15.6667	627.913	929.986	945.188
11.8406	8.15942	12.3478	30.9275	386.333	1.82609	1396.33	541.391	449.522	1097.96	1154.72
26.3043	13.3913	7.52174	15.6522	7.23188	879.942	786.348	15.5942	451.884	1580.83	976.652
21.8261	260.942	10.058	48.1304	923.565	254.536	16.5217	6.89855	695.232	131.884	686.957
32.8696	23.5942	6.17391	2426.57	884.855	2.18841	509.986	1.24638	832.71	1099.51	1616.43
11.2609	22.2029	18.0435	56.4203	16.4203	94.8406	2065.84	389.101	740.029	1356.7	795.652
43.4928	10.5217	7.30435	8.82609	52.1594	8.94203	15.9565	4.63768	801.159	61.3188	1533.07
16.8841	7.10145	25.2464	38.2899	540.232	25.3333	51.3478	55.7826	891.246	1690.84	1020.3
45.6377	7.37681	14.3333	16.1594	36.1594	416.058	36.6957	7.69565	702.826	973.014	1203.72
4.57971	13.3333	19.087	12.9275	956.435	2.26087	41.6522	314.29	48.1739	1041.23	6.91304
28.8986	27.3333	356.957	697.812	38.0725	17.7101	27.2754	1586.9	523.406	3.76812	641.899
39.8986	13.5362	27.3333	42.029	585.246	17.2754	26.0435	1095.07	735.348	1323.94	1401.22
18.3768	8.23188	21.6377	36.4638	41.8261	14.4058	10.3043	24.1884	302.507	1393.16	2211.99
19.0145	18.7681	3.76812	20.1304	11.1159	12.087	1140.94	12.4928	1186.23	2105.17	1295.12
19.942	12.7246	13.0145	28.1304	802.087	13	837.768	12.0725	1188.48	1536.1	1207.48
20.087	20.6957	16.9565	28.3768	23.3333	8.26087	23.0435	1112.17	6.37681	721.754	1194.99
19.7391	32.6667	12.8116	50.971	8.76812	523.696	16.3913	679.435	3.36232	8.17391	2431.74
19.8551	9.21739	20.3913	922.841	21.6522	11.6522	855.826	1111.8	727.188	792.71	1740.84
26.6377	36.5072	8.84058	3.82609	27.9275	23.8986	1579.8	799.783	989.986	15.9275	1156.74
29.7246	20.4348	34.3043	1244.62	42.029	22.1739	910.623	33.058	1523.32	1289.93	2194.41
26.4638	20.913	8.27536	24.7391	49.7246	6.57971	1015.43	555.783	60.0145	1089.72	2294.59
30.8116	24.942	9.46377	35.8261	533.348	723.014	26.1014	12.7681	528	1065.93	1534.38
19.8261	12.029	17.2754	112.391	16.2464	19.6667	1021.09	587.957	1415.8	1081.09	1146.04
25.1884	6.42029	8.85507	40.5072	32.5652	337.043	15.1304	16.0145	490.812	1439.62	1018.91
6.42029	15.0435	17.1449	29.6667	701.623	71.4203	21.4783	241.087	1553.64	1493.3	1241.9
38.7101	10.3913	11.029	6.30435	33.7246	4.62319	7.37681	547	647.71	13.7391	1618.72
25.1449	25.3333	15.5942	39.913	29.7826	20.1159	22.8261	17.058	9.55072	755.261	2166.29
38.4783	19.9565	6.81159	25.5652	437.971	915.072	14.1594	22.4783	985.681	951.551	1408.58
33.0145	2.27536	15.3623	512.058	23.8116	8.76812	901.507	1172.67	2.11594	18.8406	1363.55
34.4203	17.3478	9.37681	9.98551	750.899	9.49275	1794.06	453.435	459.667	1012.25	1032.22
20.7101	23.9565	8.73913	19.942	999.841	6.73913	383.667	2.95652	2077.14	844.565	926.493
18.1014	7.52174	14.4058	85.1739	8.26087	16.3043	3.94203	7.4058	1782.83	1220.49	1014.06
27.6087	15.0435	428.116	12.5217	9.02899	6.84058	1324.43	180.986	461.478	942.696	958.275
35.0145	126.029	13.6812	4.63768	59.2464	5.88406	1394.62	3.42029	51.4638	1691.45	818.188
44.1014	29.0145	11.4783	6.91304	375.188	1.53623	4.6087	25.2754	1119.8	1390.78	1549.65
23.5217	37.0145	118.029	259.101	27.8116	89.7971	750.435	359.899	521.58	2554.25	524.261
22.7826	21.8406	13.3333	5.76812	21.3768	9.31884	13.7826	586.638	924.551	1350.39	642.696
33.4058	23.2754	16.2319	25.5942	28.8551	585.304	12.0725	412.754	1079.38	739.333	899.942
16.3188	43.1739	13.0725	25.1159	1178.61	22.5217	1387.78	700.043	883.333	218.29	838.609
37.2464	16.2319	62.7391	26	373.565	8.72464	1392.91	220.406	943.464	1573.59	1315.42
32.2899	22.4348	8.17391	29.8261	554.043	11.9565	775.014	9.17391	856.609	921.971	745.362
35.4348	28.5362	4.21739	3.08696	771.42	2.04348	1025.32	275.174	61.4348	902.667	1266.33
28.8841	40.1594	11.2029	18.5217	16.8841	14.2754	577.29	1327.35	1105.64	976.464	985.058
12.6812	34.4058	12.5362	36.3768	30.2029	85.971	771.493	662.362	576.71	1220.14	911.449
2.10145	33.6812	2.46377	398.565	1481	4.50725	399.449	885.754	1594.96	948.174	1005.39
2.94203	26.3623	9.49275	19.0145	1217.78	796.942	1095.94	508.58	966.449	1688.99	1238.14
7.91304	32.2174	44.6087	300.188	749.565	1.53623	1848.57	23.5797	804.319	816.043	1016
6.43478	31.2029	5.81159	1.01449	459.928	200.319	171.551	209.942	16.9275	1762.43	1334.36
5.10145	34.2609	15.9565	19.2174	242.768	5.24638	20.3333	240.391	1316.03	867.072	1086.01
22.6957	34.3188	22.5072	18.8116	363.957	10.6812	1144.48	38.8696	839.188	819.362	825.986
2.72464	35.3333	226.797	489.493	48.6522	12.7826	645.072	4.21739	490.188	2286.39	7.23188
26.6667	42.6957	3.72464	893.478	28.8116	7.23188	1937.9	767.478	1110.61	16.3623	597.681
14.3478	22.087	8.15942	466.42	979.536	62.2174	543.101	237.493	424.58	1040.28	1669.04
16.4203	19.5797	3.05797	5.7971	24.7246	11.2029	495.072	553.464	431.536	803.159	31
5.71014	25.5507	8.78261	6	76.7536	19.7391	327.203	981.159	480.971	317.145	1544.3
15.029	15.0435	8.27536	12.3333	1133.72	3.75362	826.551	432.058	1468.64	875.174	1583.81
18.6812	25.6812	6.43478	29.1594	280.957	14.1304	1265.26	19.4203	1133.64	867.391	2133.3
6.53623	667.565	11.9275	793.507	676.493	18.058	19.4928	27.029	1051.55	1097.16	656.246
10.5362	12.4638	702.203	453.246	737.13	7.4058	18.3913	630.043	559.594	735.478	1601.29
19.9855	22.6377	13.1594	1045.28	7.47826	285.42	933.42	419.304	880.449	940.275	1806.1
28	13.1739	19.8696	11.7681	271.246	2.36232	18.1449	674.145	942.058	812.681	1960.03
26.2464	30.5072	7.63768	4.86957	20.8406	12.8841	1131.84	14.5362	440.333	678.116	1889.71
19.5942	26.7971	11.2754	132.971	420.797	7.53623	589.333	1132.26	7.81159	1019.86	1827.84
14.4348	33.4493	296.261	22.8116	36.8551	115.957	1246.38	14.8406	210.029	634.826	1724.81
19.5652	26.3623	9.94203	28.1594	129.652	112.333	20.5507	5.42029	1112.97	45.5507	1384.01
14.3623	15.0145	264.551	23.4493	832.13	6.72464	1.47826	5.08696	1687.93	779.826	1335.48
23.8406	1.27536	21.2174	16.1304	359.667	9.42029	32.1014	996.217	1310.42	1681.51	2131.77
37.2174	2.42029	193.58	23.6087	11.6812	2.30435	1392.65	772.261	771.406	915.87	2174.52
25.2319	10.4928	4.24638	13.5217	1150.84	12.087	268.058	784.739	853.609	1057.04	1179.06
13.058	9.53623	13.2464	15.5217	684.246	15.6087	1126.93	1135.91	109.87	1070.78	944.333
21.1304	17.1594	5.07246	32.8841	509.232	2.50725	828.754	14.4203	1047.97	702.203	74.6957
6.47826	5.02899	6.53623	13.7536	29.5507	15.4058	1106.28	752.174	460.971	819.188	945.841
16.3913	18.3333	22.9855	23.7826	211.275	5.44928	536.783	373.319	1029.88	1967.8	1200.03
20.5652	9.17391	8.02899	30.1884	12.3913	7.33333	761.551	1051.88	19.7101	1242.94	2259.88
15.6522	19.1159	11.8261	1701.87	31.8696	156.783	956.652	5.24638	880.826	1048	1491.06
13.8986	15.7971	6.55072	8.15942	10.9855	166.609	658.13	336.739	586.536	769.652	950.507
14.3478	20.5507	15.3768	90.058	22.9855	337.754	1151.17	612.739	6.34783	1058.59	1772.96
29.9275	14.2899	19.4348	13.1594	23.5217	5.04348	789.029	16.3188	511.884	7.75362	2133.71
27.0435	19.6232	16.1594	1192.62	37.5217	702.42	33.5362	268.275	1033.83	1289.38	827.406
31.2464	33.8116	10.0145	30.8116	1202.45	154.957	894.449	362.841	593.87	752.58	1545.03
22.3768	35.8841	4.30435	27.2029	674.333	12.8986	1375.77	393.754	1023.97	1287.29	1604.97
19.913	7.11594	13.1159	13.6087	177.217	26.8551	48.5217	1280.26	669.478	372.116	1219.65
8.63768	24.942	21.3333	3.85507	55.3913	5.78261	48.6667	168.478	10.6087	849.174	1573.68
16.1449	36.6377	4.66667	21.2319	16.4348	8.98551	2380.78	888.696	357.188	974.957	1127.65
20.4928	30.8261	96.3043	24.4203	2167.07	429.362	35.3478	754.652	986.174	710	1474.29
17.5797	19.8986	9.94203	32.5797	1789.36	13.9565	159.58	847.261	863.42	1037.3	1557.17
29.6232	26.0145	15.4928	28.1159	949.957	614.217	2337.13	16.6812	840.797	894.464	1293.71
28.5362	102.87	23.5362	34.2609	21.1304	839.913	9.42029	796.986	1348.33	1041.26	1407.43
14.3478	29.7391	13.3188	21.5507	1397.54	251.638	36.3478	5.07246	1071.54	753.739	1021.75
28.913	20.5362	19.4348	18.7246	15.9565	11.1014	2428.45	40.3768	14.0145	977.087	771.754
42.4058	30.9855	452.841	36.5652	927.536	5.68116	1300.12	353.116	461.203	1432.64	941.826
32.6087	13.4638	234.826	10.4638	791.478	15.7246	1029.1	4.17391	937.188	17.8116	1292.07
7.84058	16.4058	18.058	422.029	21.6812	15.3478	26.2754	785.493	573.667	1308.28	1485.8
34.2754	13.971	5.84058	510.449	315.739	798.464	1116.59	19.971	457.986	1299.33	712.493
18.1884	32.8261	26.6812	1386.45	66.0145	61.7101	2.85507	11.3188	772.565	1173.35	924.957
41.9855	37.971	18.1449	19.2464	13.4783	11.8696	261.928	1278.88	731.246	1287.62	551.145
43.7681	20.8551	5.43478	12.6812	27.058	16.7536	10.1739	523.42	521.826	52.7971	1205.1
23.7391	32.2609	3.52174	18.6087	138.159	15.2319	780.681	543.768	643.406	775.768	817.826
31.3913	26.1594	16.2609	12.1449	182.159	13.5217	486.42	14.8696	973.478	1377.17	1533.52
14.2609	23.4348	7.53623	21.1159	207.826	15.913	20.1159	417.652	951.043	1250.91	1550.22
14.5942	21.0435	20.7101	29.8986	134.913	111.217	1524.55	1227.99	430	680.261	1207.26
9.44928	9.55072	17.7971	33.2899	10.8116	342.522	1179.22	974.768	516.174	463.464	1076.57
27.5507	31.6232	23.4783	15.1594	266.841	20.4638	2100.65	555.565	806.319	623.406	1171.55
37	39.6232	11.2609	39.6377	10.2754	88.7681	120.449	14.8116	629.188	1289.07	634.406
47.6812	419.638	21.8406	32.5652	2.69565	300.101	1034.14	4.10145	75.7391	22.9565	826.188
42.3913	20.2754	11.6667	22.8116	57.4783	185.623	968.174	434.029	909.783	1235.22	1075.35
11.3768	30.6667	5.05797	17.942	312.029	18.8986	20.2029	1240.97	720.536	989.725	3380.29
29.8841	27.8696	15.2174	29.0435	44	13.2609	2.36232	686.565	1043.39	950.826	756.014
23.5942	43.9565	578.464	17.3768	221.826	72.0435	15.0145	11.1884	808.884	923.696	1768.7
21.4493	24.3043	15.2029	23.7101	13.8551	3.66667	423.507	557.478	1.31884	1876.38	1455.52
33.0435	27.913	12.9565	1491.41	18.4348	480.449	673.029	778	561.043	526.71	1763.36
40.4928	30.9275	21.0725	217.42	3.94203	26.3478	669.406	1875.84	805.116	1943.09	2324.25
36.3768	22.6667	27.913	19.8841	28.7826	132.377	37.1884	6.34783	557.681	1231.74	1064.33
11.7391	16.8986	35.942	24.2899	94.8261	16.6087	425.493	450.652	947.406	1336.03	1574.96
31.087	26.3188	16.7101	13.6812	12.4638	14	642.899	451.217	1022.29	2824.09	872.116
32.913	23.087	4.65217	16.6812	17.8406	7.46377	368.478	958.493	595.304	595.377	1512
14.6377	17.6522	11.971	617.594	643.841	9.2029	12.029	1360.12	342.71	1176.36	1799.61
21.913	23.3333	10.0145	17.2609	187.478	12.1739	1187.88	6.33333	951.696	963.174	1910.86
23.6377	40.8841	16.8696	16.8116	114.522	10.4058	30.3333	333.391	16	979.638	1346.58
13.1304	591.913	10.4783	6.53623	321.507	90.6522	676.087	1060.1	682.261	1622.19	1252.35
25.5507	10.6812	1296.38	13.4058	827.986	47.7391	893.696	5.84058	445.971	1080.8	669.71
23.5652	14.3333	11.6522	793.058	150.638	15.5507	29.8986	372	393.507	1120.03	1378.2
54.3768	27.0725	19.1159	658.986	720.739	2.17391	568.71	3.49275	187.304	21.8116	1030.84
44.5652	21.9565	15.971	420.812	910.087	4.2029	961.116	774.217	13.2464	17.3333	887.188
34.2899	19.4928	6.23188	18.7246	29.6377	16.7826	75.7826	742.203	1154.04	1041.86	1783.67
28.4203	11	11.6667	33.5652	13.5507	306.043	27.7101	772.188	1089.19	46.5797	1015.68
25.8261	18.3188	97.3478	74.6522	1044.14	9.46377	577.13	21.2464	708.043	2100.3	1595.33
34.7391	14.8116	20.8551	23.4783	1594.8	5.14493	908.623	2.33333	677.203	813.174	932.536
17.7246	2.66667	23.3478	4.75362	31.0145	4.95652	62.7971	1253.3	17.4928	1453.81	19.029
16.7826	5.76812	564.754	8.13043	21.3333	11.1739	19.6957	23.2174	750.217	1304.23	2030.7
24.1304	10.0725	2.73913	189.319	30.4058	51.7391	1151.72	9.92754	1178.59	517.986	962.565
34.4203	36.5072	4.17391	5.05797	1296.75	16.4058	577.87	586.841	606.333	1278.77	1493.35
20.4493	29.8261	14.2029	24.0725	921.478	101.304	734.957	814.42	418.623	720.928	763.435
29.1014	8	5.89855	24.5652	15.6522	5.31884	793.667	189.058	710.797	1159.86	1148.12
11.058	8.26087	391.855	25	90.2754	5.94203	193.217	21.2174	1049.75	559.435	840.406
11.3768	15.4493	11.3768	10.6522	1164.55	89.1304	808.594	4.02899	399.246	522.565	961.304
11.8696	2.14493	10.971	24.8406	29.9275	254.377	831.812	724.986	1149.83	758.217	602.029
13.6232	3.34783	19.3188	11.5797	10.0435	11.4928	506.42	894.493	671.464	987.551	1219.8
24.2899	1.30435	27.8406	1225.67	17.5072	8.88406	159.246	1183.2	3.53623	22.913	803.942
18.6087	15.058	10.0145	1185.51	409.333	609.623	12.6087	419.217	417.406	982.087	1939.62
22.5217	6.24638	6.49275	38.4783	15.9275	1.72464	714.594	694.333	1225.96	521.058	1188.06
17.5507	14.3043	7.08696	31.1014	1204.12	6.62319	473.319	17.0145	834.58	3.08696	1775.99
8.88406	14.8841	884.29	23.4493	479.536	7.28986	982.826	1076.9	703.087	1012.8	1465.45
32.0725	20.7826	8.75362	39.3188	995.754	5.75362	538.797	1256.28	666.667	1634.51	972.478
15.7681	29.971	11.058	20.2174	406.884	71.7681	8.30435	281.696	503.913	631.043	977.913
21.1594	35.971	15.6377	69.1449	14.7536	9.01449	302.942	1055.36	7.94203	1399.36	1627.77
24.1739	40.6667	4.47826	774.333	3.55072	5.6087	348.58	1113.01	254.449	697.435	1311.54
16.8551	18.4638	4.4058	1418.99	4.84058	42.3768	727.884	11.5942	1110.45	503.58	1070.04
18.1594	15.4058	9.02899	37.8551	1073.93	10.7536	15.2174	1.02899	491.681	964.957	995.855
35.4928	22.0725	4.2029	45.5652	32.5217	7.92754	282.841	10.5507	1029.94	579.507	20.6232
8.37681	39.3043	16.4928	107.812	7.97101	17.9275	337.029	834.087	1059.91	558.536	1411.96
24.3913	24.2899	53.6087	152.493	21.4638	2.23188	911.275	12.3768	1141.91	1523.28	1114.28
31.8261	49.1014	575.42	23.8986	57.087	12.8261	756.623	640.565	6.47826	679.333	830.116
39.2174	22.7246	9.50725	44.0725	31.3478	17.8551	647.971	377.348	1.10145	1428	962.594
23.2464	28.3043	7.52174	32.1159	63.942	413.754	594.087	1033.17	431.826	767.145	819.348
9.7971	16.5942	349.449	44.2754	26.9565	3.53623	561.348	464.42	703.145	1129.48	1056.65
16.2029	27.2319	8.84058	2158.17	275.971	8.02899	14.5797	18.4783	721.928	19.2464	1478.42
3.52174	38.4783	16.6812	8	13.4493	441.768	10.2899	1258.17	71.6087	24.6957	2.5942
11.3188	20.7971	13.6377	29.3913	36.9855	217.145	754.507	605.522	498.391	712.348	25.4058
8.56522	36.1449	19.3333	80.3623	15.2754	130.58	55.6087	1461.93	606.304	1349.22	59.3043
41.1449	12.5652	4.97101	16.3913	509.565	14.6087	972.87	13.3043	322.812	681.116	9.46377
21.9565	28.4348	20.1739	17.8696	30.2609	18.4203	277.232	5.84058	38.6232	1429.42	16.1739
4.47826	10.4203	13.7101	29.1884	16.2609	8.81159	1707.55	1606.38	592.899	502.667	15.3768
13.1304	16.7101	205.493	36.1594	13.0435	348.739	1122.04	463.232	875.058	497.333	21.1884
8.44928	15.4203	9.44928	12.4638	5.98551	12.4058	29.0435	570.884	373.812	722.362	77.7826
7.44928	20.9855	20.7826	25.4638	46.4783	15.2029	8.95652	403.304	395.13	1641.64	122.319
44.7826	38.3913	17.029	25	25.5942	11.6087	1332.88	203.145	630.522	1384.3	36.6812
40.4058	33.3623	18.3913	26.3768	138.652	21.2464	15.5942	3.63768	1.4058	559.145	11.4783
19.7681	23.8841	10.4493	27.8116	23.4493	328.145	332.261	736.435	386.145	432.275	21.5942
54.8261	28.5797	12.3913	9.81159	763.797	32.4203	936.014	3.49275	797.841	825.188	18.8116
27.6522	20.8551	125.899	15.1594	16.4493	10.8261	890.638	1129.93	1082.9	1783.07	21.3188
23.2609	21.4638	25.8986	28.8986	19.9275	776.116	17.4928	7.33333	590.116	509.493	125.681
21.3913	33.7681	25.2464	15.2464	34.7826	35.6957	1063.04	3.88406	7.53623	1.56522	67.6232
17.9855	13.7971	169.71	27.1594	34.913	137.101	448.014	8.81159	603.71	701.304	20.4928
21.087	18.2029	7.91304	24.4348	1200.61	44.3043	768.333	676.71	874.913	859.058	61.2174
33.4203	12.5507	188.942	48.0725	16.8841	236.58	7.7971	703.058	627.464	1098.94	71.6087
26.9275	11.1594	22.5217	12.8696	13.6232	1.78261	1094.7	8.6087	684.681	991.174	40.8261
37.2464	7.01449	20.8986	11.2174	1458.8	11.3623	27.4783	231.71	554.899	1310.86	33.1159
27.6667	19.7681	273.58	313.71	23.5072	21.4203	1292.58	501.101	1559.12	684.275	81.8986
8.76812	31.6377	108.971	15.4783	26.7101	28.7101	627.101	607.536	1183.45	1451.33	94.2464
19.5072	8.01449	14.0435	20.7826	10.058	66.9275	22.7246	6.36232	886.768	805.899	197.058
25.7246	20.7826	9.76812	21.8116	22.4783	5.08696	783.478	422.739	1033.67	615.87	54.9275
28.8841	9.02899	18.5217	22.8986	434.362	11.8551	776.478	1215.59	1029.1	973.072	201
17.2319	2.13043	12.7391	15.9275	278.449	217.594	1.14493	6	142.667	1317.36	51.6812
30.1449	14.6232	22.4783	19.0435	119.841	12.7681	14.0725	1187.01	21.1739	47.2029	64.5942
9.6087	3.42029	4.26087	2.3913	561.391	139.116	29.0145	792.986	614.13	1402.06	21.3623
35.8986	12.9565	3.31884	222.493	994.449	10.058	1415.64	400.493	873.13	774.739	133.333
11.1594	7.66667	14.8986	7.14493	18.4493	814.971	22.2754	970.014	782.609	897.783	148.594
19.942	11.7971	9.81159	31.4928	28.8986	6.4058	1162.67	611.377	558.942	746	45.029
15.8406	4.72464	12.0435	136.145	43.1304	6.3913	824.275	902.841	779.058	1209.55	69.3333
6.65217	7	21.8551	28.2464	14.7391	3.23188	802.203	665.942	484.348	1335.35	145.275
21.9855	3.27536	19.6377	23.9275	10.8696	17.8261	810.159	324.522	397.406	1223.23	72.3188
17.1304	10.913	21.9565	44.1159	51.7971	409.232	266.971	553.333	796.522	10.8986	96.0145
9.66667	2.30435	14.5217	9.5942	26.7101	7.69565	344.942	396.304	745.551	1253.62	40.0145
22.9275	16.2754	12.6522	21.7101	36.3188	277.435	275.29	327.812	985	923.971	86.5362
27.8986	879.261	56.1014	61.1739	1752.94	8.01449	9.68116	3.02899	24.7681	24.7101	228.667
25.8841	11.2464	20.4638	17.5362	31.7101	507.188	759.667	942.188	177.377	1016.97	61.2464
19.9275	13.0725	662.87	50.0725	33.5217	19.6232	4.85507	516.232	894.188	1806.42	152.609
27.3333	12.1449	516.203	800.971	15.8551	640.768	221.826	6.36232	1000.78	947.507	128.913
6.15942	38.087	27.6232	29.5072	18.8551	242.087	319.159	2.71014	9.44928	1014.81	137.783
39.1594	31.8841	14.4203	7.15942	4.31884	383.42	610.333	568.072	965.029	1359.83	230.449
28.4203	16.1449	21.2174	906.797	656.13	389.449	809.725	322.464	267.159	672.609	32.2029
28.9275	6.56522	47.8261	26.8841	8.37681	20.8551	577.739	421.493	616.072	635.029	92.2029
26.1304	35.5942	17.4493	5.33333	16.3768	18.5652	984.406	1579.52	603.174	1491.23	24.4203
21.0725	24.4058	2.02899	4.69565	58.3333	179.087	9.24638	6.89855	481.667	1155.54	111.116
15.1159	22.2174	73.3043	31.1884	29.8986	64.1739	1912.01	4.26087	868.101	1606.38	107.971
13.9565	6.52174	206.58	3.08696	1902.59	17.6087	534.87	775.652	142.507	734.29	38.7246
16.058	45.5362	16.6812	31.3623	20.1159	589.841	922.797	381.58	559.928	5.78261	949.362
22.1884	102.594	994.841	20.1304	19.7826	280.087	473.942	40.6812	767.942	948.377	1138.43
19.7246	20.5507	2.88406	9.85507	1591.17	90.0435	598.739	195.58	122.725	513.42	896.899
11.5217	16.7826	231.623	42.8841	41.7246	26.4058	12.5507	579.536	590.551	2.95652	945.783
21.1739	33.8116	2.42029	29.4783	24.2319	128.101	555.348	550.217	727.333	599.087	1191.9
22.4058	25.5797	290.116	44.6812	1377.83	22.942	9.66667	958.261	822.565	870.13	694.58
4.97101	34.4203	9.53623	19.6812	677.507	36.7101	577.333	3.15942	20.942	1245.64	1556.59
18.3478	14.058	75.1304	4.7971	29.9565	11.1449	662.188	1129.62	506.739	565.406	1210.91
16.2174	17.029	2.37681	29.3623		24.5652	306.899	467.232	227.058	1115.86	1068.7
6.62319	26.7391	271.435	17.058		26.2319	27.3188	135.652	536.957	999.406	1355.14
10.0145	7.84058	175.435	76.7826		20.3478	16.7536	849.899	405.478	647.609	1479.42
2.55072	37.4203	18.1739	34.7536		6.3913	1011.1	232.957	389.884	1523.71	1658.01
17.8551	17.6087	16.2174	609.159		9.37681	804.913	371.043	520.246	798.101	2651.3
18.5362	26.9275	5.85507	19.5362		14.3623	34.1739	3.95652	506.609	1132.61	6.89855
24.3913	23.6812	11.7681	44.7681		608.362	1243.67	20.087	630.159	699.449	1835.49
49.1304	9.86957	12.8986	31.6232		393.116	757.58	7.4058	545.217	7.14493	783.565
36.8406	19.087	351.884	26.2464		12.7826	543.609	9.11594	897.029	1312.22	764.29
13.4493	15.2609	10.971	26.8986		1.7971	4.05797	706.536	30.5797	22.4928	1500.86
6.50725	13.6957	5.27536	21.6232		932.623	424.609	403.406	11.3913	446.667	1239.87
22.4928	12.3043	822.71	30.4928		9.50725	493.551	232.116	32.913	696.13	1568.06
37.1449	18.3043	19.971	32.5797		214.957	1209.58	979.29	1103.71	2703.09	2878.41
16.9565	401.058	647.507	58.4058		15.0145	8.57971	810.652	723.565	1138.52	755.101
31.1304	21.1159	20.8116	52.3333		7.71014	936.304	600.609	484.188	1635.42	1041.71
8.97101	22.9855	5.33333	17.087		412.536	1072.1	10.7101	1000.88	614.942	572.739
25.1739	17.058	9.78261	35.058		96.9275	21.971	696.246	1448.13	1435.39	1404.09
12.4638	27.5362	499.087	19.5507		12.5797	30.2029	617.652	472.043	36.6377	1184.45
26.8406	23.971	59.2174	138.942		2.94203	1885.7	728.116	555.841	1444.59	1272.72
43.1014	18.5797	11.8551	27.6377		135.623	666.217	194.116	863.319	871.319	1477.74
15.3333	7.18841	7.7971	381.101		11.9565	24.3043	155.942	994.942	1492.23	988.174
27.0435	26.7101	3.88406	32.6667		579.058	1745.65	2.31884	455.797	1428.54	1865.01
8.57971	18.2174	10.9275	34.6232		472.957	947.884	383.928	3.07246	1737.61	1170.46
19.0725	23.8986	193.232	4.11594		13.2319	15.7681	306.116	861.101	1814.48	1407.77
29.913	23.913	66.2029	17.3623		352.681	792.623	17.6667	1580.36	758.681	1757.12
13.9565	31.2029	19.5507	15.2319		6.26087	19.4348	496.797	761.536	799.087	678.232
25.8261	24.1014	6.69565	286.71		3.21739	825.174	651.783	571.928	20.3478	1720.04
26.6957	14.6957	16.1159	3.47826		42.3913	862.145	10.1449	628.014	1703.62	1644.43
19.3913	10.029	18.7246	3.18841		11.087	40.5652	822.362	1214.72	1.53623	1041.84
35.942	11.2464	4.76812	1507.83		8.63768	23.5072	13.7246	757	1421.54	1123.9
23.5942	21.8116	25.7101	19.3333		1079.84	1317.94	956.072	1093.06	930.348	885.87
4.11594	1327.26	13.9855	3.07246		287.681	2074.97	452.159	537.391	816.551	836.275
18.4493	33.4058	8.86957	25.8986		329.957	9.97101	25.7826	623.232	1849	33.8261
16.913	1.57971	8.6087	18.0145		476.014	539.942	530.014	340.116	30.029	1119.81
12.7246	1.95652	14.8696	20.8116		1092.86	562.043	409.087	1084.64	1296.06	1576.41
19.6232	15.7681	21.5507	26.1304		398.797	1267.03	441.435	560.362	773.174	1430.16
16.2899	280.072	2.78261	12.6377		805.174	38.9565	20.3333	498.986	1055.77	1324.1
28.6377	19.4928	21.8261	6.49275		12.3478	703.217	469.42	555.159	1333.41	31.3913
16.2319	32.2029	39.8696	20.3188		6.08696	5.62319	606.29	333.043	26.7681	1778.16
20.5217	65.6812	14.7246	18.4348		120.188	900.464	419.435	720.812	1146.71	1869.17
6.98551	21.5797	1168.8	14.4638		426.101	1831.32	11.9565	351.29	1386.16	7.89855
4.42029	32.2464	29.6377	5.56522		4.6087	194.101	917.087	1120.16	1546.43	814.899
7.27536	30.6377	16.2899	628.609		26.8406	206.609	959.899	671.159	710.667	849.681
13.8986	162.739	2	8.72464		3.91304	14.1594	26.5797	802.884	29.1884	806.406
2.2029	25.971	15.1739	18.2174		11.4493	18	403.391	489.043	1564.33	765.899
11.2174	22.6812	8.52174	4		15.4928	30.5797	389.029	1014.49	1002.29	756.058
9.24638	20.2609	412.551	136.855		23.2319	7.86957	13.8841	18.6232	1170.51	971.797
2.52174	608.797	13.942	22.0435		380.826	800.928	925.478	588.841	7.81159	1135.28
7.31884	16.1594	7.05797	15.1739		28.9565	6.75362	313.783	828.841	1002.93	738.348
18.2609	105.493	3.31884	179.13		21.6812	633.551	8.26087	429.333	14.1159	1264.25
3.82609	4.24638	7.92754	6.75362		10.4493	29.2899	880.333	738.464	723.058	737.797
16.8841	14.2754	14.4493	35.7971		372.551	227.232	389.725	430.435	517.391	413.986
14.2319	5.97101	18.942	19.3623		22.7246	685.362	457.014	611.855	1002.46	3.72464
27.1884	10.971	4.05797	1002.78		46.9565	15.8261	346.957	829.986	708.536	1115.57
12.5072	23.5652	17.2464	32.5942		2.21739	3.44928	637.246	266.159	1474.52	1182.49
36.5072	23.2319	19.2464	417.449		7.89855	730.942	787.435	324.174	16.058	1028.35
19.2029	642.681	14.5072	29.2754		26.1884	167.841	624.377	1160.48	1206.12	836.928
19.7681	28.5072	13.6957	51.5362		25.9275	1223.8	507.29	701.783	959.087	984.246
7.75362	15.3768	8.18841	26.3188		19.087	22.1739	754.435	441.319	1076.75	458.246
21.6957	27.5217	9.57971	43.8986		1.53623	33.4203	183.435	780.623	439.551	948.333
15.4783	28.4783	40.5942	46.8841		337.971	833.29	446.58	579.855	674.667	1249.77
25.0725	14.4638	11.9855	19.6232		31.913	1197.94	588.174	500.087	10.5507	785.58
21.3478	46.2319	7.91304	34.8696		10.7391	680.043	278.246	661.493	591.391	583.159
16.4638	34.2029	201.348	34.3333		12.5942	992.217	501.797	522.696	445.333	16.942
27.8406	25.7971	7.31884	24.7681		50.2754	1257.75	434.348	9.04348	868.478	1092.65
24.029	14.2899	34.7826	38.4783		20.6667	24.3043	589.464	282.087	871.768	1460.87
18.2464	29	17.6667	16.029		562.971	813.884	750.174	253.188	1125.14	2611.64
29.6812	30.3043	564.348	17.1014		2.17391	850.362	730.696	476.029	1114.35	1010.97
17.8696	24.1159	3.30435	18.942		8.17391	11.7536	346.261	831.348	1533.96	946.159
23.1449	13.7971	589.928	18.3188		22.5942	911.841	672.609	897.043	729.87	2336.72
13.0725	15.8406	30.3043	15.9275		5.08696	5	1056.26	1099.32	1032.78	1226.26
16.8986	20.6232	9.46377	23.7391		3.57971	16.3478	1.43478	195.623	436.232	713.232
31.913	14.6667	10.029	28.4493		9.08696	1036.57	229.986	625.232	479.652	1733.75
11.2464	27.6812	8.53623	33.3333		18.8116	37.0435	540.42	164.464	1113.62	1180.61
20.3333	26.3333	20.2899	292.043		12.971	675.884	744.203	241.826	505.435	1181.61
16.7826	18.4348	3.23188	34.2754		20.2029	597.13	11.5362	602.087	546.609	792.159
58.6377	6.5942	466.159	14.1739		447.029	1379.36	395.783	117.101	961.304	1612.06
42.7536	35.8696	61.0435	3.6087		3.72464	156.159	1665.46	614.159	555.942	899.638
35.2029	7.30435	611.957	30.6667		11.6957	1054.1	770.754	717.406	1316.87	522.971
22.1449	15.9275	14.3623	25.5072		9.73913	575.493	8.88406	548.826	944.116	1481.26
17.3043	13.942	16.1884	74.3913		9.56522	22.7971	3.95652	688	1211.45	643.275
30.4493	10.5797	11.6232	39.5507		12.4783	989.754	3.94203	1260.74	322.797	810.087
51.6522	29.3333	5.3913	53.0725		374.928	1146.29	251.609	1634.25	507.203
4.26087	23.5362	2.31884	15.3478		37.4348	941.609	811.899	1191.96	768.623
17.942	8.49275	9.15942	34.3333		403.058	566.217	17.1884	239.362	530.29
19.7971	345.725	7.26087	44.2464		5.81159	28.4493	775.188	1143.97	760.986
33	10.2899	4.65217	39.5652		168.232	10.5362	457.928	902.435	446.783
15.4928	23.3478	5.23188	44.4203		2.56522	1561.06	13.3768	268	448.188
13.9275	13.0725	428.797	37.058		373.246	366.768	761.029	1466.22	759.333
13.942	29.6957	2.30435	11.913		4.36232	5.5942	65.3188	216.768	762.507
20.971	11.3478	4.97101	22.0145		2.36232	1366.68	31.6087	919.348	815.043
14.7101	28.9275	5.53623	15.9855		15.1739	15.1884	360.464	622.652	723.768
17.7246	39.4203	39.7101	27.7101		239.797	463.058	4.75362	426.145	560.754
39.5797	17.5942	7.43478	54.6667		8.46377	936.449	399.464	688.333	1222.38
24.1159	876.812	11.5507	20.8986		20.2609	1106.83	1059.57	911.696	442.71
44.4058	18.2609	11.6667	1202.65		385.478	730.435	9.15942	835.667	12.6957
32.1159	41.7391	18.8406	33.3913		4.50725	15.0435	698.101	406.957	542.87
24.3913	31.6232	9.6087	25.6667		34.5797	1.85507	592.391	675.42	360.058
6.78261	26.942	14.3623	34		331.768	616.913	800.319	924.652	3.89855
21.7536	317.449	13.7536	36.5652		12.4638	1005.96	7.13043	587.638	626.899
21.4348	4.73913	155.58	31.1739		12.029	656.101	19.2029	1139.74	615.275
3.63768	34.2754	7.53623	89.6087		1.72464	6.15942	671.29	768.522	436.13
30.6957	22.3913	20.2029	25.2029		157.159	691.464	10.7826	419.754	1124.62
35.4783	19.2464	8.18841	202.304		2.94203	757.87	752.13	118.565	704.29
18.1449	27.913	15.3768	31.6087		66.6957	990.101	12.7246	431.203	1080.55
32.1304	17.0435	350.71	26.2464		7.36232	21.8551	335.246	829.42	324.725
20.9275	133.942	14.5217	16.9855		219.072	630.29	458.739	1.73913	587.116
26.6667	14.5942	182.667	23.2609		17.2609	1994.55	9.69565	460.899	27.4928
11.9855	25.5362	26.7971	17.3188		188.072	2	190.87	586.014	432.739
26.4928	17.2029	389.087	23.1449		61.9565	944.348	13.1449	481.986	483.159
35.5362	30.3913	95.2319	85.1304		198.333	723.899	353.899	690.014	626.116
15.3768	8.4058	5.97101	5.3913		23.7681	577.899	1257.96	1848.42	1128.9
19.5362	23.1014	10.5362	38.4058		14.7101	152.232	1191.45	377.435	1072.29
22.2464	3.82609	10.1304	16.8116		14.1594	300.188	889.406	496.507	1832.83
9.76812	34.6812	169.623	649.884		15.6667	1063.87	978.623	533.594	1012.48
32.7536	1.95652	108.348	6.28986		19.7681	7.31884	22.5362	669.087	569.348
26.1884	12.0145	8.66667	4.6087		802.768	358.623	1529.87	391.58	745.522
30.6667	22.8841	3.17391	66.6232		665.652	6.01449	459.493	393.884	501.246
20.7536	30.6667	3.33333	1.71014		404.029	17.4203	799.725	570.29	853
13.971		4.47826	16.029		13.8841	684.942	12.3333	439.638	945.362
1.71014		19.7536	94.0145		599.507	3.13043	234.043	307.464	993.072
5.17391		14.2609	11.7391		74.087	1181.84	352.667	406.232	1139
14.1014		20.3333	9.76812		419.304	383.638	5.69565	119.043	1239.81
20.8696		11.4493	25.9565		47.6377	32.7536	429.493	760.928	317.957
11.0435		6.82609	150.638		154.623	8.3913	9.31884	424.58	911.449
25.1159		26.1304	20.9565		17.0725	821.957	612.957	920.087	964.855
8.6087		13.4058	635.58		12.7536	22.913	22.9565	691.565	631.116
9.7971		17.2609	8.82609		10.2464	526.014	528.638	1538.06	797.507
9.68116		15.7101	42.2319		26.942	29.3623	7.36232	67.4493	1363.13
8.72464		4.84058	21.058		2.69565	16.8116	498.087	304.957	1080.09
8.56522		14.2899	11.8696		30.0435	29.6087	639.174	263.435	491.13
15.8116		14.7246	25.8551		423.435	10.3043	862.696	436.304	667.812
27.029		20.913	16.3188		290.928	1109.16	16.7826	553.435	396.754
25.2609		20.1594	18.2754		9.55072	243.986	562.594	159.899	386.435
18.5942		9.86957	27.7681		7.17391	100.406	499.362	500.841	2.76812
40.3478		20.5652	14.6522		13.4058	22.5072	610.203	588.783	1448.13
22.8696		24.4203	15.4928		4.47826	30.5652	28.8116	479.725	17.1594
63.2319		168.725	19.1884		262.058	512.159	10.7681	655	197.594
33.4493		8.01449	13.4928		17.6522	1853.09	184.609	802.464	1009.87
43.913		5.52174	253.681		107.232	1536.84	578.826	14.4638	927.406
21.5217		5.65217	24.7536		10.6522	777.638	14.3043	261.536	886.014
22.6812		310.667	32.4928		617.362	37.4928	412.507	150.145	893.507
12.0725		11.6377	42.058		13.8841	14.3188	1373.3	388.957	731.623
33.5072		1.98551	50.7391		75.4928	1264.86	10.1449	213.957	340.754
11.3043		378.754	8.53623		37.5942	46.058	329.203	638.855	446.957
31.3478		2.49275	88.2464		7.95652	41.7246	742.667	1140.3	1078.06
20.5072		1004.03	25.5652		1.34783	16.4348	10.2899	6.26087	1607.9
15.3188		23.7536	37.4203		5.05797	435.884	676.261	449.725	2303.59
38.0435		67.1304	35.5217		13.4638	1823.67	384.58	143.942	299.594
24.8841		7.31884	46.971		145.754	682.043	631.116	874.797	4.01449
7.52174		661.623	26.1159		9.11594	741.58	735.449	663	1601.65
27.9855		7.15942	24.6087			9.63768	502.043	289.217	1512.94
33.7536		8.95652	30.3913			6.98551	464.116	394.014	592.42
19.8696		84.7101	19.2029			1100.72	412.304	534.623	1093.55
8.17391		5.07246	1398.97			618.899	8.13043	399.754	939.13
39.7391		793.087	10.6377			1394.38	279.652	497.362	1008.48
29.4493		455.188	30.087			23.5797	990.971	781.188	1096.7
15.7101		10.1594	28			464.536	621.594	722.551	975.217
23.3333		7.55072	237.188			18.9855	569.435	248.246	569.884
33.0145		4.65217	43.3333			8	397.855	866.217	969.522
49.6957		10.5362	21.2319			824.275	595.391	530.391	745.478
42.6812		14.8261	19.5217			1513.46	280.29	877.304	760.928
45.2029		49.8261	6.88406			8.08696	294.957	509.71	63.6087
20.5072		17.1014	17.5362			701.971	1162.78	947.203	959.986
22.0435		10.4783	21.2754			154.609	836.899	141.826	1337.84
23.6957		16.2319	25.6232			1010.28	10.8986	323	1313.42
20.3768		11.1159	19.1884			7.34783	799.145	676.188	1139.35
22.7826		17.8841	15.4638			21.2899	897.159	586.42	1084.86
29.7826		7.07246	111.551			31.6957	558.87	451.58	2411.86
35.6667		30.2029	30.8406			15.1304	658	755.449	1603.93
17.8986		11.3043	4.68116			1252.23	905.638	498.899	1412.57
20.913		8.18841	31.8551			505.116	932.783	767.986	900.406
14.3188		38	17.5942			915.087	1521.04	453.072	2705.7
43.1449		20.087	29.1884			30.7536	1380.19	828.725	924.362
20.9855		44.8841	10.9565			3.62319	553.942	542.565	1460.19
26.087		1.62319	42.5507			274.391	408.304	22.2899	895.87
25.9565		5.62319	20.8116			439.522	1290.03	678.87	1770.87
42.1159		78.8696	13.5652			954.928	851.768	573.551	918.333
31.8261		707.507	13.5072			933.696	39.8696	1575.57	3100.2
26.9855		8.76812	4.6087			717.261	1636.35	561.913	10.6667
17.7826		11.6232	28.029			326.406	960.478	12.4783	1831.61
27.087		7.72464	25.4058			182	955.681	521.449	800.855
26.6522		19.0725	12.2899			235.768	1882.78	29.058	3056.3
35.3478		21.6812	13.4058			1017.55	950	790.725	1316.52
19.0725		2.44928	7.75362			5.75362	1075.49	676.565	2950.87
15.9855		34.1739	542.942			586.826	20.3623	1208.42	1162.64
14.4493		95.3043	3.43478			18.1594	20.7246	451.29	1332.55
27.8406		15.2754	64.8841			594.928	1220.14	990.174	1552.91
22.6812		8.42029	20.6232			936.928	1788.75	571.13	1029.43
20.7971		311.986	5.15942			3.31884	926.406	544.667	1452.77
13.971		6.6087	748.928			702	916.797	764.29	1235.65
34.8986		6.26087	999.116			837.174	648.594	939.725	855.522
12.029		12.4348	21.3623			728.464	28.6957	510.87	1523.77
42.7536		17.6522	32.7101			769.768	725.145	659.188	8.72464
16.4348		22.6377	11.1449			3.66667	595.609	29.029	971.188
28.2899		25.2029	19.3478			39.087	13.2319	254.725	1347.84
24.4638		12.8406	24.3478			25.8116	491.609	487.739	1556.1
29.2899		14.1304	28.4638			8.42029	1454.84	362.246	1217.67
12.1014		22.7536	25.9275			1038.54	763.304	1571.03	893.087
27.9855		23.4348	14.7536			9.26087	21.6667	926.768	1007.23
22.6087		10.6087	29.7681			1211.45	1522.81	674.551	1685.03
42.1159		39.6377	28.087			42.3768	448.174	572.029	1496.28
28.1304		16.3333	589.594			294.319	885.87	1162.52	27.7391
2.95652		4.37681	13.3913			8.28986	1513.59	1157	1462.57
1.28986		13.8551	510.522			1430.62	2204.03	373.42	1359.29
9.31884		17.6232	18.9275			9.15942	1390.52	1.42029	2058.84
7.37681		13.2609	40.7101			66.8986	1472.71	714.899	2134.64
12.1449		10.7971	21.5507			4.94203	505.841	1049.03	1122.32
13.5362		13.5217	32.2754			18.6522	817.739	322.159	96.3913
8.66667		4.4058	40.4638			649.188	904.043	866.594	983.087
10.5652		1042.03	9.82609			22.6957	415.333	718.043	1067.83
7.27536		4.89855	33.0725			20.4058	14.4783	860.899	1374.12
17.3188		20.8696	664.493			1413.43	3.53623	905.449	752.797
7.53623		366	27.913			1292.16	1128.99	1053.17	2395.3
7.01449		11.5652	25.7826			1121.75	991	240	1441.36
20.8986		10.4928	279.232			1004.45	399.71	976.942	1641.7
8.01449		524.464	2511.8			1047.54	53.5217	551.725	569.754
8.2029		73	67.058			19.6522	1131.52	1149.64	1253.57
35.2319		16.9565	53.1449			1363.13	1181.36	983.29	1087.32
13.6377		76.087	24.3623			14.8261	1773.57	1209.29	1308.86
13.942		217.739	10.1304			46.3043	519.275	838.812	911.826
19.0435		11.5072	1135.7			783	27.8406	379.768	895.667
25.1159		9.84058	19.7826			486.681	86.1304	629.42	976.812
27.5797		2.26087	23.3478			28.3333	1256.09	956.899	1255.68
14.9275		40.6522	12.7536			1107.8	1089.09	17.8696	12.0145
6.85507		8.98551	28.6377			9.71014	262.058	975.232	23.5362
5		258.275	1890.94			17.913	807.652	904.754	1742.23
16.4783		44.8841	33.0145			980.928	1376.93	991.333	33.1449
2.43478		581.768	27.1594			1218.81	462.71	788.623	1346.14
7.07246		6.2029	1058.93			532.565	1469.58	571.333	1288.07
3.33333		7.89855	69.9275			6.30435	519.725	2.71014	881
12.3478		296.116	38.8406			498.87	948.319	783.87	426.261
20.8551		11.3188	8.95652			331.246	29.3188	197.667	943.42
25.8841		4.69565	30.3768			1786.49	270.594	255.71	1024.22
15.3043		4.84058	11.2174			5.21739	514.072	521.072	1304.71
30.3623		4.42029	20.6087			664.536	1648.97	810.942	65.2609
15.2029		4.3913	34.8841			86.6522	43.8696	614.029	2327.55
16.913		1.86957	26.3043			352.971	468.884	1131.14	8.53623
21.9565		245.768	30.4493			759.159	1155.22	7.89855	1000.16
4.01449		12.6087	30.9565			22.7391	20.4348	775.87	724.159
24.9855		12.5507	19.4058			6.30435	497.667	1102.8	15.8986
14.2754		1.97101	35.8261			20.9855	10.3043	652.478	791.826
4.11594		14.9275	11.5362			19.8841	972.362	861.29	1059.62
33.3623		9.84058	89.5652			369.435	3.95652	796.855	511.739
3.86957		11.7246	28.1884			540.638	1765.99	1276.84	2069.26
7.7971		17.5362	9.13043			619.13	3.69565		808.971
15.6957		7.91304	51.2754			22.2174	346.435		2108.46
39.4783		11.1449	7.43478			224.884	301.565		1116.91
10.6522		7.82609	576.565			22	922.058		1606.55
12.5942		14.7246	15.8986			20.5652	421.188		1294.1
16.7826		4.21739	30.3913			1126.06	648.594		1401.64
15.8406		414.58	35.1594			374.232	1317.84		25.6667
8.21739		10.4203	52.2029			1431.83	830.551		2019.62
15.7246		17.0435	28.5942			18.5362	599.42		983.522
18		16.5797	4.08696			537.565	26.8986		1081.22
3.13043		530.58	695.71			444.145	882.232		1073.43
32.4638		22.5362	108.464			13.7246	5.01449		2038.51
14.7246		18.6522	9.05797			5.42029	404.333		1173.51
23.2174		16.0145	219.449			18.6087	17.6812		1400.39
26.2174		10.5797	72.8696			663.159	493.116		1163.81
6.34783		21.1449	25.3623			13.2609	508.29		1080.09
7.4058		45.8986	11.2899			314.493	1233.3		2344.8
17.5217		5.69565	12.5217			4.98551	32.3768		1553.91
23.7536		426.101	24.7971			14.6957	1057.03		3221.72
17.6812		12.1884	10.2899			195.188	617.536		782.319
10.2609		9.53623	18.058			968.29	7.46377		1065.99
2.05797		21.6667	36.7391			1027.7	569.217		1560.68
25.2029		15.3768	43.029			923.203	787.971		2039.35
7.66667		3.66667	34.4638			831.768	1797		1345.51
7.82609		8.26087	32.7101			1079.67	1253.52		2362.33
19.6377		8.46377	39.5217			647.362	728.667		718.652
15.5072		14.0145	24.8116			881.159	992.029		1077.12
15.1884		2.86957	481.899			5.17391	597.203		1410.99
35.1739		6.5942	20.4783			139.855	699.377		1413.71
15.5942		26.8841	101.623			1.27536	385.783		1473.91
1.05797		1.52174	31.2029			35.2319	2.53623		2230.46
10.971		25.8696	38.5652			847.217	462.551		1792.59
28.1739		11.2174	33.0435			2.44928	1223.59		1458.51
19.8551		4.02899	1.81159			1177.68	627.029		1376.54
24.8116		27.9275	32.4348			923.899	559.913		10.3188
31.1594		9.86957	46.3623			412.739	838.42		579.391
6.72464		24.1304	30.4638			849.333	1099.81		893.754
10.8696		6.11594	48.913			949.391	525.043		870.652
6.52174		199.507	38.3623			28.1014	1049.04		1425.9
6.72464		29.7536	17.4348			2.36232	8.89855		1447.29
11.7681		16.0435	11.7826			1166.99	317.971		1521.54
7.13043		12.5217	625.942			27.2174	2.68116		1859.94
2.89855		24.2174	19.5942			92.8841	431.043		120.594
4.56522		6.62319	5.81159			6.26087	19.9275		1507.33
3.73913		2.6087	249.725			20.0435	4.31884		2228.16
8.11594		75.8551	19.3043			1002.04	570.58		734.884
9.95652		16.4928	339.681			17.7101	820.986		940.232
4.91304		20.5362	22.5072			10.8406	14.8261		2406.45
7.47826		10.4348	17.9565			1182.55	35.5362		3341.94
7.11594		15.6812	17.9565			22.7971	811.203		1508.03
17.7826		929.159	33.1159			13.3913	790.855		1930.2
7.78261		1.46377	20.6667			17.2609	1.2029		1292.8
3.43478		5.95652	31.942			1156.51	19.3188		3309.78
16.971		17.9855	18.5942			21.087	16.6522		366.029
13.0435		3.68116	7.98551			33.4493	686.667		2227.28
9.23188		3.13043	33.1304			10.3768	623.551		1356.48
2.17391		13.5652	24.1014			12.4928	2.2029		1408.13
16.1884		16.2899	319.812			569.899	918.725		2847.51
15.1449		11.7826	27.3623			18.0145	34.4493		1292.29
21.4058		9.17391	642.449			1647.99	15.7536		4.55072
15.4348		297.478	28.4928			1209.93	1802.52		598.536
23.3768		6.2029	25.913			12.1739	1595.54		1280.01
6.76812		16.3913	59.3913			719.826	1155.54		2877.97
22.4203		17.2174	132			433.348	77.5652		941.899
11.4348		3.62319	29.2899			276.797	1003.58		912.667
18.0435		13.5797	4.37681			726.681	67.6522		944.652
19.5942		18.913	12.9275			16.3043	1377.77		1191.58
11.5362		6.23188	2419.1			12.4058	439.739		1676.96
10.029		22.5072	854.971			5.2029	599.072		1103.57
30.6522		139.449	1304.38			3.94203	1496.29		871.42
39.9565		1.89855	722.942			859.522	431.116		32.3623
15.8986		1.18841	963.145			9.73913	675.42		1851.25
29.4928		7.89855	561.536			22.6232	1435.22		1684.71
25.4928		678.942	1205.38			15.9855	1767.29		1418.23
30.2319		142.623	713.188			18.2899	766.971		1243.14
39.0145		30.1304	651.942			23.8406	19.2319		1036.36
37.2464		897.101	1128.19			2.47826	621.71		785.319
27.0145		5.57971	579.188			36.7971	1232.81		1874.75
20.8696		111.971	1421.43			1274.61	1137.42		700.261
13.2174		9.21739	1215.54			1219.45	709.014		499.942
41.9855		855.536	727.855			42.1159	1305.07		865.014
27.6957		8.33333	905.348			1225.43	1511.26		1110.86
14.7971		18.8696	919.29			444.768	946.957		170.333
37.2319		7.92754	438.304			440.768	765.116		413.391
62.6957		3.02899	642.377			680.913	703.275		183.246
20.6522		17.2464	1316.14			1093.71	31.0145		236.464
15.2029		3.23188	1310.19			648.362	24.4058		337.928
10.3333		283.58	1114.88			758.696	32.4928		550.884
22.5217		5.98551	1309.96			43.971	1016.43		116.304
31.8841		10.6232	1678.83			1402.39	458.304		193.957
30.8841		16.1739	1011.75			1908.74	1194.25		419.304
20.6667		579.71	713.681			633.594	1366.64		515.13
37.6232		18.4058	721.957			299.725	1856.42		196.333
35.2464		10.4493	959.522			468.594	1138.41		347.957
30.7536		310.435	566.971			3.31884	1106.57		433.913
23.087		277.87	813.333			283.348	910.435		324.029
35.1594		21.4638	1371.41			293.304	84.0145		842.841
22.7681		17.7101	1307.67			479.29	2632.81		494.072
20.2609		16.7971	689.942			508.594	689.101		9.44928
52.7536		15.8841	2160.88			5.01449	218.043		300.768
8.53623		12.5797	1485.03			17.3768	635.536		401.551
23.7971		14.1449	663.261			10.3478	979.203		417.826
23.3913		8.24638	1650.41			612.899	8.72464		421.29
38.3623		9.27536	766.391			8.17391	446.275		288.145
24.5797		10.7246	1244.32			1.56522	1645.88		238.261
10.7971		16.9275	761.522			7.27536	1576.94		14.5072
13.3043		12.0435	1712.06			8.86957	2060.99		9.49275
18.4493		12.4203	841.478			137.014	291.261		149.029
10.3333		17.3623	1790.39			14.7681	936.087		242.87
31.1449		22.5362	1786.45			7.27536	9.76812		471.58
34.4928		169.464	3061.3			7.98551	1142.52		610.246
8.81159		21.1594	1618.26			9.84058	13.9275		293.261
21.1014		29.2609	598.638			23.4783	959.609		436.043
11.7681		172.565	1196.86			2.78261	997.681		426.928
37.5507		180.348	2189.57			45.3043	16.4638		321.058
36.4493		20.2609	789.493			30.8841	1018.16		397.725
10.087		9.04348	552.594			12.6812	1258.91		410.464
29.3478		6.28986	418.217			5.94203	962.609		412.725
27.6812		230.797	1219.61			4.18841	21.7971		676.072
28.7971		21.2464	1179.41			29.4058	968.623		380.145
25.3768		17.2319	2840.3			3.3913	676.304		644.594
25.2319		2.46377	588.174			16.4638	593.275		410.812
32.8406		13.9565	477.812			38.8261	969.29		97.9565
17.4493		105.116	1158.57			13.8116	10.7101		337.261
16.6232		9.95652	818.899			38.3623	10.8261		466
25.942		24.6667	533.971			8.98551	1274.96		576.29
26.7101		17.1304	977.536			3.5942	607.159		383.203
19.5652		15.4348	1063.67			55.6667	665.913		672.942
14.8986		18.6667	587.928			23.5942	338.957		308.362
21.2754		24.2754	717.841			26.9275	1293.41		691.841
40.3913		19.8261	508.464			70.942	633.797		354.449
24.4493		13.7826	885.768			41.4493	1364.99		213.391
28.3188		15.6087	780.609			33.2174	322.841		415.391
8.21739		132.377	777.319			26.3913	242.159		355
10.3478		1.24638	1161.29			16.087	1221.06		936.217
18.7971		24.0435	1625.32			3.95652	2347.25		704.812
13.1884		13.3333	879.449			36.7391	49.2029		469.58
35.971		19	874.029			6.37681	1057.36		253.348
20.2754		9.50725	1468.91			11.087	524.188		340.623
1.88406		17.8841	840.71			29.1594	531.826		297.957
3.66667		13.087	800.913			7.76812	653.435		356.667
30.6377		284.971	762.13			3.27536	1272.03		263.71
26.058		4.36232	1442.99			6.33333	4.71014		490.362
36.1014		12.7246	880.681			20.3043	12.8116		262.435
6.47826		113.116	998.507			4.26087	743.623
15.2319		22.1014	685.971			9.36232	787.725
43.8841		292	1312.62			18.5362	914.594
12.3043		11.1594	495.217			15.1014	61.1159
27.8551		828.783	1133.74			9.18841	1258.96
3.62319		23.4203	3142.42			31.6812	838.623
29.1304		5.15942	629.71			19.3768	11.4783
22		10.7101	1779.74			20.3188	11.2754
18.9565		18.4638	895.087			46.7391	1521
17.2609		7.26087	533.957			67.4203	14.8261
14.6232		31.1594	1108.51			75.4928	760.812
9.49275		5.34783	1536.9			13.3623	1147.12
11.4348		1.56522	913.623			7.26087	1083.99
9.23188		12.2464	1313.12			1.13043	5.3913
21.2464		11.6377	476.464			36.913	47.029
14.1159		14.5652	1604.38			10.7391	47.5652
8.07246		2.56522	1718.93			16.2754	1640.84
11.1304		410.507	769.478			11.3768	882.449
11.2464		1.98551	1244.61			72	752.536
43.2754		209.348	1213.65			7.7971	10.3188
15.4638		22.1884	2856.35			2.42029	4.97101
33.2609		19.2029	1331.91			21.6957	1076.35
11.7101		16.942	778.362			22.0435	204.783
21.6087		12.3478	1094.97			23.5507	475.768
22.7391		6.37681	545.159			985.072	2.28986
9.55072		17.5217	971.449			2247.01	1092.13
14.8551		191.449	543.594			1849.09	35.5072
16.2899		14.8841	1108.12			1.02899	13.2754
13.087		273.362	676.319			690.681	1449.8
11.8696		3.27536	1369.38			991.841	1.69565
31.7971		8.26087	1421.39			247.623	18.9565
10.029		4.23188	1507.87			575.696	1420.52
30.1159		3.81159	865.449			1.62319	636.116
15.5507		128.275	525.087			24.8116	8.10145
16.7391		9.30435	997.812			1311.77	1256.81
37.1304		86.1304	977.957			930.304	18.5362
35.6377		46.4783	1153.28			1173.38	718.101
28.3623		136.507	1311.61			1419.84	545.42
31.5362		12.5217	902.014			26.3333	1115.23
5.97101		5.65217	516.594			843.275	20.4783
36.2609		8.95652	606.116			1025.62	642.957
4.15942		763.638	823.101			1302.07	552.812
30.6812		377.29	991.217			433.667	908.942
		8.53623	1048.57			77.5362	1712.46
		7.92754	771.014			1049.67	502.623
		11.3478	413.493			1546.17	14.9565
		6.44928	2783.3			22.1159	358.609
		6.33333	1432.68			1726.03	343.449
		3.11594	798.116			1233.1	415.652
		479	1166.91			10.6957	571.232
		7.92754	1202.61			22.7826	1231.26
		40.2029	1473.14			1425.71	834.174
		465.986	561.754			1254.36	543.884
		10.971	1173.42			1597.87	547.783
		128.116	748.696			497.435	618.71
		18.7971	2841.07			800.493	1033.77
		4.42029	1002.81			21.0435	1315.04
		14.9275	813.768			32.0435	726.594
		20.6377	1244.04			26.3768	17.7101
		10.3913	1717.94			5.84058	12.1449
		14.4928	1262.61			1253.86	87.6522
		11.7826	2156.93			1927.71	703.188
		6.2029	719.304			1513.25	25.1304
		52.3768	817.232			27.8696	712.565
		80.4203	1575.52			1704.65	26.8261
		4.82609	709.928			1200.68	53.8986
		12.2609	989.13			39.9855	8.88406
		2.10145	700.696			1931.14	887.797
		2	1519.78			19.5797	314.507
		13.2029	1006.48			81.7246	860.87
		16.5652	736.754			29.8551	18.4203
		9.10145	780.072			1253.01	557.971
		223.638	1439.14			10.8116	317.551
		23.7681	948.957			1497.71	26
		5.55072	1446.87			35.2319	16.3478
		18.3913	1151.04			13.9855	630.609
		20.087	1113.58			35.4348	1186.94
		11.4493	1054.54			1312.28	5.13043
		31.7826	1596.39			42.8551	708.71
		12.4203	705.101			2040.38	6.6087
		13.5507	1542.46			840.072	1292.48
		17.6377	1183.39			1244.38	26.0145
		13.4203	1052.67			252.507	365.319
		8.17391	869.812			346.928	408.957
		25.4928	1679.51			914.478	991.87
		616.913	874.565			1041.83	12.058
		11.6667	999.42			1336.22	279.174
		16.9275	825.725			19.6232	240.319
		18.6522	1004.42			52.0435	478.348
		9.55072	1765.8			232.725	1269.83
		12.3623	1257.78			893.623	799.71
		59.6812	1235.33			27.9565	7.34783
		7.68116	973.681			112.072	2.7971
		3.56522	651.754			799.246	650.58
		3.34783	1336.23			1705.58	1.68116
		675.362	1135.78			1476.72	660.913
		8.3913	809.464			994.551	10.8696
		19.2754	3315.68			2331.2	807.101
		10.0435	2832.7			443.101	12.6522
		1.37681	1915.04			32.5797	1082.77
		16.4058	1197.58			777.101	505.754
		3.71014	1248.54			543.101	468.478
		8.37681	1055.77			12.0725	1082.26
		797.551	1382.03			1110.8	1309.86
		5.37681	939.609			1923.86	210.522
		15.4783	1974.87			1438.72	905.362
		7.05797	937.406			13.029	636.58
		5.17391	1354.01			1042.96	760.696
		9	993.884			1092.94	18.5942
		104.478	2128.55			24.6812	1468.84
		13.087	914.899			911.696	917.754
		8.62319	1840.58			991.261	504.435
		23.3768	1157.97			819.681	1694.93
		456.884	654.319			787.232	1055.29
		63.029	1111.57			883.101	878.406
		1.23188	769.638			21.3478	950.652
		12.6812	665.261			734.246	939.435
		13.3913	1431.28				929.797
		95.942	704.855				1661.13
		51.1739	1133.2				1264.29
			804.261				612.13
			745.681				1190.45
			2347.26				19.1304
			999.043				16.5362
			1442.84				962.725
			678.565				41.058
			1133.78				65.6667
			1199.68				810.029
			1414.83				1200.65
			712.203				37.4058
			1082.74				8.98551
			1481.38				380.667
			1347.99				12.0435
			874.522				427.783
			953.594				27.3768
			1051.86				1075.1
			1247.38				1080.39
			456.043				1418.87
			811.522				1291.32
			923.71				453.725
			534.203				631.464
			1586.67				561.464
			661.986				393.638
			1458.8				11.2609
			474.971				8.88406
			770.348				1406.54
			724.42				1036.19
			1531.46				42.7246
			771.304				247.261
			1286.03				415.899
			4628.9				365.739
			1307.67				19.1014
			705.362				15.3623
			946.522				950.275
			1124.07				1783.42
			2751.7				6.4058
			829.377				15.2029
			1026.19				6.92754
			1006.75				11.1594
			1417.19				1810.03
			1126.23				12.1449
			1139.77				628.174
			1467.25				1165.42
			1170.78				958.986
			1370.83				396.377
			1229.28				488.652
			883.681				1102.09
			465.899				9.66667
			674.116				1391.71
			957.652				908.681
			410.913				729.275
			1351.12				846.275
			814.014				356.362
			792.304				30.9275
			995.406				140.145
			1071.97				888.478
			1875.33				6.50725
			992.174				1347.22
			633.246				1018.67
			1099.36				42.0435
			1084.83				1.44928
			2079.17				11.942
			1364.12				12.3043
			2025.61				638.507
			878.072				886.913
			2579.91				21.913
			1130.43				993.493
			904.29				312.855
			1290.17				652.522
			892.13				1093.71
			796.362				1626.86
			1171.45				368.449
			765.261				2459.2
			1163.97				9.11594
			668.348				1715.78
			1236.19				563.667
			1038.48				992.13
			1977.38				672.275
			993.087				11.6667
			970.174				12.6087
			1278.97				1080.65
			1006.94				454.391
			3216.51				770.159
			639.942				523.507
			708.58				1236.52
			533.826				2.10145
			911.826				749.58
			696.884				2.10145
			956.246				1125.45
			874.638				341.217
			616.464				274.565
			1115.58				10.4493
			425.899				453.145
			439.174				530.754
			588.261				607.406
			645.899				553.899
			1241.16				619.986
			1101.22				541.652
			590.159				256.261
			1423.42				1537.39
			902.58				626.174
			870.913				153.609
			623.739				499.957
			1296.04				666.391
			836.246				1.81159
			1077.9				883.464
			946.536				317.536
			1459.14				15.971
			987.145				476.696
			802.783				498.638
			6729.77				764.783
			1135.58				889.696
			877.435				322.348
			853.855				421.681
			647.145				407.435
			476.101				509.71
			756.145				14.8261
			1186.06				997.348
			527.246				750.565
			800.957				1078.29
			1016.45				6.85507
			467.783				527.71
			1213.28				574.783
			850.261				2.84058
			703.319				574.725
			718.739				634.565
			973.797				687.362
			1132.06				6.72464
			535.406				341.841
			627.87				6.43478
			1145.72				10.5072
			665.406				828.652
			943.797				893.841
			448				36.0145
			618.957				8.71014
			2059.61				556.768
			446.594				1110.88
			1006.32				9.66667
			550.507				99.1739
			417.667				1172.67
			702.667				1121.19
			610.043				6.30435
			766.29				537.174
			639.565				569.725
			783.101				1118.13
			882.58				29.3913
			1294.94				749.464
			1402.57				365.696
			965.391				732.246
			894.768				1385.62
			1786.65				851.638
			1416.59				1395.03
			1205.57				29.0145
			683.58				955.377
			995.348				625.377
			933.957				713.913
			826.203				1213.38
			765.536				2.7971
			4396.23				17.5217
			663.899				31.3043
			1474.91				1224.28
			939.232				847.261
			681.391				734.855
			683.275				7.94203
			743.261				653.246
			502.797				1.02899
			1338.84				15.3188
			537.478				13.1594
			824.42				2.76812
			775.362				956.942
			757.014				450.058
			1040.2				11.6087
			1049.41				828.623
			3184.65				1399.03
			1605.54				31.6812
			808.913				1564.26
			1235.97				25.9565
			1360.35				672.841
			934.739				529.957
			780.159				2.49275
			1090.97				1002.07
			1069.54				780.493
			914.391				894.29
			563.478				1278.14
			948.899				9.84058
			661.188				907.754
			900.986				209.841
			780.449				262.087
			816.986				435.551
			776.319				14.6812
			823.913				419
			848.493				1203.29
			665.652				706.391
			629.435				8.34783
			1368.42				1080.38
			762.319				766.275
			819.739				745.304
			473.391				1.02899
			1007.67				489.623
			720.29				1247.51
			1284.23				633.072
			1633.26				882.507
			526.261				788.493
			501.261				233.768
			2165.77				817.899
			1107.48				191.029
			796.435				352.884
			811.435				4.63768
			1579.81				573.739
			1426.68				819.087
			1369.19				348.13
			478.609				299.768
			1271.29				471.362
			1034.41				4.86957
			2067.03				51.1449
			2529.07				285.014
			1388.39				29.6232
			1837.68				624.174
			858.623				933.116
			592.319				642.899
			889.696				915.783
			1195.09				9.81159
			1374.74				552.232
			1104.03				1428.71
			812.638				574.71
			906.551				542.609
			1692.36				325.826
			975.507				13.3333
			457.29				1021.03
			1236.43				13.8551
			1899.49				39.8406
			840.884				728.029
			842.145				597.826
			1330.19				426.739
			1523.33				940.522
			866.362				771.391
			760.087				945.855
			2528.16				22.9855
			1390.39				372.609
			940.565				10.7101
			2428.74				5.07246
			1800.43				10.4638
			891.145				404.13
							9.71014
							1153.2
							23.7101
							412.217
							4.47826
							7.68116
							12.8406
							667.681
							545.522
							701.116
							981.13
							1703.07
							558.464
							445.116
							1091.72
							16.5362
							900.464
							888.913
							1085.3
							71.971
							640.522
							1080.67
							796.101
							623.638
							856.71
							377.725
							767.638
							218.58
							633.072
							1126.88
							309.928
							1368.43
							800.261
							606.899
							1033.38
							10.1449
							943.072
							9.01449
							415.406
							73.9275
							17.9275
							738.333
							1255.48
							956.609
							7.37681
							86.2899
							3.63768
							926.725
							899.174
							976.812
							620.043
							1376.35
							1350.28
							17.2609
							1204.38
							868.435
							766.551
							818.58
							535.652
							115.783
							5.97101
							4.92754
							30.4058
							3.91304
							533.652
							221.594
							283.681
							13
							400.449
							815.029
							999.913
							255.565
							766.174
							18.7826
							412.812
							795.029
							849.188
							614.116
							1463.39
							408.797
							435.522
							3.81159
							336.638
							1496.16
							1010.88
							185.812
							747.464
							937.638
							246.391
							661.565
							471.87
							443.623
							1432.13
							586.333
							290.478
							666.029
							8.02899
							336.232
							622.333
							2097.39
							408.565
							819.812
							68.2319
							4.47826
							1147.14
							290.304
							1120.55
							4.65217
							708.725
							12.2029
							1094
							5.63768
							21.0435
							275.145
							9.57971
							246.536
							535.971
							1286.25
							216.029
							30.971
							1251.74
							1061.7
							994.783
							848.058
							401.913
							23.7536
							2.24638
							1387.57
							215.768
							22.942
							756.855
							2.4058
							733.913
							449.058
							1.34783
							1485.36
							996.464
							607.609
							737.681
							857.71
							8.97101
							862.058
							885.681
							14.6522
							509.203
							208.333
							1154.03
							26.1304
							548.377
							986.551
							11.0145
							9.50725
							641.145
							450.841
							1153.83
							24.058
							16.2754
							979.232
							643.884
							1283.68
							380.725
							320.87
							1.33333
							234.812
							647.638
							1229.67
							434.101
							641.551
							11.8116
							494
							1349.84
							8.43478
							468.652
							5.31884
							368.623
							1055.07
							4.30435
							303.217
							580.594
							9.05797
							1332.19
							539.275
							399.638
							746.754
							519.478
							671.333
							447.942
							724.362
							876.652
							1.78261
							1004.64
							471.101
							1718.23
							695.014
							642
							8.44928
							623.319
							394.87
							559.029
							6.62319
							322.087
							1276.46
							766.145
							792.464
							685.725
							1067.58
							799.826
							708.652
							753.551
							793.261
							378.696
							793.899
							942.058
							15.7246
							150.406
							856.754
							563.826
							309.87
							647.623
							6.43478
							14.7391
							559.377
							1122.58
							539.797
							834.377
							855.507
							13.7246
							687.739
							592.609
							1209.72
							8.89855
							1828.22
							1555.74
							599.014
							851.478
							1260.51
							2.08696
							600.188
							2.07246
							157.362
							1122.35
							399.638
							373.261
							2054.58
							10.2029
							1249.32
							1183.14
							1138.72
							27.3623
							110.203
							6.95652
							395.217
							1135.25
							1325.01
							1435.71
							22.0725
							37.6232
							1337.7
							467
							2044.88
							11.5652
							350.899
							1382.7
							87.2609
							3.4058
							973.768
							1307.13
							606.246
							435.304
							949.435
							55.4058
							1321
							1179.81
							27.3188
							1002.25
							33.5217
							927.884
							14.5217
							423.101
							617.087
							128.174
							454.855
							10.6522
							1440.45
							7.01449
							11.5217
							1081.93
							83.1594
							1839.96
							752.667
							1266.39
							1297.01
							107.754
							943.942
							41.5362
							11.3478
							938.014
							1094.83
							625.319
							1568.17
							684.29
							643.304
							1323.13
							783.986
							1441.9
							1525.83
							5.42029
							746.043
							849.449
							47.0145
							781.493
							538.696
							4.04348
							3.43478
							16.4638
							1020.41
							4.4058
							23.7391
							610.623
							202.449
							917.826
							7.42029
							7.34783
							1052.29
							1283.97
							1247.94
							1.42029
							716.435
							3.21739
							852.319
							490.116

## Sheet: histograms
	IPTG mM
Bin-size	0	0.004	0.006	0.006	0.008	0.008	0.01	0.012	0.015	0.015	0.02
0
100	0.01	0.0095068	0.00851738	0.00620469	0.00720968	0.0053317	0.00419487	0.00289304	0.00113445	0.000955711	0.000907441
200	0	0.000136054	0.000368098	0.000319829	0.000483871	0.0001638	0.000235897	0.000141753	0.00047619	0.00013986	0.000199637
300	0	3.40136e-05	0.000316973	0.000277186	0.000467742	0.00010647	0.000358974	0.000341495	0.000490196	0.000291375	0.000108893
400	0	8.5034e-05	0.000173824	0.000319829	0.000467742	0.00011466	0.000379487	0.000534794	0.000896359	0.000361305	7.25953e-05
500	0	3.40136e-05	0.000184049	0.000383795	0.000435484	0.00027027	0.0004	0.000728093	0.00127451	0.000431235	0.000145191
600	0	6.80272e-05	0.000122699	0.000341151	0.000258065	0.00030303	0.000523077	0.000728093	0.00121849	0.000547786	0.00030853
700	0	5.10204e-05	0.000102249	0.000341151	0.000225806	0.00037674	0.000502564	0.000747423	0.000938375	0.000477856	0.000453721
800	0	1.70068e-05	7.15746e-05	0.000383795	0.00016129	0.000466831	0.000564102	0.000773196	0.000854342	0.000780886	0.000816697
900	0	3.40136e-05	6.13497e-05	0.000149254	0.000129032	0.000466831	0.000553846	0.000560567	0.000812325	0.000594406	0.000816697
1000	0	1.70068e-05	2.04499e-05	0.000362473	6.45161e-05	0.00043407	0.000471795	0.000612113	0.00070028	0.000827506	0.000961887
1100	0	0	4.08998e-05	0.000149254	9.67742e-05	0.00028665	0.000348718	0.000386598	0.000392157	0.000745921	0.00108893
1200	0	0	1.02249e-05	0.000234542	0	0.00035217	0.000297436	0.000373711	0.000378151	0.00053613	0.000689655
1300	0	0	1.02249e-05	0.00010661	0	0.00027027	0.000297436	0.000354381	0.00012605	0.000617716	0.000725953
1400	0	1.70068e-05	0	0.000127932	0	0.00023751	0.000246154	0.000219072	5.60224e-05	0.000547786	0.000399274
1500	0	0	0	4.26439e-05	0	0.00020475	0.000153846	0.000141753	7.0028e-05	0.000512821	0.000598911
1600	0	0	0	6.39659e-05	0	0.00010647	0.000112821	0.000148196	0.000112045	0.000337995	0.000362976
1700	0	0	0	2.1322e-05	0	8.19001e-05	3.07692e-05	7.73196e-05	2.80112e-05	0.000337995	0.000362976
1800	0	0	0	4.26439e-05	0	7.37101e-05	8.20513e-05	8.37629e-05	1.40056e-05	0.000151515	0.000272232
1900	0	0	0	2.1322e-05	0	5.73301e-05	6.15385e-05	5.79897e-05	1.40056e-05	0.00018648	0.000163339
2000	0	0	0	4.26439e-05	0	2.457e-05	7.17949e-05	6.4433e-06	0	9.32401e-05	7.25953e-05
2100	0	0	0	4.26439e-05	0	4.095e-05	4.10256e-05	3.86598e-05	1.40056e-05	9.32401e-05	5.44465e-05
2200	0	0	0	2.1322e-05	0	4.914e-05	1.02564e-05	6.4433e-06	0	5.82751e-05	0.000127042
2300	0	0	0	0	0	0	1.02564e-05	1.28866e-05	0	5.82751e-05	5.44465e-05
2400	0	0	0	0	0	8.19001e-06	3.07692e-05	6.4433e-06	0	5.82751e-05	9.07441e-05
2500	0	0	0	0	0	2.457e-05	2.05128e-05	1.28866e-05	0	4.66201e-05	3.62976e-05
