# Supplementary material for: An analog to digital converter controls bistable transfer competence development of a widespread bacterial integrative and conjugative element
Source: eLife journal article supplement (doi:10.7554/elife.57915), 2020-07-27
Supplement: supp [file elife_poa_e57915_Supplementary_file_4.pdf › elife_poa_e57915_Supplementary_file_4.pdf]

SUPPLEMENTARY MATERIAL  
ICEclc transfer competence bistable regulatory model

REACTIONS

- A: BisDC feedback loop on alpA-promoter
- B: BisDC feedback loop on alpA-promoter, initiated by BisR
- C: TciR activating bisR-promoter
- D: BisDC activating three downstream (late) promoters
- E: BisDC activating GFP reporter.

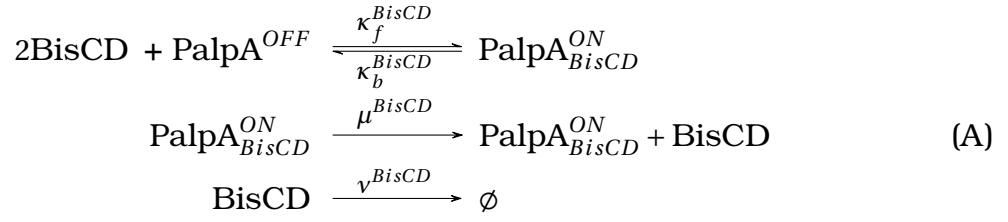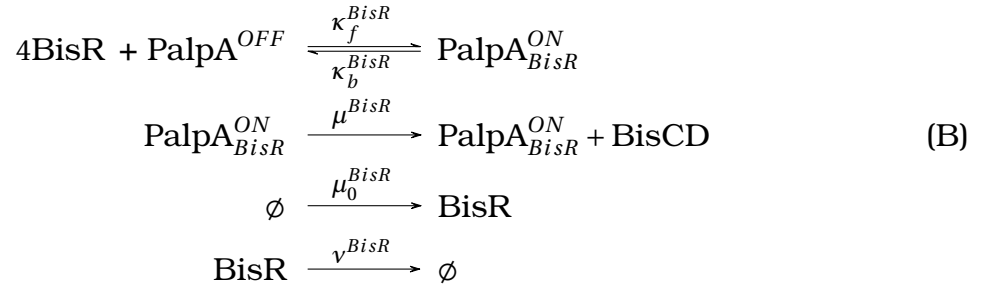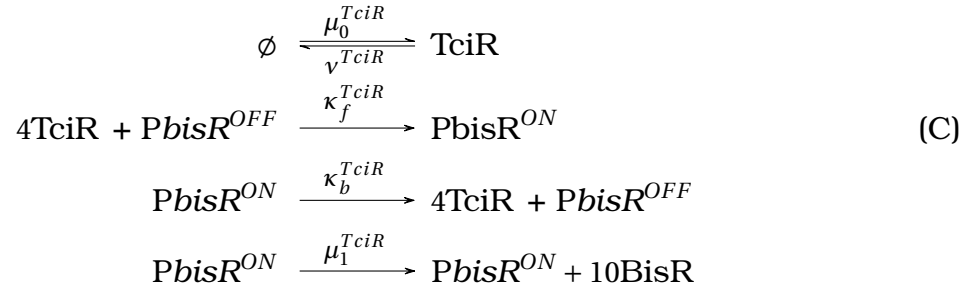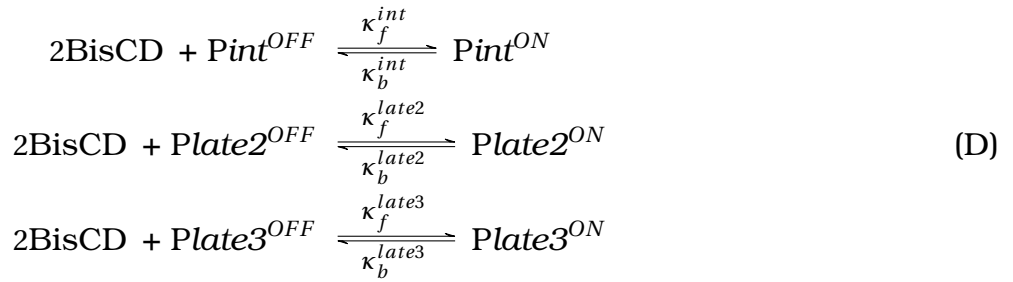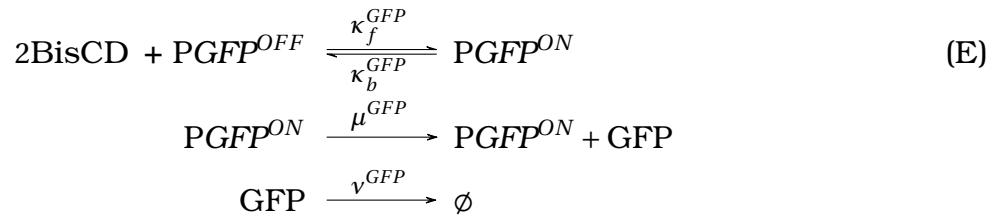

| List of variables |                                                                            |
|-------------------|----------------------------------------------------------------------------|
| Variable          | Explanation                                                                |
| BisCD             | Activator protein complex for $P_{alpA}$ and for late promoters            |
| $P_{alpA}$        | Promoter driving expression of <i>bisCD</i>                                |
| BisR              | Activator protein for $P_{alpA}$                                           |
| TciR              | Activator protein for $P_{bisR}$                                           |
| $P_{bisR}$        | Promoter driving expression of <i>bisR</i>                                 |
| $P_{int}$         | (Late) promoter driving expression of the integrase                        |
| $P_{late2}$       | Late promoter nr 2 activated by BisCD                                      |
| $P_{late3}$       | Late promoter nr 3 activated by BisCD                                      |
| $P_{GFP}$         | Late promoter controlling artificial expression of GFP, activated by BisCD |

| List of parameters |            |                 |                                                            |
|--------------------|------------|-----------------|------------------------------------------------------------|
| Parameter          | Value      | Symbol in Julia | Explanation                                                |
| $\kappa_f^{BisCD}$ | 1.0 or 5.0 | A1              | binding rate of BisCD to $P_{alpA}$                        |
| $\kappa_b^{BisCD}$ | 1.0 or 5.0 | A2              | unbinding rate of BisCD to $P_{alpA}$                      |
| $\mu^{BisCD}$      | 1.0        | A3              | production rate of BisCD when BisCD is bound to $P_{alpA}$ |
| $\nu^{BisCD}$      | 0.17 - 0.3 | A4              | degradation rate of BisCD                                  |
| $\kappa_f^{BisR}$  | 1.0        | B1              | binding rate of BisR to $P_{alpA}$                         |
| $\kappa_b^{BisR}$  | 1.0        | B2              | unbinding rate of BisR to $P_{alpA}$                       |
| $\mu^{BisR}$       | 1.0        | B3              | production rate of BisCD when BisR is bound to $P_{alpA}$  |
| $\mu_0^{BisR}$     | 0.0 - 1.0  | B4              | basal production rate of BisR                              |
| $\nu^{BisR}$       | 0.17       | B5              | degradation rate of BisR                                   |
| $\mu_0^{TciR}$     | 0.35       | C1              | basal production rate of TciR                              |
| $\nu^{TciR}$       | 0.17       | C2              | degradation rate of TciR                                   |
| $\kappa_f^{TciR}$  | 1.0        | C3              | binding rate of TciR to $P_{bisR}$                         |
| $\kappa_b^{TciR}$  | 1.0        | C4              | unbinding rate of TciR to $P_{bisR}$                       |
| $\mu_1^{TciR}$     | 1.0        | C5              | production rate of BisR when TciR is bound to $P_{bisR}$   |
| $\kappa_f^{int}$   | 1.0        | D1              | binding rate of BisCD to $P_{int}$                         |
| $\kappa_b^{int}$   | 1.0        | D2              | unbinding rate of BisCD to $P_{int}$                       |
| $\kappa_f^{late2}$ | 1.0        | D3              | binding rate of BisCD to $P_{late2}$                       |
| $\kappa_b^{late2}$ | 1.0        | D4              | unbinding rate of BisCD to $P_{late2}$                     |
| $\kappa_f^{late3}$ | 1.0        | D5              | binding rate of BisCD to $P_{late3}$                       |
| $\kappa_b^{late3}$ | 1.0        | D6              | unbinding rate of BisCD to $P_{late3}$                     |
| $\kappa_f^{GFP}$   | 1.0        | E1              | binding rate of BisCD to $P_{GFP}$                         |
| $\kappa_b^{GFP}$   | 1.0        | E2              | unbinding rate of BisCD to $P_{GFP}$                       |
| $\mu^{GFP}$        | 1.0        | E3              | production rate of GFP when BisCD is bound to $P_{GFP}$    |
| $\nu^{GFP}$        | 0 or 0.17  | E4              | degradation rate of GFP                                    |
