# Supplementary material for: An analog to digital converter controls bistable transfer competence development of a widespread bacterial integrative and conjugative element
Source: eLife. 2020 Jul 28;9:e57915. doi: 10.7554/eLife.57915 (PMC7423338; doi:10.7554/eLife.57915)
Supplement: Supplementary file 2. [file elife-57915-supp2.docx]

*Pseudomonas putida* type 21 C defined minimal medium (Gerhard *et al*., 1981):

(per liter)

NH4Cl 1.00 g

Na2HPO4 . 2H2O 3.49 g

KH2PO4 2.77 g

pH 6.8, sterilize by autoclaving afterwards add:

Hutner’s vitamin free mineral base (sterile) 20 ml

vitamins (500 x) sterile 2 ml

Hutner’s vitamin free mineral base:

(per liter)

NTA (nitrilotriacetic acid, chelating agent) 10 g

MgSO4 . 7 H2O 14.45 g

CaCl2 . 2H2O 3.33 g

(NH4)6Mo7O24 . 4 H2O9.74 mg

FeSO4 . 7 H2O 99 mg

Metals 44 50 ml

Add each compound in this order. Wait until compound is entirely dissolved prior to adding the next one.

sterilize by filtration and store it at 4 °C.

Metals 44:

(per 100 ml)

Na4EDTA . 4 H2O 387 mg

ZnSO4 . 7 H2O 1.095 g

FeSO4 . 7H2O 914 mg

MnSO4. H2O 154 mg

CuSO4 . 5 H2O 39.2 mg

Co(NO3)2 . 6 H2O 24.8 mg

Na2B4O7.10 H2O 17.7 mg

+ a few trops of 6 N H2SO4

sterilize by filtration and store it at 4 °C.

Vitamin solution (500 x):

(per 100 ml)

Biotin 0.5 mg

Nicotinic acid 50 mg

thiamin hydrochloride 25 mg

sterilize by filtration and store it at 4 °C.
